# Supplementary material for: Strain-Level microbial signatures and inferred functional alterations in infants with Food Protein-Induced Allergic Proctocolitis
Source: Research Square preprint supplement (doi:10.21203/rs.3.rs-7112201/v1), 2025-08-27
Supplement: Supplementary file 1 [file 0bcfa86d26aadcce3df8435c.xlsx]

## Sheet: Sheet1
Main_Node	AP	No_AP	Chi_Square	P_Value	infant_based	FDR_Adjusted_P_Value
240	147	92	12.6569	0.000374181	FALSE	0.0177362
241	77	30	20.6449	5.52854e-06	FALSE	0.00109623
242	3	1	1	0.317311	FALSE	0.432199
243	2	0	2	0.157299	TRUE	0.24366
244	1	1	0	1	FALSE	1
245	74	29	19.6602	9.25085e-06	FALSE	0.00109623
246	68	29	15.6804	7.49968e-05	FALSE	0.00592475
247	8	0	8	0.00467773	TRUE	0.110862
248	7	0	7	0.00815097	TRUE	0.175616
249	6	0	6	0.0143059	TRUE	0.178447
250	5	0	5	0.0253473	TRUE	0.214547
251	4	0	4	0.0455003	TRUE	0.239635
252	3	0	3	0.0832645	TRUE	0.243626
253	2	0	2	0.157299	TRUE	0.24366
254	60	29	10.7978	0.00101623	FALSE	0.0401412
255	15	13	0.142857	0.705457	FALSE	0.840167
256	11	2	6.23077	0.0125549	FALSE	0.178447
257	9	2	4.45455	0.0348085	FALSE	0.239635
258	3	0	3	0.0832645	FALSE	0.243626
259	2	0	2	0.157299	TRUE	0.24366
260	6	2	2	0.157299	FALSE	0.24366
261	5	1	2.66667	0.10247	FALSE	0.24366
262	5	0	5	0.0253473	TRUE	0.214547
263	4	0	4	0.0455003	TRUE	0.239635
264	2	0	2	0.157299	TRUE	0.24366
265	2	0	2	0.157299	TRUE	0.24366
266	1	1	0	1	FALSE	1
267	2	0	2	0.157299	TRUE	0.24366
268	4	11	3.26667	0.0707011	FALSE	0.243626
269	4	10	2.57143	0.108809	FALSE	0.24366
270	4	8	1.33333	0.248213	FALSE	0.360899
271	0	6	6	0.0143059	FALSE	0.178447
272	0	3	3	0.0832645	TRUE	0.243626
273	0	2	2	0.157299	TRUE	0.24366
274	0	3	3	0.0832645	TRUE	0.243626
275	0	2	2	0.157299	TRUE	0.24366
276	4	2	0.666667	0.414216	FALSE	0.554628
277	2	0	2	0.157299	TRUE	0.24366
278	2	2	0	1	FALSE	1
279	1	2	0.333333	0.563703	FALSE	0.695821
280	1	1	0	1	FALSE	1
281	0	2	2	0.157299	TRUE	0.24366
282	45	16	13.7869	0.000204761	FALSE	0.0121321
283	12	4	4	0.0455003	FALSE	0.239635
284	2	0	2	0.157299	FALSE	0.24366
285	10	4	2.57143	0.108809	FALSE	0.24366
286	9	3	3	0.0832645	FALSE	0.243626
287	7	3	1.6	0.205903	FALSE	0.304994
288	3	1	1	0.317311	FALSE	0.432199
289	3	0	3	0.0832645	FALSE	0.243626
290	2	0	2	0.157299	TRUE	0.24366
291	4	2	0.666667	0.414216	FALSE	0.554628
292	1	1	0	1	FALSE	1
293	3	1	1	0.317311	FALSE	0.432199
294	2	1	0.333333	0.563703	FALSE	0.695821
295	2	0	2	0.157299	FALSE	0.24366
296	2	0	2	0.157299	TRUE	0.24366
297	1	1	0	1	FALSE	1
298	33	12	9.8	0.00174512	FALSE	0.0590847
299	30	11	8.80488	0.00300426	FALSE	0.0791122
300	5	1	2.66667	0.10247	FALSE	0.24366
301	5	0	5	0.0253473	FALSE	0.214547
302	2	0	2	0.157299	TRUE	0.24366
303	3	0	3	0.0832645	FALSE	0.243626
304	2	0	2	0.157299	TRUE	0.24366
305	25	10	6.42857	0.0112299	FALSE	0.178447
306	6	1	3.57143	0.0587817	FALSE	0.243626
307	5	1	2.66667	0.10247	FALSE	0.24366
308	2	1	0.333333	0.563703	FALSE	0.695821
309	1	1	0	1	FALSE	1
310	3	0	3	0.0832645	FALSE	0.243626
311	2	0	2	0.157299	TRUE	0.24366
312	19	9	3.57143	0.0587817	FALSE	0.243626
313	18	9	3	0.0832645	FALSE	0.243626
314	18	8	3.84615	0.0498602	FALSE	0.243626
315	17	8	3.24	0.0718606	FALSE	0.243626
316	16	8	2.66667	0.10247	FALSE	0.24366
317	14	8	1.63636	0.200825	FALSE	0.299343
318	0	2	2	0.157299	FALSE	0.24366
319	14	6	3.2	0.0736383	FALSE	0.243626
320	5	0	5	0.0253473	FALSE	0.214547
321	4	0	4	0.0455003	FALSE	0.239635
322	3	0	3	0.0832645	TRUE	0.243626
323	2	0	2	0.157299	TRUE	0.24366
324	9	6	0.6	0.438578	FALSE	0.583949
325	6	0	6	0.0143059	FALSE	0.178447
326	4	0	4	0.0455003	FALSE	0.239635
327	2	0	2	0.157299	TRUE	0.24366
328	2	0	2	0.157299	TRUE	0.24366
329	2	0	2	0.157299	TRUE	0.24366
330	3	6	1	0.317311	FALSE	0.432199
331	3	2	0.2	0.654721	FALSE	0.791678
332	0	2	2	0.157299	TRUE	0.24366
333	3	0	3	0.0832645	TRUE	0.243626
334	2	0	2	0.157299	TRUE	0.24366
335	0	4	4	0.0455003	FALSE	0.239635
336	0	2	2	0.157299	TRUE	0.24366
337	0	2	2	0.157299	TRUE	0.24366
338	2	0	2	0.157299	FALSE	0.24366
339	3	1	1	0.317311	FALSE	0.432199
340	1	1	0	1	FALSE	1
341	2	0	2	0.157299	TRUE	0.24366
342	6	0	6	0.0143059	FALSE	0.178447
343	5	0	5	0.0253473	TRUE	0.214547
344	4	0	4	0.0455003	TRUE	0.239635
345	2	0	2	0.157299	TRUE	0.24366
346	2	0	2	0.157299	TRUE	0.24366
347	66	62	0.125	0.723674	FALSE	0.857553
348	7	2	2.77778	0.0955807	FALSE	0.24366
349	6	2	2	0.157299	FALSE	0.24366
350	1	2	0.333333	0.563703	FALSE	0.695821
351	0	2	2	0.157299	TRUE	0.24366
352	5	0	5	0.0253473	FALSE	0.214547
353	4	0	4	0.0455003	TRUE	0.239635
354	3	0	3	0.0832645	TRUE	0.243626
355	2	0	2	0.157299	TRUE	0.24366
356	59	60	0.00840336	0.92696	FALSE	1
357	14	15	0.0344828	0.852684	FALSE	0.966919
358	3	3	0	1	FALSE	1
359	0	2	2	0.157299	FALSE	0.24366
360	3	1	1	0.317311	FALSE	0.432199
361	3	0	3	0.0832645	FALSE	0.243626
362	2	0	2	0.157299	TRUE	0.24366
363	11	12	0.0434783	0.834827	FALSE	0.951222
364	0	3	3	0.0832645	TRUE	0.243626
365	0	2	2	0.157299	TRUE	0.24366
366	11	9	0.2	0.654721	FALSE	0.791678
367	11	8	0.473684	0.491297	FALSE	0.646875
368	11	7	0.888889	0.345779	FALSE	0.468283
369	10	5	1.66667	0.196706	FALSE	0.295058
370	4	0	4	0.0455003	FALSE	0.239635
371	3	0	3	0.0832645	FALSE	0.243626
372	2	0	2	0.157299	TRUE	0.24366
373	6	5	0.0909091	0.763025	FALSE	0.882131
374	4	3	0.142857	0.705457	FALSE	0.840167
375	3	3	0	1	FALSE	1
376	2	3	0.2	0.654721	FALSE	0.791678
377	0	3	3	0.0832645	TRUE	0.243626
378	0	2	2	0.157299	TRUE	0.24366
379	2	0	2	0.157299	TRUE	0.24366
380	2	2	0	1	FALSE	1
381	1	2	0.333333	0.563703	FALSE	0.695821
382	1	1	0	1	FALSE	1
383	1	2	0.333333	0.563703	FALSE	0.695821
384	0	2	2	0.157299	TRUE	0.24366
385	45	45	0	1	FALSE	1
386	0	2	2	0.157299	TRUE	0.24366
387	45	43	0.0454545	0.83117	FALSE	0.951222
388	42	43	0.0117647	0.913627	FALSE	1
389	2	0	2	0.157299	FALSE	0.24366
390	40	43	0.108434	0.741934	FALSE	0.866199
391	36	40	0.210526	0.646355	FALSE	0.791678
392	20	22	0.0952381	0.757621	FALSE	0.880177
393	7	12	1.31579	0.251349	FALSE	0.36323
394	6	11	1.47059	0.225253	FALSE	0.329537
395	0	5	5	0.0253473	TRUE	0.214547
396	0	4	4	0.0455003	TRUE	0.239635
397	0	3	3	0.0832645	TRUE	0.243626
398	0	2	2	0.157299	TRUE	0.24366
399	6	6	0	1	FALSE	1
400	1	2	0.333333	0.563703	FALSE	0.695821
401	1	1	0	1	FALSE	1
402	5	4	0.111111	0.738883	FALSE	0.866199
403	4	4	0	1	FALSE	1
404	0	3	3	0.0832645	TRUE	0.243626
405	0	2	2	0.157299	TRUE	0.24366
406	4	1	1.8	0.179712	FALSE	0.271286
407	3	1	1	0.317311	FALSE	0.432199
408	3	0	3	0.0832645	FALSE	0.243626
409	2	0	2	0.157299	FALSE	0.24366
410	1	1	0	1	FALSE	1
411	13	10	0.391304	0.531615	FALSE	0.695821
412	6	3	1	0.317311	FALSE	0.432199
413	3	3	0	1	FALSE	1
414	1	2	0.333333	0.563703	FALSE	0.695821
415	1	1	0	1	FALSE	1
416	2	1	0.333333	0.563703	FALSE	0.695821
417	1	1	0	1	FALSE	1
418	3	0	3	0.0832645	FALSE	0.243626
419	2	0	2	0.157299	TRUE	0.24366
420	7	7	0	1	FALSE	1
421	6	7	0.0769231	0.781511	FALSE	0.899117
422	6	6	0	1	FALSE	1
423	1	1	0	1	FALSE	1
424	5	5	0	1	FALSE	1
425	5	3	0.5	0.4795	FALSE	0.634869
426	1	3	1	0.317311	FALSE	0.432199
427	0	3	3	0.0832645	TRUE	0.243626
428	0	2	2	0.157299	TRUE	0.24366
429	4	0	4	0.0455003	FALSE	0.239635
430	3	0	3	0.0832645	FALSE	0.243626
431	2	0	2	0.157299	TRUE	0.24366
432	0	2	2	0.157299	TRUE	0.24366
433	16	18	0.117647	0.731601	FALSE	0.862634
434	12	18	1.2	0.273322	FALSE	0.392589
435	10	17	1.81481	0.177932	FALSE	0.271286
436	1	1	0	1	FALSE	1
437	9	16	1.96	0.161513	FALSE	0.248563
438	9	15	1.5	0.220671	FALSE	0.324839
439	4	15	6.36842	0.0116169	FALSE	0.178447
440	4	14	5.55556	0.0184221	FALSE	0.214547
441	4	13	4.76471	0.029049	FALSE	0.237401
442	4	10	2.57143	0.108809	FALSE	0.24366
443	4	1	1.8	0.179712	FALSE	0.271286
444	2	0	2	0.157299	TRUE	0.24366
445	2	1	0.333333	0.563703	FALSE	0.695821
446	1	1	0	1	FALSE	1
447	0	9	9	0.0026998	FALSE	0.0791122
448	0	3	3	0.0832645	TRUE	0.243626
449	0	2	2	0.157299	TRUE	0.24366
450	0	6	6	0.0143059	FALSE	0.178447
451	0	2	2	0.157299	TRUE	0.24366
452	0	4	4	0.0455003	TRUE	0.239635
453	0	2	2	0.157299	TRUE	0.24366
454	0	2	2	0.157299	TRUE	0.24366
455	0	3	3	0.0832645	TRUE	0.243626
456	0	2	2	0.157299	TRUE	0.24366
457	5	0	5	0.0253473	FALSE	0.214547
458	2	0	2	0.157299	TRUE	0.24366
459	3	0	3	0.0832645	FALSE	0.243626
460	2	0	2	0.157299	TRUE	0.24366
461	2	1	0.333333	0.563703	FALSE	0.695821
462	2	0	2	0.157299	TRUE	0.24366
463	4	0	4	0.0455003	FALSE	0.239635
464	3	0	3	0.0832645	TRUE	0.243626
465	2	0	2	0.157299	TRUE	0.24366
466	4	3	0.142857	0.705457	FALSE	0.840167
467	4	0	4	0.0455003	FALSE	0.239635
468	3	0	3	0.0832645	FALSE	0.243626
469	2	0	2	0.157299	FALSE	0.24366
470	0	3	3	0.0832645	FALSE	0.243626
471	0	2	2	0.157299	FALSE	0.24366
472	3	0	3	0.0832645	FALSE	0.243626
473	2	0	2	0.157299	TRUE	0.24366
474	4	0	4	0.0455003	FALSE	0.239635
475	3	0	3	0.0832645	TRUE	0.243626
476	2	0	2	0.157299	TRUE	0.24366
