# Supplementary material for: Strain-Level microbial signatures and inferred functional alterations in infants with Food Protein-Induced Allergic Proctocolitis
Source: Research Square preprint supplement (doi:10.21203/rs.3.rs-7112201/v1), 2025-08-27
Supplement: Supplementary file 2 [file 17b9af7f334875875d098a5d.xlsx]

## Sheet: biological_process_result_table
Gene.Ontology.Terms	p.values	Matches	gene_counts
proton motive force-driven plasma membrane ATP synthesis	9.23674e-05	atpG // atpA // atpH // atpD // atpC // atpE	6
cell adhesion	9.23674e-05	ycbV // yadC // yadK // yfcP // sfmH // yadM // fimA // yadN // yadL // yfcQ // yfcR // yadV // htrE	13
ATP biosynthetic process	9.23674e-05	atpG // atpA // atpH // atpD // atpC // atpE	6
proton motive force-driven ATP synthesis	9.23674e-05	atpG // atpA // atpH // atpD // atpC // atpE	6
cell adhesion involved in single-species biofilm formation	0.000132833	ycbV // yadC // yadK // yfcP // sfmH // yadM // fimA // yadN // yadL // yfcQ // yfcR	11
cell-substrate adhesion	0.000213114	ycbV // yadC // yadK // yfcP // sfmH // yadM // fimA // yadN // yadL // yfcQ // yfcR	11
cell adhesion involved in biofilm formation	0.000213114	ycbV // yadC // yadK // yfcP // sfmH // yadM // fimA // yadN // yadL // yfcQ // yfcR	11
purine ribonucleoside triphosphate biosynthetic process	0.000213114	atpG // atpA // atpH // atpD // atpC // atpE	6
purine nucleoside triphosphate biosynthetic process	0.000213114	atpG // atpA // atpH // atpD // atpC // atpE	6
ribonucleoside triphosphate biosynthetic process	0.00111992	atpG // atpA // atpH // atpD // atpC // atpE	6
aldonic acid catabolic process	0.00111992	idnT // dgoD // lgoR // gntP // gntR // yjhG // yjhH	7
carbohydrate transmembrane transport	0.00131963	manX // manZ // ptsG // ulaA // ulaB // ulaC // gatB // gatC // bglF // srlR // idnT // fucP // alsC // lacY // gntP	15
aldonic acid metabolic process	0.00188465	dgoD // lgoR // idnT // gntP // gntR // yjhG // yjhH	7
ATP metabolic process	0.0043023	mdh // atpG // atpA // atpH // atpD // atpC // atpE	7
carbohydrate transport	0.00502871	bglF // lacY // manX // manZ // ptsG // ulaA // ulaB // ulaC // gatB // gatC // srlR // idnT // fucP // alsC // gntP	15
nucleoside triphosphate biosynthetic process	0.00559014	atpG // atpA // atpH // atpD // atpC // atpE	6
phosphoenolpyruvate-dependent sugar phosphotransferase system	0.00561822	ulaA // ulaB // ulaC // manZ // ptsG // gatB // gatC // bglF // srlR // manX	10
