# Supplementary material for: Strain-Level microbial signatures and inferred functional alterations in infants with Food Protein-Induced Allergic Proctocolitis
Source: Research Square preprint supplement (doi:10.21203/rs.3.rs-7112201/v1), 2025-08-27
Supplement: Supplementary file 3 [file 269517abc298e113ce45766e.xlsx]

## Sheet: spc
Condition	True_AP_to_Pred_AP_Raw	True_AP_to_Pred_AP_Percent	True_AP_to_Pred_Control_Raw	True_AP_to_Pred_Control_Percent	True_Control_to_Pred_AP_Raw	True_Control_to_Pred_AP_Percent	True_Control_to_Pred_Control_Raw	True_Control_to_Pred_Control_Percent
Age > 6	146	71.2	18	35.3	59	28.8	33	64.7
Age ≤ 4	172	70.5	42	28.8	72	29.5	104	71.2
All samples	359	68.1	75	35.2	168	31.9	138	64.8

## Sheet: genus
Condition	True_AP_to_Pred_AP_Raw	True_AP_to_Pred_AP_Percent	True_AP_to_Pred_Control_Raw	True_AP_to_Pred_Control_Percent	True_Control_to_Pred_AP_Raw	True_Control_to_Pred_AP_Percent	True_Control_to_Pred_Control_Raw	True_Control_to_Pred_Control_Percent
Age > 6	143	69.4	21	42.9	63	30.6	28	57.1
Age ≤ 4	162	68.9	52	33.5	73	31.1	103	66.5
All samples	345	67.5	89	39.2	166	32.5	138	60.8
