# Supplementary material for: Strain-Level microbial signatures and inferred functional alterations in infants with Food Protein-Induced Allergic Proctocolitis
Source: Research Square preprint supplement (doi:10.21203/rs.3.rs-7112201/v1), 2025-08-27
Supplement: Supplementary file 4 [file 50efdc74f3d88fdbcebc2c77.xlsx]

## Sheet: 0-2 samples - genus level
feature	value	coef	coef (abs)	stderr	N	N.not.0	pval	qval
f__Staphylococcaceae.g__Staphylococcus	visit_age_mo	-0.0308973	0.0308973	0.00439365	293	200	1.48053e-11	1.18443e-09
f__Bacteroidaceae.g__Bacteroides	Vaginal	0.265628	0.265628	0.0428293	293	138	1.93076e-09	7.72303e-08
f__Veillonellaceae.g__Veillonella	Vaginal	-0.136196	0.136196	0.0326852	293	205	4.08673e-05	0.00108979
f__Bacteroidales_unclassified.g__Phocaeicola	Vaginal	0.128386	0.128386	0.0329113	293	110	0.000119317	0.00238635
f__Streptococcaceae.g__Streptococcus	visit_age_mo	-0.0411336	0.0411336	0.0107823	293	276	0.000166716	0.00266746
f__Eggerthellaceae.g__Eggerthella	visit_age_mo	0.00640974	0.00640974	0.00188566	293	67	0.000771229	0.010283
f__Tannerellaceae.g__Parabacteroides	Vaginal	0.0748234	0.0748234	0.0225106	293	86	0.00100244	0.0114565
f__Erysipelotrichaceae.g__Erysipelatoclostridium	visit_age_mo	0.0215276	0.0215276	0.00679604	293	77	0.00170181	0.0170181
f__Micrococcaceae.g__Rothia	probiotics_firstyr	0.00630835	0.00630835	0.00203627	293	155	0.0021407	0.0190285
f__Enterobacteriaceae.g__Klebsiella	AP	-0.113656	0.113656	0.0374815	293	128	0.00264763	0.021181
f__Lactobacillaceae.g__Lacticaseibacillus	visit_age_mo	0.0242102	0.0242102	0.00813102	293	92	0.00315301	0.022931
f__Bifidobacteriaceae.g__Bifidobacterium	visit_age_mo	0.0737437	0.0737437	0.0269368	293	179	0.00657307	0.0381238
f__Enterococcaceae.g__Enterococcus	Vaginal	-0.0424171	-0.0424171	0.0155225	293	183	0.00667166	0.0381238
f__Clostridiaceae.g__Clostridium	Vaginal	-0.0722385	-0.0722385	0.0261279	293	156	0.00606334	0.0381238
f__Enterococcaceae.g__Enterococcus	AP	-0.0430639	-0.0430639	0.0169387	293	183	0.0115349	0.0576747
f__Enterobacteriaceae.g__Escherichia	probiotics_firstyr	-0.0700571	-0.0700571	0.0275324	293	185	0.0114645	0.0576747
f__Enterococcaceae.g__Enterococcus	visit_age_mo	-0.0176149	-0.0176149	0.00704243	293	183	0.0129309	0.0607798
f__Streptococcaceae.g__Streptococcus	Vaginal	-0.0589607	-0.0589607	0.0237657	293	276	0.0136754	0.0607798
f__Enterobacteriaceae.g__Escherichia	AP	0.135725	0.135725	0.056063	293	185	0.0160988	0.0677844
f__Tannerellaceae.g__Parabacteroides	probiotics_firstyr	-0.0278075	-0.0278075	0.0120635	293	86	0.021872	0.0868215
f__Enterococcaceae.g__Enterococcus	probiotics_firstyr	0.0187483	0.0187483	0.00831855	293	183	0.0249612	0.0868215
f__Clostridiaceae.g__Clostridium	probiotics_firstyr	0.0317471	0.0317471	0.014002	293	156	0.0241118	0.0868215
f__Enterobacteriaceae.g__Klebsiella	Vaginal	-0.0775855	-0.0775855	0.0343478	293	128	0.0246424	0.0868215
f__Lactobacillaceae.g__Lacticaseibacillus	probiotics_firstyr	0.0210837	0.0210837	0.0096044	293	92	0.0289462	0.0964873
f__Clostridiaceae.g__Clostridium	visit_age_mo	0.0237794	0.0237794	0.011854	293	156	0.0457894	0.146526
f__Staphylococcaceae.g__Staphylococcus	Vaginal	-0.0186663	-0.0186663	0.00968422	293	200	0.0549015	0.168928
f__Enterobacteriaceae.g__Citrobacter	Vaginal	-0.0400578	-0.0400578	0.0220435	293	54	0.0702235	0.20807
f__Eggerthellaceae.g__Eggerthella	Vaginal	0.00696645	0.00696645	0.00415626	293	67	0.0947966	0.258701
f__Bacteroidales_unclassified.g__Phocaeicola	probiotics_firstyr	-0.0293649	-0.0293649	0.0176373	293	110	0.097013	0.258701
f__Lachnospiraceae.g__Mediterraneibacter	visit_age_mo	0.0125361	0.0125361	0.00745223	293	69	0.0936141	0.258701
f__Lachnospiraceae.g__Mediterraneibacter	Vaginal	0.0266644	0.0266644	0.0164257	293	69	0.105613	0.269869
f__Enterobacteriaceae.g__Klebsiella	probiotics_firstyr	0.0296815	0.0296815	0.0184071	293	128	0.107947	0.269869
f__Actinomycetaceae.g__Actinomyces	Vaginal	0.0320338	0.0320338	0.020153	293	60	0.113038	0.274032
f__Clostridiaceae.g__Clostridium	AP	-0.0444295	-0.0444295	0.0285117	293	156	0.120262	0.274885
f__Enterobacteriaceae.g__Citrobacter	probiotics_firstyr	0.0185232	0.0185232	0.0118132	293	54	0.117978	0.274885

## Sheet: Pre-symptomatic - genus level
feature	value	coef	coef (abs)	stderr	N	N.not.0	pval	qval
f__Staphylococcaceae.g__Staphylococcus	visit_age_mo	-0.0322546	-0.0322546	0.0106677	92	71	0.00328224	0.0642488
f__Clostridiaceae.g__Clostridium	Vaginal	-0.136256	-0.136256	0.0454881	92	43	0.00356938	0.0642488
f__Veillonellaceae.g__Veillonella	Vaginal	-0.17625	-0.17625	0.0584021	92	69	0.0033387	0.0642488
f__Enterobacteriaceae.g__Klebsiella	visit_age_mo	0.0861782	0.0861782	0.028427	92	35	0.00320488	0.0642488
f__Bacteroidales_unclassified.g__Phocaeicola	Vaginal	0.167909	0.167909	0.0622032	92	40	0.00834606	0.120183
f__Bacteroidaceae.g__Bacteroides	Vaginal	0.194664	0.194664	0.0849981	92	50	0.0244273	0.293128

## Sheet: Symptomatic - genus level
feature	value	coef	coef (abs)	stderr	N	N.not.0	pval	qval
f__Bacteroidaceae.g__Bacteroides	Vaginal	0.253983	0.253983	0.059887	132	66	4.2505e-05	0.00408048
f__Staphylococcaceae.g__Staphylococcus	visit_age_mo	-0.0137585	-0.0137585	0.00413396	132	66	0.00114411	0.0549171
f__Tannerellaceae.g__Parabacteroides	Vaginal	0.0635891	0.0635891	0.0203016	132	37	0.00215403	0.0672166
f__Staphylococcaceae.g__Staphylococcus	probiotics_firstyr	0.0139208	0.0139208	0.00456671	132	66	0.00280069	0.0672166
f__Propionibacteriaceae.g__Cutibacterium	Symptomatic	-0.0312405	-0.0312405	0.0110311	132	27	0.00538015	0.0681422
f__Eggerthellaceae.g__Eggerthella	visit_age_mo	0.00719347	0.00719347	0.00255664	132	39	0.00567851	0.0681422
f__Enterobacteriaceae.g__Citrobacter	Vaginal	-0.0704613	-0.0704613	0.0244467	132	24	0.00463796	0.0681422
f__Enterobacteriaceae.g__Klebsiella	Vaginal	-0.13737	-0.13737	0.046681	132	71	0.00386854	0.0681422
f__Bacteroidales_unclassified.g__Phocaeicola	Vaginal	0.132582	0.132582	0.0510938	132	54	0.0105754	0.112805
f__Lachnospiraceae.g__Mediterraneibacter	visit_age_mo	0.0230428	0.0230428	0.00932945	132	36	0.0148423	0.132153
f__Enterobacteriaceae.g__Escherichia	probiotics_firstyr	-0.0943959	-0.0943959	0.0383354	132	88	0.0151426	0.132153
f__Enterobacteriaceae.g__Citrobacter	probiotics_firstyr	0.0301471	0.0301471	0.012782	132	24	0.0198721	0.158976
f__Propionibacteriaceae.g__Cutibacterium	probiotics_firstyr	0.0126816	0.0126816	0.00546035	132	27	0.0217972	0.160964
f__Veillonellaceae.g__Veillonella	Vaginal	-0.0871357	-0.0871357	0.0396972	132	94	0.0299805	0.205581
f__Lactobacillaceae.g__Lacticaseibacillus	probiotics_firstyr	0.0241025	0.0241025	0.0118713	132	48	0.044412	0.284237

## Sheet: Resolved - genus level
feature	value	coef	coef (abs)	stderr	N	N.not.0	pval	qval
f__Ruminococcaceae.g__Faecalibacterium	visit_age_mo	0.0310662	0.0310662	0.00630533	140	17	2.4037e-06	0.000317289
f__Lachnospiraceae.g__Anaerostipes	visit_age_mo	0.0281609	0.0281609	0.00611339	140	50	9.36881e-06	0.000618342
f__Enterobacteriaceae.g__Klebsiella	Vaginal	-0.115057	-0.115057	0.0291405	140	93	0.000126097	0.00554826
f__Enterobacteriaceae.g__Klebsiella	visit_age_mo	-0.0449681	-0.0449681	0.0139499	140	93	0.00158776	0.0523959
f__Pasteurellaceae.g__Haemophilus	Vaginal	-0.037167	-0.037167	0.0122587	140	84	0.00291453	0.0769436
f__Bacteroidales_unclassified.g__Phocaeicola	Vaginal	0.127937	0.127937	0.0452507	140	63	0.00540907	0.115385
f__Tannerellaceae.g__Parabacteroides	Vaginal	0.105698	0.105698	0.0379498	140	38	0.00611889	0.115385
f__Lachnospiraceae.g__Enterocloster	visit_age_mo	0.0165096	0.0165096	0.00622998	140	57	0.00900982	0.148662
f__Lachnospiraceae.g__Tyzzerella	visit_age_mo	0.0204274	0.0204274	0.00784742	140	44	0.0102723	0.15066
f__Lactobacillaceae.g__Lacticaseibacillus	probiotics_firstyr	0.0314718	0.0314718	0.0123932	140	87	0.0122367	0.161525
f__Clostridiaceae.g__Clostridium	Vaginal	-0.0642451	-0.0642451	0.0263593	140	108	0.0160997	0.169712
f__Lachnospiraceae.g__Sellimonas	Resolved	0.0193788	0.0193788	0.00796085	140	26	0.0162288	0.169712
f__Veillonellaceae.g__Veillonella	Vaginal	-0.0629249	-0.0629249	0.0259687	140	122	0.0167141	0.169712
f__Lachnospiraceae.g__Tyzzerella	Resolved	0.048244	0.048244	0.0201508	140	44	0.0180331	0.170026
f__Enterococcaceae.g__Enterococcus	Vaginal	-0.0248843	-0.0248843	0.010835	140	101	0.0231773	0.203961
f__Actinomycetaceae.g__Actinomyces	visit_age_mo	-0.0137174	-0.0137174	0.00654141	140	66	0.0378575	0.239559
f__Bifidobacteriaceae.g__Bifidobacterium	visit_age_mo	0.0747838	0.0747838	0.0346028	140	116	0.0324438	0.239559
f__Bacteroidaceae.g__Bacteroides	Resolved	-0.146392	-0.146392	0.0705044	140	78	0.0397583	0.239559
f__Bacteroidaceae.g__Bacteroides	Vaginal	0.117812	0.117812	0.0573556	140	78	0.0418999	0.239559
f__Clostridia_unclassified.g__Clostridia_unclassified	Resolved	0.0260623	0.0260623	0.0122528	140	56	0.0352343	0.239559
f__Clostridia_unclassified.g__Clostridia_unclassified	probiotics_firstyr	-0.0126716	-0.0126716	0.00612797	140	56	0.0405657	0.239559
f__Lachnospiraceae.g__Sellimonas	probiotics_firstyr	-0.00864334	-0.00864334	0.00398145	140	26	0.031687	0.239559
f__Peptostreptococcaceae.g__Intestinibacter	visit_age_mo	0.00582967	0.00582967	0.00271448	140	60	0.0335299	0.239559
f__Enterobacteriaceae.g__Citrobacter	Vaginal	-0.0383581	-0.0383581	0.0188263	140	48	0.0435563	0.239559
f__Actinomycetaceae.g__Actinomyces	Resolved	0.0321564	0.0321564	0.0167972	140	66	0.0576858	0.295458
f__Eggerthellaceae.g__Eggerthella	visit_age_mo	0.00702206	0.00702206	0.00367561	140	86	0.0581962	0.295458
