# Supplementary material for: Strain-Level microbial signatures and inferred functional alterations in infants with Food Protein-Induced Allergic Proctocolitis
Source: Research Square preprint supplement (doi:10.21203/rs.3.rs-7112201/v1), 2025-08-27
Supplement: Supplementary file 5 [file 5d29447a229a2776ead67094.xlsx]

## Sheet: all - genus level
Feature	Mean_Abs_SHAP	Median_SHAP
f Lachnospiraceae.g Enterocloster	0.0216921	0.0123363
f Enterobacteriaceae.g Klebsiella	0.0216169	0.00787043
f Oscillospiraceae.g Dysosmobacter	0.0151542	-0.0071887
f Enterococcaceae.g Enterococcus	0.0147098	0.00623842
f Bifidobacteriaceae.g Bifidobacterium	0.014073	0.00112317
f Lachnospiraceae.g Blautia	0.0139323	0.00739924
f Veillonellaceae.g Veillonella	0.0131027	0.0058733
f Actinomycetaceae.g Actinomyces	0.0122539	-0.00486464
f Staphylococcaceae.g Staphylococcus	0.0118254	0.00638492
f Enterobacteriaceae.g Escherichia	0.011531	0.00499925
f Streptococcaceae.g Streptococcus	0.0107584	0.00415926
f Ruminococcaceae.g Ruthenibacterium	0.0100746	-0.00407962
f Clostridiaceae.g Clostridium	0.00988281	0.00241518
f Peptostreptococcaceae.g Clostridioides	0.00840459	0.00486281
f Micrococcaceae.g Rothia	0.00812437	-0.00228404
f Ruminococcaceae.g Flavonifractor	0.00725623	-0.00176717
f Bacteroidaceae.g Bacteroides	0.0071373	0.0027746
f Tannerellaceae.g Parabacteroides	0.00664659	0.00373411
f Lachnospiraceae.g Lachnospiraceae unclassified	0.0061772	-0.00242341
f Pasteurellaceae.g Haemophilus	0.00590033	0.00353851

## Sheet: <4 - genus level
Feature	Mean_Abs_SHAP	Median_SHAP
f Enterobacteriaceae.g Klebsiella	0.0478863	0.0225145
f Enterococcaceae.g Enterococcus	0.0259704	0.00607761
f Staphylococcaceae.g Staphylococcus	0.0206569	0.0106813
f Bifidobacteriaceae.g Bifidobacterium	0.0159127	-7.69565e-05
f Lachnospiraceae.g Blautia	0.014701	0.00833507
f Tannerellaceae.g Parabacteroides	0.0146585	0.00741117
f Streptococcaceae.g Streptococcus	0.0135929	0.00539834
f Micrococcaceae.g Rothia	0.0127441	-0.00288775
f Veillonellaceae.g Veillonella	0.0120913	0.00384997
f Rikenellaceae.g Alistipes	0.0107064	0.00657817
f Pasteurellaceae.g Haemophilus	0.0106069	0.00329196
f Actinomycetaceae.g Actinomyces	0.0105263	-0.00544469
f Corynebacteriaceae.g Corynebacterium	0.0105064	0.00509152
f Bacteroidaceae.g Bacteroides	0.0101995	0.00151558
f Enterobacteriaceae.g Escherichia	0.00950212	-0.000260096
f Clostridiaceae.g Clostridium	0.00897243	0.00232334
f Acidaminococcaceae.g Phascolarctobacterium	0.00853315	0.00458391
f Lachnospiraceae.g Enterocloster	0.00811395	0.00490372
f Peptostreptococcaceae.g Clostridioides	0.00786002	0.00402405
f Propionibacteriaceae.g Cutibacterium	0.00631875	0.00323773

## Sheet: >6 - genus level
Feature	Mean_Abs_SHAP	Median_SHAP
f Streptococcaceae.g Streptococcus	0.0383569	0.0153835
f Lachnospiraceae.g Enterocloster	0.0294417	-0.00557192
f Ruminococcaceae.g Ruthenibacterium	0.0290355	-0.0121409
f Oscillospiraceae.g Dysosmobacter	0.0184361	-0.00878217
f Enterobacteriaceae.g Escherichia	0.0163314	0.0102234
f Actinomycetaceae.g Actinomyces	0.0132692	-0.00348322
f Erysipelotrichaceae.g Erysipelatoclostridium	0.0128988	-0.000969747
f Peptostreptococcaceae.g Intestinibacter	0.0127196	-0.0046717
f Pasteurellaceae.g Haemophilus	0.01148	0.00480067
f Enterobacteriaceae.g Citrobacter	0.0110047	0.00714247
f Ruminococcaceae.g Flavonifractor	0.0107154	-0.00102851
f Akkermansiaceae.g Akkermansia	0.00996855	-0.00398244
f Lachnospiraceae.g Lachnospiraceae unclassified	0.00973626	-0.00389403
f Veillonellaceae.g Veillonella	0.0089249	0.00265233
f Lachnospiraceae.g Tyzzerella	0.0088308	-0.00242594
f Eggerthellaceae.g Gordonibacter	0.00823968	-0.00381132
f Ruminococcaceae.g Faecalibacterium	0.0082391	0.00435063
f Clostridiaceae.g Clostridium	0.00767733	0.000393186
f Lachnospiraceae.g Mediterraneibacter	0.00756365	0.00166704
f Enterobacteriaceae.g Klebsiella	0.00742841	-0.00146274

## Sheet: all - speceis level
Feature	Mean_Abs_SHAP	Median_SHAP
Streptococcus thermophilus	0.0196588	0.011822
Dysosmobacter welbionis	0.0178518	-0.00856866
Staphylococcus epidermidis	0.014193	0.00733856
Enterococcus faecalis	0.0141443	0.00859939
Enterocloster clostridioformis	0.012716	0.00737002
Bifidobacterium longum	0.0115074	2.45306e-05
Bifidobacterium bifidum	0.00931773	-0.004654
Ruthenibacterium lactatiformans	0.00903654	-0.00399828
Rothia mucilaginosa	0.00840424	-0.00338934
Escherichia coli	0.00835186	0.00282677
Bacteroides caccae	0.00821941	-0.00337725
Flavonifractor plautii	0.00783978	-0.00244361
Klebsiella pneumoniae	0.00755642	0.00382875
Parabacteroides merdae	0.00748076	0.00479541
Veillonella parvula	0.00746494	0.00428651
Alistipes onderdonkii	0.00691396	0.00355881
Streptococcus salivarius	0.00681941	-0.000576897
Bacteroides thetaiotaomicron	0.00630196	0.00356798
Blautia wexlerae	0.00619948	0.00281782
Klebsiella grimontii	0.00609857	0.00287739

## Sheet: <4 - speceis level
Feature	Mean_Abs_SHAP	Median_SHAP
Enterococcus faecalis	0.0328996	0.0130752
Staphylococcus epidermidis	0.0219598	0.0133712
Rothia mucilaginosa	0.0174047	-0.0071263
Klebsiella pneumoniae	0.0174038	0.0095806
Bifidobacterium longum	0.0157673	-0.00608488
Enterocloster clostridioformis	0.0145773	0.00938084
Klebsiella grimontii	0.0140578	0.00822056
Alistipes onderdonkii	0.0128384	0.00689526
Streptococcus salivarius	0.0103021	0.000488532
Escherichia coli	0.0100592	-0.00291928
Bacteroides thetaiotaomicron	0.00998694	0.00589332
Clostridioides difficile	0.00874636	0.00451113
Veillonella parvula	0.00853769	0.00316025
Streptococcus parasanguinis	0.00832316	0.00454704
Clostridium paraputrificum	0.00764077	0.00451482
Haemophilus parainfluenzae	0.00760813	0.00342254
Phascolarctobacterium faecium	0.00744971	0.00412717
Clostridium perfringens	0.00717572	0.00383622
Bifidobacterium breve	0.00678156	-0.000879902
Parabacteroides merdae	0.00657414	0.00373992

## Sheet: >6 - species level
Feature	Mean_Abs_SHAP	Median_SHAP
Streptococcus thermophilus	0.0584542	0.0422315
Ruthenibacterium lactatiformans	0.0228858	-0.0111598
Escherichia coli	0.0160653	0.00988703
Dysosmobacter welbionis	0.0148811	-0.00680051
Akkermansia muciniphila	0.0120593	-0.00484395
Enterocloster aldensis	0.0104962	0.00584711
Tyzzerella nexilis	0.00987217	-0.00225854
Intestinibacter bartlettii	0.00974664	-0.00377787
Flavonifractor plautii	0.00930887	-0.000167726
Bifidobacterium bifidum	0.00897206	-0.00296565
Erysipelatoclostridium ramosum	0.00894326	0.00148785
Haemophilus parainfluenzae	0.00883308	0.00304477
Lachnospiraceae bacterium	0.00723527	-0.00343928
Streptococcus mitis	0.00693129	-0.00320681
Clostridia bacterium	0.00671101	-0.00206652
Streptococcus parasanguinis	0.00630695	0.000476311
Enterococcus gallinarum	0.00622609	0.00392502
Clostridium sp C5 48	0.00603556	0.00292689
Bifidobacterium catenulatum	0.00587676	0.00422695
Veillonella dispar	0.00585094	0.00129414
