# Supplementary material for: Strain-Level microbial signatures and inferred functional alterations in infants with Food Protein-Induced Allergic Proctocolitis
Source: Research Square preprint supplement (doi:10.21203/rs.3.rs-7112201/v1), 2025-08-27
Supplement: Supplementary file 6 [file 6545519236438cf5109ebba2.xlsx]

## Sheet: all - genus level
Feature	Mean_Abs_SHAP	Median_SHAP
f Lactobacillaceae.g Lacticaseibacillus	0.0755443	-0.0305451
f Enterobacteriaceae.g Klebsiella	0.0249909	0.00577937
f Oscillospiraceae.g Dysosmobacter	0.0186789	-0.00894526
f Lachnospiraceae.g Enterocloster	0.0167204	0.00957893
f Enterococcaceae.g Enterococcus	0.0154161	0.00519657
f Lachnospiraceae.g Blautia	0.0134829	0.00787294
f Veillonellaceae.g Veillonella	0.0123312	0.00522664
f Streptococcaceae.g Streptococcus	0.0103607	0.00376223
f Clostridiaceae.g Clostridium	0.0092131	0.00287834
f Bifidobacteriaceae.g Bifidobacterium	0.00899699	0.00165045
f Actinomycetaceae.g Actinomyces	0.00815553	-0.00274488
f Enterobacteriaceae.g Escherichia	0.00814751	0.0026863
f Staphylococcaceae.g Staphylococcus	0.00795493	0.0040885
f Ruminococcaceae.g Ruthenibacterium	0.00787963	-0.00316584
f Bacteroidaceae.g Bacteroides	0.00692093	0.00286667
f Lachnospiraceae.g Lachnospiraceae unclassified	0.00688923	-0.00264215
f Peptostreptococcaceae.g Clostridioides	0.00688148	0.00397661
f Micrococcaceae.g Rothia	0.00651555	-0.00142242
f Eggerthellaceae.g Eggerthella	0.00584978	0.00226766
f Lachnospiraceae.g Mediterraneibacter	0.00581792	0.00329393

## Sheet: <4 - genus level
Feature	Mean_Abs_SHAP	Median_SHAP
f Lactobacillaceae.g Lacticaseibacillus	0.0573188	-0.0327846
f Enterobacteriaceae.g Klebsiella	0.0446918	0.021793
f Enterococcaceae.g Enterococcus	0.0235062	0.00416435
f Bifidobacteriaceae.g Bifidobacterium	0.0157068	-0.000797333
f Staphylococcaceae.g Staphylococcus	0.0147267	0.00784512
f Micrococcaceae.g Rothia	0.0138215	-0.00313326
f Lachnospiraceae.g Blautia	0.0136539	0.00795799
f Tannerellaceae.g Parabacteroides	0.0129337	0.00637911
f Veillonellaceae.g Veillonella	0.0118313	0.00293415
f Streptococcaceae.g Streptococcus	0.0115908	0.00371931
f Rikenellaceae.g Alistipes	0.0102644	0.00611883
f Enterobacteriaceae.g Escherichia	0.0100438	-0.000952899
f Pasteurellaceae.g Haemophilus	0.00989372	0.00227251
f Corynebacteriaceae.g Corynebacterium	0.00972696	0.00450457
f Bacteroidaceae.g Bacteroides	0.00935223	0.00106543
f Clostridiaceae.g Clostridium	0.00863202	0.001912
f Peptostreptococcaceae.g Clostridioides	0.00827028	0.00497755
f Actinomycetaceae.g Actinomyces	0.00745703	-0.00377236
f Acidaminococcaceae.g Phascolarctobacterium	0.00745159	0.00386481
f Propionibacteriaceae.g Cutibacterium	0.00667411	0.00337631

## Sheet: >6 - genus level
Transition	P_Value
0 to 0.5	0.935927
0.5 to 1	0.0223947
1 to 2	0.72536
2 to 4	0.0453801
4 to 6	0.269336
6 to 9	0.0514011
9 to 12	0.323277

## Sheet: all - speceis level
Feature	Mean_Abs_SHAP	Median_SHAP
Lacticaseibacillus rhamnosus	0.0648154	-0.0345365
Streptococcus thermophilus	0.0227018	0.0136989
Dysosmobacter welbionis	0.0157771	-0.00730259
Enterococcus faecalis	0.0153012	0.00955972
Staphylococcus epidermidis	0.0100004	0.00512731
Enterocloster clostridioformis	0.00991495	0.00573517
Klebsiella pneumoniae	0.00943038	0.00481724
Bifidobacterium longum	0.00871727	-0.000272255
Escherichia coli	0.0083638	0.00195077
Veillonella parvula	0.00826645	0.00454642
Bifidobacterium bifidum	0.00808953	-0.0035939
Rothia mucilaginosa	0.00775374	-0.00297616
Lacticaseibacillus paracasei	0.00755989	-0.00316212
Ruthenibacterium lactatiformans	0.00748248	-0.00308956
Streptococcus salivarius	0.00716873	-0.00101292
Flavonifractor plautii	0.00696431	-0.00221343
Klebsiella grimontii	0.00676922	0.00361279
Bacteroides caccae	0.00627912	-0.00282179
Alistipes onderdonkii	0.00584104	0.00310419
Streptococcus parasanguinis	0.0058401	0.0033143

## Sheet: <4 - speceis level
Feature	Mean_Abs_SHAP	Median_SHAP
Lacticaseibacillus rhamnosus	0.0556048	-0.0353645
Enterococcus faecalis	0.0347136	0.0109084
Staphylococcus epidermidis	0.017376	0.0103138
Rothia mucilaginosa	0.0159598	-0.00636995
Klebsiella pneumoniae	0.0150343	0.00821318
Bifidobacterium longum	0.0135183	-0.00483783
Klebsiella grimontii	0.012967	0.00848031
Enterocloster clostridioformis	0.0110525	0.00638433
Streptococcus salivarius	0.0110362	0.000644504
Alistipes onderdonkii	0.0106392	0.00608652
Escherichia coli	0.00825168	-0.00231113
Clostridium perfringens	0.00810286	0.00427751
Streptococcus parasanguinis	0.00788766	0.00401321
Clostridium paraputrificum	0.00769456	0.00434451
Veillonella parvula	0.00768047	0.00290534
Bacteroides thetaiotaomicron	0.00749007	0.00396874
Haemophilus parainfluenzae	0.00707013	0.00245606
Phascolarctobacterium faecium	0.0067112	0.00330328
Blautia wexlerae	0.00667427	0.00384331
Parabacteroides merdae	0.00659601	0.00355118

## Sheet: >6 - species level
Feature	Mean_Abs_SHAP	Median_SHAP
Streptococcus thermophilus	0.0603009	0.0443738
Lacticaseibacillus rhamnosus	0.0303321	-0.00926048
Ruthenibacterium lactatiformans	0.0256821	-0.0118043
Dysosmobacter welbionis	0.0237002	-0.0121914
Escherichia coli	0.0177822	0.0102773
Lacticaseibacillus paracasei	0.0114351	-0.00450841
Haemophilus parainfluenzae	0.00956168	0.00411413
Akkermansia muciniphila	0.00933329	-0.00390639
Flavonifractor plautii	0.00787661	0.000575244
Tyzzerella nexilis	0.00755593	-0.00262727
Intestinibacter bartlettii	0.007387	-0.00236496
Clostridia bacterium	0.00733119	-0.00207794
Erysipelatoclostridium ramosum	0.00731733	0.0017084
Bifidobacterium bifidum	0.00725509	-0.00163869
Enterocloster aldensis	0.00711008	0.00331433
Lachnospiraceae bacterium	0.00688381	-0.00314598
Clostridium sp C5 48	0.00647921	0.00433633
Veillonella parvula	0.00622154	0.00377503
Bifidobacterium breve	0.00603823	0.00256471
Veillonella dispar	0.00580947	0.00144519
