# Supplementary material for: Strain-Level microbial signatures and inferred functional alterations in infants with Food Protein-Induced Allergic Proctocolitis
Source: Research Square preprint supplement (doi:10.21203/rs.3.rs-7112201/v1), 2025-08-27
Supplement: Supplementary file 7 [file 98e9382ad43e9be481de08ae.xlsx]

## Sheet: all_samples
feature	metadata	value	coef	absolute coef	stderr	N	N.not.0	pval	qval	Pathway.ID	SCFA-association
PWY-7858...5Z..dodecenoate.biosynthesis.II	visit_age_mo	visit_age_mo	-0.00248753	0.00248753	0.000171239	740	663	3.22897e-42	5.54091e-39
PWY-.1297..superpathway.of.purine.deoxyribonucleosides.degradation	visit_age_mo	visit_age_mo	-0.0020999	0.0020999	0.000166693	740	728	4.36363e-33	3.74399e-30
PWY-7187..pyrimidine.deoxyribonucleotides.de.novo.biosynthesis.II	visit_age_mo	visit_age_mo	-0.0018557	0.0018557	0.000150811	740	628	9.00799e-32	5.15257e-29
SO4ASSIM.PWY-.assimilatory.sulfate.reduction.I	visit_age_mo	visit_age_mo	-0.00231695	0.00231695	0.000190065	740	695	2.91006e-31	1.24842e-28
PWY-5837..2.carboxy.1.4.naphthoquinol.biosynthesis	visit_age_mo	visit_age_mo	-0.00192866	0.00192866	0.000161286	740	697	3.07079e-30	1.0539e-27
NAD.BIOSYNTHESIS.II..NAD.salvage.pathway.III..to.nicotinamide.riboside.	visit_age_mo	visit_age_mo	-0.00155322	0.00155322	0.000130676	740	638	6.33452e-30	1.81167e-27
PWY-5855..ubiquinol.7.biosynthesis..early.decarboxylation.	visit_age_mo	visit_age_mo	-0.00156374	0.00156374	0.000134041	740	571	5.68384e-29	1.39335e-26
PWY-5913..partial.TCA.cycle..obligate.autotrophs.	visit_age_mo	visit_age_mo	-0.00225626	0.00225626	0.00019568	740	701	2.17219e-28	4.65935e-26
PWY-5505..L.glutamate.and.L.glutamine.biosynthesis	visit_age_mo	visit_age_mo	0.00112152	0.00112152	9.78763e-05	740	370	4.39258e-28	8.37518e-26
PWY-5138..fatty.acid..beta..oxidation.IV..unsaturated..even.number.	visit_age_mo	visit_age_mo	-0.00195956	0.00195956	0.000171788	740	625	7.2881e-28	1.25064e-25
PWY-.1337..oleate..beta..oxidation	visit_age_mo	visit_age_mo	-0.00180224	0.00180224	0.000158995	740	542	1.46401e-27	2.28386e-25
PWY-ZNC.1..assimilatory.sulfate.reduction.IV	visit_age_mo	visit_age_mo	-0.00181185	0.00181185	0.000160123	740	663	1.77628e-27	2.54008e-25
PWY-.301..L.ascorbate.degradation.I..bacterial..anaerobic.	visit_age_mo	visit_age_mo	-0.00223205	0.00223205	0.000197875	740	688	2.49928e-27	3.29905e-25
PWY-7094..fatty.acid.salvage	visit_age_mo	visit_age_mo	-0.0017688	0.0017688	0.000156973	740	548	2.80617e-27	3.43956e-25
DENOVOPURINE2.PWY-.superpathway.of.purine.nucleotides.de.novo.biosynthesis.II	visit_age_mo	visit_age_mo	-0.0020769	0.0020769	0.000184516	740	632	3.15814e-27	3.61292e-25
PWY-5022..4.aminobutanoate.degradation.V	visit_age_mo	visit_age_mo	0.00123588	0.00123588	0.000111012	740	284	1.03491e-26	1.10994e-24	PWY-5022	SCFA
PWY-7883..anhydromuropeptides.recycling.II	visit_age_mo	visit_age_mo	-0.00165102	0.00165102	0.000148478	740	626	1.17471e-26	1.18577e-24
HOMOSER.METSYN.PWY-.L.methionine.biosynthesis.I	visit_age_mo	visit_age_mo	-0.00200992	0.00200992	0.000181193	740	688	1.52045e-26	1.37492e-24
SULFATE.CYS.PWY-.superpathway.of.sulfate.assimilation.and.cysteine.biosynthesis	visit_age_mo	visit_age_mo	-0.00194677	0.00194677	0.000175502	740	694	1.52235e-26	1.37492e-24
PWY-5347..superpathway.of.L.methionine.biosynthesis..transsulfuration.	visit_age_mo	visit_age_mo	-0.00219871	0.00219871	0.000201646	740	688	9.18175e-26	7.87794e-24
METSYN.PWY-.superpathway.of.L.homoserine.and.L.methionine.biosynthesis	visit_age_mo	visit_age_mo	-0.00216891	0.00216891	0.000199181	740	688	1.05481e-25	8.61931e-24
FAO.PWY-.fatty.acid..beta..oxidation.I..generic.	visit_age_mo	visit_age_mo	-0.00229922	0.00229922	0.000213107	740	634	2.71003e-25	2.11382e-23
FERMENTATION.PWY-.mixed.acid.fermentation	visit_age_mo	visit_age_mo	-0.00224231	0.00224231	0.000208196	740	692	3.23355e-25	2.31199e-23	FERMENTATION-PWY	SCFA
PWY-5981..CDP.diacylglycerol.biosynthesis.III	visit_age_mo	visit_age_mo	-0.00165486	0.00165486	0.000153606	740	678	3.13674e-25	2.31199e-23
HEME.BIOSYNTHESIS.II.1..heme.b.biosynthesis.V..aerobic.	visit_age_mo	visit_age_mo	-0.00187189	0.00187189	0.000174637	740	689	5.23738e-25	3.59494e-23
MET.SAM.PWY-.superpathway.of.S.adenosyl.L.methionine.biosynthesis	visit_age_mo	visit_age_mo	-0.00206597	0.00206597	0.000192981	740	688	5.92287e-25	3.9091e-23
HEME.BIOSYNTHESIS.II..heme.b.biosynthesis.I..aerobic.	visit_age_mo	visit_age_mo	-0.00181058	0.00181058	0.000169205	740	709	6.20924e-25	3.94632e-23
AST.PWY-.L.arginine.degradation.II..AST.pathway.	visit_age_mo	visit_age_mo	-0.00166892	0.00166892	0.000157584	740	603	1.72558e-24	1.02107e-22
PWY-6.409..superpathway.of.purine.nucleotide.salvage	visit_age_mo	visit_age_mo	-0.00185416	0.00185416	0.00017503	740	700	1.68199e-24	1.02107e-22
PWY-.1298..superpathway.of.pyrimidine.deoxyribonucleosides.degradation	visit_age_mo	visit_age_mo	-0.00167332	0.00167332	0.000158088	740	727	1.82284e-24	1.04266e-22
PWY-5897..superpathway.of.menaquinol.11.biosynthesis	visit_age_mo	visit_age_mo	-0.00166047	0.00166047	0.000157189	740	696	2.21694e-24	1.15281e-22
PWY-5898..superpathway.of.menaquinol.12.biosynthesis	visit_age_mo	visit_age_mo	-0.00166047	0.00166047	0.000157189	740	696	2.21694e-24	1.15281e-22
PWY-5899..superpathway.of.menaquinol.13.biosynthesis	visit_age_mo	visit_age_mo	-0.00166047	0.00166047	0.000157189	740	696	2.21694e-24	1.15281e-22
PWY-6590..superpathway.of.Clostridium.acetobutylicum.acidogenic.fermentation	visit_age_mo	visit_age_mo	0.00115358	0.00115358	0.000111	740	353	1.06808e-23	5.39065e-22
HEMESYN2.PWY-.heme.b.biosynthesis.II..oxygen.independent.	visit_age_mo	visit_age_mo	-0.00187072	0.00187072	0.000181626	740	719	2.48774e-23	1.21971e-21
CENTFERM.PWY-.pyruvate.fermentation.to.butanoate	visit_age_mo	visit_age_mo	0.00101865	0.00101865	9.95633e-05	740	353	4.63538e-23	2.18018e-21	CENTFERM-PWY	SCFA
PWY-7315..dTDP.N.acetylthomosamine.biosynthesis	visit_age_mo	visit_age_mo	-0.00160455	0.00160455	0.000156853	740	632	4.70085e-23	2.18018e-21
PWY-5918..superpathway.of.heme.b.biosynthesis.from.glutamate	visit_age_mo	visit_age_mo	-0.00165468	0.00165468	0.000164303	740	684	1.95731e-22	8.83878e-21
FASYN.ELONG.PWY-.fatty.acid.elongation....saturated	visit_age_mo	visit_age_mo	-0.00174806	0.00174806	0.000174263	740	726	2.79074e-22	1.22793e-20
PWY-.1338..polymyxin.resistance	visit_age_mo	visit_age_mo	-0.00149856	0.00149856	0.000149894	740	580	3.76559e-22	1.61544e-20
PWY-6282..palmitoleate.biosynthesis.I..from..5Z..dodec.5.enoate.	visit_age_mo	visit_age_mo	-0.00171287	0.00171287	0.000174403	740	726	1.78247e-21	7.46031e-20
PWY-.862...5Z..dodecenoate.biosynthesis.I	visit_age_mo	visit_age_mo	-0.00165053	0.00165053	0.00016906	740	729	2.97241e-21	1.21444e-19
PWY-2942..L.lysine.biosynthesis.III	visit_age_mo	visit_age_mo	0.00217819	0.00217819	0.000223581	740	688	3.55963e-21	1.42054e-19
PWY-7664..oleate.biosynthesis.IV..anaerobic.	visit_age_mo	visit_age_mo	-0.00168822	0.00168822	0.000173631	740	726	4.2089e-21	1.64147e-19
PWY-5861..superpathway.of.demethylmenaquinol.8.biosynthesis.I	visit_age_mo	visit_age_mo	-0.0016026	0.0016026	0.000168386	740	663	2.48489e-20	9.47572e-19
PWY-5189..tetrapyrrole.biosynthesis.II..from.glycine.	visit_age_mo	visit_age_mo	-0.00159508	0.00159508	0.000168999	740	663	4.87565e-20	1.7893e-18
PWY-5840..superpathway.of.menaquinol.7.biosynthesis	visit_age_mo	visit_age_mo	-0.00155734	0.00155734	0.00016501	740	664	4.90076e-20	1.7893e-18
PWY-5675..nitrate.reduction.V..assimilatory.	visit_age_mo	visit_age_mo	-0.00180179	0.00180179	0.000193673	740	630	1.53082e-19	5.47269e-18
PWY-5860..superpathway.of.demethylmenaquinol.6.biosynthesis.I	visit_age_mo	visit_age_mo	-0.00170896	0.00170896	0.000183998	740	584	1.74172e-19	6.09958e-18
ORNDEG.PWY-.superpathway.of.ornithine.degradation	visit_age_mo	visit_age_mo	-0.00204587	0.00204587	0.000221302	740	637	2.50375e-19	8.59286e-18
METHGLYUT.PWY-.superpathway.of.methylglyoxal.degradation	visit_age_mo	visit_age_mo	-0.0010897	0.0010897	0.000118053	740	603	2.81752e-19	9.48013e-18
PWY-.1415..superpathway.of.heme.b.biosynthesis.from.uroporphyrinogen.III	visit_age_mo	visit_age_mo	-0.00166209	0.00166209	0.000180201	740	652	2.98733e-19	9.85817e-18
PWY-7118..chitin.deacetylation	visit_age_mo	visit_age_mo	-0.00170396	0.00170396	0.000185661	740	655	4.37716e-19	1.41721e-17
PPGPPMET.PWY-.ppGpp.metabolism	visit_age_mo	visit_age_mo	-0.00164915	0.00164915	0.000179904	740	596	4.79637e-19	1.52418e-17
PWY-.1586..peptidoglycan.maturation..meso.diaminopimelate.containing.	visit_age_mo	visit_age_mo	-0.00208645	0.00208645	0.000228911	740	738	7.39351e-19	2.30677e-17
PWY-5723..Rubisco.shunt	visit_age_mo	visit_age_mo	-0.00205001	0.00205001	0.000226297	740	655	1.17235e-18	3.59241e-17
PWY-.1479..tRNA.processing	visit_age_mo	visit_age_mo	-0.00163548	0.00163548	0.000181189	740	679	1.53269e-18	4.61421e-17
METH.ACETATE.PWY-.methanogenesis.from.acetate	visit_age_mo	visit_age_mo	0.00113831	0.00113831	0.000126766	740	250	2.25049e-18	6.65835e-17	METH-ACETATE-PWY	Acetate
PWY-7234..inosine.5..phosphate.biosynthesis.III	visit_age_mo	visit_age_mo	-0.00152337	0.00152337	0.000170405	740	720	3.11791e-18	9.06835e-17
ECASYN.PWY-.enterobacterial.common.antigen.biosynthesis	visit_age_mo	visit_age_mo	-0.00128609	0.00128609	0.0001449	740	514	5.24816e-18	1.48727e-16
GLYOXYLATE.BYPASS..glyoxylate.cycle	visit_age_mo	visit_age_mo	-0.00163837	0.00163837	0.000184609	740	657	5.28692e-18	1.48727e-16
PWY-.1297..superpathway.of.purine.deoxyribonucleosides.degradation	mode_of_delivery	Vaginal	-0.00318988	0.00318988	0.000359594	740	728	5.46109e-18	1.51149e-16
PWY-5850..superpathway.of.menaquinol.6.biosynthesis	visit_age_mo	visit_age_mo	-0.00171109	0.00171109	0.000193231	740	584	6.19986e-18	1.66234e-16
PWY-5896..superpathway.of.menaquinol.10.biosynthesis	visit_age_mo	visit_age_mo	-0.00171109	0.00171109	0.000193231	740	584	6.19986e-18	1.66234e-16
P161.PWY-.acetylene.degradation..anaerobic.	visit_age_mo	visit_age_mo	-0.00171268	0.00171268	0.000194073	740	706	7.9171e-18	2.09011e-16	P161-PWY	SCFA
NONOXIPENT.PWY-.pentose.phosphate.pathway..non.oxidative.branch..I	visit_age_mo	visit_age_mo	-0.0017008	0.0017008	0.000193075	740	737	9.00254e-18	2.34066e-16
PWY-7200..superpathway.of.pyrimidine.deoxyribonucleoside.salvage	visit_age_mo	visit_age_mo	-0.000744613	0.000744613	8.4634e-05	740	106	9.83601e-18	2.51919e-16
PWY-5136..fatty.acid..beta..oxidation.II..plant.peroxisome.	visit_age_mo	visit_age_mo	-0.00184241	0.00184241	0.000209873	740	695	1.14934e-17	2.85835e-16
PWY-5838..superpathway.of.menaquinol.8.biosynthesis.I	visit_age_mo	visit_age_mo	-0.0015305	0.0015305	0.000174324	740	663	1.14074e-17	2.85835e-16
THISYNARA.PWY-.superpathway.of.thiamine.diphosphate.biosynthesis.III..eukaryotes.	visit_age_mo	visit_age_mo	0.0015547	0.0015547	0.000179272	740	719	2.6944e-17	6.60514e-16
PWY-5367..petroselinate.biosynthesis	visit_age_mo	visit_age_mo	-0.00124646	0.00124646	0.000143827	740	590	2.82367e-17	6.82452e-16
POLYISOPRENSYN.PWY-.polyisoprenoid.biosynthesis..E..coli.	visit_age_mo	visit_age_mo	-0.00124868	0.00124868	0.000145513	740	717	5.54809e-17	1.32229e-15
PWY-.166..superpathway.of.pyrimidine.deoxyribonucleotides.de.novo.biosynthesis..E..coli.	visit_age_mo	visit_age_mo	-0.00140085	0.00140085	0.00016389	740	649	7.24181e-17	1.70232e-15
P461.PWY-.hexitol.fermentation.to.lactate..formate..ethanol.and.acetate	visit_age_mo	visit_age_mo	-0.00166974	0.00166974	0.000196312	740	712	1.00723e-16	2.33568e-15	P461-PWY	SCFA
GLYCOLYSIS.TCA.GLYOX.BYPASS..superpathway.of.glycolysis..pyruvate.dehydrogenase..TCA..and.glyoxylate.bypass	visit_age_mo	visit_age_mo	-0.00140012	0.00140012	0.000164996	740	414	1.17616e-16	2.69106e-15
PWY-.1261..anhydromuropeptides.recycling.I	visit_age_mo	visit_age_mo	-0.00144201	0.00144201	0.000170129	740	703	1.26951e-16	2.86642e-15
P4.PWY-.superpathway.of.L.lysine..L.threonine.and.L.methionine.biosynthesis.I	visit_age_mo	visit_age_mo	-0.00164269	0.00164269	0.000194602	740	669	1.66575e-16	3.71223e-15
GLUCARDEG.PWY-.D.glucarate.degradation.I	visit_age_mo	visit_age_mo	-0.0014595	0.0014595	0.000173157	740	667	1.83624e-16	4.03972e-15
PWY-5862..superpathway.of.demethylmenaquinol.9.biosynthesis	visit_age_mo	visit_age_mo	-0.00147381	0.00147381	0.00017609	740	622	2.90608e-16	6.31245e-15
PWY-6961..L.ascorbate.degradation.II..bacterial..aerobic.	visit_age_mo	visit_age_mo	-0.001661	0.001661	0.00019981	740	617	4.50598e-16	9.66533e-15
PWY-6284..superpathway.of.unsaturated.fatty.acids.biosynthesis..E..coli.	visit_age_mo	visit_age_mo	-0.00161723	0.00161723	0.000195305	740	589	5.77981e-16	1.22446e-14
PWY-7013...S..propane.1.2.diol.degradation	mode_of_delivery	Vaginal	-0.00466876	0.00466876	0.00056405	740	536	5.9292e-16	1.24079e-14	PWY-7013	SCFA
PWY-6803..phosphatidylcholine.acyl.editing	visit_age_mo	visit_age_mo	-0.00148018	0.00148018	0.000179144	740	670	6.63814e-16	1.37242e-14
PWY-5981..CDP.diacylglycerol.biosynthesis.III	mode_of_delivery	Vaginal	-0.00272643	0.00272643	0.000331362	740	678	8.64806e-16	1.76668e-14
PWY-.1477..ethanolamine.utilization	visit_age_mo	visit_age_mo	-0.00207729	0.00207729	0.000254115	740	727	1.29888e-15	2.6222e-14
P122.PWY-.heterolactic.fermentation	visit_age_mo	visit_age_mo	-0.0012461	0.0012461	0.000152753	740	583	1.47703e-15	2.94719e-14	P122-PWY	SCFA
PRPP.PWY-.superpathway.of.histidine..purine..and.pyrimidine.biosynthesis	visit_age_mo	visit_age_mo	-0.00152379	0.00152379	0.000187574	740	603	1.91086e-15	3.76901e-14
PWY-7196..superpathway.of.pyrimidine.ribonucleosides.salvage	visit_age_mo	visit_age_mo	0.000521106	0.000521106	6.42904e-05	740	111	2.1921e-15	4.2746e-14
PWY-5030..L.histidine.degradation.III	mode_of_delivery	Vaginal	0.00410066	0.00410066	0.000516243	740	431	7.38742e-15	1.42436e-13
PWY-5845..superpathway.of.menaquinol.9.biosynthesis	visit_age_mo	visit_age_mo	-0.00144977	0.00144977	0.000184184	740	622	1.25811e-14	2.39879e-13
PWY-6285..superpathway.of.fatty.acids.biosynthesis..E..coli.	visit_age_mo	visit_age_mo	-0.00171456	0.00171456	0.000219725	740	570	2.07497e-14	3.9128e-13
PWY-7391..isoprene.biosynthesis.II..engineered.	visit_age_mo	visit_age_mo	-0.000484379	0.000484379	6.24123e-05	740	154	2.82548e-14	5.27013e-13
P161.PWY-.acetylene.degradation..anaerobic.	mode_of_delivery	Vaginal	-0.00324756	0.00324756	0.000418658	740	706	2.90625e-14	5.3625e-13	P161-PWY	SCFA
PWY-5188..tetrapyrrole.biosynthesis.I..from.glutamate.	mode_of_delivery	Vaginal	-0.0030028	0.0030028	0.00038782	740	728	3.22573e-14	5.88866e-13
PWY-5677..succinate.fermentation.to.butanoate	visit_age_mo	visit_age_mo	0.000415865	0.000415865	5.37366e-05	740	159	3.31614e-14	5.98999e-13	PWY-5677	SCFA
PWY-6519..8.amino.7.oxononanoate.biosynthesis.I	visit_age_mo	visit_age_mo	-0.00140268	0.00140268	0.000181962	740	709	4.13305e-14	7.32957e-13
PWY-6823..molybdopterin.biosynthesis	mode_of_delivery	Vaginal	-0.00284488	0.00284488	0.000369068	740	728	4.14317e-14	7.32957e-13
PWY-6.399..gluconeogenesis.III	visit_age_mo	visit_age_mo	0.00114529	0.00114529	0.0001494	740	388	5.62705e-14	9.85307e-13
PWY-6876..isopropanol.biosynthesis..engineered.	visit_age_mo	visit_age_mo	0.000449857	0.000449857	5.90177e-05	740	159	7.69874e-14	1.33445e-12
TCA.GLYOX.BYPASS..superpathway.of.glyoxylate.bypass.and.TCA	visit_age_mo	visit_age_mo	-0.00161735	0.00161735	0.000213593	740	579	1.10392e-13	1.89433e-12
PWY-7383..anaerobic.energy.metabolism..invertebrates..cytosol.	visit_age_mo	visit_age_mo	0.00108758	0.00108758	0.000144534	740	404	1.547e-13	2.62837e-12
PWY-.1298..superpathway.of.pyrimidine.deoxyribonucleosides.degradation	mode_of_delivery	Vaginal	-0.0025647	0.0025647	0.000341031	740	727	1.59481e-13	2.68303e-12
PWY-4041...gamma..glutamyl.cycle	visit_age_mo	visit_age_mo	-0.00140466	0.00140466	0.000187772	740	733	2.11443e-13	3.52268e-12
PWY-561..superpathway.of.glyoxylate.cycle.and.fatty.acid.degradation	visit_age_mo	visit_age_mo	-0.00155398	0.00155398	0.000207982	740	584	2.25253e-13	3.68128e-12
PWY-8178..pentose.phosphate.pathway..non.oxidative.branch..II	visit_age_mo	visit_age_mo	-0.00134791	0.00134791	0.0001804	740	736	2.25074e-13	3.68128e-12
PPGPPMET.PWY-.ppGpp.metabolism	mode_of_delivery	Vaginal	-0.00289484	0.00289484	0.000388093	740	596	2.46121e-13	3.98438e-12
PWY-822..fructan.biosynthesis	visit_age_mo	visit_age_mo	-0.000658583	0.000658583	8.86097e-05	740	316	2.97114e-13	4.76493e-12
PWY-622..starch.biosynthesis	visit_age_mo	visit_age_mo	0.00195071	0.00195071	0.000263624	740	466	3.74132e-13	5.94454e-12
PWY-6549..L.glutamine.biosynthesis.III	visit_age_mo	visit_age_mo	0.000955707	0.000955707	0.000129403	740	422	4.12852e-13	6.49959e-12
PWY-5690..TCA.cycle.II..plants.and.fungi.	visit_age_mo	visit_age_mo	0.000570761	0.000570761	7.73634e-05	740	247	4.36121e-13	6.80349e-12
PWY-8187..L.arginine.degradation.XIII..reductive.Stickland.reaction.	visit_age_mo	visit_age_mo	-0.00131426	0.00131426	0.000178627	740	727	5.01828e-13	7.75799e-12
P441.PWY-.superpathway.of.N.acetylneuraminate.degradation	visit_age_mo	visit_age_mo	-0.00126161	0.00126161	0.000173167	740	707	8.27588e-13	1.26798e-11
PWY-5415..catechol.degradation.I..meta.cleavage.pathway.	visit_age_mo	visit_age_mo	-0.0004016	0.0004016	5.51797e-05	740	190	8.71704e-13	1.32376e-11
TCA..TCA.cycle.I..prokaryotic.	visit_age_mo	visit_age_mo	-0.00157118	0.00157118	0.000216306	740	596	9.62565e-13	1.44891e-11
PWY-6470..peptidoglycan.biosynthesis.V...beta..lactam.resistance.	visit_age_mo	visit_age_mo	0.000917363	0.000917363	0.000126524	740	272	1.05407e-12	1.57286e-11
PWY-8011..L.serine.biosynthesis.II	visit_age_mo	visit_age_mo	-0.000157867	0.000157867	2.18239e-05	740	56	1.1837e-12	1.75105e-11
PWY-7942..5.oxo.L.proline.metabolism	mode_of_delivery	Vaginal	-0.00245567	0.00245567	0.000341494	740	572	1.58652e-12	2.3269e-11
ECASYN.PWY-.enterobacterial.common.antigen.biosynthesis	mode_of_delivery	Vaginal	-0.00221754	0.00221754	0.000312581	740	514	3.06376e-12	4.44078e-11
PWY-.1477..ethanolamine.utilization	mode_of_delivery	Vaginal	-0.00388854	0.00388854	0.000548183	740	727	3.07956e-12	4.44078e-11
PWY-7942..5.oxo.L.proline.metabolism	visit_age_mo	visit_age_mo	-0.00112191	0.00112191	0.000158302	740	572	3.21527e-12	4.59783e-11
FASYN.INITIAL.PWY-.superpathway.of.fatty.acid.biosynthesis.initiation..E..coli.	visit_age_mo	visit_age_mo	0.00106859	0.00106859	0.000151043	740	364	3.49606e-12	4.95805e-11
PWY-922..mevalonate.pathway.I..eukaryotes.and.bacteria.	visit_age_mo	visit_age_mo	-0.000598985	0.000598985	8.46862e-05	740	335	3.53743e-12	4.9756e-11
PWY-7117..C4.photosynthetic.carbon.assimilation.cycle..PEPCK.type	visit_age_mo	visit_age_mo	-0.00136534	0.00136534	0.000193386	740	722	3.85687e-12	5.3808e-11
UNMAPPED	visit_age_mo	visit_age_mo	0.0247728	0.0247728	0.00351375	740	740	4.1241e-12	5.70175e-11
PWY-7115..C4.photosynthetic.carbon.assimilation.cycle..NAD.ME.type	visit_age_mo	visit_age_mo	-0.00113262	0.00113262	0.000160675	740	707	4.15337e-12	5.70175e-11
PWY-7204..pyridoxal.5..phosphate.salvage.II..plants.	visit_age_mo	visit_age_mo	-0.00114231	0.00114231	0.000162105	740	547	4.22159e-12	5.7494e-11
PWY-4984..urea.cycle	visit_age_mo	visit_age_mo	0.00141191	0.00141191	0.000201204	740	514	5.14435e-12	6.89665e-11
PWY-7456...beta...1.4..mannan.degradation	mode_of_delivery	Vaginal	0.00230285	0.00230285	0.000328128	740	322	5.11596e-12	6.89665e-11
P221.PWY-.octane.oxidation	visit_age_mo	visit_age_mo	-0.000672693	0.000672693	9.60278e-05	740	379	5.58007e-12	7.42279e-11
P221.PWY-.octane.oxidation	mode_of_delivery	Vaginal	-0.00144651	0.00144651	0.000207153	740	379	6.48053e-12	8.5543e-11
PWY-6969..TCA.cycle.V..2.oxoglutarate.synthase.	visit_age_mo	visit_age_mo	-0.00132573	0.00132573	0.000191595	740	655	9.87875e-12	1.29404e-10
PWY-5989..stearate.biosynthesis.II..bacteria.and.plants.	visit_age_mo	visit_age_mo	-0.00119222	0.00119222	0.000172664	740	724	1.08817e-11	1.41462e-10
PWY-.1241..ADP.L.glycero..beta..D.manno.heptose.biosynthesis	visit_age_mo	visit_age_mo	-0.00115888	0.00115888	0.000168072	740	706	1.16042e-11	1.49721e-10
PWY-7663..gondoate.biosynthesis..anaerobic.	visit_age_mo	visit_age_mo	-0.00103461	0.00103461	0.000150519	740	738	1.33706e-11	1.71224e-10
GALACTARDEG.PWY-.D.galactarate.degradation.I	visit_age_mo	visit_age_mo	-0.00142317	0.00142317	0.000208001	740	683	1.64479e-11	2.07534e-10
GLUCARGALACTSUPER.PWY-.superpathway.of.D.glucarate.and.D.galactarate.degradation	visit_age_mo	visit_age_mo	-0.00142317	0.00142317	0.000208001	740	683	1.64479e-11	2.07534e-10
GOLPDLCAT.PWY-.superpathway.of.glycerol.degradation.to.1.3.propanediol	mode_of_delivery	Vaginal	-0.00223084	0.00223084	0.000328548	740	548	2.31338e-11	2.89763e-10
PWY-LZ.257..superpathway.of.fermentation..Chlamydomonas.reinhardtii.	mode_of_delivery	Vaginal	-0.00269717	0.00269717	0.000398188	740	641	2.57422e-11	3.20099e-10
NAD.BIOSYNTHESIS.II..NAD.salvage.pathway.III..to.nicotinamide.riboside.	mode_of_delivery	Vaginal	-0.00190134	0.00190134	0.000281897	740	638	3.10421e-11	3.83225e-10
PWY-8178..pentose.phosphate.pathway..non.oxidative.branch..II	mode_of_delivery	Vaginal	-0.0026222	0.0026222	0.000389163	740	736	3.24308e-11	3.97509e-10
PWY-6936..seleno.amino.acid.biosynthesis..plants.	visit_age_mo	visit_age_mo	-0.00112483	0.00112483	0.000166984	740	737	3.28345e-11	3.99603e-10
PWY-FS.7..phosphatidylglycerol.biosynthesis.I..plastidic.	visit_age_mo	visit_age_mo	-0.00114031	0.00114031	0.000169928	740	729	3.87414e-11	4.68171e-10
GLYCOLYSIS.TCA.GLYOX.BYPASS..superpathway.of.glycolysis..pyruvate.dehydrogenase..TCA..and.glyoxylate.bypass	mode_of_delivery	Vaginal	-0.00238728	0.00238728	0.000355934	740	414	3.96215e-11	4.75457e-10
PWY-FS.8..phosphatidylglycerol.biosynthesis.II..non.plastidic.	visit_age_mo	visit_age_mo	-0.00113913	0.00113913	0.000169904	740	729	4.02681e-11	4.79861e-10
NONOXIPENT.PWY-.pentose.phosphate.pathway..non.oxidative.branch..I	mode_of_delivery	Vaginal	-0.00276558	0.00276558	0.000416506	740	737	6.10007e-11	7.21912e-10
HEMESYN2.PWY-.heme.b.biosynthesis.II..oxygen.independent.	mode_of_delivery	Vaginal	-0.00259809	0.00259809	0.000391808	740	719	6.45792e-11	7.59027e-10
PWY-5676..acetyl.CoA.fermentation.to.butanoate.II	visit_age_mo	visit_age_mo	0.0010081	0.0010081	0.000152686	740	575	7.75063e-11	9.04768e-10	PWY-5676	SCFA
BIOTIN.BIOSYNTHESIS.PWY-.biotin.biosynthesis.I	visit_age_mo	visit_age_mo	-0.00115557	0.00115557	0.000176006	740	708	9.80085e-11	1.13637e-09
PWY-.1241..ADP.L.glycero..beta..D.manno.heptose.biosynthesis	mode_of_delivery	Vaginal	-0.00237966	0.00237966	0.00036257	740	706	9.93736e-11	1.14446e-09
PWY-7385..1.3.propanediol.biosynthesis..engineered.	visit_age_mo	visit_age_mo	0.0008545	0.0008545	0.000130818	740	365	1.21145e-10	1.3859e-09
PWY-7185..UTP.and.CTP.dephosphorylation.I	probiotics_firstyr	probiotics_firstyr	0.00230103	0.00230103	0.00035311	740	477	1.33615e-10	1.51843e-09
PROTOCATECHUATE.ORTHO.CLEAVAGE.PWY-.protocatechuate.degradation.II..ortho.cleavage.pathway.	mode_of_delivery	Vaginal	-0.00178552	0.00178552	0.000274429	740	266	1.42433e-10	1.60799e-09
PWY-.301..L.ascorbate.degradation.I..bacterial..anaerobic.	mode_of_delivery	Vaginal	-0.00276654	0.00276654	0.00042686	740	688	1.66816e-10	1.87096e-09
PENTOSE.P.PWY-.pentose.phosphate.pathway	visit_age_mo	visit_age_mo	-0.000910244	0.000910244	0.000142433	740	736	2.93174e-10	3.26477e-09
PWY-.1296..purine.ribonucleosides.degradation	mode_of_delivery	Vaginal	-0.00263995	0.00263995	0.000413155	740	736	2.94894e-10	3.26477e-09
PWY-ZNC.1..assimilatory.sulfate.reduction.IV	mode_of_delivery	Vaginal	-0.0022037	0.0022037	0.000345421	740	663	3.13713e-10	3.45084e-09
PWY-5910..superpathway.of.geranylgeranyldiphosphate.biosynthesis.I..via.mevalonate.	visit_age_mo	visit_age_mo	-0.000539305	0.000539305	8.48819e-05	740	311	3.68695e-10	4.02982e-09
UDPNAGSYN.PWY-.UDP.N.acetyl.D.glucosamine.biosynthesis.I	visit_age_mo	visit_age_mo	-0.001286	0.001286	0.000204077	740	739	5.07657e-10	5.51354e-09
PWY-702..L.methionine.biosynthesis.II	visit_age_mo	visit_age_mo	-0.00133858	0.00133858	0.000213081	740	736	5.71915e-10	6.17236e-09
PWY-7858...5Z..dodecenoate.biosynthesis.II	mode_of_delivery	Vaginal	-0.00231125	0.00231125	0.0003694	740	663	6.67214e-10	7.15587e-09
PWY-6.389..phytol.degradation	mode_of_delivery	Vaginal	-0.00188553	0.00188553	0.000301458	740	446	6.75654e-10	7.20138e-09
PWY-5180..toluene.degradation.I..aerobic...via.o.cresol.	visit_age_mo	visit_age_mo	-0.000828217	0.000828217	0.000132905	740	161	7.77167e-10	8.23222e-09
P122.PWY-.heterolactic.fermentation	mode_of_delivery	Vaginal	-0.00205196	0.00205196	0.000329522	740	583	7.99003e-10	8.41159e-09	P122-PWY	SCFA
PWY-6.389..phytol.degradation	visit_age_mo	visit_age_mo	-0.000864799	0.000864799	0.000139744	740	446	1.00895e-09	1.05571e-08
PWY-5345..superpathway.of.L.methionine.biosynthesis..by.sulfhydrylation.	visit_age_mo	visit_age_mo	-0.00107191	0.00107191	0.000173347	740	685	1.03889e-09	1.08045e-08
PWY-7883..anhydromuropeptides.recycling.II	mode_of_delivery	Vaginal	-0.00197847	0.00197847	0.0003203	740	626	1.08147e-09	1.11795e-08
PWY-6.391..fatty.acid..beta..oxidation.VI..mammalian.peroxisome.	visit_age_mo	visit_age_mo	0.000704327	0.000704327	0.000114173	740	377	1.13496e-09	1.16622e-08
FUCCAT.PWY-.fucose.degradation	visit_age_mo	visit_age_mo	-0.00109503	0.00109503	0.000178173	740	677	1.3031e-09	1.32315e-08
PWY-6305..superpathway.of.putrescine.biosynthesis	visit_age_mo	visit_age_mo	-0.00115887	0.00115887	0.000188545	740	701	1.29936e-09	1.32315e-08
REDCITCYC..TCA.cycle.VI..Helicobacter.	mode_of_delivery	Vaginal	-0.00179443	0.00179443	0.000292599	740	411	1.41009e-09	1.42336e-08
HEME.BIOSYNTHESIS.II..heme.b.biosynthesis.I..aerobic.	mode_of_delivery	Vaginal	-0.00223808	0.00223808	0.000365014	740	709	1.42056e-09	1.42554e-08
PYRIDNUCSYN.PWY-.NAD.de.novo.biosynthesis.I..from.aspartate.	visit_age_mo	visit_age_mo	0.000982595	0.000982595	0.000160578	740	728	1.52949e-09	1.52594e-08
PWY-7456...beta...1.4..mannan.degradation	visit_age_mo	visit_age_mo	0.00092876	0.00092876	0.000152107	740	322	1.65432e-09	1.64093e-08
PWY-5138..fatty.acid..beta..oxidation.IV..unsaturated..even.number.	mode_of_delivery	Vaginal	-0.00226009	0.00226009	0.000370585	740	625	1.72738e-09	1.70356e-08
PWY-5994..palmitate.biosynthesis..type.I.fatty.acid.synthase.	visit_age_mo	visit_age_mo	0.000799465	0.000799465	0.00013122	740	216	1.79174e-09	1.75693e-08
PWY-7210..pyrimidine.deoxyribonucleotides.biosynthesis.from.CTP	probiotics_firstyr	probiotics_firstyr	0.00162723	0.00162723	0.000267737	740	476	1.95721e-09	1.90828e-08
PWY-.1479..tRNA.processing	mode_of_delivery	Vaginal	-0.00237427	0.00237427	0.000390866	740	679	1.99611e-09	1.93521e-08
PWY-8131..5..deoxyadenosine.degradation.II	mode_of_delivery	Vaginal	-0.00213551	0.00213551	0.000351675	740	584	2.01993e-09	1.9473e-08
PWY-6168..flavin.biosynthesis.III..fungi.	visit_age_mo	visit_age_mo	0.001289	0.001289	0.000212433	740	482	2.07563e-09	1.98982e-08
PYRIDNUCSYN.PWY-.NAD.de.novo.biosynthesis.I..from.aspartate.	mode_of_delivery	Vaginal	0.00208269	0.00208269	0.000346402	740	728	2.87942e-09	2.74505e-08
PWY-.1061..superpathway.of.L.alanine.biosynthesis	visit_age_mo	visit_age_mo	-0.00132718	0.00132718	0.000223345	740	715	4.33915e-09	4.1138e-08
PWY-7328..superpathway.of.UDP.glucose.derived.O.antigen.building.blocks.biosynthesis	visit_age_mo	visit_age_mo	0.0010761	0.0010761	0.000181745	740	669	4.91155e-09	4.63089e-08
PWY-5855..ubiquinol.7.biosynthesis..early.decarboxylation.	mode_of_delivery	Vaginal	-0.00169456	0.00169456	0.000289157	740	571	6.97135e-09	6.53707e-08
PWY-6607..guanosine.nucleotides.degradation.I	visit_age_mo	visit_age_mo	0.000858261	0.000858261	0.000146712	740	489	7.39984e-09	6.90116e-08
PWY-7315..dTDP.N.acetylthomosamine.biosynthesis	mode_of_delivery	Vaginal	-0.00197911	0.00197911	0.000338367	740	632	7.44156e-09	6.90255e-08
PWY-7184..pyrimidine.deoxyribonucleotides.de.novo.biosynthesis.I	visit_age_mo	visit_age_mo	-0.00104562	0.00104562	0.000180104	740	674	9.53851e-09	8.80004e-08
KDO.NAGLIPASYN.PWY-.superpathway.of..Kdo.2.lipid.A.biosynthesis	visit_age_mo	visit_age_mo	-0.000695628	0.000695628	0.000120003	740	464	1.00353e-08	9.20883e-08
DTDPRHAMSYN.PWY-.dTDP..beta..L.rhamnose.biosynthesis	mode_of_delivery	Vaginal	0.00308738	0.00308738	0.000534309	740	737	1.1147e-08	1.01746e-07
P105.PWY-.TCA.cycle.IV..2.oxoglutarate.decarboxylase.	visit_age_mo	visit_age_mo	-0.00110528	0.00110528	0.000191572	740	552	1.17132e-08	1.06348e-07
PWY-7211..superpathway.of.pyrimidine.deoxyribonucleotides.de.novo.biosynthesis	mode_of_delivery	Vaginal	-0.00226675	0.00226675	0.0003939	740	499	1.27468e-08	1.15124e-07
PWY-5030..L.histidine.degradation.III	visit_age_mo	visit_age_mo	0.00137567	0.00137567	0.000239309	740	431	1.31975e-08	1.18571e-07
PWY-5913..partial.TCA.cycle..obligate.autotrophs.	mode_of_delivery	Vaginal	-0.00241796	0.00241796	0.000422126	740	701	1.48136e-08	1.32397e-07
PWY-6185..4.methylcatechol.degradation..ortho.cleavage.	mode_of_delivery	Vaginal	-0.0013224	0.0013224	0.000230964	740	210	1.50229e-08	1.33572e-07
CARNMET.PWY-.L.carnitine.degradation.I	visit_age_mo	visit_age_mo	-0.000577194	0.000577194	0.000100915	740	431	1.55344e-08	1.37408e-07
ARGININE.SYN4.PWY-.L.ornithine.biosynthesis.II	mode_of_delivery	Vaginal	0.00259723	0.00259723	0.000455323	740	702	1.69481e-08	1.49143e-07
PWY-6612..superpathway.of.tetrahydrofolate.biosynthesis	visit_age_mo	visit_age_mo	-0.00090524	0.00090524	0.000159141	740	655	1.85268e-08	1.62204e-07
METHGLYUT.PWY-.superpathway.of.methylglyoxal.degradation	mode_of_delivery	Vaginal	-0.00144656	0.00144656	0.000254667	740	603	1.9385e-08	1.68856e-07
PWY-.781..aspartate.superpathway	visit_age_mo	visit_age_mo	-0.00110264	0.00110264	0.000195065	740	656	2.26078e-08	1.95934e-07
NONMEVIPP.PWY-.methylerythritol.phosphate.pathway.I	visit_age_mo	visit_age_mo	0.000739228	0.000739228	0.000132524	740	737	3.4194e-08	2.94859e-07
PWY-6595..superpathway.of.guanosine.nucleotides.degradation..plants.	visit_age_mo	visit_age_mo	0.000723899	0.000723899	0.000129897	740	484	3.51866e-08	3.01901e-07
PWY-6936..seleno.amino.acid.biosynthesis..plants.	mode_of_delivery	Vaginal	-0.00199528	0.00199528	0.000360222	740	737	4.23792e-08	3.61804e-07
P124.PWY-.Bifidobacterium.shunt	visit_age_mo	visit_age_mo	0.00138487	0.00138487	0.000252516	740	409	5.71341e-08	4.85357e-07	P124-PWY	SCFA
PWY-5971..palmitate.biosynthesis..type.II.fatty.acid.synthase.	visit_age_mo	visit_age_mo	-0.00137632	0.00137632	0.000251996	740	620	6.45809e-08	5.45915e-07
FOLSYN.PWY-.superpathway.of.tetrahydrofolate.biosynthesis.and.salvage	visit_age_mo	visit_age_mo	-0.000933507	0.000933507	0.000171477	740	655	7.10882e-08	5.97977e-07
PWY-1269..CMP.3.deoxy.D.manno.octulosonate.biosynthesis	visit_age_mo	visit_age_mo	-0.00100262	0.00100262	0.000184258	740	719	7.20653e-08	6.03239e-07
PWY-5188..tetrapyrrole.biosynthesis.I..from.glutamate.	visit_age_mo	visit_age_mo	-0.000971343	0.000971343	0.000179777	740	728	8.85929e-08	7.37987e-07
PWY-7269..mitochondrial.NADPH.production..yeast.	mode_of_delivery	Vaginal	-0.00151914	0.00151914	0.000281288	740	338	8.9731e-08	7.43857e-07
AST.PWY-.L.arginine.degradation.II..AST.pathway.	mode_of_delivery	Vaginal	-0.00183478	0.00183478	0.000339944	740	603	9.1363e-08	7.53744e-07
PWY-5918..superpathway.of.heme.b.biosynthesis.from.glutamate	mode_of_delivery	Vaginal	-0.00190604	0.00190604	0.000354438	740	684	1.01493e-07	8.33308e-07
GLYCOL.GLYOXDEG.PWY-.superpathway.of.glycol.metabolism.and.degradation	visit_age_mo	visit_age_mo	-0.000573768	0.000573768	0.000106721	740	451	1.02207e-07	8.35178e-07
FAO.PWY-.fatty.acid..beta..oxidation.I..generic.	mode_of_delivery	Vaginal	-0.00245437	0.00245437	0.00045972	740	634	1.24784e-07	1.01483e-06
UDPNAGSYN.PWY-.UDP.N.acetyl.D.glucosamine.biosynthesis.I	mode_of_delivery	Vaginal	-0.00234282	0.00234282	0.000440239	740	739	1.36658e-07	1.10616e-06
GLUCONEO.PWY-.gluconeogenesis.I	visit_age_mo	visit_age_mo	-0.000742733	0.000742733	0.000139604	740	730	1.37692e-07	1.10929e-06
PWY-7118..chitin.deacetylation	mode_of_delivery	Vaginal	-0.00212393	0.00212393	0.000400512	740	655	1.50819e-07	1.20937e-06
PWY-.42..2.methylcitrate.cycle.I	visit_age_mo	visit_age_mo	-0.000776106	0.000776106	0.000147272	740	478	1.79561e-07	1.43315e-06
PWY-.1337..oleate..beta..oxidation	mode_of_delivery	Vaginal	-0.00180561	0.00180561	0.000342987	740	542	1.84842e-07	1.46847e-06
PWY-5837..2.carboxy.1.4.naphthoquinol.biosynthesis	mode_of_delivery	Vaginal	-0.00182957	0.00182957	0.000347929	740	697	1.9068e-07	1.50786e-06
DARABCATK12.PWY-.D.arabinose.degradation.I	visit_age_mo	visit_age_mo	-0.000544844	0.000544844	0.000104119	740	456	2.17946e-07	1.71557e-06
PWY-5747..2.methylcitrate.cycle.II	visit_age_mo	visit_age_mo	-0.000574748	0.000574748	0.000110216	740	431	2.3952e-07	1.87637e-06
PWY-7400..L.arginine.biosynthesis.IV..archaebacteria.	mode_of_delivery	Vaginal	-0.00192617	0.00192617	0.000369428	740	723	2.4056e-07	1.87637e-06
UNINTEGRATED	visit_age_mo	visit_age_mo	-0.0156546	0.0156546	0.00300311	740	740	2.41967e-07	1.8788e-06
DTDPRHAMSYN.PWY-.dTDP..beta..L.rhamnose.biosynthesis	visit_age_mo	visit_age_mo	0.00129005	0.00129005	0.000247684	740	737	2.47508e-07	1.91317e-06
PWY-702..L.methionine.biosynthesis.II	mode_of_delivery	Vaginal	-0.00239105	0.00239105	0.000459663	740	736	2.56269e-07	1.97201e-06
PWY-6518..bile.acids.epimerization	visit_age_mo	visit_age_mo	9.53645e-05	9.53645e-05	1.83724e-05	740	41	2.71476e-07	2.0797e-06
PWY-7399..methylphosphonate.degradation.II	visit_age_mo	visit_age_mo	0.000101149	0.000101149	1.95238e-05	740	64	2.8565e-07	2.17856e-06
PWY-7269..mitochondrial.NADPH.production..yeast.	visit_age_mo	visit_age_mo	-0.000674915	0.000674915	0.000130394	740	338	2.92849e-07	2.22358e-06
FUC.RHAMCAT.PWY-.superpathway.of.fucose.and.rhamnose.degradation	visit_age_mo	visit_age_mo	-0.000915055	0.000915055	0.000176935	740	655	2.99422e-07	2.26348e-06
PWY-6.391..fatty.acid..beta..oxidation.VI..mammalian.peroxisome.	mode_of_delivery	Vaginal	-0.00126565	0.00126565	0.000246297	740	377	3.54886e-07	2.67099e-06
P42.PWY-.incomplete.reductive.TCA.cycle	mode_of_delivery	Vaginal	-0.00154215	0.00154215	0.000301906	740	595	4.15205e-07	3.11132e-06
FERMENTATION.PWY-.mixed.acid.fermentation	mode_of_delivery	Vaginal	-0.00228805	0.00228805	0.000449124	740	692	4.44998e-07	3.32007e-06	FERMENTATION-PWY	SCFA
PWY-6318..L.phenylalanine.degradation.IV..mammalian..via.side.chain.	mode_of_delivery	Vaginal	-0.000637031	0.000637031	0.000125413	740	166	4.80312e-07	3.56803e-06
PWY-6608..guanosine.nucleotides.degradation.III	visit_age_mo	visit_age_mo	-0.00108924	0.00108924	0.000214957	740	725	5.11114e-07	3.77282e-06
PWY-6920..6.gingerol.analog.biosynthesis..engineered.	visit_age_mo	visit_age_mo	0.000200113	0.000200113	3.94951e-05	740	78	5.12277e-07	3.77282e-06
P108.PWY-.pyruvate.fermentation.to.propanoate.I	mode_of_delivery	Vaginal	-0.00154385	0.00154385	0.000305238	740	487	5.3604e-07	3.93096e-06	P108-PWY	SCFA
PWY-7094..fatty.acid.salvage	mode_of_delivery	Vaginal	-0.00171175	0.00171175	0.000338625	740	548	5.43829e-07	3.97111e-06
HEME.BIOSYNTHESIS.II.1..heme.b.biosynthesis.V..aerobic.	mode_of_delivery	Vaginal	-0.00190071	0.00190071	0.000376732	740	689	5.713e-07	4.15403e-06
POLYAMSYN.PWY-.superpathway.of.polyamine.biosynthesis.I	visit_age_mo	visit_age_mo	-0.000935777	0.000935777	0.000185651	740	664	5.85155e-07	4.23682e-06
PWY-3001..superpathway.of.L.isoleucine.biosynthesis.I	visit_age_mo	visit_age_mo	-0.000784678	0.000784678	0.000156127	740	738	6.29937e-07	4.5419e-06
PWY-.1586..peptidoglycan.maturation..meso.diaminopimelate.containing.	mode_of_delivery	Vaginal	-0.00248107	0.00248107	0.000493812	740	738	6.3495e-07	4.55889e-06
HSERMETANA.PWY-.L.methionine.biosynthesis.III	visit_age_mo	visit_age_mo	0.000975166	0.000975166	0.000194791	740	731	6.95503e-07	4.95221e-06
PWY-7187..pyrimidine.deoxyribonucleotides.de.novo.biosynthesis.II	mode_of_delivery	Vaginal	-0.00162884	0.00162884	0.000325332	740	628	6.93793e-07	4.95221e-06
PWY-.166..superpathway.of.pyrimidine.deoxyribonucleotides.de.novo.biosynthesis..E..coli.	mode_of_delivery	Vaginal	-0.0017689	0.0017689	0.000353547	740	649	7.05723e-07	5.00422e-06
HOMOSER.METSYN.PWY-.L.methionine.biosynthesis.I	mode_of_delivery	Vaginal	-0.00195155	0.00195155	0.000390873	740	688	7.439e-07	5.25322e-06
P125.PWY-.superpathway.of..R.R..butanediol.biosynthesis	visit_age_mo	visit_age_mo	-0.000499096	0.000499096	0.000100127	740	370	7.74874e-07	5.44952e-06
ARGSYNBSUB.PWY-.L.arginine.biosynthesis.II..acetyl.cycle.	mode_of_delivery	Vaginal	-0.00194107	0.00194107	0.000390789	740	736	8.46074e-07	5.92597e-06
GLUCARDEG.PWY-.D.glucarate.degradation.I	mode_of_delivery	Vaginal	-0.00185447	0.00185447	0.000373539	740	667	8.56416e-07	5.97403e-06
PWY-6.409..superpathway.of.purine.nucleotide.salvage	mode_of_delivery	Vaginal	-0.00187209	0.00187209	0.000377579	740	700	8.84465e-07	6.14471e-06
PWY-5920..superpathway.of.heme.b.biosynthesis.from.glycine	visit_age_mo	visit_age_mo	-0.000755951	0.000755951	0.000152805	740	599	9.34066e-07	6.46314e-06
KETOGLUCONMET.PWY-.ketogluconate.metabolism	visit_age_mo	visit_age_mo	-0.000988469	0.000988469	0.000200229	740	578	9.83942e-07	6.7809e-06
PWY-7340..9.cis..11.trans.octadecadienoyl.CoA.degradation..isomerase.dependent..yeast.	mode_of_delivery	Vaginal	-0.000911407	0.000911407	0.000184826	740	330	1.01125e-06	6.94121e-06
PWY-.461..L.lysine.degradation.I	visit_age_mo	visit_age_mo	-0.000543732	0.000543732	0.000110365	740	404	1.03402e-06	7.06921e-06
COA.PWY-1..superpathway.of.coenzyme.A.biosynthesis.III..mammals.	visit_age_mo	visit_age_mo	0.000687711	0.000687711	0.00013999	740	739	1.10875e-06	7.55005e-06
GLYCOLYSIS.E.D..superpathway.of.glycolysis.and.the.Entner.Doudoroff.pathway	visit_age_mo	visit_age_mo	-0.000849637	0.000849637	0.000173046	740	702	1.12342e-06	7.61974e-06
P562.PWY-.myo.inositol.degradation.I	probiotics_firstyr	probiotics_firstyr	0.000615524	0.000615524	0.000125706	740	287	1.19989e-06	8.10634e-06
PWY-7790..UMP.biosynthesis.II	visit_age_mo	visit_age_mo	0.000708608	0.000708608	0.000144759	740	738	1.20863e-06	8.13339e-06
PWY-5136..fatty.acid..beta..oxidation.II..plant.peroxisome.	mode_of_delivery	Vaginal	-0.00221066	0.00221066	0.000452743	740	695	1.28381e-06	8.60554e-06
PWY-6185..4.methylcatechol.degradation..ortho.cleavage.	visit_age_mo	visit_age_mo	-0.000518267	0.000518267	0.000107065	740	210	1.57796e-06	1.05361e-05
NAGLIPASYN.PWY-.lipid.IVA.biosynthesis..E..coli.	visit_age_mo	visit_age_mo	-0.000848674	0.000848674	0.00017553	740	708	1.62267e-06	1.0751e-05
PWY-8073..lipid.IVA.biosynthesis..P..putida.	visit_age_mo	visit_age_mo	-0.000848674	0.000848674	0.00017553	740	708	1.62267e-06	1.0751e-05
MET.SAM.PWY-.superpathway.of.S.adenosyl.L.methionine.biosynthesis	mode_of_delivery	Vaginal	-0.00201121	0.00201121	0.000416304	740	688	1.65301e-06	1.08973e-05
METSYN.PWY-.superpathway.of.L.homoserine.and.L.methionine.biosynthesis	mode_of_delivery	Vaginal	-0.00207558	0.00207558	0.000429677	740	688	1.65745e-06	1.08973e-05
ASPASN.PWY-.superpathway.of.L.aspartate.and.L.asparagine.biosynthesis	visit_age_mo	visit_age_mo	-0.000680589	0.000680589	0.000141896	740	737	1.95648e-06	1.28142e-05
LIPASYN.PWY-.phospholipases	visit_age_mo	visit_age_mo	-0.000934915	0.000934915	0.000195055	740	217	1.98809e-06	1.29717e-05
PWY-5972..stearate.biosynthesis.I..animals.	visit_age_mo	visit_age_mo	0.000322207	0.000322207	6.72692e-05	740	289	2.01973e-06	1.31282e-05
PWY-7791..UMP.biosynthesis.III	visit_age_mo	visit_age_mo	0.000692457	0.000692457	0.000144815	740	738	2.1006e-06	1.36024e-05
GLUDEG.I.PWY-.GABA.shunt	mode_of_delivery	Vaginal	0.00142115	0.00142115	0.000298098	740	475	2.25043e-06	1.45178e-05
DAPLYSINESYN.PWY-.L.lysine.biosynthesis.I	visit_age_mo	visit_age_mo	-0.000943136	0.000943136	0.000198891	740	725	2.54228e-06	1.63392e-05
PWY-.1415..superpathway.of.heme.b.biosynthesis.from.uroporphyrinogen.III	mode_of_delivery	Vaginal	-0.0018407	0.0018407	0.000388733	740	652	2.62702e-06	1.68207e-05
THREOCAT.PWY-.superpathway.of.L.threonine.metabolism	mode_of_delivery	Vaginal	-0.00123421	0.00123421	0.000262791	740	241	3.1575e-06	2.01423e-05
PWY-6630..superpathway.of.L.tyrosine.biosynthesis	mode_of_delivery	Vaginal	-0.00172854	0.00172854	0.000368467	740	719	3.23944e-06	2.05884e-05
PWY-6182..superpathway.of.salicylate.degradation	mode_of_delivery	Vaginal	-0.000889164	0.000889164	0.000190995	740	147	3.83608e-06	2.42905e-05
PROTOCATECHUATE.ORTHO.CLEAVAGE.PWY-.protocatechuate.degradation.II..ortho.cleavage.pathway.	visit_age_mo	visit_age_mo	-0.000591985	0.000591985	0.000127214	740	266	3.87161e-06	2.43382e-05
PWY-6961..L.ascorbate.degradation.II..bacterial..aerobic.	mode_of_delivery	Vaginal	-0.0020058	0.0020058	0.000431035	740	617	3.87199e-06	2.43382e-05
PWY-7220..adenosine.deoxyribonucleotides.de.novo.biosynthesis.II	visit_age_mo	visit_age_mo	-0.000921365	0.000921365	0.000198455	740	736	4.07331e-06	2.54175e-05
PWY-7222..guanosine.deoxyribonucleotides.de.novo.biosynthesis.II	visit_age_mo	visit_age_mo	-0.000921365	0.000921365	0.000198455	740	736	4.07331e-06	2.54175e-05
ARGSYN.PWY-.L.arginine.biosynthesis.I..via.L.ornithine.	mode_of_delivery	Vaginal	-0.00174355	0.00174355	0.000375687	740	737	4.10616e-06	2.55296e-05
PWY-6859..all.trans.farnesol.biosynthesis	visit_age_mo	visit_age_mo	-0.000625731	0.000625731	0.000134936	740	691	4.17899e-06	2.58886e-05
PWY-.1338..polymyxin.resistance	mode_of_delivery	Vaginal	-0.00149884	0.00149884	0.000323354	740	580	4.21742e-06	2.60327e-05
PWY-7197..pyrimidine.deoxyribonucleotide.phosphorylation	visit_age_mo	visit_age_mo	-0.000810873	0.000810873	0.000175005	740	731	4.25447e-06	2.61673e-05
P23.PWY-.reductive.TCA.cycle.I	visit_age_mo	visit_age_mo	-0.000284885	0.000284885	6.15736e-05	740	132	4.38967e-06	2.69024e-05
PWY-.1296..purine.ribonucleosides.degradation	visit_age_mo	visit_age_mo	-0.00088495	0.00088495	0.000191522	740	736	4.51751e-06	2.75874e-05
PANTOSYN.PWY-.superpathway.of.coenzyme.A.biosynthesis.I..bacteria.	visit_age_mo	visit_age_mo	0.000681752	0.000681752	0.000147934	740	735	4.78147e-06	2.89929e-05
PWY-5347..superpathway.of.L.methionine.biosynthesis..transsulfuration.	mode_of_delivery	Vaginal	-0.002005	0.002005	0.000434995	740	688	4.76476e-06	2.89929e-05
LACTOSECAT.PWY-.lactose.and.galactose.degradation.I	visit_age_mo	visit_age_mo	-0.000818227	0.000818227	0.000178926	740	638	5.64103e-06	3.40845e-05
URSIN.PWY-.ureide.biosynthesis	mode_of_delivery	Vaginal	-0.000502103	0.000502103	0.000110969	740	63	7.05135e-06	4.24566e-05
PWY-6969..TCA.cycle.V..2.oxoglutarate.synthase.	mode_of_delivery	Vaginal	-0.0018621	0.0018621	0.000413313	740	655	7.70827e-06	4.62496e-05
PWY-6168..flavin.biosynthesis.III..fungi.	probiotics_firstyr	probiotics_firstyr	-0.00115559	0.00115559	0.000257257	740	482	8.19272e-06	4.89851e-05
P461.PWY-.hexitol.fermentation.to.lactate..formate..ethanol.and.acetate	mode_of_delivery	Vaginal	-0.00189969	0.00189969	0.000423488	740	712	8.4265e-06	5.02079e-05	P461-PWY	SCFA
PWY-5972..stearate.biosynthesis.I..animals.	mode_of_delivery	Vaginal	-0.000649466	0.000649466	0.000145115	740	289	8.83104e-06	5.2404e-05
PWY-6545..pyrimidine.deoxyribonucleotides.de.novo.biosynthesis.III	mode_of_delivery	Vaginal	-0.00152242	0.00152242	0.000340212	740	570	8.85616e-06	5.2404e-05
PWY-561..superpathway.of.glyoxylate.cycle.and.fatty.acid.degradation	mode_of_delivery	Vaginal	-0.00199706	0.00199706	0.000448664	740	584	9.86768e-06	5.81888e-05
PWY-7783..plasmalogen.degradation	visit_age_mo	visit_age_mo	-0.000190206	0.000190206	4.29956e-05	740	77	1.11628e-05	6.56003e-05
SO4ASSIM.PWY-.assimilatory.sulfate.reduction.I	mode_of_delivery	Vaginal	-0.00180108	0.00180108	0.000410012	740	695	1.28389e-05	7.51929e-05
PWY-6572..chondroitin.sulfate.degradation.I..bacterial.	mode_of_delivery	Vaginal	0.00136793	0.00136793	0.000311844	740	145	1.31978e-05	7.70321e-05
POLYAMSYN.PWY-.superpathway.of.polyamine.biosynthesis.I	mode_of_delivery	Vaginal	-0.00175445	0.00175445	0.000400491	740	664	1.35473e-05	7.88041e-05
PWY-6572..chondroitin.sulfate.degradation.I..bacterial.	visit_age_mo	visit_age_mo	0.000632909	0.000632909	0.000144558	740	145	1.37007e-05	7.94268e-05
PWY-5705..allantoin.degradation.to.glyoxylate.III	visit_age_mo	visit_age_mo	-0.000490105	0.000490105	0.000112099	740	425	1.40833e-05	8.13704e-05
PHOSLIPSYN.PWY-.superpathway.of.phospholipid.biosynthesis.I..bacteria.	visit_age_mo	visit_age_mo	-0.000809936	0.000809936	0.000185366	740	719	1.42527e-05	8.20726e-05
P185.PWY-.formaldehyde.assimilation.III..dihydroxyacetone.cycle.	mode_of_delivery	Vaginal	-0.00172392	0.00172392	0.000394915	740	551	1.45158e-05	8.33082e-05
ARG.POLYAMINE.SYN..superpathway.of.arginine.and.polyamine.biosynthesis	mode_of_delivery	Vaginal	-0.00185426	0.00185426	0.00042561	740	662	1.50805e-05	8.62604e-05
CALVIN.PWY-.Calvin.Benson.Bassham.cycle	mode_of_delivery	Vaginal	-0.0014496	0.0014496	0.000333228	740	733	1.55261e-05	8.85144e-05
P4.PWY-.superpathway.of.L.lysine..L.threonine.and.L.methionine.biosynthesis.I	mode_of_delivery	Vaginal	-0.00182454	0.00182454	0.0004198	740	669	1.58009e-05	8.97823e-05
PWY-5723..Rubisco.shunt	mode_of_delivery	Vaginal	-0.00211904	0.00211904	0.000488173	740	655	1.61899e-05	9.16893e-05
TCA.GLYOX.BYPASS..superpathway.of.glyoxylate.bypass.and.TCA	mode_of_delivery	Vaginal	-0.00198937	0.00198937	0.000460768	740	579	1.79452e-05	0.000101296
HCAMHPDEG.PWY-.3.phenylpropanoate.and.3..3.hydroxyphenyl.propanoate.degradation.to.2.hydroxypentadienoate	mode_of_delivery	Vaginal	-0.00140634	0.00140634	0.000326637	740	393	1.89202e-05	0.000105871	HCAMHPDEG-PWY	Propiote
PWY-6690..cinnamate.and.3.hydroxycinnamate.degradation.to.2.hydroxypentadienoate	mode_of_delivery	Vaginal	-0.00140634	0.00140634	0.000326637	740	393	1.89202e-05	0.000105871
PWY-7165..L.ascorbate.biosynthesis.VIII..engineered.pathway.	mode_of_delivery	Vaginal	-0.00090567	0.00090567	0.000210364	740	106	1.89407e-05	0.000105871
LIPASYN.PWY-.phospholipases	mode_of_delivery	Vaginal	-0.00180911	0.00180911	0.000420778	740	217	1.94324e-05	0.000108266
HEXITOLDEGSUPER.PWY-.superpathway.of.hexitol.degradation..bacteria.	probiotics_firstyr	probiotics_firstyr	-0.0011698	0.0011698	0.000272539	740	508	2.00584e-05	0.000110683
PWY-5100..pyruvate.fermentation.to.acetate.and.lactate.II	mode_of_delivery	Vaginal	-0.00191866	0.00191866	0.000446865	740	736	1.99378e-05	0.000110683	PWY-5100	SCFA
PWY-6549..L.glutamine.biosynthesis.III	mode_of_delivery	Vaginal	-0.00119818	0.00119818	0.000279151	740	422	2.00597e-05	0.000110683
PWY-4984..urea.cycle	mode_of_delivery	Vaginal	0.00186085	0.00186085	0.000434042	740	514	2.05009e-05	0.000112755
PWY-.1277..3.phenylpropanoate.and.3..3.hydroxyphenyl.propanoate.degradation	mode_of_delivery	Vaginal	-0.00149814	0.00149814	0.000351498	740	382	2.28815e-05	0.000125446
PWY-7851..coenzyme.A.biosynthesis.II..eukaryotic.	visit_age_mo	visit_age_mo	0.000621451	0.000621451	0.000146198	740	739	2.40496e-05	0.00013143
PWY-6113..superpathway.of.mycolate.biosynthesis	visit_age_mo	visit_age_mo	0.000391709	0.000391709	9.23306e-05	740	81	2.49341e-05	0.000135831
PWY-7234..inosine.5..phosphate.biosynthesis.III	mode_of_delivery	Vaginal	-0.00155214	0.00155214	0.000367602	740	720	2.72086e-05	0.000147753
PWY-5005..biotin.biosynthesis.II	mode_of_delivery	Vaginal	-0.00148309	0.00148309	0.000351394	740	503	2.74159e-05	0.000148409
SULFATE.CYS.PWY-.superpathway.of.sulfate.assimilation.and.cysteine.biosynthesis	mode_of_delivery	Vaginal	-0.0015963	0.0015963	0.000378597	740	694	2.79235e-05	0.000150682
PWY-7446..sulfoquinovose.degradation.I	visit_age_mo	visit_age_mo	-0.000489191	0.000489191	0.000116066	740	274	2.8119e-05	0.000150788
PWY-6.389..phytol.degradation	symptoms	AP	-0.00145966	0.00145966	0.000346302	740	446	2.80879e-05	0.000150788
RUMP.PWY-.formaldehyde.oxidation.I	visit_age_mo	visit_age_mo	0.000425184	0.000425184	0.000101079	740	319	2.91433e-05	0.000155794
PWY-7111..pyruvate.fermentation.to.isobutanol..engineered.	visit_age_mo	visit_age_mo	-0.000789942	0.000789942	0.000187828	740	739	2.92436e-05	0.000155845
PWY-6807..xyloglucan.degradation.II..exoglucanase.	visit_age_mo	visit_age_mo	0.000314394	0.000314394	7.50237e-05	740	48	3.12077e-05	0.000165797
TCA..TCA.cycle.I..prokaryotic.	mode_of_delivery	Vaginal	-0.00195408	0.00195408	0.000466619	740	596	3.15942e-05	0.000167332
PWY-6.367..ketogenesis	visit_age_mo	visit_age_mo	0.000169929	0.000169929	4.05968e-05	740	124	3.18609e-05	0.000168225
PWY-5384..sucrose.degradation.IV..sucrose.phosphorylase.	visit_age_mo	visit_age_mo	-0.000828077	0.000828077	0.000199302	740	738	3.6374e-05	0.000191466
REDCITCYC..TCA.cycle.VI..Helicobacter.	visit_age_mo	visit_age_mo	-0.000561533	0.000561533	0.000135637	740	411	3.87608e-05	0.000203405
PWY-801..homocysteine.and.cysteine.interconversion	mode_of_delivery	Vaginal	-0.000953058	0.000953058	0.000230373	740	429	3.92509e-05	0.000205349
PWY-.1261..anhydromuropeptides.recycling.I	mode_of_delivery	Vaginal	-0.00151795	0.00151795	0.000367005	740	703	3.94171e-05	0.000205592
PWY-5417..catechol.degradation.III..ortho.cleavage.pathway.	mode_of_delivery	Vaginal	-0.000994517	0.000994517	0.000240855	740	195	4.05955e-05	0.000209825
PWY-5431..aromatic.compounds.degradation.via..beta..ketoadipate	mode_of_delivery	Vaginal	-0.000994517	0.000994517	0.000240855	740	195	4.05955e-05	0.000209825
PWY-6588..pyruvate.fermentation.to.acetone	mode_of_delivery	Vaginal	-0.00102651	0.00102651	0.000248519	740	502	4.0354e-05	0.000209825
PWY-6876..isopropanol.biosynthesis..engineered.	mode_of_delivery	Vaginal	-0.000525065	0.000525065	0.000127314	740	159	4.14574e-05	0.000213636
PWY-7388..octanoyl..acyl.carrier.protein..biosynthesis..mitochondria..yeast.	mode_of_delivery	Vaginal	-0.000941884	0.000941884	0.000228459	740	177	4.17038e-05	0.000214263
CITRULBIO.PWY-.L.citrulline.biosynthesis	probiotics_firstyr	probiotics_firstyr	-0.000972708	0.000972708	0.000236724	740	706	4.4202e-05	0.00022642
COLANSYN.PWY-.colanic.acid.building.blocks.biosynthesis	mode_of_delivery	Vaginal	0.00159606	0.00159606	0.000390146	740	663	4.77173e-05	0.000243699
CATECHOL.ORTHO.CLEAVAGE.PWY-.catechol.degradation.to..beta..ketoadipate	mode_of_delivery	Vaginal	-0.00087243	0.00087243	0.000215336	740	200	5.63105e-05	0.000286733
PWY-6305..superpathway.of.putrescine.biosynthesis	mode_of_delivery	Vaginal	-0.00163914	0.00163914	0.000406734	740	701	6.15852e-05	0.000312663
GALACTITOLCAT.PWY-.galactitol.degradation	probiotics_firstyr	probiotics_firstyr	-0.000975	0.000975	0.000242671	740	522	6.47973e-05	0.000328001
PWY-821..superpathway.of.sulfur.amino.acid.biosynthesis..Saccharomyces.cerevisiae.	visit_age_mo	visit_age_mo	-0.000646886	0.000646886	0.000161184	740	602	6.60017e-05	0.000333115
PWY-8004..Entner.Doudoroff.pathway.I	visit_age_mo	visit_age_mo	-0.000652341	0.000652341	0.000162591	740	712	6.63285e-05	0.000333782
PWY-5920..superpathway.of.heme.b.biosynthesis.from.glycine	mode_of_delivery	Vaginal	-0.00132061	0.00132061	0.000329634	740	599	6.7955e-05	0.000340967
PWY-5028..L.histidine.degradation.II	probiotics_firstyr	probiotics_firstyr	0.000608947	0.000608947	0.0001538	740	270	8.24567e-05	0.000412524
PWY-5103..L.isoleucine.biosynthesis.III	visit_age_mo	visit_age_mo	-0.000619615	0.000619615	0.000156633	740	739	8.36482e-05	0.000417268
THRESYN.PWY-.superpathway.of.L.threonine.biosynthesis	visit_age_mo	visit_age_mo	-0.000540885	0.000540885	0.00013691	740	740	8.54462e-05	0.000425002
PWY-6168..flavin.biosynthesis.III..fungi.	mode_of_delivery	Vaginal	0.00180944	0.00180944	0.000458265	740	482	8.62146e-05	0.000427585
PWY-5497..purine.nucleobases.degradation.II..anaerobic.	visit_age_mo	visit_age_mo	0.000559454	0.000559454	0.000142354	740	538	9.29581e-05	0.000459701
PWY-6608..guanosine.nucleotides.degradation.III	mode_of_delivery	Vaginal	-0.00181952	0.00181952	0.000463711	740	725	9.53283e-05	0.000470067
PWY-7356..thiamine.diphosphate.salvage.IV..yeast.	mode_of_delivery	Vaginal	-0.00165305	0.00165305	0.000421491	740	650	9.60773e-05	0.000472403
POLYAMINSYN3.PWY-.superpathway.of.polyamine.biosynthesis.II	mode_of_delivery	Vaginal	-0.000469211	0.000469211	0.00012064	740	89	0.000109625	0.000537478
PWY-7237..myo...chiro..and.scyllo.inositol.degradation	visit_age_mo	visit_age_mo	0.00132389	0.00132389	0.000340985	740	500	0.000112668	0.000550819
X3.HYDROXYPHENYLACETATE.DEGRADATION.PWY-.4.hydroxyphenylacetate.degradation	mode_of_delivery	Vaginal	-0.000841634	0.000841634	0.000217045	740	236	0.000114893	0.000560103	3-HYDROXYPHENYLACETATE-DEGRADATION-PWY	Acetate
PWY-5860..superpathway.of.demethylmenaquinol.6.biosynthesis.I	mode_of_delivery	Vaginal	-0.00153526	0.00153526	0.000396925	740	584	0.000119518	0.000580999
PWY-6328..L.lysine.degradation.X	visit_age_mo	visit_age_mo	0.000208847	0.000208847	5.40258e-05	740	92	0.000120574	0.000584479
PWY-6435..4.hydroxybenzoate.biosynthesis.III..plants.	visit_age_mo	visit_age_mo	0.000247085	0.000247085	6.39906e-05	740	109	0.000122733	0.000593269
COA.PWY-.coenzyme.A.biosynthesis.I..prokaryotic.	visit_age_mo	visit_age_mo	0.000593989	0.000593989	0.000154242	740	739	0.000127876	0.000616391
PWY-5981..CDP.diacylglycerol.biosynthesis.III	probiotics_firstyr	probiotics_firstyr	0.000716086	0.000716086	0.000186017	740	678	0.000128629	0.000618283
ORNDEG.PWY-.superpathway.of.ornithine.degradation	mode_of_delivery	Vaginal	-0.00183105	0.00183105	0.000477398	740	637	0.000136075	0.000652249
PWY-6531..mannitol.cycle	visit_age_mo	visit_age_mo	-0.000684298	0.000684298	0.000179339	740	621	0.000147235	0.000703774
PWY-6.430..myristate.biosynthesis..mitochondria.	mode_of_delivery	Vaginal	-0.000801953	0.000801953	0.000210658	740	160	0.000152454	0.000726699
PWY-FS.7..phosphatidylglycerol.biosynthesis.I..plastidic.	mode_of_delivery	Vaginal	-0.00138775	0.00138775	0.000366573	740	729	0.000165758	0.000787926
PWY-FS.8..phosphatidylglycerol.biosynthesis.II..non.plastidic.	mode_of_delivery	Vaginal	-0.00138718	0.00138718	0.000366521	740	729	0.000166409	0.000788834
PWY-5028..L.histidine.degradation.II	visit_age_mo	visit_age_mo	-0.000480047	0.000480047	0.000127002	740	270	0.000169649	0.000801977
PWY-8086...S..lactate.fermentation.to.propanoate..acetate.and.hydrogen	visit_age_mo	visit_age_mo	0.000163933	0.000163933	4.34988e-05	740	88	0.000177267	0.000835688	PWY-8086	SCFA
CATECHOL.ORTHO.CLEAVAGE.PWY-.catechol.degradation.to..beta..ketoadipate	visit_age_mo	visit_age_mo	-0.000375856	0.000375856	9.9821e-05	740	200	0.000179632	0.000844516
P41.PWY-.pyruvate.fermentation.to.acetate.and..S..lactate.I	mode_of_delivery	Vaginal	-0.00173244	0.00173244	0.000460394	740	736	0.000181296	0.000850013	P41-PWY	SCFA
ARG.POLYAMINE.SYN..superpathway.of.arginine.and.polyamine.biosynthesis	visit_age_mo	visit_age_mo	-0.000741343	0.000741343	0.000197295	740	662	0.000185198	0.000863589
PWY-5676..acetyl.CoA.fermentation.to.butanoate.II	mode_of_delivery	Vaginal	-0.00123779	0.00123779	0.000329377	740	575	0.000184877	0.000863589	PWY-5676	SCFA
DENOVOPURINE2.PWY-.superpathway.of.purine.nucleotides.de.novo.biosynthesis.II	mode_of_delivery	Vaginal	-0.00149038	0.00149038	0.000398042	740	632	0.000195053	0.000907075
PWY-5417..catechol.degradation.III..ortho.cleavage.pathway.	visit_age_mo	visit_age_mo	-0.000416219	0.000416219	0.000111651	740	195	0.000207943	0.000961806
PWY-5431..aromatic.compounds.degradation.via..beta..ketoadipate	visit_age_mo	visit_age_mo	-0.000416219	0.000416219	0.000111651	740	195	0.000207943	0.000961806
PWY-5028..L.histidine.degradation.II	mode_of_delivery	Vaginal	-0.0010207	0.0010207	0.000273971	740	270	0.00020981	0.000967832
GLUTORN.PWY-.L.ornithine.biosynthesis.I	mode_of_delivery	Vaginal	-0.00129994	0.00129994	0.000349145	740	738	0.00021174	0.000974116
P164.PWY-.purine.nucleobases.degradation.I..anaerobic.	mode_of_delivery	Vaginal	-0.00132568	0.00132568	0.000356164	740	375	0.00021265	0.00097569
PWY-6478..GDP.D.glycero..alpha..D.manno.heptose.biosynthesis	mode_of_delivery	Vaginal	0.000636844	0.000636844	0.000171631	740	95	0.000222417	0.00101778
PWY-5265..peptidoglycan.biosynthesis.II..staphylococci.	visit_age_mo	visit_age_mo	-0.000638822	0.000638822	0.000172526	740	407	0.000229226	0.00104337
PWY-6628..superpathway.of.L.phenylalanine.biosynthesis	mode_of_delivery	Vaginal	-0.00140947	0.00140947	0.000380622	740	727	0.000228963	0.00104337
PWY-7316..dTDP.N.acetylviosamine.biosynthesis	probiotics_firstyr	probiotics_firstyr	0.000646463	0.000646463	0.000174656	740	117	0.000230474	0.00104628
PWY-7282..4.amino.2.methyl.5.diphosphomethylpyrimidine.biosynthesis.II	visit_age_mo	visit_age_mo	-0.000565357	0.000565357	0.000153374	740	723	0.000244438	0.00110674
GALACT.GLUCUROCAT.PWY-.superpathway.of.hexuronide.and.hexuronate.degradation	visit_age_mo	visit_age_mo	0.000549366	0.000549366	0.00014934	740	498	0.000251607	0.0011362
P164.PWY-.purine.nucleobases.degradation.I..anaerobic.	visit_age_mo	visit_age_mo	0.000606867	0.000606867	0.000165103	740	375	0.000254472	0.00114613
PWY-7384..anaerobic.energy.metabolism..invertebrates..mitochondrial.	visit_age_mo	visit_age_mo	0.000123323	0.000123323	3.35775e-05	740	60	0.000257325	0.00115594	PWY-7384	SCFA
PWY-6284..superpathway.of.unsaturated.fatty.acids.biosynthesis..E..coli.	mode_of_delivery	Vaginal	-0.00154607	0.00154607	0.000421316	740	589	0.000260466	0.001167
ILEUSYN.PWY-.L.isoleucine.biosynthesis.I..from.threonine.	visit_age_mo	visit_age_mo	-0.000579726	0.000579726	0.000158015	740	739	0.000261282	0.0011676
PWY-6731..starch.degradation.III	visit_age_mo	visit_age_mo	0.000717716	0.000717716	0.000196206	740	631	0.000272372	0.001214
GALACTARDEG.PWY-.D.galactarate.degradation.I	mode_of_delivery	Vaginal	-0.00163631	0.00163631	0.000448704	740	683	0.000284327	0.00126073
GLUCARGALACTSUPER.PWY-.superpathway.of.D.glucarate.and.D.galactarate.degradation	mode_of_delivery	Vaginal	-0.00163631	0.00163631	0.000448704	740	683	0.000284327	0.00126073
PWY-7210..pyrimidine.deoxyribonucleotides.biosynthesis.from.CTP	mode_of_delivery	Vaginal	-0.00173474	0.00173474	0.000476933	740	476	0.000294785	0.00130374
PWY-7953..UDP.N.acetylmuramoyl.pentapeptide.biosynthesis.III..meso.diaminopimelate.containing.	visit_age_mo	visit_age_mo	0.000475902	0.000475902	0.000131399	740	737	0.000312656	0.00137922
P105.PWY-.TCA.cycle.IV..2.oxoglutarate.decarboxylase.	mode_of_delivery	Vaginal	-0.00148702	0.00148702	0.000413262	740	552	0.000341843	0.00150411
PWY-6708..ubiquinol.8.biosynthesis..early.decarboxylation.	visit_age_mo	visit_age_mo	-0.000305919	0.000305919	8.53255e-05	740	237	0.000358934	0.00157527
UBISYN.PWY-.superpathway.of.ubiquinol.8.biosynthesis..early.decarboxylation.	visit_age_mo	visit_age_mo	-0.000317749	0.000317749	8.8721e-05	740	237	0.000364193	0.00159427
PWY-6478..GDP.D.glycero..alpha..D.manno.heptose.biosynthesis	visit_age_mo	visit_age_mo	0.000282152	0.000282152	7.9561e-05	740	95	0.000415356	0.00181362
PWY-5675..nitrate.reduction.V..assimilatory.	mode_of_delivery	Vaginal	-0.00147611	0.00147611	0.000417796	740	630	0.000436414	0.00190073
PWY-5367..petroselinate.biosynthesis	mode_of_delivery	Vaginal	-0.00109526	0.00109526	0.000310267	740	590	0.000441325	0.00191725
PWY-5088..L.glutamate.degradation.VIII..to.propanoate.	visit_age_mo	visit_age_mo	0.000110263	0.000110263	3.12666e-05	740	50	0.000447159	0.00193769	PWY-5088	SCFA
AEROBACTINSYN.PWY-.aerobactin.biosynthesis	symptoms	AP	0.000910936	0.000910936	0.000259331	740	161	0.000470791	0.00203495
PWY-6147..6.hydroxymethyl.dihydropterin.diphosphate.biosynthesis.I	mode_of_delivery	Vaginal	0.00144741	0.00144741	0.000412219	740	734	0.000473217	0.0020403
PWY-6906..chitin.derivatives.degradation	mode_of_delivery	Vaginal	0.00119462	0.00119462	0.000340682	740	173	0.000481534	0.00207096
PWY-5130..2.oxobutanoate.degradation.I	visit_age_mo	visit_age_mo	0.00052966	0.00052966	0.000151126	740	495	0.000484701	0.00207678
PWY-5659..GDP.mannose.biosynthesis	visit_age_mo	visit_age_mo	-0.000547429	0.000547429	0.00015621	740	733	0.000485308	0.00207678
PWY-5104..L.isoleucine.biosynthesis.IV	mode_of_delivery	Vaginal	0.000918469	0.000918469	0.000262989	740	328	0.000507284	0.00216542
HISDEG.PWY-.L.histidine.degradation.I	mode_of_delivery	Vaginal	0.00181296	0.00181296	0.000519242	740	665	0.000508926	0.00216704
CENTFERM.PWY-.pyruvate.fermentation.to.butanoate	mode_of_delivery	Vaginal	-0.0007483	0.0007483	0.00021478	740	353	0.000523198	0.0022223	CENTFERM-PWY	SCFA
GLYOXYLATE.BYPASS..glyoxylate.cycle	mode_of_delivery	Vaginal	-0.00138575	0.00138575	0.000398243	740	657	0.000531636	0.00225256
PWY-6590..superpathway.of.Clostridium.acetobutylicum.acidogenic.fermentation	mode_of_delivery	Vaginal	-0.000832848	0.000832848	0.000239452	740	353	0.000534619	0.00225962
SALVADEHYPOX.PWY-.adenosine.nucleotides.degradation.II	probiotics_firstyr	probiotics_firstyr	-0.00117905	0.00117905	0.000339094	740	616	0.000536781	0.00226318
PWY-822..fructan.biosynthesis	mode_of_delivery	Vaginal	-0.000663247	0.000663247	0.000191151	740	316	0.00055131	0.00231874
P185.PWY-.formaldehyde.assimilation.III..dihydroxyacetone.cycle.	probiotics_firstyr	probiotics_firstyr	0.000768668	0.000768668	0.000221695	740	551	0.000556417	0.0023345
PWY-7115..C4.photosynthetic.carbon.assimilation.cycle..NAD.ME.type	mode_of_delivery	Vaginal	-0.00118776	0.00118776	0.000346611	740	707	0.000644788	0.00269867
PWY-6630..superpathway.of.L.tyrosine.biosynthesis	visit_age_mo	visit_age_mo	-0.000584944	0.000584944	0.000170806	740	719	0.000649863	0.0027133
GLUCUROCAT.PWY-.superpathway.of..beta..D.glucuronosides.degradation	visit_age_mo	visit_age_mo	0.000564062	0.000564062	0.000165461	740	635	0.000687516	0.00286354
PWY-6285..superpathway.of.fatty.acids.biosynthesis..E..coli.	mode_of_delivery	Vaginal	-0.0016106	0.0016106	0.000473996	740	570	0.000715576	0.00297319
ALLANTOINDEG.PWY-.superpathway.of.allantoin.degradation.in.yeast	mode_of_delivery	Vaginal	-0.000354831	0.000354831	0.000104647	740	112	0.000734263	0.00304347
PWY-2942..L.lysine.biosynthesis.III	mode_of_delivery	Vaginal	0.00163441	0.00163441	0.000482315	740	688	0.000739727	0.00305873
P441.PWY-.superpathway.of.N.acetylneuraminate.degradation	mode_of_delivery	Vaginal	-0.00126209	0.00126209	0.000373559	740	707	0.000767096	0.00316427
PWY-5156..superpathway.of.fatty.acid.biosynthesis.II..plant.	mode_of_delivery	Vaginal	-0.000366374	0.000366374	0.000108537	740	50	0.000775313	0.0031905
PWY-5180..toluene.degradation.I..aerobic...via.o.cresol.	mode_of_delivery	Vaginal	-0.000965239	0.000965239	0.000286706	740	161	0.000800447	0.00328604
PWY-5656..mannosylglycerate.biosynthesis.I	visit_age_mo	visit_age_mo	-0.000556392	0.000556392	0.000165601	740	470	0.000820155	0.00335891
PWY-7111..pyruvate.fermentation.to.isobutanol..engineered.	mode_of_delivery	Vaginal	-0.00136092	0.00136092	0.000405186	740	739	0.000823325	0.00336387
PWY-6906..chitin.derivatives.degradation	visit_age_mo	visit_age_mo	0.000530062	0.000530062	0.000157926	740	173	0.000830287	0.00338426
PWY-1861..formaldehyde.assimilation.II..assimilatory.RuMP.Cycle.	probiotics_firstyr	probiotics_firstyr	-0.000829138	0.000829138	0.000247356	740	592	0.00084332	0.00342923
PWY-7211..superpathway.of.pyrimidine.deoxyribonucleotides.de.novo.biosynthesis	probiotics_firstyr	probiotics_firstyr	0.000740683	0.000740683	0.000221124	740	499	0.000850509	0.00345029
PWY-8190..L.glutamate.degradation.XI..reductive.Stickland.reaction.	visit_age_mo	visit_age_mo	0.000109745	0.000109745	3.28786e-05	740	67	0.000886684	0.00358856	PWY-8190	SCFA
OANTIGEN.PWY-.O.antigen.building.blocks.biosynthesis..E..coli.	visit_age_mo	visit_age_mo	0.000533502	0.000533502	0.000160096	740	731	0.000904107	0.00365047
PWY-7208..superpathway.of.pyrimidine.nucleobases.salvage	mode_of_delivery	Vaginal	-0.00129215	0.00129215	0.000388287	740	734	0.00091883	0.0037012
PWY-7013...S..propane.1.2.diol.degradation	visit_age_mo	visit_age_mo	-0.0008677	0.0008677	0.00026147	740	536	0.000949468	0.00381521	PWY-7013	SCFA
PWY-7198..pyrimidine.deoxyribonucleotides.de.novo.biosynthesis.IV	probiotics_firstyr	probiotics_firstyr	0.000777499	0.000777499	0.000234334	740	673	0.000951579	0.00381521
PWY-7316..dTDP.N.acetylviosamine.biosynthesis	visit_age_mo	visit_age_mo	0.000475986	0.000475986	0.000144224	740	117	0.0010123	0.00404918
PWY-6545..pyrimidine.deoxyribonucleotides.de.novo.biosynthesis.III	probiotics_firstyr	probiotics_firstyr	0.000630058	0.000630058	0.000190986	740	570	0.00101713	0.00405905
PWY-6292..superpathway.of.L.cysteine.biosynthesis..mammalian.	mode_of_delivery	Vaginal	-0.00101257	0.00101257	0.000307493	740	505	0.00103877	0.00412622
PWY-7197..pyrimidine.deoxyribonucleotide.phosphorylation	mode_of_delivery	Vaginal	-0.00124322	0.00124322	0.000377525	740	731	0.00103837	0.00412622
HCAMHPDEG.PWY-.3.phenylpropanoate.and.3..3.hydroxyphenyl.propanoate.degradation.to.2.hydroxypentadienoate	visit_age_mo	visit_age_mo	-0.000498039	0.000498039	0.000151415	740	393	0.0010525	0.0041615	HCAMHPDEG-PWY	Propiote
PWY-6690..cinnamate.and.3.hydroxycinnamate.degradation.to.2.hydroxypentadienoate	visit_age_mo	visit_age_mo	-0.000498039	0.000498039	0.000151415	740	393	0.0010525	0.0041615
PWY-5850..superpathway.of.menaquinol.6.biosynthesis	mode_of_delivery	Vaginal	-0.00137021	0.00137021	0.000416842	740	584	0.00106024	0.00417287
PWY-5896..superpathway.of.menaquinol.10.biosynthesis	mode_of_delivery	Vaginal	-0.00137021	0.00137021	0.000416842	740	584	0.00106024	0.00417287
PWY-7874..L.threonate.degradation	probiotics_firstyr	probiotics_firstyr	-0.000305608	0.000305608	9.31542e-05	740	330	0.00108446	0.00425843
THISYN.PWY-.superpathway.of.thiamine.diphosphate.biosynthesis.I	visit_age_mo	visit_age_mo	0.000547707	0.000547707	0.000167145	740	702	0.00109908	0.00430599
PWY-7184..pyrimidine.deoxyribonucleotides.de.novo.biosynthesis.I	probiotics_firstyr	probiotics_firstyr	0.000714025	0.000714025	0.000218107	740	674	0.00111103	0.00434288
AEROBACTINSYN.PWY-.aerobactin.biosynthesis	probiotics_firstyr	probiotics_firstyr	-0.000414274	0.000414274	0.000126729	740	161	0.00112965	0.00440565
GLCMANNANAUT.PWY-.superpathway.of.N.acetylglucosamine..N.acetylmannosamine.and.N.acetylneuraminate.degradation	visit_age_mo	visit_age_mo	-0.000531223	0.000531223	0.000163748	740	723	0.00123134	0.00479134
PWY-7805...aminomethyl.phosphonate.degradation	probiotics_firstyr	probiotics_firstyr	-0.000298145	0.000298145	9.194e-05	740	134	0.00123697	0.00480234
PWY-6353..purine.nucleotides.degradation.II..aerobic.	probiotics_firstyr	probiotics_firstyr	-0.000945553	0.000945553	0.000293509	740	613	0.00133121	0.00515657
X1CMET2.PWY-.folate.transformations.III..E..coli.	visit_age_mo	visit_age_mo	0.0005039	0.0005039	0.000157647	740	727	0.00145116	0.00560855
PWY-6803..phosphatidylcholine.acyl.editing	mode_of_delivery	Vaginal	-0.00123346	0.00123346	0.000386453	740	670	0.00147436	0.00568539
P221.PWY-.octane.oxidation	symptoms	AP	-0.000758888	0.000758888	0.000237968	740	379	0.00148808	0.00572545
PWY-6807..xyloglucan.degradation.II..exoglucanase.	mode_of_delivery	Vaginal	0.000515362	0.000515362	0.000161843	740	48	0.00151208	0.00580478
PWY-6606..guanosine.nucleotides.degradation.II	mode_of_delivery	Vaginal	-0.00129254	0.00129254	0.000407133	740	706	0.00156227	0.00598406
PWY-6629..superpathway.of.L.tryptophan.biosynthesis	mode_of_delivery	Vaginal	-0.000910357	0.000910357	0.000286964	740	733	0.0015749	0.00601899
GLYCOGENSYNTH.PWY-.glycogen.biosynthesis.I..from.ADP.D.Glucose.	mode_of_delivery	Vaginal	-0.00104929	0.00104929	0.000330983	740	739	0.00158652	0.00604993
PWY-7237..myo...chiro..and.scyllo.inositol.degradation	probiotics_firstyr	probiotics_firstyr	0.00130575	0.00130575	0.000412935	740	500	0.00163062	0.00620432
PWY-6126..superpathway.of.adenosine.nucleotides.de.novo.biosynthesis.II	visit_age_mo	visit_age_mo	-0.000595865	0.000595865	0.000188711	740	735	0.001656	0.00628693
PWY-7873..D.erythronate.degradation.II	probiotics_firstyr	probiotics_firstyr	-0.000266039	0.000266039	8.44133e-05	740	217	0.00168956	0.00640019
TRPSYN.PWY-.L.tryptophan.biosynthesis	mode_of_delivery	Vaginal	-0.00105944	0.00105944	0.000336473	740	733	0.0017065	0.0064501
PWY-7783..plasmalogen.degradation	mode_of_delivery	Vaginal	-0.000291363	0.000291363	9.27511e-05	740	77	0.00174915	0.00659681
PWY-7873..D.erythronate.degradation.II	visit_age_mo	visit_age_mo	-0.000218341	0.000218341	6.97052e-05	740	217	0.00180296	0.00678484
PWY-7446..sulfoquinovose.degradation.I	mode_of_delivery	Vaginal	-0.000781938	0.000781938	0.000250381	740	274	0.00186046	0.00698589
PWY-821..superpathway.of.sulfur.amino.acid.biosynthesis..Saccharomyces.cerevisiae.	mode_of_delivery	Vaginal	-0.00107773	0.00107773	0.00034771	740	602	0.00201232	0.0075396
PWY-6292..superpathway.of.L.cysteine.biosynthesis..mammalian.	symptoms	AP	-0.00109278	0.00109278	0.000353234	740	505	0.00205209	0.00767188
PWY-5840..superpathway.of.menaquinol.7.biosynthesis	mode_of_delivery	Vaginal	-0.00109725	0.00109725	0.000355964	740	664	0.00212956	0.00794419
PWY-7345..superpathway.of.anaerobic.sucrose.degradation	mode_of_delivery	Vaginal	-0.00112312	0.00112312	0.000366213	740	714	0.00224251	0.0083474
PWY-7208..superpathway.of.pyrimidine.nucleobases.salvage	visit_age_mo	visit_age_mo	-0.000551695	0.000551695	0.000179994	740	734	0.00225579	0.00837864
PWY-5189..tetrapyrrole.biosynthesis.II..from.glycine.	mode_of_delivery	Vaginal	-0.00111287	0.00111287	0.000364568	740	663	0.00235073	0.00871244
POLYAMINSYN3.PWY-.superpathway.of.polyamine.biosynthesis.II	visit_age_mo	visit_age_mo	0.000170075	0.000170075	5.59239e-05	740	89	0.00244017	0.00900391
PWY-5677..succinate.fermentation.to.butanoate	mode_of_delivery	Vaginal	-0.000352541	0.000352541	0.000115922	740	159	0.00244018	0.00900391	PWY-5677	SCFA
PWY-.1277..3.phenylpropanoate.and.3..3.hydroxyphenyl.propanoate.degradation	visit_age_mo	visit_age_mo	-0.000495433	0.000495433	0.00016294	740	382	0.00244512	0.00900391
PWY-7323..superpathway.of.GDP.mannose.derived.O.antigen.building.blocks.biosynthesis	mode_of_delivery	Vaginal	0.0011472	0.0011472	0.000377705	740	638	0.00247154	0.0090817
PWY-7409..phospholipid.remodeling..phosphatidylethanolamine..yeast.	probiotics_firstyr	probiotics_firstyr	-0.000433321	0.000433321	0.000142931	740	357	0.00251737	0.00923035
FUCCAT.PWY-.fucose.degradation	mode_of_delivery	Vaginal	-0.00116364	0.00116364	0.000384358	740	677	0.00255204	0.00933752
PWY-7391..isoprene.biosynthesis.II..engineered.	mode_of_delivery	Vaginal	-0.00040728	0.00040728	0.000134637	740	154	0.00257287	0.00939373
PWY-5747..2.methylcitrate.cycle.II	mode_of_delivery	Vaginal	-0.000718545	0.000718545	0.000237759	740	431	0.00259704	0.00946183
PWY-5656..mannosylglycerate.biosynthesis.I	probiotics_firstyr	probiotics_firstyr	-0.000605598	0.000605598	0.000200544	740	470	0.00261718	0.00951501
P42.PWY-.incomplete.reductive.TCA.cycle	visit_age_mo	visit_age_mo	-0.000421773	0.000421773	0.000139951	740	595	0.00266941	0.00968436
PWY-5104..L.isoleucine.biosynthesis.IV	probiotics_firstyr	probiotics_firstyr	-0.00044473	0.00044473	0.000147635	740	328	0.00268113	0.00970638
UNINTEGRATED	mode_of_delivery	Vaginal	0.0195036	0.0195036	0.00647837	740	740	0.00269689	0.00974288
PANTO.PWY-.phosphopantothenate.biosynthesis.I	visit_age_mo	visit_age_mo	0.000469373	0.000469373	0.000155993	740	737	0.00271126	0.00977422
CATECHOL.ORTHO.CLEAVAGE.PWY-.catechol.degradation.to..beta..ketoadipate	symptoms	AP	-0.000742529	0.000742529	0.000247368	740	200	0.00277558	0.00998511
PRPP.PWY-.superpathway.of.histidine..purine..and.pyrimidine.biosynthesis	mode_of_delivery	Vaginal	-0.00121291	0.00121291	0.00040464	740	603	0.00281365	0.0101009
PWY-7688..dTDP..alpha..D.ravidosamine.and.dTDP.4.acetyl..alpha..D.ravidosamine.biosynthesis	probiotics_firstyr	probiotics_firstyr	-0.000333159	0.000333159	0.000111413	740	91	0.00287994	0.0103173
PWY-5180..toluene.degradation.I..aerobic...via.o.cresol.	symptoms	AP	-0.000984524	0.000984524	0.000329355	740	161	0.00288991	0.0103314
PWY-6.367..ketogenesis	mode_of_delivery	Vaginal	-0.000261608	0.000261608	8.75763e-05	740	124	0.00290909	0.0103784
PWY-5265..peptidoglycan.biosynthesis.II..staphylococci.	mode_of_delivery	Vaginal	-0.0011111	0.0011111	0.000372176	740	407	0.0029259	0.0104167
PWY-7409..phospholipid.remodeling..phosphatidylethanolamine..yeast.	visit_age_mo	visit_age_mo	-0.000351241	0.000351241	0.000118027	740	357	0.00301671	0.0107178
FOLSYN.PWY-.superpathway.of.tetrahydrofolate.biosynthesis.and.salvage	mode_of_delivery	Vaginal	-0.00109686	0.00109686	0.000369913	740	655	0.00312297	0.0110589
PWY-7616..methanol.oxidation.to.carbon.dioxide	mode_of_delivery	Vaginal	-0.000230426	0.000230426	7.77174e-05	740	111	0.00312563	0.0110589
PWY-5686..UMP.biosynthesis.I	visit_age_mo	visit_age_mo	0.000445187	0.000445187	0.000150292	740	739	0.0031535	0.0111346
PWY-6901..superpathway.of.glucose.and.xylose.degradation	visit_age_mo	visit_age_mo	-0.000394883	0.000394883	0.000133684	740	728	0.00323839	0.0114108
PWY-7874..L.threonate.degradation	visit_age_mo	visit_age_mo	-0.000227007	0.000227007	7.69231e-05	740	330	0.00326724	0.0114889
PWY-6185..4.methylcatechol.degradation..ortho.cleavage.	symptoms	AP	-0.000781443	0.000781443	0.000265321	740	210	0.00332862	0.0116808
PWY-6922..L.N.delta..acetylornithine.biosynthesis	visit_age_mo	visit_age_mo	-0.000279138	0.000279138	9.48068e-05	740	302	0.0033392	0.011694
PWY-7807..glyphosate.degradation.III	probiotics_firstyr	probiotics_firstyr	-0.000325481	0.000325481	0.000110629	740	200	0.00336263	0.0117521
PWY-7184..pyrimidine.deoxyribonucleotides.de.novo.biosynthesis.I	mode_of_delivery	Vaginal	-0.00114237	0.00114237	0.000388525	740	674	0.00338205	0.0117959
PWY-7385..1.3.propanediol.biosynthesis..engineered.	mode_of_delivery	Vaginal	-0.000829008	0.000829008	0.000282203	740	365	0.00341074	0.0118673
PWY-7761..NAD.salvage.pathway.II..PNC.IV.cycle.	visit_age_mo	visit_age_mo	-0.000390425	0.000390425	0.000132928	740	713	0.00341636	0.0118673
PWY-3001..superpathway.of.L.isoleucine.biosynthesis.I	mode_of_delivery	Vaginal	-0.000985886	0.000985886	0.000336801	740	738	0.00352583	0.0122229
PWY-6435..4.hydroxybenzoate.biosynthesis.III..plants.	probiotics_firstyr	probiotics_firstyr	-0.000226414	0.000226414	7.74929e-05	740	109	0.00358765	0.0124121
PWY-7198..pyrimidine.deoxyribonucleotides.de.novo.biosynthesis.IV	mode_of_delivery	Vaginal	-0.0012118	0.0012118	0.00041743	740	673	0.00380682	0.0131439
ARGININE.SYN4.PWY-.L.ornithine.biosynthesis.II	probiotics_firstyr	probiotics_firstyr	-0.000741379	0.000741379	0.000255606	740	702	0.00383714	0.0131573
GOLPDLCAT.PWY-.superpathway.of.glycerol.degradation.to.1.3.propanediol	visit_age_mo	visit_age_mo	0.000441932	0.000441932	0.000152301	740	548	0.00382249	0.0131573
P164.PWY-.purine.nucleobases.degradation.I..anaerobic.	symptoms	AP	-0.00118659	0.00118659	0.000409146	740	375	0.0038409	0.0131573
PWY-7245..superpathway.of.NAD.NADP...NADH.NADPH.interconversion..yeast.	mode_of_delivery	Vaginal	-0.000439079	0.000439079	0.0001514	740	83	0.00384137	0.0131573
PWY-.41..allantoin.degradation.IV..anaerobic.	probiotics_firstyr	probiotics_firstyr	-0.000238861	0.000238861	8.2425e-05	740	274	0.00386832	0.0132232
PWY-7446..sulfoquinovose.degradation.I	probiotics_firstyr	probiotics_firstyr	0.000407134	0.000407134	0.000140557	740	274	0.00388465	0.0132526
KETOGLUCONMET.PWY-.ketogluconate.metabolism	symptoms	AP	0.00143253	0.00143253	0.000496192	740	578	0.00400292	0.013629
PWY-7185..UTP.and.CTP.dephosphorylation.I	mode_of_delivery	Vaginal	-0.00181515	0.00181515	0.000629012	740	477	0.00401963	0.0136588
PWY-5862..superpathway.of.demethylmenaquinol.9.biosynthesis	mode_of_delivery	Vaginal	-0.00109542	0.00109542	0.000379864	740	622	0.004045	0.0137178
PWY-5415..catechol.degradation.I..meta.cleavage.pathway.	symptoms	AP	-0.000393188	0.000393188	0.000136742	740	190	0.00415186	0.0139972
PWY-801..homocysteine.and.cysteine.interconversion	visit_age_mo	visit_age_mo	-0.000307202	0.000307202	0.000106791	740	429	0.0041356	0.0139972
THISYNARA.PWY-.superpathway.of.thiamine.diphosphate.biosynthesis.III..eukaryotes.	mode_of_delivery	Vaginal	0.00111215	0.00111215	0.00038673	740	719	0.00414693	0.0139972
PWY-6215..4.chlorobenzoate.degradation	visit_age_mo	visit_age_mo	6.11217e-05	6.11217e-05	2.12784e-05	740	46	0.0041901	0.0140984
PENTOSE.P.PWY-.pentose.phosphate.pathway	mode_of_delivery	Vaginal	-0.000879938	0.000879938	0.00030726	740	736	0.00430484	0.0144562
PWY-241..C4.photosynthetic.carbon.assimilation.cycle..NADP.ME.type	visit_age_mo	visit_age_mo	0.000422574	0.000422574	0.000148035	740	699	0.00443104	0.0148509
GALACTITOLCAT.PWY-.galactitol.degradation	visit_age_mo	visit_age_mo	-0.000568148	0.000568148	0.000200388	740	522	0.00470497	0.0157076
PWY-6612..superpathway.of.tetrahydrofolate.biosynthesis	mode_of_delivery	Vaginal	-0.000973538	0.000973538	0.000343303	740	655	0.00469675	0.0157076
X3.HYDROXYPHENYLACETATE.DEGRADATION.PWY-.4.hydroxyphenylacetate.degradation	symptoms	AP	-0.000704069	0.000704069	0.000249331	740	236	0.00487383	0.0162398	3-HYDROXYPHENYLACETATE-DEGRADATION-PWY	Acetate
GLUCUROCAT.PWY-.superpathway.of..beta..D.glucuronosides.degradation	symptoms	AP	0.0011565	0.0011565	0.000410033	740	635	0.00492388	0.0163748
GLYCOCAT.PWY-.glycogen.degradation.I	probiotics_firstyr	probiotics_firstyr	0.000733366	0.000733366	0.000260966	740	680	0.00508283	0.0168707
COLANSYN.PWY-.colanic.acid.building.blocks.biosynthesis	symptoms	AP	0.00125553	0.00125553	0.000448182	740	663	0.00522224	0.0172999
PWY-7357..thiamine.phosphate.formation.from.pyrithiamine.and.oxythiamine..yeast.	visit_age_mo	visit_age_mo	0.000380765	0.000380765	0.0001367	740	737	0.00548369	0.018131
PWY-6182..superpathway.of.salicylate.degradation	symptoms	AP	-0.000610549	0.000610549	0.000219407	740	147	0.00552882	0.0182451
PWY-7204..pyridoxal.5..phosphate.salvage.II..plants.	mode_of_delivery	Vaginal	-0.000971878	0.000971878	0.000349697	740	547	0.00558841	0.0184064
CITRULBIO.PWY-.L.citrulline.biosynthesis	mode_of_delivery	Vaginal	0.00116722	0.00116722	0.000421688	740	706	0.00578244	0.0190089
PWY-8187..L.arginine.degradation.XIII..reductive.Stickland.reaction.	probiotics_firstyr	probiotics_firstyr	-0.000597451	0.000597451	0.000216319	740	727	0.00589003	0.0193256
GLYCOL.GLYOXDEG.PWY-.superpathway.of.glycol.metabolism.and.degradation	mode_of_delivery	Vaginal	-0.000635446	0.000635446	0.000230222	740	451	0.0059214	0.0193915
PWY-5415..catechol.degradation.I..meta.cleavage.pathway.	mode_of_delivery	Vaginal	-0.000328469	0.000328469	0.000119035	740	190	0.00593434	0.0193968
PWY-922..mevalonate.pathway.I..eukaryotes.and.bacteria.	mode_of_delivery	Vaginal	-0.000503774	0.000503774	0.000182687	740	335	0.00596769	0.0194687
GLUCOSE1PMETAB.PWY-.glucose.and.glucose.1.phosphate.degradation	visit_age_mo	visit_age_mo	-0.000653872	0.000653872	0.00023719	740	688	0.00598279	0.019481
PWY-7209..superpathway.of.pyrimidine.ribonucleosides.degradation	probiotics_firstyr	probiotics_firstyr	-0.000401462	0.000401462	0.00014578	740	432	0.00603464	0.0196126
PWY-7873..D.erythronate.degradation.II	symptoms	AP	0.00047335	0.00047335	0.000172738	740	217	0.00628767	0.0203963
GLYCOLYSIS..glycolysis.I..from.glucose.6.phosphate.	visit_age_mo	visit_age_mo	-0.000362708	0.000362708	0.000132453	740	735	0.00632351	0.0204578
PWY-6125..superpathway.of.guanosine.nucleotides.de.novo.biosynthesis.II	visit_age_mo	visit_age_mo	-0.000542859	0.000542859	0.000198267	740	732	0.00633047	0.0204578
PWY-5104..L.isoleucine.biosynthesis.IV	visit_age_mo	visit_age_mo	0.000333476	0.000333476	0.000121911	740	328	0.00638063	0.0205529
VALSYN.PWY-.L.valine.biosynthesis	visit_age_mo	visit_age_mo	-0.000417753	0.000417753	0.00015273	740	740	0.00638385	0.0205529
GLYCOCAT.PWY-.glycogen.degradation.I	symptoms	AP	-0.00145994	0.00145994	0.000534024	740	680	0.00641058	0.0205704
OANTIGEN.PWY-.O.antigen.building.blocks.biosynthesis..E..coli.	symptoms	AP	0.00108456	0.00108456	0.000396736	740	731	0.00641326	0.0205704
GALACTITOLCAT.PWY-.galactitol.degradation	symptoms	AP	0.00135404	0.00135404	0.000496587	740	522	0.00654975	0.020969
HEXITOLDEGSUPER.PWY-.superpathway.of.hexitol.degradation..bacteria.	symptoms	AP	0.00151952	0.00151952	0.000557705	740	508	0.00659124	0.0210625
PWY-6823..molybdopterin.biosynthesis	visit_age_mo	visit_age_mo	-0.000465251	0.000465251	0.000171085	740	728	0.00669403	0.0213507
PYRIDOXSYN.PWY-.pyridoxal.5..phosphate.biosynthesis.I	mode_of_delivery	Vaginal	0.00107154	0.00107154	0.00039412	740	701	0.00670632	0.0213507
PWY-6317..D.galactose.degradation.I..Leloir.pathway.	mode_of_delivery	Vaginal	-0.000919311	0.000919311	0.000338804	740	735	0.00681563	0.0216586
PWY-5897..superpathway.of.menaquinol.11.biosynthesis	mode_of_delivery	Vaginal	-0.000918089	0.000918089	0.000339091	740	696	0.0069367	0.0218812
PWY-5898..superpathway.of.menaquinol.12.biosynthesis	mode_of_delivery	Vaginal	-0.000918089	0.000918089	0.000339091	740	696	0.0069367	0.0218812
PWY-5899..superpathway.of.menaquinol.13.biosynthesis	mode_of_delivery	Vaginal	-0.000918089	0.000918089	0.000339091	740	696	0.0069367	0.0218812
PWY-LZ.257..superpathway.of.fermentation..Chlamydomonas.reinhardtii.	visit_age_mo	visit_age_mo	-0.000500023	0.000500023	0.000184584	740	641	0.00690723	0.0218812
PWY-5910..superpathway.of.geranylgeranyldiphosphate.biosynthesis.I..via.mevalonate.	mode_of_delivery	Vaginal	-0.000494326	0.000494326	0.000183109	740	311	0.00710137	0.0223186
PWY-.461..L.lysine.degradation.I	mode_of_delivery	Vaginal	-0.000642819	0.000642819	0.000238082	740	404	0.00709363	0.0223186
PWY-6293..superpathway.of.L.cysteine.biosynthesis..fungi.	mode_of_delivery	Vaginal	-0.000604475	0.000604475	0.000224234	740	406	0.00718405	0.0225372
PWY-5464..superpathway.of.cytosolic.glycolysis..plants...pyruvate.dehydrogenase.and.TCA.cycle	symptoms	AP	-0.000364819	0.000364819	0.000135481	740	109	0.00724767	0.0226953
P562.PWY-.myo.inositol.degradation.I	mode_of_delivery	Vaginal	-0.000601951	0.000601951	0.000223926	740	287	0.00734711	0.0229647
COLANSYN.PWY-.colanic.acid.building.blocks.biosynthesis	probiotics_firstyr	probiotics_firstyr	-0.000588234	0.000588234	0.000219017	740	663	0.00739918	0.0230854
PWY-7392..taxadiene.biosynthesis..engineered.	visit_age_mo	visit_age_mo	0.000514505	0.000514505	0.000191833	740	582	0.00748172	0.0233006
PWY-6527..stachyose.degradation	mode_of_delivery	Vaginal	-0.00099281	0.00099281	0.000370299	740	728	0.00750259	0.0233233
PWY-1861..formaldehyde.assimilation.II..assimilatory.RuMP.Cycle.	symptoms	AP	0.00135639	0.00135639	0.000506172	740	592	0.00753379	0.0233306
PWY-5417..catechol.degradation.III..ortho.cleavage.pathway.	symptoms	AP	-0.000741281	0.000741281	0.000276684	740	195	0.00754572	0.0233306
PWY-5431..aromatic.compounds.degradation.via..beta..ketoadipate	symptoms	AP	-0.000741281	0.000741281	0.000276684	740	195	0.00754572	0.0233306
PWY-7409..phospholipid.remodeling..phosphatidylethanolamine..yeast.	symptoms	AP	0.00078255	0.00078255	0.000292484	740	357	0.00762719	0.02354
PROTOCATECHUATE.ORTHO.CLEAVAGE.PWY-.protocatechuate.degradation.II..ortho.cleavage.pathway.	symptoms	AP	-0.000843157	0.000843157	0.000315251	740	266	0.00764919	0.0235656
PWY-7345..superpathway.of.anaerobic.sucrose.degradation	visit_age_mo	visit_age_mo	-0.000452819	0.000452819	0.000169761	740	714	0.00781263	0.0240259
GLYCOL.GLYOXDEG.PWY-.superpathway.of.glycol.metabolism.and.degradation	symptoms	AP	0.00070474	0.00070474	0.000264468	740	451	0.00787373	0.0241652
PWY-.1533..methylphosphonate.degradation.I	probiotics_firstyr	probiotics_firstyr	-0.000247631	0.000247631	9.29472e-05	740	201	0.00788606	0.0241652
PWY-5861..superpathway.of.demethylmenaquinol.8.biosynthesis.I	mode_of_delivery	Vaginal	-0.000964203	0.000964203	0.000363246	740	663	0.00811668	0.0248275
PWY-6182..superpathway.of.salicylate.degradation	visit_age_mo	visit_age_mo	-0.00023424	0.00023424	8.85377e-05	740	147	0.00832774	0.0254277
NONMEVIPP.PWY-.methylerythritol.phosphate.pathway.I	mode_of_delivery	Vaginal	0.000755793	0.000755793	0.000285884	740	737	0.00837517	0.0255272
HISTSYN.PWY-.L.histidine.biosynthesis	visit_age_mo	visit_age_mo	0.000416056	0.000416056	0.000158014	740	738	0.00864064	0.0262896
PWY-7389..superpathway.of.anaerobic.energy.metabolism..invertebrates.	visit_age_mo	visit_age_mo	7.55658e-05	7.55658e-05	2.87778e-05	740	38	0.00882334	0.026798	PWY-7389	Succite
PWY-6168..flavin.biosynthesis.III..fungi.	symptoms	AP	0.00137405	0.00137405	0.000526434	740	482	0.00923555	0.0280004
PWY-6215..4.chlorobenzoate.degradation	probiotics_firstyr	probiotics_firstyr	-6.71428e-05	6.71428e-05	2.57683e-05	740	46	0.00935603	0.0283156
ARGDEG.PWY-.superpathway.of.L.arginine..putrescine..and.4.aminobutanoate.degradation	symptoms	AP	-0.000625956	0.000625956	0.00024074	740	134	0.00950591	0.0285898
ORNARGDEG.PWY-.superpathway.of.L.arginine.and.L.ornithine.degradation	symptoms	AP	-0.000625956	0.000625956	0.00024074	740	134	0.00950591	0.0285898
PWY-5464..superpathway.of.cytosolic.glycolysis..plants...pyruvate.dehydrogenase.and.TCA.cycle	visit_age_mo	visit_age_mo	0.000142137	0.000142137	5.46709e-05	740	109	0.00951329	0.0285898
THISYN.PWY-.superpathway.of.thiamine.diphosphate.biosynthesis.I	probiotics_firstyr	probiotics_firstyr	-0.000526437	0.000526437	0.000202414	740	702	0.00948773	0.0285898
DARABCATK12.PWY-.D.arabinose.degradation.I	symptoms	AP	0.000670615	0.000670615	0.000258021	740	456	0.00953497	0.0286049
LACTOSECAT.PWY-.lactose.and.galactose.degradation.I	mode_of_delivery	Vaginal	-0.00100255	0.00100255	0.000385983	740	638	0.00958147	0.0286942
PWY-6901..superpathway.of.glucose.and.xylose.degradation	probiotics_firstyr	probiotics_firstyr	-0.000418308	0.000418308	0.000161892	740	728	0.00996147	0.0297285
PWY-922..mevalonate.pathway.I..eukaryotes.and.bacteria.	probiotics_firstyr	probiotics_firstyr	0.000264997	0.000264997	0.000102555	740	335	0.00995966	0.0297285
P125.PWY-.superpathway.of..R.R..butanediol.biosynthesis	mode_of_delivery	Vaginal	-0.00055053	0.00055053	0.000215996	740	370	0.0110114	0.0327538
PWY-.845..superpathway.of.pyridoxal.5..phosphate.biosynthesis.and.salvage	mode_of_delivery	Vaginal	0.0010152	0.0010152	0.000398316	740	700	0.0110134	0.0327538
GALACT.GLUCUROCAT.PWY-.superpathway.of.hexuronide.and.hexuronate.degradation	probiotics_firstyr	probiotics_firstyr	-0.000460737	0.000460737	0.000180851	740	498	0.0110492	0.0327723
PWY-6895..superpathway.of.thiamine.diphosphate.biosynthesis.II	probiotics_firstyr	probiotics_firstyr	-0.000597238	0.000597238	0.000234457	740	649	0.0110578	0.0327723
PWY-7117..C4.photosynthetic.carbon.assimilation.cycle..PEPCK.type	mode_of_delivery	Vaginal	-0.00105829	0.00105829	0.000417177	740	722	0.011393	0.0337076
PHOSLIPSYN.PWY-.superpathway.of.phospholipid.biosynthesis.I..bacteria.	probiotics_firstyr	probiotics_firstyr	-0.000568419	0.000568419	0.000224479	740	719	0.0115431	0.0340929
GLCMANNANAUT.PWY-.superpathway.of.N.acetylglucosamine..N.acetylmannosamine.and.N.acetylneuraminate.degradation	probiotics_firstyr	probiotics_firstyr	-0.000500757	0.000500757	0.0001983	740	723	0.0117709	0.034706
PWY-6562..norspermidine.biosynthesis	mode_of_delivery	Vaginal	-0.000285187	0.000285187	0.000113659	740	90	0.0123167	0.0362529
PWY-5659..GDP.mannose.biosynthesis	probiotics_firstyr	probiotics_firstyr	-0.000474238	0.000474238	0.000189172	740	733	0.0123936	0.0364168
FOLSYN.PWY-.superpathway.of.tetrahydrofolate.biosynthesis.and.salvage	probiotics_firstyr	probiotics_firstyr	-0.00051946	0.00051946	0.000207659	740	655	0.012583	0.0369102
PWY-5464..superpathway.of.cytosolic.glycolysis..plants...pyruvate.dehydrogenase.and.TCA.cycle	mode_of_delivery	Vaginal	-0.000293752	0.000293752	0.000117937	740	109	0.0129671	0.037972
PWY-I9..L.cysteine.biosynthesis.VI..from.L.methionine.	mode_of_delivery	Vaginal	-0.00108401	0.00108401	0.000437291	740	734	0.0134011	0.0391759
KETOGLUCONMET.PWY-.ketogluconate.metabolism	probiotics_firstyr	probiotics_firstyr	-0.000599831	0.000599831	0.000242479	740	578	0.0135952	0.0396758
PWY-6612..superpathway.of.tetrahydrofolate.biosynthesis	probiotics_firstyr	probiotics_firstyr	-0.000475839	0.000475839	0.000192721	740	655	0.0137731	0.0401266
PENTOSE.P.PWY-.pentose.phosphate.pathway	probiotics_firstyr	probiotics_firstyr	-0.000425567	0.000425567	0.000172487	740	736	0.0138429	0.0402618
PWY-8131..5..deoxyadenosine.degradation.II	visit_age_mo	visit_age_mo	-0.00040057	0.00040057	0.000163022	740	584	0.0142343	0.0413301
PWY-7389..superpathway.of.anaerobic.energy.metabolism..invertebrates.	mode_of_delivery	Vaginal	-0.000152482	0.000152482	6.208e-05	740	38	0.0142708	0.0413661	PWY-7389	Succite
PWY-5994..palmitate.biosynthesis..type.I.fatty.acid.synthase.	mode_of_delivery	Vaginal	0.000690548	0.000690548	0.00028307	740	216	0.0149432	0.0432421
PWY-5154..L.arginine.biosynthesis.III..via.N.acetyl.L.citrulline.	mode_of_delivery	Vaginal	-0.000803364	0.000803364	0.000329482	740	730	0.0149937	0.0432508
PWY-7209..superpathway.of.pyrimidine.ribonucleosides.degradation	visit_age_mo	visit_age_mo	0.000293435	0.000293435	0.000120379	740	432	0.0150218	0.0432508
PWY-7229..superpathway.of.adenosine.nucleotides.de.novo.biosynthesis.I	visit_age_mo	visit_age_mo	-0.000443279	0.000443279	0.000181843	740	735	0.0150167	0.0432508
PWY-6708..ubiquinol.8.biosynthesis..early.decarboxylation.	probiotics_firstyr	probiotics_firstyr	-0.000250739	0.000250739	0.00010333	740	237	0.0154806	0.044497
PWY-1042..glycolysis.IV	mode_of_delivery	Vaginal	-0.000806538	0.000806538	0.000332785	740	737	0.0156081	0.0447884
PWY-621..sucrose.degradation.III..sucrose.invertase.	probiotics_firstyr	probiotics_firstyr	0.000552651	0.000552651	0.000228342	740	731	0.0157503	0.0451211
UBISYN.PWY-.superpathway.of.ubiquinol.8.biosynthesis..early.decarboxylation.	probiotics_firstyr	probiotics_firstyr	-0.000259622	0.000259622	0.000107442	740	237	0.0159173	0.0455234
COBALSYN.PWY-.superpathway.of.adenosylcobalamin.salvage.from.cobinamide.I	mode_of_delivery	Vaginal	-0.000898723	0.000898723	0.00037267	740	697	0.0161278	0.0460488
DENITRIFICATION.PWY-.nitrate.reduction.I..denitrification.	visit_age_mo	visit_age_mo	-0.000133973	0.000133973	5.55785e-05	740	99	0.0161747	0.046106
SER.GLYSYN.PWY-.superpathway.of.L.serine.and.glycine.biosynthesis.I	visit_age_mo	visit_age_mo	0.00031764	0.00031764	0.000132232	740	735	0.0165468	0.0470883
PWY-5695..inosine.5..phosphate.degradation	visit_age_mo	visit_age_mo	-0.00036717	0.00036717	0.000153154	740	738	0.0167606	0.047618
HISDEG.PWY-.L.histidine.degradation.I	visit_age_mo	visit_age_mo	0.000575553	0.000575553	0.000240699	740	665	0.0170453	0.0483467
PWY-7237..myo...chiro..and.scyllo.inositol.degradation	mode_of_delivery	Vaginal	-0.00175409	0.00175409	0.000735581	740	500	0.0173491	0.0491272
PWY-7874..L.threonate.degradation	symptoms	AP	0.000453784	0.000453784	0.000190625	740	330	0.0175425	0.0495931
PWY-7340..9.cis..11.trans.octadecadienoyl.CoA.degradation..isomerase.dependent..yeast.	visit_age_mo	visit_age_mo	0.00020336	0.00020336	8.56777e-05	740	330	0.0178743	0.0504479
PWY-5676..acetyl.CoA.fermentation.to.butanoate.II	symptoms	AP	0.000895872	0.000895872	0.000378373	740	575	0.0181573	0.0511624	PWY-5676	SCFA
PWY-6628..superpathway.of.L.phenylalanine.biosynthesis	visit_age_mo	visit_age_mo	-0.000417367	0.000417367	0.000176441	740	727	0.0182655	0.0513831
PWY-7228..superpathway.of.guanosine.nucleotides.de.novo.biosynthesis.I	visit_age_mo	visit_age_mo	-0.000474328	0.000474328	0.000201071	740	733	0.0185845	0.0521589
PWY-7356..thiamine.diphosphate.salvage.IV..yeast.	symptoms	AP	-0.00114204	0.00114204	0.00048419	740	650	0.0186021	0.0521589
LPSSYN.PWY-.superpathway.of.lipopolysaccharide.biosynthesis	probiotics_firstyr	probiotics_firstyr	-0.000227098	0.000227098	9.63673e-05	740	110	0.0187052	0.0523623
PWY-5971..palmitate.biosynthesis..type.II.fatty.acid.synthase.	mode_of_delivery	Vaginal	-0.00127893	0.00127893	0.00054361	740	620	0.0189026	0.0528288
PWY-241..C4.photosynthetic.carbon.assimilation.cycle..NADP.ME.type	symptoms	AP	-0.000860036	0.000860036	0.000366848	740	699	0.0193235	0.0539173
PWY-7384..anaerobic.energy.metabolism..invertebrates..mitochondrial.	mode_of_delivery	Vaginal	-0.000169731	0.000169731	7.24341e-05	740	60	0.0193826	0.0539943	PWY-7384	SCFA
PWY-.42..2.methylcitrate.cycle.I	probiotics_firstyr	probiotics_firstyr	-0.000417692	0.000417692	0.000178347	740	478	0.0194455	0.0540819
PWY-6545..pyrimidine.deoxyribonucleotides.de.novo.biosynthesis.III	visit_age_mo	visit_age_mo	0.000368741	0.000368741	0.000157709	740	570	0.0196485	0.0545579
PWY-5345..superpathway.of.L.methionine.biosynthesis..by.sulfhydrylation.	mode_of_delivery	Vaginal	-0.00087169	0.00087169	0.000373948	740	685	0.0200203	0.0555006
PWY-3841..folate.transformations.II..plants.	visit_age_mo	visit_age_mo	0.000312093	0.000312093	0.000134125	740	738	0.0202419	0.0560004
PWY-O.4107..NAD.salvage.pathway.V..PNC.V.cycle.	mode_of_delivery	Vaginal	0.000949736	0.000949736	0.000408235	740	659	0.0202659	0.0560004
GLUCONEO.PWY-.gluconeogenesis.I	mode_of_delivery	Vaginal	-0.000700193	0.000700193	0.000301158	740	730	0.0203431	0.0561235
PWY-5692..allantoin.degradation.to.glyoxylate.II	mode_of_delivery	Vaginal	-0.000208083	0.000208083	8.96063e-05	740	106	0.0204953	0.056362
URDEGR.PWY-.superpathway.of.allantoin.degradation.in.plants	mode_of_delivery	Vaginal	-0.000208083	0.000208083	8.96063e-05	740	106	0.0204953	0.056362
PWY-6.389..phytol.degradation	probiotics_firstyr	probiotics_firstyr	0.000392331	0.000392331	0.00016923	740	446	0.0207051	0.0568479
KDO.NAGLIPASYN.PWY-.superpathway.of..Kdo.2.lipid.A.biosynthesis	symptoms	AP	0.000688789	0.000688789	0.000297383	740	464	0.0208232	0.0570808
CARNMET.PWY-.L.carnitine.degradation.I	mode_of_delivery	Vaginal	-0.00050329	0.00050329	0.000217695	740	431	0.0210588	0.0576347
PWY-6386..UDP.N.acetylmuramoyl.pentapeptide.biosynthesis.II..lysine.containing.	visit_age_mo	visit_age_mo	0.000323973	0.000323973	0.000140236	740	738	0.0211535	0.0578017
PWY-6609..adenine.and.adenosine.salvage.III	mode_of_delivery	Vaginal	-0.000802064	0.000802064	0.000347824	740	738	0.0213908	0.0583571
PWY-LZ.257..superpathway.of.fermentation..Chlamydomonas.reinhardtii.	symptoms	AP	-0.00105324	0.00105324	0.00045742	740	641	0.0215817	0.0587845
ANAEROFRUCAT.PWY-.homolactic.fermentation	mode_of_delivery	Vaginal	-0.000599176	0.000599176	0.000260448	740	735	0.0216957	0.0589081	AEROFRUCAT-PWY	SCFA
POLYISOPRENSYN.PWY-.polyisoprenoid.biosynthesis..E..coli.	probiotics_firstyr	probiotics_firstyr	-0.000405439	0.000405439	0.000176216	740	717	0.021682	0.0589081
PWY-622..starch.biosynthesis	probiotics_firstyr	probiotics_firstyr	0.0007339	0.0007339	0.00031925	740	466	0.0217947	0.0590833
PWY-7269..mitochondrial.NADPH.production..yeast.	symptoms	AP	-0.000741008	0.000741008	0.000323131	740	338	0.0221173	0.0597689
PWY-8190..L.glutamate.degradation.XI..reductive.Stickland.reaction.	mode_of_delivery	Vaginal	-0.000162689	0.000162689	7.09264e-05	740	67	0.0220845	0.0597689	PWY-8190	SCFA
PWY-8187..L.arginine.degradation.XIII..reductive.Stickland.reaction.	symptoms	AP	0.00101286	0.00101286	0.00044266	740	727	0.0224139	0.0604753
PWY-7723..bacterial.bioluminescence	mode_of_delivery	Vaginal	-0.000220248	0.000220248	9.65288e-05	740	97	0.0227935	0.0613438
PWY-I9..L.cysteine.biosynthesis.VI..from.L.methionine.	visit_age_mo	visit_age_mo	-0.000462472	0.000462472	0.00020271	740	734	0.0228073	0.0613438
DAPLYSINESYN.PWY-.L.lysine.biosynthesis.I	mode_of_delivery	Vaginal	-0.000977297	0.000977297	0.000429051	740	725	0.0230242	0.0618302
POLYAMSYN.PWY-.superpathway.of.polyamine.biosynthesis.I	probiotics_firstyr	probiotics_firstyr	-0.000510216	0.000510216	0.000224825	740	664	0.0235332	0.0630984
PWY-7211..superpathway.of.pyrimidine.deoxyribonucleotides.de.novo.biosynthesis	visit_age_mo	visit_age_mo	0.000413946	0.000413946	0.000182596	740	499	0.0236796	0.0633918
CALVIN.PWY-.Calvin.Benson.Bassham.cycle	probiotics_firstyr	probiotics_firstyr	-0.000423824	0.000423824	0.000187065	740	733	0.0237628	0.0634167
PWY-5415..catechol.degradation.I..meta.cleavage.pathway.	probiotics_firstyr	probiotics_firstyr	0.000151401	0.000151401	6.68229e-05	740	190	0.0237599	0.0634167
PWY-6731..starch.degradation.III	mode_of_delivery	Vaginal	0.000954646	0.000954646	0.000423259	740	631	0.0243976	0.0650096
COMPLETE.ARO.PWY-.superpathway.of.aromatic.amino.acid.biosynthesis	mode_of_delivery	Vaginal	-0.000617891	0.000617891	0.000274451	740	738	0.0246569	0.0655988
PWY-.1061..superpathway.of.L.alanine.biosynthesis	mode_of_delivery	Vaginal	-0.00108293	0.00108293	0.000481805	740	715	0.0248943	0.0661278
PWY-6920..6.gingerol.analog.biosynthesis..engineered.	probiotics_firstyr	probiotics_firstyr	-0.00010725	0.00010725	4.78288e-05	740	78	0.0252344	0.0669276
PWY-6749..CMP.legionaminate.biosynthesis.I	visit_age_mo	visit_age_mo	0.000283522	0.000283522	0.000126508	740	251	0.0253146	0.0670369
PWY-6292..superpathway.of.L.cysteine.biosynthesis..mammalian.	visit_age_mo	visit_age_mo	0.000318951	0.000318951	0.000142541	740	505	0.0255457	0.0675445
PWY-3801..sucrose.degradation.II..sucrose.synthase.	visit_age_mo	visit_age_mo	-0.000213919	0.000213919	9.64057e-05	740	84	0.0267953	0.0707396
PWY-FS.7..phosphatidylglycerol.biosynthesis.I..plastidic.	probiotics_firstyr	probiotics_firstyr	-0.000455928	0.000455928	0.000205784	740	729	0.0270267	0.071241
PWY-FS.8..phosphatidylglycerol.biosynthesis.II..non.plastidic.	probiotics_firstyr	probiotics_firstyr	-0.000455716	0.000455716	0.000205754	740	729	0.0270761	0.0712615
PWY-.461..L.lysine.degradation.I	symptoms	AP	0.000605059	0.000605059	0.000273498	740	404	0.0272529	0.071617
COBALSYN.PWY-.superpathway.of.adenosylcobalamin.salvage.from.cobinamide.I	probiotics_firstyr	probiotics_firstyr	-0.000462592	0.000462592	0.000209207	740	697	0.0273311	0.0717127
KDO.NAGLIPASYN.PWY-.superpathway.of..Kdo.2.lipid.A.biosynthesis	probiotics_firstyr	probiotics_firstyr	-0.000320265	0.000320265	0.000145325	740	464	0.0278483	0.0729584
PWY-6285..superpathway.of.fatty.acids.biosynthesis..E..coli.	probiotics_firstyr	probiotics_firstyr	-0.000585643	0.000585643	0.000266088	740	570	0.0280508	0.0733576
PWY-7977..L.methionine.biosynthesis.IV	visit_age_mo	visit_age_mo	0.000413071	0.000413071	0.000187722	740	728	0.0280862	0.0733576
PWY-5845..superpathway.of.menaquinol.9.biosynthesis	mode_of_delivery	Vaginal	-0.000871715	0.000871715	0.000397326	740	622	0.0285512	0.0744588
GALACTARDEG.PWY-.D.galactarate.degradation.I	probiotics_firstyr	probiotics_firstyr	-0.000550373	0.000550373	0.00025189	740	683	0.0292059	0.0759354
GLUCARGALACTSUPER.PWY-.superpathway.of.D.glucarate.and.D.galactarate.degradation	probiotics_firstyr	probiotics_firstyr	-0.000550373	0.000550373	0.00025189	740	683	0.0292059	0.0759354
PWY-6992..1.5.anhydrofructose.degradation	symptoms	AP	-0.000648811	0.000648811	0.000297061	740	259	0.0292703	0.0759876
PWY-6703..preQ0.biosynthesis	mode_of_delivery	Vaginal	0.000806678	0.000806678	0.000369534	740	737	0.0293543	0.0760907
PWY-6328..L.lysine.degradation.X	mode_of_delivery	Vaginal	-0.000254311	0.000254311	0.000116546	740	92	0.0294203	0.0761466
PWY-7323..superpathway.of.GDP.mannose.derived.O.antigen.building.blocks.biosynthesis	probiotics_firstyr	probiotics_firstyr	-0.00046104	0.00046104	0.000212033	740	638	0.0299949	0.077517
PWY-5971..palmitate.biosynthesis..type.II.fatty.acid.synthase.	symptoms	AP	0.00135552	0.00135552	0.000624476	740	620	0.030277	0.0780833
PWY-6531..mannitol.cycle	mode_of_delivery	Vaginal	-0.000839488	0.000839488	0.000386874	740	621	0.030332	0.0780833
PWY-7805...aminomethyl.phosphonate.degradation	mode_of_delivery	Vaginal	-0.000355344	0.000355344	0.000163777	740	134	0.0303506	0.0780833
CARNMET.PWY-.L.carnitine.degradation.I	symptoms	AP	0.000542403	0.000542403	0.000250079	740	431	0.0304081	0.0781142
PWY-7345..superpathway.of.anaerobic.sucrose.degradation	symptoms	AP	-0.000911562	0.000911562	0.000420689	740	714	0.0305684	0.0784086
PWY-6270..isoprene.biosynthesis.I	mode_of_delivery	Vaginal	0.000590643	0.000590643	0.00027278	740	731	0.0306882	0.0784813
PWY-7385..1.3.propanediol.biosynthesis..engineered.	probiotics_firstyr	probiotics_firstyr	-0.000343072	0.000343072	0.000158421	740	365	0.0306646	0.0784813
PWY-.162..superpathway.of.pyrimidine.ribonucleotides.de.novo.biosynthesis	symptoms	AP	-0.000756441	0.000756441	0.000351012	740	733	0.0314839	0.0803964
PWY-7316..dTDP.N.acetylviosamine.biosynthesis	symptoms	AP	-0.000769208	0.000769208	0.000357404	740	117	0.0317057	0.0808426
PWY-7396..butanol.and.isobutanol.biosynthesis..engineered.	visit_age_mo	visit_age_mo	-0.000137676	0.000137676	6.41468e-05	740	79	0.0321787	0.0819269
PWY-7688..dTDP..alpha..D.ravidosamine.and.dTDP.4.acetyl..alpha..D.ravidosamine.biosynthesis	symptoms	AP	0.000488856	0.000488856	0.000227987	740	91	0.0323423	0.0822212
PWY-.1221..putrescine.degradation.II	symptoms	AP	-0.000303844	0.000303844	0.000141997	740	114	0.0326999	0.0828849
PWY-.781..aspartate.superpathway	mode_of_delivery	Vaginal	-0.000900666	0.000900666	0.000420799	740	656	0.0326534	0.0828849
PWY-5384..sucrose.degradation.IV..sucrose.phosphorylase.	mode_of_delivery	Vaginal	-0.000918752	0.000918752	0.00042994	740	738	0.0329329	0.0833524
PWY-5484..glycolysis.II..from.fructose.6.phosphate.	visit_age_mo	visit_age_mo	-0.00028456	0.00028456	0.000134143	740	735	0.0342288	0.0865045
ASPASN.PWY-.superpathway.of.L.aspartate.and.L.asparagine.biosynthesis	probiotics_firstyr	probiotics_firstyr	-0.000363552	0.000363552	0.000171837	740	737	0.0347075	0.0875853
ARG.POLYAMINE.SYN..superpathway.of.arginine.and.polyamine.biosynthesis	probiotics_firstyr	probiotics_firstyr	-0.00050475	0.00050475	0.000238926	740	662	0.0349733	0.0881265
PWY-6895..superpathway.of.thiamine.diphosphate.biosynthesis.II	mode_of_delivery	Vaginal	-0.000880796	0.000880796	0.000417649	740	649	0.0352878	0.0887885
PWY-5910..superpathway.of.geranylgeranyldiphosphate.biosynthesis.I..via.mevalonate.	probiotics_firstyr	probiotics_firstyr	0.000216068	0.000216068	0.000102792	740	311	0.0358948	0.0901838
FUC.RHAMCAT.PWY-.superpathway.of.fucose.and.rhamnose.degradation	mode_of_delivery	Vaginal	-0.000801772	0.000801772	0.000381689	740	655	0.0360168	0.090358
PWY-.42..2.methylcitrate.cycle.I	symptoms	AP	0.000765045	0.000765045	0.000364957	740	478	0.0364003	0.0911868
PWY-6387..UDP.N.acetylmuramoyl.pentapeptide.biosynthesis.I..meso.diaminopimelate.containing.	visit_age_mo	visit_age_mo	0.000287253	0.000287253	0.000137161	740	738	0.0365768	0.0914953
PWY-5941..glycogen.degradation.II	mode_of_delivery	Vaginal	-0.000956279	0.000956279	0.000457978	740	737	0.0371375	0.0927627
PWY-.42..2.methylcitrate.cycle.I	mode_of_delivery	Vaginal	-0.000662803	0.000662803	0.000317697	740	478	0.0372982	0.0930286
CATECHOL.ORTHO.CLEAVAGE.PWY-.catechol.degradation.to..beta..ketoadipate	probiotics_firstyr	probiotics_firstyr	0.000250587	0.000250587	0.000120884	740	200	0.038524	0.0959464
P105.PWY-.TCA.cycle.IV..2.oxoglutarate.decarboxylase.	probiotics_firstyr	probiotics_firstyr	-0.000479512	0.000479512	0.000231994	740	552	0.039092	0.0970795
PWY-7357..thiamine.phosphate.formation.from.pyrithiamine.and.oxythiamine..yeast.	mode_of_delivery	Vaginal	-0.000609551	0.000609551	0.000294892	740	737	0.0390807	0.0970795
PWY-7196..superpathway.of.pyrimidine.ribonucleosides.salvage	mode_of_delivery	Vaginal	-0.000286059	0.000286059	0.000138689	740	111	0.0395016	0.0979549
COMPLETE.ARO.PWY-.superpathway.of.aromatic.amino.acid.biosynthesis	visit_age_mo	visit_age_mo	0.000262133	0.000262133	0.000127224	740	738	0.039712	0.0983344
PWY-6901..superpathway.of.glucose.and.xylose.degradation	mode_of_delivery	Vaginal	-0.00059382	0.00059382	0.000288385	740	728	0.0398345	0.0984956
PWY-5005..biotin.biosynthesis.II	symptoms	AP	-0.000830504	0.000830504	0.000403666	740	503	0.0399996	0.0987615
PWY-7356..thiamine.diphosphate.salvage.IV..yeast.	probiotics_firstyr	probiotics_firstyr	0.000486623	0.000486623	0.000236613	740	650	0.0400755	0.0988068
P42.PWY-.incomplete.reductive.TCA.cycle	symptoms	AP	-0.00071223	0.00071223	0.000346816	740	595	0.0403654	0.0993788
DARABCATK12.PWY-.D.arabinose.degradation.I	mode_of_delivery	Vaginal	-0.000460673	0.000460673	0.000224609	740	456	0.0406207	0.099837
PWY-7208..superpathway.of.pyrimidine.nucleobases.salvage	symptoms	AP	-0.000914628	0.000914628	0.000446047	740	734	0.0406679	0.099837
GALACT.GLUCUROCAT.PWY-.superpathway.of.hexuronide.and.hexuronate.degradation	symptoms	AP	0.000756863	0.000756863	0.000370082	740	498	0.0411985	0.100995
LIPA.CORESYN.PWY-.lipid.A.core.biosynthesis..E..coli.K.12.	probiotics_firstyr	probiotics_firstyr	-0.000154316	0.000154316	7.54779e-05	740	126	0.0412578	0.100996
PWY-5130..2.oxobutanoate.degradation.I	mode_of_delivery	Vaginal	-0.000663044	0.000663044	0.000326012	740	495	0.0423299	0.103326
PWY-7383..anaerobic.energy.metabolism..invertebrates..cytosol.	mode_of_delivery	Vaginal	-0.000634214	0.000634214	0.000311793	740	404	0.0423011	0.103326
BRANCHED.CHAIN.AA.SYN.PWY-.superpathway.of.branched.chain.amino.acid.biosynthesis	visit_age_mo	visit_age_mo	-0.000315484	0.000315484	0.00015541	740	739	0.0427158	0.10412
GOLPDLCAT.PWY-.superpathway.of.glycerol.degradation.to.1.3.propanediol	probiotics_firstyr	probiotics_firstyr	0.000373837	0.000373837	0.000184438	740	548	0.043033	0.104744
PWY-5156..superpathway.of.fatty.acid.biosynthesis.II..plant.	symptoms	AP	0.00025239	0.00025239	0.000124682	740	50	0.0433036	0.105146
PWY-5677..succinate.fermentation.to.butanoate	symptoms	AP	0.000269542	0.000269542	0.000133166	740	159	0.0433207	0.105146	PWY-5677	SCFA
KDO.NAGLIPASYN.PWY-.superpathway.of..Kdo.2.lipid.A.biosynthesis	mode_of_delivery	Vaginal	-0.000522163	0.000522163	0.000258874	740	464	0.044053	0.106772
HCAMHPDEG.PWY-.3.phenylpropanoate.and.3..3.hydroxyphenyl.propanoate.degradation.to.2.hydroxypentadienoate	symptoms	AP	-0.00075625	0.00075625	0.000375226	740	393	0.0442208	0.106877	HCAMHPDEG-PWY	Propiote
PWY-6690..cinnamate.and.3.hydroxycinnamate.degradation.to.2.hydroxypentadienoate	symptoms	AP	-0.00075625	0.00075625	0.000375226	740	393	0.0442208	0.106877
PWY-7323..superpathway.of.GDP.mannose.derived.O.antigen.building.blocks.biosynthesis	symptoms	AP	0.000873014	0.000873014	0.000433891	740	638	0.0445781	0.107589
DENITRIFICATION.PWY-.nitrate.reduction.I..denitrification.	mode_of_delivery	Vaginal	-0.000240893	0.000240893	0.000119895	740	99	0.0448814	0.108169
PWY-5103..L.isoleucine.biosynthesis.III	mode_of_delivery	Vaginal	-0.000674367	0.000674367	0.000337891	740	739	0.0463232	0.111488
PANTO.PWY-.phosphopantothenate.biosynthesis.I	probiotics_firstyr	probiotics_firstyr	-0.000376599	0.000376599	0.000188908	740	737	0.0465702	0.111925
FASYN.INITIAL.PWY-.superpathway.of.fatty.acid.biosynthesis.initiation..E..coli.	symptoms	AP	-0.000745402	0.000745402	0.000374303	740	364	0.0468026	0.112013
PWY-6807..xyloglucan.degradation.II..exoglucanase.	symptoms	AP	-0.000370359	0.000370359	0.000185918	740	48	0.0467342	0.112013
PWY-.862...5Z..dodecenoate.biosynthesis.I	mode_of_delivery	Vaginal	-0.000726401	0.000726401	0.000364701	740	729	0.0467657	0.112013
PWY-7399..methylphosphonate.degradation.II	probiotics_firstyr	probiotics_firstyr	-4.70268e-05	4.70268e-05	2.36434e-05	740	64	0.0470712	0.112499
PWY-5121..superpathway.of.geranylgeranyl.diphosphate.biosynthesis.II..via.MEP.	probiotics_firstyr	probiotics_firstyr	-0.000422401	0.000422401	0.000212519	740	700	0.0472272	0.11266
PWY-621..sucrose.degradation.III..sucrose.invertase.	visit_age_mo	visit_age_mo	-0.0003747	0.0003747	0.000188556	740	731	0.0472701	0.11266
PWY-6.399..gluconeogenesis.III	mode_of_delivery	Vaginal	-0.000638971	0.000638971	0.000322288	740	388	0.0477832	0.113725
PHOSLIPSYN.PWY-.superpathway.of.phospholipid.biosynthesis.I..bacteria.	mode_of_delivery	Vaginal	-0.000789537	0.000789537	0.000399876	740	719	0.048704	0.115346
PWY-5667..CDP.diacylglycerol.biosynthesis.I	probiotics_firstyr	probiotics_firstyr	-0.000423238	0.000423238	0.000214385	740	737	0.0487329	0.115346
PWY-7664..oleate.biosynthesis.IV..anaerobic.	mode_of_delivery	Vaginal	-0.000739512	0.000739512	0.00037456	740	726	0.0487161	0.115346
PWY-.1319..CDP.diacylglycerol.biosynthesis.II	probiotics_firstyr	probiotics_firstyr	-0.000423391	0.000423391	0.000214389	740	737	0.0486562	0.115346
PWY-7942..5.oxo.L.proline.metabolism	symptoms	AP	-0.000772973	0.000772973	0.000392293	740	572	0.0491677	0.116214
PWY-7294..D.xylose.degradation.IV	visit_age_mo	visit_age_mo	9.40253e-05	9.40253e-05	4.7911e-05	740	50	0.0500812	0.118048
PWY-.1277..3.phenylpropanoate.and.3..3.hydroxyphenyl.propanoate.degradation	symptoms	AP	-0.000792659	0.000792659	0.000403786	740	382	0.050015	0.118048
PWY-6969..TCA.cycle.V..2.oxoglutarate.synthase.	probiotics_firstyr	probiotics_firstyr	-0.000454687	0.000454687	0.000232022	740	655	0.0504122	0.118503
PWY-8178..pentose.phosphate.pathway..non.oxidative.branch..II	probiotics_firstyr	probiotics_firstyr	-0.000428165	0.000428165	0.000218465	740	736	0.0503876	0.118503
PWY-6562..norspermidine.biosynthesis	visit_age_mo	visit_age_mo	0.000103184	0.000103184	5.26878e-05	740	90	0.0505609	0.11869
LACTOSECAT.PWY-.lactose.and.galactose.degradation.I	probiotics_firstyr	probiotics_firstyr	0.00042271	0.00042271	0.00021668	740	638	0.0514546	0.120623
PWY-621..sucrose.degradation.III..sucrose.invertase.	symptoms	AP	-0.000909546	0.000909546	0.000467265	740	731	0.0519715	0.121669
PWY-.1298..superpathway.of.pyrimidine.deoxyribonucleosides.degradation	probiotics_firstyr	probiotics_firstyr	-0.000372491	0.000372491	0.000191445	740	727	0.0520741	0.121743
PWY-7204..pyridoxal.5..phosphate.salvage.II..plants.	probiotics_firstyr	probiotics_firstyr	-0.000381115	0.000381115	0.00019631	740	547	0.0525924	0.122787
RIBOSYN2.PWY-.flavin.biosynthesis.I..bacteria.and.plants.	visit_age_mo	visit_age_mo	0.000303808	0.000303808	0.000156881	740	730	0.0531839	0.123999
GLYCOLYSIS.E.D..superpathway.of.glycolysis.and.the.Entner.Doudoroff.pathway	mode_of_delivery	Vaginal	-0.000722556	0.000722556	0.000373298	740	702	0.0532998	0.124101
FASYN.ELONG.PWY-.fatty.acid.elongation....saturated	mode_of_delivery	Vaginal	-0.000721246	0.000721246	0.000375925	740	726	0.0554232	0.128848
PENTOSE.P.PWY-.pentose.phosphate.pathway	symptoms	AP	0.000676974	0.000676974	0.000352966	740	736	0.0555036	0.128848
PWY-5690..TCA.cycle.II..plants.and.fungi.	mode_of_delivery	Vaginal	-0.000320009	0.000320009	0.00016689	740	247	0.0555638	0.128848
PWY-5345..superpathway.of.L.methionine.biosynthesis..by.sulfhydrylation.	probiotics_firstyr	probiotics_firstyr	-0.000402178	0.000402178	0.000209924	740	685	0.0557747	0.129162
GLUTORN.PWY-.L.ornithine.biosynthesis.I	visit_age_mo	visit_age_mo	-0.000309843	0.000309843	0.000161849	740	738	0.0559582	0.129413
GALACTUROCAT.PWY-.D.galacturonate.degradation.I	mode_of_delivery	Vaginal	-0.00061962	0.00061962	0.000324829	740	673	0.0568416	0.131279
PWY-7254..TCA.cycle.VII..acetate.producers.	symptoms	AP	-0.000240142	0.000240142	0.000125934	740	113	0.0569248	0.131294	PWY-7254	Acetate
PWY-6531..mannitol.cycle	probiotics_firstyr	probiotics_firstyr	-0.000413977	0.000413977	0.00021718	740	621	0.0570215	0.131341
PWY-7254..TCA.cycle.VII..acetate.producers.	visit_age_mo	visit_age_mo	-9.67542e-05	9.67542e-05	5.08184e-05	740	113	0.0573109	0.13183	PWY-7254	Acetate
PWY-724..superpathway.of.L.lysine..L.threonine.and.L.methionine.biosynthesis.II	mode_of_delivery	Vaginal	-0.000539153	0.000539153	0.000283565	740	738	0.0576484	0.132429
ECASYN.PWY-.enterobacterial.common.antigen.biosynthesis	symptoms	AP	-0.000682236	0.000682236	0.00035908	740	514	0.0578299	0.132669
PWY-.1415..superpathway.of.heme.b.biosynthesis.from.uroporphyrinogen.III	probiotics_firstyr	probiotics_firstyr	-0.00041312	0.00041312	0.000218224	740	652	0.0587371	0.13457
PWY-6282..palmitoleate.biosynthesis.I..from..5Z..dodec.5.enoate.	mode_of_delivery	Vaginal	-0.000710556	0.000710556	0.000376225	740	726	0.0593329	0.135754
PWY-5695..inosine.5..phosphate.degradation	probiotics_firstyr	probiotics_firstyr	-0.000349932	0.000349932	0.00018547	740	738	0.0595897	0.13616
P125.PWY-.superpathway.of..R.R..butanediol.biosynthesis	symptoms	AP	-0.000467676	0.000467676	0.000248126	740	370	0.0598468	0.136384
PPGPPMET.PWY-.ppGpp.metabolism	symptoms	AP	-0.000840497	0.000840497	0.000445824	740	596	0.0597881	0.136384
PWY-5656..mannosylglycerate.biosynthesis.I	symptoms	AP	0.000772696	0.000772696	0.00041038	740	470	0.0601113	0.136805
PWY-1042..glycolysis.IV	probiotics_firstyr	probiotics_firstyr	-0.000351635	0.000351635	0.000186817	740	737	0.060197	0.136819
P122.PWY-.heterolactic.fermentation	probiotics_firstyr	probiotics_firstyr	0.000347902	0.000347902	0.000184984	740	583	0.0604068	0.137114	P122-PWY	SCFA
PWY-6293..superpathway.of.L.cysteine.biosynthesis..fungi.	symptoms	AP	-0.000484097	0.000484097	0.00025759	740	406	0.0605945	0.137358
PWY-8011..L.serine.biosynthesis.II	mode_of_delivery	Vaginal	-8.83863e-05	8.83863e-05	4.7079e-05	740	56	0.0608587	0.137775
PWY-5189..tetrapyrrole.biosynthesis.II..from.glycine.	probiotics_firstyr	probiotics_firstyr	-0.000383479	0.000383479	0.000204658	740	663	0.0613609	0.138729
PEPTIDOGLYCANSYN.PWY-.peptidoglycan.biosynthesis.I..meso.diaminopimelate.containing.	visit_age_mo	visit_age_mo	0.000256332	0.000256332	0.000137132	740	738	0.0619873	0.139961
P108.PWY-.pyruvate.fermentation.to.propanoate.I	symptoms	AP	-0.000654512	0.000654512	0.000350644	740	487	0.0623556	0.140607	P108-PWY	SCFA
CITRULBIO.PWY-.L.citrulline.biosynthesis	symptoms	AP	0.000900945	0.000900945	0.000484416	740	706	0.0633051	0.142374
PWY-6470..peptidoglycan.biosynthesis.V...beta..lactam.resistance.	probiotics_firstyr	probiotics_firstyr	-0.000285019	0.000285019	0.000153221	740	272	0.0632587	0.142374
PWY-5692..allantoin.degradation.to.glyoxylate.II	probiotics_firstyr	probiotics_firstyr	-9.31461e-05	9.31461e-05	5.03025e-05	740	106	0.0644672	0.14442
PWY-6606..guanosine.nucleotides.degradation.II	visit_age_mo	visit_age_mo	-0.000349664	0.000349664	0.00018873	740	706	0.0643232	0.14442
URDEGR.PWY-.superpathway.of.allantoin.degradation.in.plants	probiotics_firstyr	probiotics_firstyr	-9.31461e-05	9.31461e-05	5.03025e-05	740	106	0.0644672	0.14442
PWY-6595..superpathway.of.guanosine.nucleotides.degradation..plants.	probiotics_firstyr	probiotics_firstyr	-0.000290939	0.000290939	0.000157306	740	484	0.0647852	0.144755
THREOCAT.PWY-.superpathway.of.L.threonine.metabolism	symptoms	AP	-0.000558335	0.000558335	0.000301883	740	241	0.0647855	0.144755
PWY-1861..formaldehyde.assimilation.II..assimilatory.RuMP.Cycle.	visit_age_mo	visit_age_mo	-0.000377557	0.000377557	0.000204256	740	592	0.0649392	0.14491
PWY-7391..isoprene.biosynthesis.II..engineered.	symptoms	AP	-0.000285496	0.000285496	0.000154665	740	154	0.0653097	0.145547
PWY-6182..superpathway.of.salicylate.degradation	probiotics_firstyr	probiotics_firstyr	0.000197223	0.000197223	0.00010722	740	147	0.0662552	0.147463
THISYNARA.PWY-.superpathway.of.thiamine.diphosphate.biosynthesis.III..eukaryotes.	symptoms	AP	0.000816693	0.000816693	0.000444258	740	719	0.0664171	0.147632
PWY-1269..CMP.3.deoxy.D.manno.octulosonate.biosynthesis	probiotics_firstyr	probiotics_firstyr	-0.000409718	0.000409718	0.000223137	740	719	0.0667363	0.148149
PWY-6147..6.hydroxymethyl.dihydropterin.diphosphate.biosynthesis.I	visit_age_mo	visit_age_mo	-0.000349628	0.000349628	0.000191088	740	734	0.0677038	0.150103
PWY-5097..L.lysine.biosynthesis.VI	visit_age_mo	visit_age_mo	0.000257484	0.000257484	0.000141176	740	738	0.0685801	0.15185
PWY-7221..guanosine.ribonucleotides.de.novo.biosynthesis	visit_age_mo	visit_age_mo	0.000292891	0.000292891	0.000160834	740	739	0.0690022	0.152587
PWY-5100..pyruvate.fermentation.to.acetate.and.lactate.II	probiotics_firstyr	probiotics_firstyr	0.000456531	0.000456531	0.000250858	740	736	0.069184	0.152725	PWY-5100	SCFA
PWY-6961..L.ascorbate.degradation.II..bacterial..aerobic.	symptoms	AP	0.000900861	0.000900861	0.000495154	740	617	0.0692642	0.152725
RUMP.PWY-.formaldehyde.oxidation.I	symptoms	AP	0.00045561	0.00045561	0.000250485	740	319	0.0693316	0.152725
ARGININE.SYN4.PWY-.L.ornithine.biosynthesis.II	visit_age_mo	visit_age_mo	0.000383292	0.000383292	0.000211069	740	702	0.0697841	0.153525
ILEUSYN.PWY-.L.isoleucine.biosynthesis.I..from.threonine.	mode_of_delivery	Vaginal	-0.000618553	0.000618553	0.000340872	740	739	0.0699905	0.153782
SALVADEHYPOX.PWY-.adenosine.nucleotides.degradation.II	symptoms	AP	0.00125849	0.00125849	0.0006939	740	616	0.0701397	0.153913
CALVIN.PWY-.Calvin.Benson.Bassham.cycle	visit_age_mo	visit_age_mo	-0.000279289	0.000279289	0.000154471	740	733	0.0710091	0.155621
PWY-6215..4.chlorobenzoate.degradation	mode_of_delivery	Vaginal	-8.25519e-05	8.25519e-05	4.59023e-05	740	46	0.0725198	0.15873
PWY-5994..palmitate.biosynthesis..type.I.fatty.acid.synthase.	probiotics_firstyr	probiotics_firstyr	0.000285264	0.000285264	0.000158908	740	216	0.0730399	0.159664
PPGPPMET.PWY-.ppGpp.metabolism	probiotics_firstyr	probiotics_firstyr	0.000390649	0.000390649	0.000217865	740	596	0.0733713	0.160185
PWY-7391..isoprene.biosynthesis.II..engineered.	probiotics_firstyr	probiotics_firstyr	0.000135308	0.000135308	7.55817e-05	740	154	0.0738289	0.160979
PWY-7197..pyrimidine.deoxyribonucleotide.phosphorylation	probiotics_firstyr	probiotics_firstyr	0.000379158	0.000379158	0.000211932	740	731	0.0740176	0.161186
PWY-6606..guanosine.nucleotides.degradation.II	probiotics_firstyr	probiotics_firstyr	-0.000407604	0.000407604	0.000228553	740	706	0.074932	0.16297
UBISYN.PWY-.superpathway.of.ubiquinol.8.biosynthesis..early.decarboxylation.	symptoms	AP	0.000391825	0.000391825	0.000219861	740	237	0.0751382	0.163212
GLYCOLYSIS.E.D..superpathway.of.glycolysis.and.the.Entner.Doudoroff.pathway	probiotics_firstyr	probiotics_firstyr	-0.00037207	0.00037207	0.000209559	740	702	0.0762313	0.165377
AEROBACTINSYN.PWY-.aerobactin.biosynthesis	visit_age_mo	visit_age_mo	-0.00018503	0.00018503	0.000104648	740	161	0.0774559	0.167398
PWY-7200..superpathway.of.pyrimidine.deoxyribonucleoside.salvage	symptoms	AP	-0.000370885	0.000370885	0.000209733	740	106	0.077415	0.167398
PWY-7446..sulfoquinovose.degradation.I	symptoms	AP	-0.000508829	0.000508829	0.000287626	740	274	0.077298	0.167398
P562.PWY-.myo.inositol.degradation.I	symptoms	AP	0.000452838	0.000452838	0.000257236	740	287	0.0787563	0.169568
PWY-5692..allantoin.degradation.to.glyoxylate.II	visit_age_mo	visit_age_mo	7.31396e-05	7.31396e-05	4.15378e-05	740	106	0.0786891	0.169568
URDEGR.PWY-.superpathway.of.allantoin.degradation.in.plants	visit_age_mo	visit_age_mo	7.31396e-05	7.31396e-05	4.15378e-05	740	106	0.0786891	0.169568
PWY-6708..ubiquinol.8.biosynthesis..early.decarboxylation.	symptoms	AP	0.000371947	0.000371947	0.000211447	740	237	0.0789843	0.169846
PWY-.1533..methylphosphonate.degradation.I	mode_of_delivery	Vaginal	-0.000291009	0.000291009	0.000165571	740	201	0.0792316	0.170164
NONOXIPENT.PWY-.pentose.phosphate.pathway..non.oxidative.branch..I	probiotics_firstyr	probiotics_firstyr	-0.000409963	0.000409963	0.000233815	740	737	0.0799566	0.171507
PWY-6353..purine.nucleotides.degradation.II..aerobic.	symptoms	AP	0.0010527	0.0010527	0.000600619	740	613	0.0800722	0.17154
PWY-6897..thiamine.diphosphate.salvage.II	visit_age_mo	visit_age_mo	0.000212748	0.000212748	0.000121461	740	736	0.080265	0.171739
PWY-7200..superpathway.of.pyrimidine.deoxyribonucleoside.salvage	mode_of_delivery	Vaginal	-0.000319529	0.000319529	0.000182574	740	106	0.0805128	0.172055
PWY-6527..stachyose.degradation	symptoms	AP	0.000743966	0.000743966	0.000425383	740	728	0.0807203	0.172284
PANTO.PWY-.phosphopantothenate.biosynthesis.I	mode_of_delivery	Vaginal	0.000588092	0.000588092	0.000336512	740	737	0.0809488	0.172557
PWY-6922..L.N.delta..acetylornithine.biosynthesis	mode_of_delivery	Vaginal	-0.000356734	0.000356734	0.000204519	740	302	0.0815329	0.173274
PWY-6992..1.5.anhydrofructose.degradation	probiotics_firstyr	probiotics_firstyr	0.000253205	0.000253205	0.000145168	740	259	0.0815377	0.173274
PWY-.461..L.lysine.degradation.I	probiotics_firstyr	probiotics_firstyr	-0.000233082	0.000233082	0.000133653	740	404	0.0815884	0.173274
PWY-561..superpathway.of.glyoxylate.cycle.and.fatty.acid.degradation	probiotics_firstyr	probiotics_firstyr	-0.000438617	0.000438617	0.000251868	740	584	0.0820221	0.173765
PWY-5747..2.methylcitrate.cycle.II	probiotics_firstyr	probiotics_firstyr	-0.000232499	0.000232499	0.000133472	740	431	0.0819378	0.173765
PWY-7396..butanol.and.isobutanol.biosynthesis..engineered.	symptoms	AP	-0.000276586	0.000276586	0.000158963	740	79	0.0822888	0.173975
REDCITCYC..TCA.cycle.VI..Helicobacter.	symptoms	AP	-0.000584768	0.000584768	0.000336125	740	411	0.0823239	0.173975
PWY-7197..pyrimidine.deoxyribonucleotide.phosphorylation	symptoms	AP	-0.000753836	0.000753836	0.000433684	740	731	0.082592	0.174327
PWY-6121..5.aminoimidazole.ribonucleotide.biosynthesis.I	mode_of_delivery	Vaginal	-0.000515355	0.000515355	0.000296816	740	738	0.0829332	0.174832
ANAGLYCOLYSIS.PWY-.glycolysis.III..from.glucose.	probiotics_firstyr	probiotics_firstyr	-0.000236515	0.000236515	0.000136469	740	738	0.0834976	0.175806
PWY-5667..CDP.diacylglycerol.biosynthesis.I	symptoms	AP	0.000759415	0.000759415	0.000438702	740	737	0.0838627	0.176358
PWY-6823..molybdopterin.biosynthesis	symptoms	AP	-0.000733044	0.000733044	0.000423969	740	728	0.0842283	0.17691
PWY-.1319..CDP.diacylglycerol.biosynthesis.II	symptoms	AP	0.000757797	0.000757797	0.000438711	740	737	0.0845291	0.177325
PWY-5392..reductive.TCA.cycle.II	visit_age_mo	visit_age_mo	4.39794e-05	4.39794e-05	2.54935e-05	740	48	0.0849261	0.17794
GLYCOLYSIS.TCA.GLYOX.BYPASS..superpathway.of.glycolysis..pyruvate.dehydrogenase..TCA..and.glyoxylate.bypass	probiotics_firstyr	probiotics_firstyr	-0.000343748	0.000343748	0.000199812	740	414	0.0857878	0.179308
PWY-5384..sucrose.degradation.IV..sucrose.phosphorylase.	probiotics_firstyr	probiotics_firstyr	0.000415307	0.000415307	0.000241356	740	738	0.0857223	0.179308
ARO.PWY-.chorismate.biosynthesis.I	mode_of_delivery	Vaginal	-0.000480794	0.000480794	0.000279683	740	739	0.0860231	0.179581
PWY-7388..octanoyl..acyl.carrier.protein..biosynthesis..mitochondria..yeast.	visit_age_mo	visit_age_mo	-0.000181958	0.000181958	0.000105904	740	177	0.086193	0.179717
PWY-6607..guanosine.nucleotides.degradation.I	probiotics_firstyr	probiotics_firstyr	-0.00030509	0.00030509	0.000177669	740	489	0.0863661	0.17986
PWY-7198..pyrimidine.deoxyribonucleotides.de.novo.biosynthesis.IV	visit_age_mo	visit_age_mo	0.000331693	0.000331693	0.000193504	740	673	0.0869237	0.180801
GLUCARDEG.PWY-.D.glucarate.degradation.I	probiotics_firstyr	probiotics_firstyr	-0.000358558	0.000358558	0.000209694	740	667	0.0877049	0.18203
PWY-7238..sucrose.biosynthesis.II	mode_of_delivery	Vaginal	-0.000859055	0.000859055	0.000502432	740	737	0.0877264	0.18203
PWY-5005..biotin.biosynthesis.II	visit_age_mo	visit_age_mo	0.000278416	0.000278416	0.000162892	740	503	0.0878349	0.182035
BIOTIN.BIOSYNTHESIS.PWY-.biotin.biosynthesis.I	probiotics_firstyr	probiotics_firstyr	-0.000363641	0.000363641	0.000213145	740	708	0.0884159	0.183018
GLUCUROCAT.PWY-.superpathway.of..beta..D.glucuronosides.degradation	mode_of_delivery	Vaginal	0.000608277	0.000608277	0.000356937	740	635	0.0887741	0.183185
PWY-5497..purine.nucleobases.degradation.II..anaerobic.	probiotics_firstyr	probiotics_firstyr	-0.000293633	0.000293633	0.000172392	740	538	0.0889362	0.183185
PWY-5838..superpathway.of.menaquinol.8.biosynthesis.I	mode_of_delivery	Vaginal	-0.00064092	0.00064092	0.000376056	740	663	0.0887436	0.183185
PWY-5973..cis.vaccenate.biosynthesis	visit_age_mo	visit_age_mo	-0.000258934	0.000258934	0.000152031	740	737	0.0889602	0.183185
PWY-.1221..putrescine.degradation.II	visit_age_mo	visit_age_mo	9.75701e-05	9.75701e-05	5.73002e-05	740	114	0.0890304	0.183185
PWY-5417..catechol.degradation.III..ortho.cleavage.pathway.	probiotics_firstyr	probiotics_firstyr	0.000229855	0.000229855	0.000135209	740	195	0.089555	0.183823
PWY-5431..aromatic.compounds.degradation.via..beta..ketoadipate	probiotics_firstyr	probiotics_firstyr	0.000229855	0.000229855	0.000135209	740	195	0.089555	0.183823
PWY-2942..L.lysine.biosynthesis.III	symptoms	AP	-0.00094007	0.00094007	0.000554062	740	688	0.0901789	0.184719
TCA.GLYOX.BYPASS..superpathway.of.glyoxylate.bypass.and.TCA	probiotics_firstyr	probiotics_firstyr	-0.000438832	0.000438832	0.000258663	740	579	0.0902065	0.184719
NONOXIPENT.PWY-.pentose.phosphate.pathway..non.oxidative.branch..I	symptoms	AP	0.000809644	0.000809644	0.000478464	740	737	0.0910367	0.185975
PWY-241..C4.photosynthetic.carbon.assimilation.cycle..NADP.ME.type	mode_of_delivery	Vaginal	0.000540509	0.000540509	0.000319344	740	699	0.090963	0.185975
FUC.RHAMCAT.PWY-.superpathway.of.fucose.and.rhamnose.degradation	probiotics_firstyr	probiotics_firstyr	-0.000362356	0.000362356	0.000214269	740	655	0.0912374	0.186163
P41.PWY-.pyruvate.fermentation.to.acetate.and..S..lactate.I	probiotics_firstyr	probiotics_firstyr	0.000436526	0.000436526	0.000258452	740	736	0.0916437	0.186549	P41-PWY	SCFA
PWY-6285..superpathway.of.fatty.acids.biosynthesis..E..coli.	symptoms	AP	0.000919958	0.000919958	0.000544505	740	570	0.091542	0.186549
PWY-5659..GDP.mannose.biosynthesis	symptoms	AP	0.00065058	0.00065058	0.000387108	740	733	0.0932625	0.189619
GLUCONEO.PWY-.gluconeogenesis.I	symptoms	AP	-0.000580081	0.000580081	0.000345957	740	730	0.0940174	0.190928
PWY-7761..NAD.salvage.pathway.II..PNC.IV.cycle.	mode_of_delivery	Vaginal	-0.000480493	0.000480493	0.000286755	740	713	0.0942376	0.191149
PWY-7199..pyrimidine.deoxyribonucleosides.salvage	mode_of_delivery	Vaginal	0.00059805	0.00059805	0.000358738	740	734	0.0959223	0.194336
PWY-7392..taxadiene.biosynthesis..engineered.	mode_of_delivery	Vaginal	0.000686963	0.000686963	0.000413827	740	582	0.0973365	0.196737
PWY-O.4107..NAD.salvage.pathway.V..PNC.V.cycle.	probiotics_firstyr	probiotics_firstyr	-0.000380477	0.000380477	0.000229172	740	659	0.097296	0.196737
PWY-6519..8.amino.7.oxononanoate.biosynthesis.I	probiotics_firstyr	probiotics_firstyr	-0.000365584	0.000365584	0.000220357	740	709	0.0975307	0.196897
PWY-7977..L.methionine.biosynthesis.IV	symptoms	AP	-0.000769659	0.000769659	0.000465199	740	728	0.0984582	0.198536
PWY-6549..L.glutamine.biosynthesis.III	symptoms	AP	-0.000526208	0.000526208	0.000320676	740	422	0.101239	0.203905
PWY-6113..superpathway.of.mycolate.biosynthesis	probiotics_firstyr	probiotics_firstyr	0.000182565	0.000182565	0.000111813	740	81	0.102946	0.207098
PWY-.1338..polymyxin.resistance	probiotics_firstyr	probiotics_firstyr	-0.000295589	0.000295589	0.000181522	740	580	0.10387	0.208713
ALLANTOINDEG.PWY-.superpathway.of.allantoin.degradation.in.yeast	probiotics_firstyr	probiotics_firstyr	9.55041e-05	9.55041e-05	5.87458e-05	740	112	0.104439	0.20961
PWY-5723..Rubisco.shunt	probiotics_firstyr	probiotics_firstyr	-0.000444252	0.000444252	0.000274047	740	655	0.10543	0.211352
UNMAPPED	mode_of_delivery	Vaginal	-0.0122701	0.0122701	0.00757995	740	740	0.105927	0.211855
PWY-621..sucrose.degradation.III..sucrose.invertase.	mode_of_delivery	Vaginal	-0.000658671	0.000658671	0.000406758	740	731	0.105807	0.211855
FERMENTATION.PWY-.mixed.acid.fermentation	probiotics_firstyr	probiotics_firstyr	-0.000406847	0.000406847	0.000252126	740	692	0.10703	0.21381	FERMENTATION-PWY	SCFA
PWY-3801..sucrose.degradation.II..sucrose.synthase.	mode_of_delivery	Vaginal	-0.000334452	0.000334452	0.000207968	740	84	0.108224	0.215944
GLUDEG.I.PWY-.GABA.shunt	probiotics_firstyr	probiotics_firstyr	-0.000267078	0.000267078	0.000167344	740	475	0.110923	0.22032
P108.PWY-.pyruvate.fermentation.to.propanoate.I	visit_age_mo	visit_age_mo	-0.000225739	0.000225739	0.000141496	740	487	0.111059	0.22032	P108-PWY	SCFA
PWY-5656..mannosylglycerate.biosynthesis.I	mode_of_delivery	Vaginal	0.000570351	0.000570351	0.000357238	740	470	0.110795	0.22032
PWY-6608..guanosine.nucleotides.degradation.III	probiotics_firstyr	probiotics_firstyr	-0.000415449	0.000415449	0.000260315	740	725	0.11093	0.22032
PWY-7807..glyphosate.degradation.III	mode_of_delivery	Vaginal	-0.000314478	0.000314478	0.00019707	740	200	0.11097	0.22032
ALLANTOINDEG.PWY-.superpathway.of.allantoin.degradation.in.yeast	symptoms	AP	-0.000191427	0.000191427	0.000120214	740	112	0.111727	0.220893
CARNMET.PWY-.L.carnitine.degradation.I	probiotics_firstyr	probiotics_firstyr	-0.000194675	0.000194675	0.000122208	740	431	0.111596	0.220893
GALACTARDEG.PWY-.D.galactarate.degradation.I	symptoms	AP	0.000820194	0.000820194	0.000515452	740	683	0.111991	0.220893
GLUCARGALACTSUPER.PWY-.superpathway.of.D.glucarate.and.D.galactarate.degradation	symptoms	AP	0.000820194	0.000820194	0.000515452	740	683	0.111991	0.220893
PWY-7268..cytosolic.NADPH.production..yeast.	probiotics_firstyr	probiotics_firstyr	-0.000186591	0.000186591	0.00011723	740	94	0.111888	0.220893
PWY-4361..S.methyl.5.thio..alpha..D.ribose.1.phosphate.degradation.I	probiotics_firstyr	probiotics_firstyr	-5.83338e-05	5.83338e-05	3.68514e-05	740	49	0.113864	0.224328
PWY-.41..allantoin.degradation.IV..anaerobic.	symptoms	AP	-0.000266272	0.000266272	0.000168669	740	274	0.114844	0.226
PWY-7208..superpathway.of.pyrimidine.nucleobases.salvage	probiotics_firstyr	probiotics_firstyr	0.00034353	0.00034353	0.000217974	740	734	0.115452	0.226937
FASYN.INITIAL.PWY-.superpathway.of.fatty.acid.biosynthesis.initiation..E..coli.	probiotics_firstyr	probiotics_firstyr	0.00028787	0.00028787	0.000182914	740	364	0.115964	0.227682
VALSYN.PWY-.L.valine.biosynthesis	probiotics_firstyr	probiotics_firstyr	-0.000290823	0.000290823	0.000184957	740	740	0.116292	0.228066
PWY-5838..superpathway.of.menaquinol.8.biosynthesis.I	probiotics_firstyr	probiotics_firstyr	-0.000331328	0.000331328	0.000211107	740	663	0.116968	0.228992
PWY-7663..gondoate.biosynthesis..anaerobic.	probiotics_firstyr	probiotics_firstyr	-0.000286032	0.000286032	0.000182279	740	738	0.117031	0.228992
PWY-7389..superpathway.of.anaerobic.energy.metabolism..invertebrates.	probiotics_firstyr	probiotics_firstyr	-5.46301e-05	5.46301e-05	3.485e-05	740	38	0.11741	0.229472	PWY-7389	Succite
X1CMET2.PWY-.folate.transformations.III..E..coli.	probiotics_firstyr	probiotics_firstyr	-0.000298767	0.000298767	0.000190911	740	727	0.118025	0.230279
PWY-5022..4.aminobutanoate.degradation.V	mode_of_delivery	Vaginal	-0.000374704	0.000374704	0.000239478	740	284	0.118092	0.230279	PWY-5022	SCFA
PWY-7400..L.arginine.biosynthesis.IV..archaebacteria.	visit_age_mo	visit_age_mo	-0.000267431	0.000267431	0.000171252	740	723	0.118807	0.231411
PWY-922..mevalonate.pathway.I..eukaryotes.and.bacteria.	symptoms	AP	-0.00032691	0.00032691	0.000209863	740	335	0.119728	0.232939
PYRIDNUCSAL.PWY-.NAD.salvage.pathway.I..PNC.VI.cycle.	probiotics_firstyr	probiotics_firstyr	-0.000287661	0.000287661	0.000184796	740	649	0.119986	0.233177
GLYOXYLATE.BYPASS..glyoxylate.cycle	probiotics_firstyr	probiotics_firstyr	-0.000346165	0.000346165	0.000223563	740	657	0.121956	0.236254
HSERMETANA.PWY-.L.methionine.biosynthesis.III	mode_of_delivery	Vaginal	0.000650893	0.000650893	0.000420208	740	731	0.121818	0.236254
PWY-8178..pentose.phosphate.pathway..non.oxidative.branch..II	symptoms	AP	0.00069217	0.00069217	0.000447053	740	736	0.121982	0.236254
ANAGLYCOLYSIS.PWY-.glycolysis.III..from.glucose.	mode_of_delivery	Vaginal	-0.00037602	0.00037602	0.0002431	740	738	0.122349	0.236697
PWY-7115..C4.photosynthetic.carbon.assimilation.cycle..NAD.ME.type	symptoms	AP	-0.000611622	0.000611622	0.000398171	740	707	0.124949	0.241456
PANTOSYN.PWY-.superpathway.of.coenzyme.A.biosynthesis.I..bacteria.	probiotics_firstyr	probiotics_firstyr	-0.000274795	0.000274795	0.000179149	740	735	0.125486	0.242221
PWY-3801..sucrose.degradation.II..sucrose.synthase.	symptoms	AP	-0.000365705	0.000365705	0.000238905	740	84	0.12626	0.243441
PWY-.845..superpathway.of.pyridoxal.5..phosphate.biosynthesis.and.salvage	visit_age_mo	visit_age_mo	-0.000282249	0.000282249	0.000184643	740	700	0.126789	0.244186
HISDEG.PWY-.L.histidine.degradation.I	symptoms	AP	-0.000906688	0.000906688	0.000596482	740	665	0.128926	0.248024

## Sheet: 0-2 months
feature	metadata	value	coef	absolute coef	stderr	N	N.not.0	pval	qval	Pathway.ID	SCFA-association
PWY-7200..superpathway.of.pyrimidine.deoxyribonucleoside.salvage	visit_age_mo	visit_age_mo	-0.0013362	0.0013362	0.000190863	293	98	1.79378e-11	2.99203e-08
P23.PWY-.reductive.TCA.cycle.I	visit_age_mo	visit_age_mo	-0.000721372	0.000721372	0.000116936	293	82	2.32339e-09	1.93771e-06
PWY-8011..L.serine.biosynthesis.II	visit_age_mo	visit_age_mo	-0.000308036	0.000308036	5.06797e-05	293	54	3.84812e-09	2.13955e-06
PWY-5030..L.histidine.degradation.III	mode_of_delivery	Vaginal	0.00449245	0.00449245	0.000766724	293	153	1.26875e-08	5.29069e-06
PWY-5981..CDP.diacylglycerol.biosynthesis.III	mode_of_delivery	Vaginal	-0.00341006	0.00341006	0.00059169	293	281	2.12014e-08	7.07279e-06
PWY-7456...beta...1.4..mannan.degradation	mode_of_delivery	Vaginal	0.0030284	0.0030284	0.000538419	293	98	4.39989e-08	1.22317e-05
PWY-6823..molybdopterin.biosynthesis	mode_of_delivery	Vaginal	-0.00370825	0.00370825	0.000699766	293	288	2.31551e-07	5.51753e-05
PWY-1622..formaldehyde.assimilation.I..serine.pathway.	visit_age_mo	visit_age_mo	-0.000319467	0.000319467	6.0743e-05	293	29	2.82456e-07	5.88922e-05
PWY-.1297..superpathway.of.purine.deoxyribonucleosides.degradation	mode_of_delivery	Vaginal	-0.00327072	0.00327072	0.000637694	293	291	5.35886e-07	9.93175e-05
UDPNAGSYN.PWY-.UDP.N.acetyl.D.glucosamine.biosynthesis.I	mode_of_delivery	Vaginal	-0.00377129	0.00377129	0.00076111	293	293	1.23577e-06	0.000206126
GLUDEG.I.PWY-.GABA.shunt	mode_of_delivery	Vaginal	0.00254765	0.00254765	0.000518257	293	154	1.48703e-06	0.000215023
PWY-702..L.methionine.biosynthesis.II	mode_of_delivery	Vaginal	-0.00387313	0.00387313	0.000789242	293	292	1.54693e-06	0.000215023
P125.PWY-.superpathway.of..R.R..butanediol.biosynthesis	visit_age_mo	visit_age_mo	-0.00096028	0.00096028	0.000205378	293	185	4.50831e-06	0.00050272
PWY-5188..tetrapyrrole.biosynthesis.I..from.glutamate.	mode_of_delivery	Vaginal	-0.00348469	0.00348469	0.000745378	293	286	4.52086e-06	0.00050272
PWY-7254..TCA.cycle.VII..acetate.producers.	visit_age_mo	visit_age_mo	-0.000427768	0.000427768	9.14143e-05	293	62	4.43208e-06	0.00050272	PWY-7254	Acetate
PWY-7237..myo...chiro..and.scyllo.inositol.degradation	visit_age_mo	visit_age_mo	0.00253429	0.00253429	0.000547844	293	164	5.642e-06	0.000588179
ARGININE.SYN4.PWY-.L.ornithine.biosynthesis.II	mode_of_delivery	Vaginal	0.00342074	0.00342074	0.000758509	293	275	9.45488e-06	0.000927691
PWY-822..fructan.biosynthesis	visit_age_mo	visit_age_mo	-0.000879724	0.000879724	0.000196212	293	179	1.06119e-05	0.000931617
PYRIDNUCSYN.PWY-.NAD.de.novo.biosynthesis.I..from.aspartate.	mode_of_delivery	Vaginal	0.00294138	0.00294138	0.000654383	293	283	1.00962e-05	0.000931617
PWY-6630..superpathway.of.L.tyrosine.biosynthesis	mode_of_delivery	Vaginal	-0.00284217	0.00284217	0.000643686	293	284	1.42737e-05	0.00119043
PWY-5265..peptidoglycan.biosynthesis.II..staphylococci.	visit_age_mo	visit_age_mo	-0.00134554	0.00134554	0.000310626	293	180	2.04549e-05	0.00162471
COLANSYN.PWY-.colanic.acid.building.blocks.biosynthesis	mode_of_delivery	Vaginal	0.00322504	0.00322504	0.00074684	293	243	2.16623e-05	0.0016424
PWY-7323..superpathway.of.GDP.mannose.derived.O.antigen.building.blocks.biosynthesis	mode_of_delivery	Vaginal	0.00290124	0.00290124	0.000683713	293	243	2.9723e-05	0.00215556
ARGSYN.PWY-.L.arginine.biosynthesis.I..via.L.ornithine.	mode_of_delivery	Vaginal	-0.00268344	0.00268344	0.000640468	293	292	3.71648e-05	0.00258295
ARGSYNBSUB.PWY-.L.arginine.biosynthesis.II..acetyl.cycle.	mode_of_delivery	Vaginal	-0.00279992	0.00279992	0.000672667	293	291	4.16313e-05	0.00269662
PPGPPMET.PWY-.ppGpp.metabolism	mode_of_delivery	Vaginal	-0.00315664	0.00315664	0.000758792	293	254	4.20336e-05	0.00269662
PWY-5367..petroselinate.biosynthesis	visit_age_mo	visit_age_mo	-0.00113166	0.00113166	0.000273635	293	237	4.64811e-05	0.00276895
PWY-.1241..ADP.L.glycero..beta..D.manno.heptose.biosynthesis	mode_of_delivery	Vaginal	-0.00313712	0.00313712	0.000758468	293	275	4.63941e-05	0.00276895
HEMESYN2.PWY-.heme.b.biosynthesis.II..oxygen.independent.	mode_of_delivery	Vaginal	-0.00318446	0.00318446	0.000776852	293	284	5.39712e-05	0.00310427
PWY-5690..TCA.cycle.II..plants.and.fungi.	symptoms	AP	-0.000966987	0.000966987	0.000237664	293	46	6.10975e-05	0.00333681
PWY-.1298..superpathway.of.pyrimidine.deoxyribonucleosides.degradation	mode_of_delivery	Vaginal	-0.00247869	0.00247869	0.000609758	293	288	6.2015e-05	0.00333681
DTDPRHAMSYN.PWY-.dTDP..beta..L.rhamnose.biosynthesis	mode_of_delivery	Vaginal	0.00383452	0.00383452	0.000948221	293	292	6.75487e-05	0.00341428
PWY-5104..L.isoleucine.biosynthesis.IV	mode_of_delivery	Vaginal	0.00174127	0.00174127	0.000430044	293	78	6.61579e-05	0.00341428
RUMP.PWY-.formaldehyde.oxidation.I	visit_age_mo	visit_age_mo	-0.000655293	0.000655293	0.000164268	293	114	8.41543e-05	0.00412851
PWY-3001..superpathway.of.L.isoleucine.biosynthesis.I	mode_of_delivery	Vaginal	-0.00223868	0.00223868	0.00057939	293	293	0.000137933	0.00657349
PWY-8178..pentose.phosphate.pathway..non.oxidative.branch..II	mode_of_delivery	Vaginal	-0.00269948	0.00269948	0.000700622	293	292	0.000143898	0.00666728
PWY-7391..isoprene.biosynthesis.II..engineered.	visit_age_mo	visit_age_mo	-0.00052967	0.00052967	0.000138562	293	101	0.000161845	0.00729616
HEME.BIOSYNTHESIS.II..heme.b.biosynthesis.I..aerobic.	mode_of_delivery	Vaginal	-0.00268764	0.00268764	0.000705623	293	281	0.00017064	0.00732872
PWY-.1296..purine.ribonucleosides.degradation	mode_of_delivery	Vaginal	-0.00295243	0.00295243	0.000775363	293	291	0.000171355	0.00732872
PWY-7185..UTP.and.CTP.dephosphorylation.I	visit_age_mo	visit_age_mo	0.00180222	0.00180222	0.000481333	293	170	0.000218474	0.00911038
TRNA.CHARGING.PWY-.tRNA.charging	visit_age_mo	visit_age_mo	-0.000735096	0.000735096	0.000198742	293	293	0.000259438	0.0105547
PWY-6703..preQ0.biosynthesis	visit_age_mo	visit_age_mo	-0.00108356	0.00108356	0.000295058	293	293	0.000286411	0.0113746
PWY-4984..urea.cycle	mode_of_delivery	Vaginal	0.00242013	0.00242013	0.000664155	293	164	0.000318431	0.0123522
PWY-7185..UTP.and.CTP.dephosphorylation.I	probiotics_firstyr	probiotics_firstyr	0.00206365	0.00206365	0.000568553	293	170	0.000335742	0.0127277
PWY-7210..pyrimidine.deoxyribonucleotides.biosynthesis.from.CTP	probiotics_firstyr	probiotics_firstyr	0.00164758	0.00164758	0.000455371	293	170	0.000350386	0.0129877
PWY-5005..biotin.biosynthesis.II	mode_of_delivery	Vaginal	-0.00259634	0.00259634	0.000719825	293	174	0.000365177	0.0132416
PWY-6700..queuosine.biosynthesis.I..de.novo.	visit_age_mo	visit_age_mo	-0.00104832	0.00104832	0.000291325	293	291	0.000376684	0.0133683
PWY-6628..superpathway.of.L.phenylalanine.biosynthesis	mode_of_delivery	Vaginal	-0.00218512	0.00218512	0.000610653	293	288	0.000405579	0.0140939
NONOXIPENT.PWY-.pentose.phosphate.pathway..non.oxidative.branch..I	mode_of_delivery	Vaginal	-0.00269404	0.00269404	0.000758831	293	292	0.000449342	0.015296
NAD.BIOSYNTHESIS.II..NAD.salvage.pathway.III..to.nicotinamide.riboside.	mode_of_delivery	Vaginal	-0.00194714	0.00194714	0.000551516	293	260	0.000482706	0.0157873
P221.PWY-.octane.oxidation	mode_of_delivery	Vaginal	-0.00131906	0.00131906	0.000373572	293	177	0.000481992	0.0157873
PWY-5981..CDP.diacylglycerol.biosynthesis.III	probiotics_firstyr	probiotics_firstyr	0.00111662	0.00111662	0.000317089	293	281	0.000498782	0.0159994
PWY-181..photorespiration	visit_age_mo	visit_age_mo	-0.000270639	0.000270639	7.74145e-05	293	24	0.000546798	0.0172087
PWY-6284..superpathway.of.unsaturated.fatty.acids.biosynthesis..E..coli.	visit_age_mo	visit_age_mo	-0.00123916	0.00123916	0.000356304	293	236	0.000583589	0.0176987
PWY-7883..anhydromuropeptides.recycling.II	mode_of_delivery	Vaginal	-0.00215116	0.00215116	0.00061774	293	256	0.00057427	0.0176987
PWY-7208..superpathway.of.pyrimidine.nucleobases.salvage	visit_age_mo	visit_age_mo	-0.00125958	0.00125958	0.000363459	293	292	0.000609728	0.0181612
PWY-5837..2.carboxy.1.4.naphthoquinol.biosynthesis	mode_of_delivery	Vaginal	-0.00241271	0.00241271	0.000699717	293	283	0.000648764	0.0186576
PWY-.1477..ethanolamine.utilization	mode_of_delivery	Vaginal	-0.00357504	0.00357504	0.00103601	293	283	0.000642663	0.0186576
P122.PWY-.heterolactic.fermentation	mode_of_delivery	Vaginal	-0.00204197	0.00204197	0.000593289	293	239	0.000663559	0.0187596	P122-PWY	SCFA
PWY-6168..flavin.biosynthesis.III..fungi.	probiotics_firstyr	probiotics_firstyr	-0.00140174	0.00140174	0.0004086	293	150	0.000690405	0.0188786
PWY-822..fructan.biosynthesis	mode_of_delivery	Vaginal	-0.00148439	0.00148439	0.000432479	293	179	0.000686263	0.0188786
PWY-5695..inosine.5..phosphate.degradation	visit_age_mo	visit_age_mo	-0.000913363	0.000913363	0.000268391	293	293	0.000760727	0.0192256
PWY-7013...S..propane.1.2.diol.degradation	mode_of_delivery	Vaginal	-0.00361929	0.00361929	0.00106254	293	178	0.000752355	0.0192256	PWY-7013	SCFA
PWY-7220..adenosine.deoxyribonucleotides.de.novo.biosynthesis.II	visit_age_mo	visit_age_mo	-0.00124221	0.00124221	0.000364044	293	293	0.000736624	0.0192256
PWY-7222..guanosine.deoxyribonucleotides.de.novo.biosynthesis.II	visit_age_mo	visit_age_mo	-0.00124221	0.00124221	0.000364044	293	293	0.000736624	0.0192256
PWY-922..mevalonate.pathway.I..eukaryotes.and.bacteria.	visit_age_mo	visit_age_mo	-0.000596233	0.000596233	0.000175055	293	170	0.000753089	0.0192256
P562.PWY-.myo.inositol.degradation.I	visit_age_mo	visit_age_mo	0.000598372	0.000598372	0.000176057	293	88	0.000772494	0.0192316
PWY-5464..superpathway.of.cytosolic.glycolysis..plants...pyruvate.dehydrogenase.and.TCA.cycle	symptoms	AP	-0.000639514	0.000639514	0.000189193	293	27	0.000824322	0.0199271
PWY-6126..superpathway.of.adenosine.nucleotides.de.novo.biosynthesis.II	visit_age_mo	visit_age_mo	-0.00116752	0.00116752	0.000344991	293	293	0.000812866	0.0199271
PWY-7197..pyrimidine.deoxyribonucleotide.phosphorylation	mode_of_delivery	Vaginal	-0.00262853	0.00262853	0.000779654	293	292	0.000850099	0.0202567
PWY-5100..pyruvate.fermentation.to.acetate.and.lactate.II	mode_of_delivery	Vaginal	-0.00256131	0.00256131	0.000764472	293	290	0.000914509	0.0209198	PWY-5100	SCFA
PWY-7199..pyrimidine.deoxyribonucleosides.salvage	visit_age_mo	visit_age_mo	-0.000978075	0.000978075	0.000291954	293	291	0.000915556	0.0209198
PWY-7873..D.erythronate.degradation.II	symptoms	AP	0.00099671	0.00099671	0.000296968	293	85	0.000896081	0.0209198
GLUTORN.PWY-.L.ornithine.biosynthesis.I	mode_of_delivery	Vaginal	-0.00195876	0.00195876	0.000587109	293	292	0.000960525	0.0211278
PWY-7210..pyrimidine.deoxyribonucleotides.biosynthesis.from.CTP	visit_age_mo	visit_age_mo	0.00128607	0.00128607	0.000385514	293	170	0.000961491	0.0211278
PWY-7229..superpathway.of.adenosine.nucleotides.de.novo.biosynthesis.I	visit_age_mo	visit_age_mo	-0.00111051	0.00111051	0.000332923	293	293	0.000962658	0.0211278
PWY-6549..L.glutamine.biosynthesis.III	symptoms	AP	-0.00160289	0.00160289	0.000482012	293	113	0.000997269	0.0216032
PWY-6.429..fatty.acid.biosynthesis.initiation..mitochondria.	visit_age_mo	visit_age_mo	-0.000993891	0.000993891	0.000299742	293	293	0.00103082	0.0220438
KETOGLUCONMET.PWY-.ketogluconate.metabolism	symptoms	AP	0.00294224	0.00294224	0.0008893	293	206	0.00105721	0.0223218
ARO.PWY-.chorismate.biosynthesis.I	mode_of_delivery	Vaginal	-0.00174631	0.00174631	0.000530436	293	293	0.00111793	0.0233088
PWY-7211..superpathway.of.pyrimidine.deoxyribonucleotides.de.novo.biosynthesis	visit_age_mo	visit_age_mo	0.00103736	0.00103736	0.000316373	293	150	0.00116998	0.0239724
PWY-6.389..phytol.degradation	mode_of_delivery	Vaginal	-0.00180072	0.00180072	0.000549538	293	195	0.0011785	0.0239724
PWY-7209..superpathway.of.pyrimidine.ribonucleosides.degradation	symptoms	AP	0.00156106	0.00156106	0.000477528	293	144	0.00121004	0.0243175
PWY-7328..superpathway.of.UDP.glucose.derived.O.antigen.building.blocks.biosynthesis	visit_age_mo	visit_age_mo	0.00104731	0.00104731	0.000321432	293	245	0.00125524	0.0249255
P161.PWY-.acetylene.degradation..anaerobic.	mode_of_delivery	Vaginal	-0.00245983	0.00245983	0.000757707	293	277	0.00130671	0.025179	P161-PWY	SCFA
PWY-241..C4.photosynthetic.carbon.assimilation.cycle..NADP.ME.type	mode_of_delivery	Vaginal	0.00178568	0.00178568	0.000550299	293	269	0.00131329	0.025179
PWY-724..superpathway.of.L.lysine..L.threonine.and.L.methionine.biosynthesis.II	mode_of_delivery	Vaginal	-0.00168773	0.00168773	0.000519663	293	293	0.00130081	0.025179
PWY-8131..5..deoxyadenosine.degradation.II	mode_of_delivery	Vaginal	-0.00215164	0.00215164	0.000664357	293	199	0.00134133	0.0254244
VALSYN.PWY-.L.valine.biosynthesis	mode_of_delivery	Vaginal	-0.00200345	0.00200345	0.00061993	293	293	0.00137317	0.0257353
PWY-5103..L.isoleucine.biosynthesis.III	mode_of_delivery	Vaginal	-0.00197336	0.00197336	0.000614002	293	293	0.00145808	0.0270231
OANTIGEN.PWY-.O.antigen.building.blocks.biosynthesis..E..coli.	visit_age_mo	visit_age_mo	0.000874699	0.000874699	0.00027478	293	288	0.00161567	0.028954
P164.PWY-.purine.nucleobases.degradation.I..anaerobic.	symptoms	AP	-0.0021403	0.0021403	0.00067198	293	117	0.00160605	0.028954
PWY-7208..superpathway.of.pyrimidine.nucleobases.salvage	mode_of_delivery	Vaginal	-0.00255218	0.00255218	0.000801113	293	292	0.00160217	0.028954
TRPSYN.PWY-.L.tryptophan.biosynthesis	mode_of_delivery	Vaginal	-0.0021426	0.0021426	0.000673707	293	289	0.0016317	0.028954
ILEUSYN.PWY-.L.isoleucine.biosynthesis.I..from.threonine.	mode_of_delivery	Vaginal	-0.00200329	0.00200329	0.000630652	293	293	0.00165237	0.0290122
PWY-6572..chondroitin.sulfate.degradation.I..bacterial.	mode_of_delivery	Vaginal	0.00137699	0.00137699	0.000434383	293	36	0.00168868	0.0290384
PWY-8131..5..deoxyadenosine.degradation.II	probiotics_firstyr	probiotics_firstyr	0.00112884	0.00112884	0.000356031	293	199	0.00168512	0.0290384
PWY-LZ.257..superpathway.of.fermentation..Chlamydomonas.reinhardtii.	mode_of_delivery	Vaginal	-0.00237267	0.00237267	0.000751693	293	236	0.0017664	0.0300278
PWY-6.389..phytol.degradation	symptoms	AP	-0.00189122	0.00189122	0.000599675	293	195	0.00178223	0.0300278
PWY-6121..5.aminoimidazole.ribonucleotide.biosynthesis.I	mode_of_delivery	Vaginal	-0.00186474	0.00186474	0.00059318	293	293	0.00184287	0.0307391
COMPLETE.ARO.PWY-.superpathway.of.aromatic.amino.acid.biosynthesis	mode_of_delivery	Vaginal	-0.00158519	0.00158519	0.00050776	293	293	0.00197942	0.0312596
PWY-6124..inosine.5..phosphate.biosynthesis.II	visit_age_mo	visit_age_mo	-0.000763675	0.000763675	0.000244234	293	293	0.00194782	0.0312596
PWY-6125..superpathway.of.guanosine.nucleotides.de.novo.biosynthesis.II	visit_age_mo	visit_age_mo	-0.00113715	0.00113715	0.000364047	293	292	0.00196827	0.0312596
PWY-7234..inosine.5..phosphate.biosynthesis.III	mode_of_delivery	Vaginal	-0.00191637	0.00191637	0.000613393	293	290	0.00196457	0.0312596
PWY-7874..L.threonate.degradation	symptoms	AP	0.00103305	0.00103305	0.000331018	293	119	0.00198652	0.0312596
PWY-I9..L.cysteine.biosynthesis.VI..from.L.methionine.	mode_of_delivery	Vaginal	-0.00219637	0.00219637	0.000701261	293	292	0.00191472	0.0312596
GOLPDLCAT.PWY-.superpathway.of.glycerol.degradation.to.1.3.propanediol	mode_of_delivery	Vaginal	-0.00187626	0.00187626	0.000602041	293	167	0.00201493	0.0314104
GLUCUROCAT.PWY-.superpathway.of..beta..D.glucuronosides.degradation	mode_of_delivery	Vaginal	0.0020704	0.0020704	0.000668463	293	222	0.00214589	0.0324352
PWY-6545..pyrimidine.deoxyribonucleotides.de.novo.biosynthesis.III	visit_age_mo	visit_age_mo	0.000856956	0.000856956	0.000276525	293	191	0.00213355	0.0324352
PWY-7400..L.arginine.biosynthesis.IV..archaebacteria.	mode_of_delivery	Vaginal	-0.00205565	0.00205565	0.000662681	293	284	0.00211279	0.0324352
PYRIDNUCSYN.PWY-.NAD.de.novo.biosynthesis.I..from.aspartate.	visit_age_mo	visit_age_mo	0.000919009	0.000919009	0.000296889	293	283	0.00215846	0.0324352
PWY-5690..TCA.cycle.II..plants.and.fungi.	visit_age_mo	visit_age_mo	0.000303557	0.000303557	9.88114e-05	293	46	0.00232898	0.0346852
PWY-7446..sulfoquinovose.degradation.I	probiotics_firstyr	probiotics_firstyr	0.000846358	0.000846358	0.00027669	293	106	0.00243078	0.0358809
PWY-6629..superpathway.of.L.tryptophan.biosynthesis	mode_of_delivery	Vaginal	-0.0017337	0.0017337	0.000567422	293	289	0.00245823	0.0359678
P124.PWY-.Bifidobacterium.shunt	visit_age_mo	visit_age_mo	0.00122604	0.00122604	0.000402182	293	109	0.00251382	0.0362545	P124-PWY	SCFA
PWY-7663..gondoate.biosynthesis..anaerobic.	visit_age_mo	visit_age_mo	-0.000819312	0.000819312	0.000268896	293	293	0.00252607	0.0362545
PWY-7858...5Z..dodecenoate.biosynthesis.II	mode_of_delivery	Vaginal	-0.0021341	0.0021341	0.000700883	293	273	0.00254303	0.0362545
PWY-7228..superpathway.of.guanosine.nucleotides.de.novo.biosynthesis.I	visit_age_mo	visit_age_mo	-0.00113944	0.00113944	0.000374698	293	292	0.00257533	0.0364039
PWY-7165..L.ascorbate.biosynthesis.VIII..engineered.pathway.	visit_age_mo	visit_age_mo	0.000406359	0.000406359	0.000134314	293	29	0.00270686	0.0379415
PWY-5973..cis.vaccenate.biosynthesis	visit_age_mo	visit_age_mo	-0.000778347	0.000778347	0.000258094	293	293	0.00279201	0.0387746
PWY-6823..molybdopterin.biosynthesis	visit_age_mo	visit_age_mo	-0.0009567	0.0009567	0.000317478	293	288	0.00281279	0.0387746
PWY-6936..seleno.amino.acid.biosynthesis..plants.	mode_of_delivery	Vaginal	-0.00205636	0.00205636	0.000683024	293	293	0.00283775	0.0387981
PYRIDOXSYN.PWY-.pyridoxal.5..phosphate.biosynthesis.I	mode_of_delivery	Vaginal	0.0020355	0.0020355	0.000679113	293	265	0.00296122	0.040157
P108.PWY-.pyruvate.fermentation.to.propanoate.I	symptoms	AP	-0.00184106	0.00184106	0.000617264	293	167	0.00310249	0.0406648	P108-PWY	SCFA
P125.PWY-.superpathway.of..R.R..butanediol.biosynthesis	mode_of_delivery	Vaginal	-0.00135148	0.00135148	0.000452681	293	185	0.00307411	0.0406648
PWY-6285..superpathway.of.fatty.acids.biosynthesis..E..coli.	visit_age_mo	visit_age_mo	-0.0011695	0.0011695	0.000391367	293	229	0.0030476	0.0406648
PWY-7197..pyrimidine.deoxyribonucleotide.phosphorylation	visit_age_mo	visit_age_mo	-0.00105437	0.00105437	0.000353723	293	292	0.00312056	0.0406648
PWY-O.4107..NAD.salvage.pathway.V..PNC.V.cycle.	visit_age_mo	visit_age_mo	0.000982331	0.000982331	0.000329433	293	247	0.00310964	0.0406648
PWY-.41..allantoin.degradation.IV..anaerobic.	probiotics_firstyr	probiotics_firstyr	-0.000382209	0.000382209	0.000128716	293	101	0.00323484	0.0418272
PWY-.1586..peptidoglycan.maturation..meso.diaminopimelate.containing.	mode_of_delivery	Vaginal	-0.00278838	0.00278838	0.000940177	293	293	0.00327184	0.0419802
PROTOCATECHUATE.ORTHO.CLEAVAGE.PWY-.protocatechuate.degradation.II..ortho.cleavage.pathway.	mode_of_delivery	Vaginal	-0.00144843	0.00144843	0.000491148	293	102	0.00344874	0.0436645
PWY-7316..dTDP.N.acetylviosamine.biosynthesis	mode_of_delivery	Vaginal	0.00130071	0.00130071	0.000441152	293	32	0.00345547	0.0436645
PWY-6185..4.methylcatechol.degradation..ortho.cleavage.	mode_of_delivery	Vaginal	-0.00124985	0.00124985	0.00042444	293	83	0.00349631	0.0438485
PWY-6.409..superpathway.of.purine.nucleotide.salvage	visit_age_mo	visit_age_mo	-0.00091543	0.00091543	0.000311253	293	284	0.00353582	0.044013
GOLPDLCAT.PWY-.superpathway.of.glycerol.degradation.to.1.3.propanediol	visit_age_mo	visit_age_mo	0.000799655	0.000799655	0.000273141	293	167	0.00368817	0.0449041
PWY-6545..pyrimidine.deoxyribonucleotides.de.novo.biosynthesis.III	probiotics_firstyr	probiotics_firstyr	0.000956669	0.000956669	0.000326632	293	191	0.00367365	0.0449041
PWY-6609..adenine.and.adenosine.salvage.III	visit_age_mo	visit_age_mo	-0.000834633	0.000834633	0.000284808	293	293	0.00365503	0.0449041
PWY-7391..isoprene.biosynthesis.II..engineered.	mode_of_delivery	Vaginal	-0.000892981	0.000892981	0.000305411	293	101	0.00373159	0.0451035
PWY-7942..5.oxo.L.proline.metabolism	mode_of_delivery	Vaginal	-0.00186877	0.00186877	0.000641783	293	225	0.00387405	0.0464886
PWY-5913..partial.TCA.cycle..obligate.autotrophs.	mode_of_delivery	Vaginal	-0.00211446	0.00211446	0.000729016	293	281	0.00401363	0.0474804
PWY-.1479..tRNA.processing	mode_of_delivery	Vaginal	-0.00202509	0.00202509	0.000698064	293	271	0.00400651	0.0474804
HISDEG.PWY-.L.histidine.degradation.I	symptoms	AP	-0.0027533	0.0027533	0.000954129	293	249	0.00420122	0.0493495
PWY-7111..pyruvate.fermentation.to.isobutanol..engineered.	mode_of_delivery	Vaginal	-0.00204348	0.00204348	0.000710924	293	293	0.00434954	0.0507345
P562.PWY-.myo.inositol.degradation.I	probiotics_firstyr	probiotics_firstyr	0.000592653	0.000592653	0.00020796	293	88	0.00468972	0.0543226
PWY-7211..superpathway.of.pyrimidine.deoxyribonucleotides.de.novo.biosynthesis	probiotics_firstyr	probiotics_firstyr	0.00106256	0.00106256	0.000373701	293	150	0.00478399	0.0550324
PWY-6168..flavin.biosynthesis.III..fungi.	mode_of_delivery	Vaginal	0.00215913	0.00215913	0.000762451	293	150	0.00495449	0.0554637
PWY-7234..inosine.5..phosphate.biosynthesis.III	visit_age_mo	visit_age_mo	-0.000789554	0.000789554	0.000278291	293	290	0.00487497	0.0554637
PWY-7356..thiamine.diphosphate.salvage.IV..yeast.	mode_of_delivery	Vaginal	-0.0020502	0.0020502	0.000723671	293	256	0.00493618	0.0554637
SALVADEHYPOX.PWY-.adenosine.nucleotides.degradation.II	probiotics_firstyr	probiotics_firstyr	-0.00177184	0.00177184	0.000625517	293	211	0.0049429	0.0554637
PWY-6478..GDP.D.glycero..alpha..D.manno.heptose.biosynthesis	mode_of_delivery	Vaginal	0.000650262	0.000650262	0.000230616	293	24	0.00514089	0.0567882
PWY-.845..superpathway.of.pyridoxal.5..phosphate.biosynthesis.and.salvage	mode_of_delivery	Vaginal	0.00195809	0.00195809	0.000694393	293	265	0.00513789	0.0567882
ARGININE.SYN4.PWY-.L.ornithine.biosynthesis.II	probiotics_firstyr	probiotics_firstyr	-0.00114093	0.00114093	0.000406488	293	275	0.00534507	0.0578933
PWY-6163..chorismate.biosynthesis.from.3.dehydroquinate	mode_of_delivery	Vaginal	-0.00152123	0.00152123	0.000541894	293	293	0.00533791	0.0578933
PWY-6185..4.methylcatechol.degradation..ortho.cleavage.	symptoms	AP	-0.00130181	0.00130181	0.000463164	293	83	0.00528257	0.0578933
BRANCHED.CHAIN.AA.SYN.PWY-.superpathway.of.branched.chain.amino.acid.biosynthesis	mode_of_delivery	Vaginal	-0.00172745	0.00172745	0.000618056	293	293	0.005539	0.0596068
GLYCOL.GLYOXDEG.PWY-.superpathway.of.glycol.metabolism.and.degradation	symptoms	AP	0.00131664	0.00131664	0.000472831	293	174	0.00571465	0.0598438
HEME.BIOSYNTHESIS.II..heme.b.biosynthesis.I..aerobic.	visit_age_mo	visit_age_mo	-0.000891386	0.000891386	0.000320136	293	281	0.00571789	0.0598438
P185.PWY-.formaldehyde.assimilation.III..dihydroxyacetone.cycle.	probiotics_firstyr	probiotics_firstyr	0.0010582	0.0010582	0.000380237	293	187	0.00574182	0.0598438
PWY-6122..5.aminoimidazole.ribonucleotide.biosynthesis.II	mode_of_delivery	Vaginal	-0.00165485	0.00165485	0.000595052	293	293	0.00577629	0.0598438
PWY-6277..superpathway.of.5.aminoimidazole.ribonucleotide.biosynthesis	mode_of_delivery	Vaginal	-0.00165485	0.00165485	0.000595052	293	293	0.00577629	0.0598438
PWY-.1297..superpathway.of.purine.deoxyribonucleosides.degradation	visit_age_mo	visit_age_mo	-0.000806184	0.000806184	0.000289317	293	291	0.00568179	0.0598438
P164.PWY-.purine.nucleobases.degradation.I..anaerobic.	mode_of_delivery	Vaginal	-0.00170969	0.00170969	0.000615798	293	117	0.00585709	0.0603064
ECASYN.PWY-.enterobacterial.common.antigen.biosynthesis	mode_of_delivery	Vaginal	-0.00171914	0.00171914	0.000620387	293	208	0.00595068	0.0608941
PENTOSE.P.PWY-.pentose.phosphate.pathway	symptoms	AP	0.0017133	0.0017133	0.000621585	293	292	0.00621825	0.0632442
PWY-6292..superpathway.of.L.cysteine.biosynthesis..mammalian.	mode_of_delivery	Vaginal	-0.00131051	0.00131051	0.000477344	293	206	0.00642324	0.0649331
PWY-2942..L.lysine.biosynthesis.III	mode_of_delivery	Vaginal	0.002543	0.002543	0.000939022	293	256	0.00717092	0.0719796
PWY-5855..ubiquinol.7.biosynthesis..early.decarboxylation.	mode_of_delivery	Vaginal	-0.00155539	0.00155539	0.000574697	293	234	0.00720659	0.0719796
PROTOCATECHUATE.ORTHO.CLEAVAGE.PWY-.protocatechuate.degradation.II..ortho.cleavage.pathway.	symptoms	AP	-0.00144054	0.00144054	0.000535957	293	102	0.0076112	0.074984
PWY-6470..peptidoglycan.biosynthesis.V...beta..lactam.resistance.	symptoms	AP	-0.00122571	0.00122571	0.000455822	293	68	0.00758391	0.074984
PWY-.1261..anhydromuropeptides.recycling.I	mode_of_delivery	Vaginal	-0.00181481	0.00181481	0.000675556	293	274	0.00764226	0.074984
PWY-7198..pyrimidine.deoxyribonucleotides.de.novo.biosynthesis.IV	probiotics_firstyr	probiotics_firstyr	0.00116671	0.00116671	0.000435277	293	247	0.00777756	0.0754631
PWY-7357..thiamine.phosphate.formation.from.pyrithiamine.and.oxythiamine..yeast.	mode_of_delivery	Vaginal	-0.00141779	0.00141779	0.000528986	293	293	0.00778157	0.0754631
PWY-5656..mannosylglycerate.biosynthesis.I	mode_of_delivery	Vaginal	0.00180877	0.00180877	0.000675883	293	156	0.00787369	0.0759151
PWY-5497..purine.nucleobases.degradation.II..anaerobic.	mode_of_delivery	Vaginal	0.00146795	0.00146795	0.000549573	293	171	0.00799109	0.0766043
CATECHOL.ORTHO.CLEAVAGE.PWY-.catechol.degradation.to..beta..ketoadipate	symptoms	AP	-0.00114086	0.00114086	0.000428584	293	76	0.00820576	0.0782126
PWY-6353..purine.nucleotides.degradation.II..aerobic.	probiotics_firstyr	probiotics_firstyr	-0.00142944	0.00142944	0.00053925	293	211	0.0084745	0.0803151
PWY-4984..urea.cycle	symptoms	AP	-0.00191925	0.00191925	0.000724748	293	164	0.00853915	0.0804706
DARABCATK12.PWY-.D.arabinose.degradation.I	symptoms	AP	0.0012337	0.0012337	0.000466839	293	174	0.00867567	0.0812978
P41.PWY-.pyruvate.fermentation.to.acetate.and..S..lactate.I	mode_of_delivery	Vaginal	-0.0021095	0.0021095	0.000799205	293	290	0.0087552	0.0813082	P41-PWY	SCFA
PWY-8131..5..deoxyadenosine.degradation.II	symptoms	AP	-0.00191301	0.00191301	0.00072497	293	199	0.00877426	0.0813082
GLYCOLYSIS..glycolysis.I..from.glucose.6.phosphate.	visit_age_mo	visit_age_mo	-0.000631759	0.000631759	0.000240091	293	290	0.00896317	0.082146
PWY-7790..UMP.biosynthesis.II	mode_of_delivery	Vaginal	-0.00152419	0.00152419	0.000579187	293	293	0.00895633	0.082146
PWY-7209..superpathway.of.pyrimidine.ribonucleosides.degradation	probiotics_firstyr	probiotics_firstyr	-0.000615864	0.000615864	0.000234513	293	144	0.00909776	0.0829238
PWY-6182..superpathway.of.salicylate.degradation	visit_age_mo	visit_age_mo	0.000374014	0.000374014	0.000142634	293	56	0.00920103	0.0834094
PWY-6992..1.5.anhydrofructose.degradation	mode_of_delivery	Vaginal	0.00110469	0.00110469	0.000421646	293	91	0.0092609	0.0834983
GLYCOCAT.PWY-.glycogen.degradation.I	visit_age_mo	visit_age_mo	0.000955549	0.000955549	0.000365191	293	258	0.00935052	0.083853
PWY-6123..inosine.5..phosphate.biosynthesis.I	visit_age_mo	visit_age_mo	-0.000637581	0.000637581	0.00024389	293	293	0.00941372	0.0839684
HEXITOLDEGSUPER.PWY-.superpathway.of.hexitol.degradation..bacteria.	probiotics_firstyr	probiotics_firstyr	-0.00127677	0.00127677	0.000488835	293	163	0.00947693	0.0840826
PWY-841..superpathway.of.purine.nucleotides.de.novo.biosynthesis.I	visit_age_mo	visit_age_mo	-0.000843939	0.000843939	0.000323931	293	292	0.00965604	0.0852184
PWY-6936..seleno.amino.acid.biosynthesis..plants.	visit_age_mo	visit_age_mo	-0.000805471	0.000805471	0.000309882	293	293	0.00982332	0.0857869
PWY-6.409..superpathway.of.purine.nucleotide.salvage	mode_of_delivery	Vaginal	-0.00178428	0.00178428	0.000686045	293	284	0.0097802	0.0857869
P185.PWY-.formaldehyde.assimilation.III..dihydroxyacetone.cycle.	visit_age_mo	visit_age_mo	0.000833432	0.000833432	0.000321906	293	187	0.010113	0.0874265
PWY-5910..superpathway.of.geranylgeranyldiphosphate.biosynthesis.I..via.mevalonate.	visit_age_mo	visit_age_mo	-0.00044142	0.00044142	0.000170502	293	153	0.0101159	0.0874265
PWY-7409..phospholipid.remodeling..phosphatidylethanolamine..yeast.	symptoms	AP	0.00136038	0.00136038	0.000526342	293	123	0.0102416	0.0876048
PYRIDNUCSAL.PWY-.NAD.salvage.pathway.I..PNC.VI.cycle.	visit_age_mo	visit_age_mo	0.000683456	0.000683456	0.000264403	293	242	0.0102325	0.0876048
PWY-6902..chitin.degradation.II..Vibrio.	visit_age_mo	visit_age_mo	0.00101714	0.00101714	0.000394449	293	270	0.0104155	0.088638
CITRULBIO.PWY-.L.citrulline.biosynthesis	probiotics_firstyr	probiotics_firstyr	-0.00102727	0.00102727	0.000399957	293	277	0.0107194	0.0907613
UNINTEGRATED	mode_of_delivery	Vaginal	0.0305059	0.0305059	0.0119043	293	293	0.0108978	0.0913649
PWY-7385..1.3.propanediol.biosynthesis..engineered.	probiotics_firstyr	probiotics_firstyr	-0.000554754	0.000554754	0.000216488	293	91	0.0109003	0.0913649
PWY-6562..norspermidine.biosynthesis	visit_age_mo	visit_age_mo	0.000188066	0.000188066	7.36749e-05	293	24	0.0112067	0.093464
PWY-5692..allantoin.degradation.to.glyoxylate.II	probiotics_firstyr	probiotics_firstyr	-0.000179062	0.000179062	7.03323e-05	293	24	0.0114192	0.0942933
URDEGR.PWY-.superpathway.of.allantoin.degradation.in.plants	probiotics_firstyr	probiotics_firstyr	-0.000179062	0.000179062	7.03323e-05	293	24	0.0114192	0.0942933
GLUCUROCAT.PWY-.superpathway.of..beta..D.glucuronosides.degradation	symptoms	AP	0.00184915	0.00184915	0.000729449	293	222	0.0117742	0.0967455
PWY-5384..sucrose.degradation.IV..sucrose.phosphorylase.	mode_of_delivery	Vaginal	-0.00180345	0.00180345	0.000714415	293	292	0.0121278	0.0991623
POLYISOPRENSYN.PWY-.polyisoprenoid.biosynthesis..E..coli.	visit_age_mo	visit_age_mo	-0.000620203	0.000620203	0.000246145	293	289	0.0122875	0.0998437
PWY-7184..pyrimidine.deoxyribonucleotides.de.novo.biosynthesis.I	probiotics_firstyr	probiotics_firstyr	0.000947456	0.000947456	0.000376213	293	262	0.0123308	0.0998437
PWY-7791..UMP.biosynthesis.III	mode_of_delivery	Vaginal	-0.0014507	0.0014507	0.000578565	293	293	0.0127125	0.102437
PWY-6147..6.hydroxymethyl.dihydropterin.diphosphate.biosynthesis.I	visit_age_mo	visit_age_mo	-0.000833781	0.000833781	0.000332866	293	291	0.0128026	0.102667
HISDEG.PWY-.L.histidine.degradation.I	mode_of_delivery	Vaginal	0.00218484	0.00218484	0.000874358	293	249	0.0130187	0.103405
PWY-5837..2.carboxy.1.4.naphthoquinol.biosynthesis	visit_age_mo	visit_age_mo	-0.000793383	0.000793383	0.000317456	293	283	0.0130046	0.103405
PWY-1861..formaldehyde.assimilation.II..assimilatory.RuMP.Cycle.	visit_age_mo	visit_age_mo	-0.000920642	0.000920642	0.000370082	293	231	0.013424	0.106119
PWY-6435..4.hydroxybenzoate.biosynthesis.III..plants.	probiotics_firstyr	probiotics_firstyr	-0.000266314	0.000266314	0.000107833	293	22	0.0141026	0.110437
PWY-O.4107..NAD.salvage.pathway.V..PNC.V.cycle.	probiotics_firstyr	probiotics_firstyr	-0.0009615	0.0009615	0.000389128	293	247	0.0140557	0.110437
LIPA.CORESYN.PWY-.lipid.A.core.biosynthesis..E..coli.K.12.	probiotics_firstyr	probiotics_firstyr	-0.00029408	0.00029408	0.000119371	293	40	0.0143407	0.110742
PPGPPMET.PWY-.ppGpp.metabolism	probiotics_firstyr	probiotics_firstyr	0.00100201	0.00100201	0.000406639	293	254	0.0143189	0.110742
REDCITCYC..TCA.cycle.VI..Helicobacter.	mode_of_delivery	Vaginal	-0.00127617	0.00127617	0.000517546	293	165	0.0142531	0.110742
PWY-.1221..putrescine.degradation.II	mode_of_delivery	Vaginal	0.000448761	0.000448761	0.000182572	293	26	0.0145603	0.111406
THISYNARA.PWY-.superpathway.of.thiamine.diphosphate.biosynthesis.III..eukaryotes.	mode_of_delivery	Vaginal	0.00173112	0.00173112	0.000703864	293	280	0.0145025	0.111406
UBISYN.PWY-.superpathway.of.ubiquinol.8.biosynthesis..early.decarboxylation.	symptoms	AP	0.000932854	0.000932854	0.00038251	293	96	0.0153414	0.116847
PWY-7229..superpathway.of.adenosine.nucleotides.de.novo.biosynthesis.I	mode_of_delivery	Vaginal	-0.00178826	0.00178826	0.000733809	293	293	0.0154167	0.116887
PWY-7315..dTDP.N.acetylthomosamine.biosynthesis	mode_of_delivery	Vaginal	-0.00156348	0.00156348	0.000642164	293	248	0.015511	0.117069
PWY-1042..glycolysis.IV	mode_of_delivery	Vaginal	-0.00149483	0.00149483	0.00061471	293	292	0.0156353	0.117476
PWY-.1586..peptidoglycan.maturation..meso.diaminopimelate.containing.	visit_age_mo	visit_age_mo	-0.00103619	0.00103619	0.000426551	293	293	0.0157427	0.117753
PWY-6901..superpathway.of.glucose.and.xylose.degradation	symptoms	AP	0.00141439	0.00141439	0.000585023	293	287	0.0162411	0.120938
PWY-6708..ubiquinol.8.biosynthesis..early.decarboxylation.	symptoms	AP	0.000890046	0.000890046	0.000368618	293	96	0.0163782	0.121417
NONOXIPENT.PWY-.pentose.phosphate.pathway..non.oxidative.branch..I	symptoms	AP	0.00199709	0.00199709	0.000828062	293	292	0.0165009	0.121785
GALACTITOLCAT.PWY-.galactitol.degradation	probiotics_firstyr	probiotics_firstyr	-0.00108262	0.00108262	0.000449575	293	169	0.0166646	0.122452
PWY-5188..tetrapyrrole.biosynthesis.I..from.glutamate.	visit_age_mo	visit_age_mo	-0.000813288	0.000813288	0.000338172	293	286	0.0168056	0.122946
METH.ACETATE.PWY-.methanogenesis.from.acetate	symptoms	AP	-0.00100946	0.00100946	0.000420837	293	47	0.01709	0.12394	METH-ACETATE-PWY	Acetate
THISYNARA.PWY-.superpathway.of.thiamine.diphosphate.biosynthesis.III..eukaryotes.	symptoms	AP	0.0018434	0.0018434	0.000768081	293	280	0.0170299	0.12394
OANTIGEN.PWY-.O.antigen.building.blocks.biosynthesis..E..coli.	symptoms	AP	0.00158306	0.00158306	0.000660909	293	288	0.0172461	0.123994
PWY-5484..glycolysis.II..from.fructose.6.phosphate.	visit_age_mo	visit_age_mo	-0.000578655	0.000578655	0.000241475	293	290	0.0171979	0.123994
PWY-5918..superpathway.of.heme.b.biosynthesis.from.glutamate	mode_of_delivery	Vaginal	-0.00155373	0.00155373	0.000649889	293	274	0.0174559	0.124964
PWY-5941..glycogen.degradation.II	mode_of_delivery	Vaginal	-0.00193402	0.00193402	0.000810228	293	291	0.0176315	0.125681
PWY-7198..pyrimidine.deoxyribonucleotides.de.novo.biosynthesis.IV	visit_age_mo	visit_age_mo	0.000877948	0.000877948	0.000368503	293	247	0.0178457	0.126666
LIPA.CORESYN.PWY-.lipid.A.core.biosynthesis..E..coli.K.12.	visit_age_mo	visit_age_mo	-0.000240393	0.000240393	0.000101059	293	40	0.0180238	0.127388
PWY-6317..D.galactose.degradation.I..Leloir.pathway.	mode_of_delivery	Vaginal	-0.00143822	0.00143822	0.000606213	293	290	0.0183267	0.128983
PWY-5417..catechol.degradation.III..ortho.cleavage.pathway.	symptoms	AP	-0.00112137	0.00112137	0.000475482	293	74	0.0190227	0.131294
PWY-5431..aromatic.compounds.degradation.via..beta..ketoadipate	symptoms	AP	-0.00112137	0.00112137	0.000475482	293	74	0.0190227	0.131294
PWY-5981..CDP.diacylglycerol.biosynthesis.III	visit_age_mo	visit_age_mo	-0.00063296	0.00063296	0.000268445	293	281	0.0190486	0.131294
PWY-7254..TCA.cycle.VII..acetate.producers.	probiotics_firstyr	probiotics_firstyr	0.0002551	0.0002551	0.000107979	293	62	0.0188172	0.131294	PWY-7254	Acetate
PWY-7874..L.threonate.degradation	probiotics_firstyr	probiotics_firstyr	-0.00038344	0.00038344	0.000162562	293	119	0.0190058	0.131294
PWY-5464..superpathway.of.cytosolic.glycolysis..plants...pyruvate.dehydrogenase.and.TCA.cycle	visit_age_mo	visit_age_mo	0.000184497	0.000184497	7.86591e-05	293	27	0.0196789	0.13508
THISYNARA.PWY-.superpathway.of.thiamine.diphosphate.biosynthesis.III..eukaryotes.	probiotics_firstyr	probiotics_firstyr	-0.000880313	0.000880313	0.000377203	293	280	0.0202947	0.138736
THRESYN.PWY-.superpathway.of.L.threonine.biosynthesis	mode_of_delivery	Vaginal	-0.00128187	0.00128187	0.000550763	293	293	0.0206344	0.140482
GOLPDLCAT.PWY-.superpathway.of.glycerol.degradation.to.1.3.propanediol	probiotics_firstyr	probiotics_firstyr	0.000749316	0.000749316	0.000322636	293	167	0.0209041	0.14174
LPSSYN.PWY-.superpathway.of.lipopolysaccharide.biosynthesis	probiotics_firstyr	probiotics_firstyr	-0.000351267	0.000351267	0.000151803	293	40	0.0213733	0.142602
PWY-6126..superpathway.of.adenosine.nucleotides.de.novo.biosynthesis.II	mode_of_delivery	Vaginal	-0.00176248	0.00176248	0.000760409	293	293	0.0211608	0.142602
PWY-6545..pyrimidine.deoxyribonucleotides.de.novo.biosynthesis.III	symptoms	AP	-0.00153922	0.00153922	0.000665106	293	191	0.0213579	0.142602
PWY-.42..2.methylcitrate.cycle.I	symptoms	AP	0.00154376	0.00154376	0.000666824	293	167	0.0213108	0.142602
PWY-8178..pentose.phosphate.pathway..non.oxidative.branch..II	visit_age_mo	visit_age_mo	-0.000732511	0.000732511	0.000317867	293	292	0.0219083	0.145372
PWY-O.4107..NAD.salvage.pathway.V..PNC.V.cycle.	symptoms	AP	0.00182521	0.00182521	0.000792362	293	247	0.0219626	0.145372
PWY-ZNC.1..assimilatory.sulfate.reduction.IV	mode_of_delivery	Vaginal	-0.00140803	0.00140803	0.000612559	293	273	0.0222439	0.146652
GLYCOCAT.PWY-.glycogen.degradation.I	symptoms	AP	-0.00201708	0.00201708	0.000878369	293	258	0.0223717	0.146913
PWY-7761..NAD.salvage.pathway.II..PNC.IV.cycle.	visit_age_mo	visit_age_mo	0.000524841	0.000524841	0.000229109	293	278	0.0226978	0.14847
PWY-7198..pyrimidine.deoxyribonucleotides.de.novo.biosynthesis.IV	mode_of_delivery	Vaginal	-0.00185669	0.00185669	0.000812231	293	247	0.0229858	0.149329
RHAMCAT.PWY-.L.rhamnose.degradation.I	mode_of_delivery	Vaginal	0.00154329	0.00154329	0.000675243	293	280	0.0230081	0.149329
PWY-5138..fatty.acid..beta..oxidation.IV..unsaturated..even.number.	mode_of_delivery	Vaginal	-0.00165502	0.00165502	0.000727662	293	245	0.0236752	0.153063
PWY-.1221..putrescine.degradation.II	probiotics_firstyr	probiotics_firstyr	-0.000221741	0.000221741	9.78408e-05	293	26	0.0241724	0.155674
PWY-.461..L.lysine.degradation.I	symptoms	AP	0.00109718	0.00109718	0.000484885	293	153	0.0243952	0.156504
PWY-6182..superpathway.of.salicylate.degradation	symptoms	AP	-0.000775725	0.000775725	0.000343067	293	56	0.0244963	0.156551
GLYCOLYSIS.TCA.GLYOX.BYPASS..superpathway.of.glycolysis..pyruvate.dehydrogenase..TCA..and.glyoxylate.bypass	mode_of_delivery	Vaginal	-0.00153408	0.00153408	0.000680724	293	178	0.0249729	0.158988
PWY-7388..octanoyl..acyl.carrier.protein..biosynthesis..mitochondria..yeast.	mode_of_delivery	Vaginal	-0.000840276	0.000840276	0.000373754	293	62	0.0253195	0.159973
PWY-7783..plasmalogen.degradation	visit_age_mo	visit_age_mo	0.000209876	0.000209876	9.33014e-05	293	46	0.0252398	0.159973
HEMESYN2.PWY-.heme.b.biosynthesis.II..oxygen.independent.	visit_age_mo	visit_age_mo	-0.000791161	0.000791161	0.000352451	293	284	0.025544	0.160445
PWY-3841..folate.transformations.II..plants.	mode_of_delivery	Vaginal	-0.00123715	0.00123715	0.000551295	293	293	0.0255866	0.160445
GLUCOSE1PMETAB.PWY-.glucose.and.glucose.1.phosphate.degradation	symptoms	AP	0.00211808	0.00211808	0.000948544	293	267	0.0263188	0.161713
GLYCOCAT.PWY-.glycogen.degradation.I	probiotics_firstyr	probiotics_firstyr	0.000962271	0.000962271	0.000431366	293	258	0.0264674	0.161713
GOLPDLCAT.PWY-.superpathway.of.glycerol.degradation.to.1.3.propanediol	symptoms	AP	-0.00147035	0.00147035	0.000656968	293	167	0.0259801	0.161713
NONMEVIPP.PWY-.methylerythritol.phosphate.pathway.I	visit_age_mo	visit_age_mo	0.000517009	0.000517009	0.000231681	293	292	0.0264138	0.161713
PWY-7165..L.ascorbate.biosynthesis.VIII..engineered.pathway.	mode_of_delivery	Vaginal	-0.000661799	0.000661799	0.000296047	293	29	0.0261539	0.161713
PWY-.1296..purine.ribonucleosides.degradation	visit_age_mo	visit_age_mo	-0.000785752	0.000785752	0.000351776	293	291	0.0262725	0.161713
PWY-6.430..myristate.biosynthesis..mitochondria.	mode_of_delivery	Vaginal	-0.000776193	0.000776193	0.000346891	293	56	0.0260138	0.161713
PWY-.41..allantoin.degradation.IV..anaerobic.	mode_of_delivery	Vaginal	0.000535068	0.000535068	0.000240185	293	101	0.0266708	0.162361
LPSSYN.PWY-.superpathway.of.lipopolysaccharide.biosynthesis	visit_age_mo	visit_age_mo	-0.00028541	0.00028541	0.000128515	293	40	0.0271404	0.162726
METHGLYUT.PWY-.superpathway.of.methylglyoxal.degradation	mode_of_delivery	Vaginal	-0.00104339	0.00104339	0.000469789	293	243	0.02713	0.162726
PWY-7883..anhydromuropeptides.recycling.II	probiotics_firstyr	probiotics_firstyr	0.000735625	0.000735625	0.000331049	293	256	0.027053	0.162726
PWY-O.4107..NAD.salvage.pathway.V..PNC.V.cycle.	mode_of_delivery	Vaginal	0.00161175	0.00161175	0.000726115	293	247	0.0272186	0.162726
SALVADEHYPOX.PWY-.adenosine.nucleotides.degradation.II	symptoms	AP	0.00283439	0.00283439	0.00127371	293	211	0.0268357	0.162726
PWY-6182..superpathway.of.salicylate.degradation	mode_of_delivery	Vaginal	-0.000696483	0.000696483	0.000314384	293	56	0.0275157	0.163915
PWY-8178..pentose.phosphate.pathway..non.oxidative.branch..II	symptoms	AP	0.0016922	0.0016922	0.000764543	293	292	0.0276578	0.164175
PWY-6731..starch.degradation.III	mode_of_delivery	Vaginal	0.00163449	0.00163449	0.000739737	293	222	0.0279227	0.16516
PWY-6.389..phytol.degradation	visit_age_mo	visit_age_mo	-0.000548751	0.000548751	0.000249321	293	195	0.0285308	0.16816
PWY-.1319..CDP.diacylglycerol.biosynthesis.II	visit_age_mo	visit_age_mo	-0.000718853	0.000718853	0.000328308	293	293	0.0293578	0.172426
X3.HYDROXYPHENYLACETATE.DEGRADATION.PWY-.4.hydroxyphenylacetate.degradation	symptoms	AP	-0.000852312	0.000852312	0.000389914	293	75	0.0296285	0.173405	3-HYDROXYPHENYLACETATE-DEGRADATION-PWY	Acetate
KDO.NAGLIPASYN.PWY-.superpathway.of..Kdo.2.lipid.A.biosynthesis	symptoms	AP	0.00115084	0.00115084	0.000528243	293	176	0.0301711	0.175453
PWY-.301..L.ascorbate.degradation.I..bacterial..anaerobic.	mode_of_delivery	Vaginal	-0.00178645	0.00178645	0.000820083	293	270	0.0301888	0.175453
PWY-8011..L.serine.biosynthesis.II	mode_of_delivery	Vaginal	-0.000243087	0.000243087	0.000111705	293	54	0.0303566	0.175815
PWY-7385..1.3.propanediol.biosynthesis..engineered.	symptoms	AP	0.000955893	0.000955893	0.000440824	293	91	0.030945	0.177987
PWY-8004..Entner.Doudoroff.pathway.I	symptoms	AP	0.00153074	0.00153074	0.000705816	293	276	0.0309197	0.177987
FOLSYN.PWY-.superpathway.of.tetrahydrofolate.biosynthesis.and.salvage	symptoms	AP	0.00164703	0.00164703	0.000762867	293	260	0.0316761	0.178066
PWY-5667..CDP.diacylglycerol.biosynthesis.I	symptoms	AP	0.00170493	0.00170493	0.000789824	293	293	0.031706	0.178066
PWY-5667..CDP.diacylglycerol.biosynthesis.I	visit_age_mo	visit_age_mo	-0.00071032	0.00071032	0.000328378	293	293	0.0313546	0.178066
PWY-6531..mannitol.cycle	probiotics_firstyr	probiotics_firstyr	-0.000853001	0.000853001	0.0003945	293	217	0.0314235	0.178066
PWY-7616..methanol.oxidation.to.carbon.dioxide	visit_age_mo	visit_age_mo	0.000105714	0.000105714	4.88837e-05	293	35	0.0313973	0.178066
PWY-922..mevalonate.pathway.I..eukaryotes.and.bacteria.	mode_of_delivery	Vaginal	-0.000833089	0.000833089	0.000385846	293	170	0.0316663	0.178066
THREOCAT.PWY-.superpathway.of.L.threonine.metabolism	visit_age_mo	visit_age_mo	0.000378841	0.000378841	0.000175309	293	65	0.0315204	0.178066
PWY-.1319..CDP.diacylglycerol.biosynthesis.II	symptoms	AP	0.00170079	0.00170079	0.000789657	293	293	0.0320829	0.179578
PWY-5130..2.oxobutanoate.degradation.I	mode_of_delivery	Vaginal	-0.00143672	0.00143672	0.000670428	293	150	0.0329514	0.183703
PWY-5910..superpathway.of.geranylgeranyldiphosphate.biosynthesis.I..via.mevalonate.	mode_of_delivery	Vaginal	-0.000804948	0.000804948	0.00037581	293	153	0.03304	0.183703
THISYN.PWY-.superpathway.of.thiamine.diphosphate.biosynthesis.I	probiotics_firstyr	probiotics_firstyr	-0.00078666	0.00078666	0.000367762	293	265	0.033273	0.184383
ALLANTOINDEG.PWY-.superpathway.of.allantoin.degradation.in.yeast	symptoms	AP	-0.000316416	0.000316416	0.000148045	293	34	0.0334158	0.184561
PWY-7783..plasmalogen.degradation	mode_of_delivery	Vaginal	-0.000439118	0.000439118	0.000205649	293	46	0.0335818	0.184866
PWY-6151..S.adenosyl.L.methionine.salvage.I	mode_of_delivery	Vaginal	-0.00135006	0.00135006	0.000633085	293	293	0.0338113	0.184967
PWY-G.0..mycothiol.biosynthesis	mode_of_delivery	Vaginal	0.000182491	0.000182491	8.5581e-05	293	29	0.0338219	0.184967
PWY-7254..TCA.cycle.VII..acetate.producers.	symptoms	AP	-0.000468005	0.000468005	0.000219873	293	62	0.0341419	0.186107	PWY-7254	Acetate
PWY-7200..superpathway.of.pyrimidine.deoxyribonucleoside.salvage	mode_of_delivery	Vaginal	-0.000892819	0.000892819	0.000420687	293	98	0.0346672	0.188355
PWY-5464..superpathway.of.cytosolic.glycolysis..plants...pyruvate.dehydrogenase.and.TCA.cycle	probiotics_firstyr	probiotics_firstyr	0.000197007	0.000197007	9.29125e-05	293	27	0.0348311	0.188631
HOMOSER.METSYN.PWY-.L.methionine.biosynthesis.I	mode_of_delivery	Vaginal	-0.00148632	0.00148632	0.000702934	293	274	0.0353356	0.190512
PWY-1042..glycolysis.IV	visit_age_mo	visit_age_mo	-0.000588775	0.000588775	0.000278889	293	292	0.0356218	0.190512
PWY-6612..superpathway.of.tetrahydrofolate.biosynthesis	symptoms	AP	0.00150111	0.00150111	0.000711538	293	260	0.0357496	0.190512
PWY-7184..pyrimidine.deoxyribonucleotides.de.novo.biosynthesis.I	visit_age_mo	visit_age_mo	0.000673081	0.000673081	0.000318499	293	262	0.0354361	0.190512
PWY-.881..superpathway.of.fatty.acid.biosynthesis.I..E..coli.	visit_age_mo	visit_age_mo	-0.000221093	0.000221093	0.000104761	293	32	0.0356811	0.190512
PWY-6859..all.trans.farnesol.biosynthesis	mode_of_delivery	Vaginal	-0.00105352	0.00105352	0.000500622	293	281	0.0362082	0.192341
ANAGLYCOLYSIS.PWY-.glycolysis.III..from.glucose.	visit_age_mo	visit_age_mo	-0.000433444	0.000433444	0.000206128	293	293	0.0363517	0.192491
PWY-6895..superpathway.of.thiamine.diphosphate.biosynthesis.II	probiotics_firstyr	probiotics_firstyr	-0.000882726	0.000882726	0.000421451	293	236	0.0370899	0.195778
P221.PWY-.octane.oxidation	symptoms	AP	-0.000851711	0.000851711	0.000407655	293	177	0.0375586	0.197627
PWY-FS.7..phosphatidylglycerol.biosynthesis.I..plastidic.	visit_age_mo	visit_age_mo	-0.00065935	0.00065935	0.000316293	293	288	0.0379848	0.199241
PWY-FS.8..phosphatidylglycerol.biosynthesis.II..non.plastidic.	visit_age_mo	visit_age_mo	-0.000656533	0.000656533	0.000316217	293	288	0.0387612	0.202676
PWY-7211..superpathway.of.pyrimidine.deoxyribonucleotides.de.novo.biosynthesis	symptoms	AP	-0.00157703	0.00157703	0.00076095	293	150	0.039113	0.203876
HEME.BIOSYNTHESIS.II.1..heme.b.biosynthesis.V..aerobic.	mode_of_delivery	Vaginal	-0.00150612	0.00150612	0.000727567	293	268	0.0393359	0.204399
PWY-7197..pyrimidine.deoxyribonucleotide.phosphorylation	probiotics_firstyr	probiotics_firstyr	0.000862735	0.000862735	0.000417819	293	292	0.0398319	0.206334
PWY-6293..superpathway.of.L.cysteine.biosynthesis..fungi.	visit_age_mo	visit_age_mo	-0.000373878	0.000373878	0.000181532	293	156	0.040338	0.208309
RIBOSYN2.PWY-.flavin.biosynthesis.I..bacteria.and.plants.	visit_age_mo	visit_age_mo	-0.000570294	0.000570294	0.000277352	293	290	0.0406631	0.20934
COLANSYN.PWY-.colanic.acid.building.blocks.biosynthesis	symptoms	AP	0.00166941	0.00166941	0.000814978	293	243	0.0414258	0.211445
PWY-5180..toluene.degradation.I..aerobic...via.o.cresol.	symptoms	AP	-0.00128573	0.00128573	0.000628132	293	88	0.0415741	0.211445
PWY-5415..catechol.degradation.I..meta.cleavage.pathway.	probiotics_firstyr	probiotics_firstyr	0.000287731	0.000287731	0.00014049	293	106	0.041461	0.211445
PWY-5971..palmitate.biosynthesis..type.II.fatty.acid.synthase.	symptoms	AP	0.00219032	0.00219032	0.00107009	293	243	0.0415791	0.211445
P42.PWY-.incomplete.reductive.TCA.cycle	mode_of_delivery	Vaginal	-0.00121426	0.00121426	0.00059569	293	225	0.0424214	0.215073
AEROBACTINSYN.PWY-.aerobactin.biosynthesis	symptoms	AP	0.000958177	0.000958177	0.00047174	293	52	0.0431573	0.216826
GLUDEG.I.PWY-.GABA.shunt	probiotics_firstyr	probiotics_firstyr	-0.000564308	0.000564308	0.000277736	293	154	0.0430903	0.216826
PANTO.PWY-.phosphopantothenate.biosynthesis.I	visit_age_mo	visit_age_mo	-0.000516975	0.000516975	0.000254459	293	293	0.0431057	0.216826
PWY-5028..L.histidine.degradation.II	probiotics_firstyr	probiotics_firstyr	0.000580102	0.000580102	0.0002861	293	94	0.04352	0.217992
PWY-922..mevalonate.pathway.I..eukaryotes.and.bacteria.	probiotics_firstyr	probiotics_firstyr	0.000418529	0.000418529	0.000206776	293	170	0.0438863	0.218514
PWY-6.391..fatty.acid..beta..oxidation.VI..mammalian.peroxisome.	mode_of_delivery	Vaginal	-0.000723149	0.000723149	0.000357179	293	109	0.0438298	0.218514
PWY-5189..tetrapyrrole.biosynthesis.II..from.glycine.	visit_age_mo	visit_age_mo	-0.000628417	0.000628417	0.00031067	293	266	0.0440199	0.218527
PWY-6922..L.N.delta..acetylornithine.biosynthesis	symptoms	AP	-0.000784411	0.000784411	0.000389073	293	113	0.0447179	0.221333
PROTOCATECHUATE.ORTHO.CLEAVAGE.PWY-.protocatechuate.degradation.II..ortho.cleavage.pathway.	visit_age_mo	visit_age_mo	0.000448484	0.000448484	0.00022283	293	102	0.0450793	0.221806
PWY-7238..sucrose.biosynthesis.II	mode_of_delivery	Vaginal	-0.00185406	0.00185406	0.000920881	293	291	0.0450074	0.221806
GLUCONEO.PWY-.gluconeogenesis.I	visit_age_mo	visit_age_mo	-0.000505574	0.000505574	0.000251715	293	287	0.0455218	0.223324
PWY-6992..1.5.anhydrofructose.degradation	visit_age_mo	visit_age_mo	-0.000383788	0.000383788	0.000191297	293	91	0.0457658	0.223863
PWY-7220..adenosine.deoxyribonucleotides.de.novo.biosynthesis.II	mode_of_delivery	Vaginal	-0.00160478	0.00160478	0.000802403	293	293	0.0464424	0.225848
PWY-7222..guanosine.deoxyribonucleotides.de.novo.biosynthesis.II	mode_of_delivery	Vaginal	-0.00160478	0.00160478	0.000802403	293	293	0.0464424	0.225848
GALACT.GLUCUROCAT.PWY-.superpathway.of.hexuronide.and.hexuronate.degradation	mode_of_delivery	Vaginal	0.00113932	0.00113932	0.000570835	293	156	0.0468882	0.227353
GALACT.GLUCUROCAT.PWY-.superpathway.of.hexuronide.and.hexuronate.degradation	probiotics_firstyr	probiotics_firstyr	-0.000609178	0.000609178	0.000305912	293	156	0.0473872	0.227528
GALACTITOLCAT.PWY-.galactitol.degradation	symptoms	AP	0.00182269	0.00182269	0.000915448	293	169	0.0474221	0.227528
PWY-6270..isoprene.biosynthesis.I	mode_of_delivery	Vaginal	0.00086882	0.00086882	0.000436462	293	291	0.0474699	0.227528
PWY-6606..guanosine.nucleotides.degradation.II	mode_of_delivery	Vaginal	-0.00156106	0.00156106	0.000782875	293	273	0.0470937	0.227528
PWY-5686..UMP.biosynthesis.I	mode_of_delivery	Vaginal	-0.00122562	0.00122562	0.000616789	293	293	0.0478586	0.228734
PWY-622..starch.biosynthesis	visit_age_mo	visit_age_mo	0.000857651	0.000857651	0.000432051	293	132	0.0480854	0.229161
P185.PWY-.formaldehyde.assimilation.III..dihydroxyacetone.cycle.	symptoms	AP	-0.00153277	0.00153277	0.000774259	293	187	0.0486942	0.230091
PWY-6121..5.aminoimidazole.ribonucleotide.biosynthesis.I	visit_age_mo	visit_age_mo	-0.000533167	0.000533167	0.000269121	293	293	0.0485261	0.230091
PWY-7115..C4.photosynthetic.carbon.assimilation.cycle..NAD.ME.type	mode_of_delivery	Vaginal	-0.00124525	0.00124525	0.000628869	293	277	0.0486385	0.230091
LIPA.CORESYN.PWY-.lipid.A.core.biosynthesis..E..coli.K.12.	mode_of_delivery	Vaginal	0.000439303	0.000439303	0.000222748	293	40	0.0495436	0.232785
PWY-7208..superpathway.of.pyrimidine.nucleobases.salvage	probiotics_firstyr	probiotics_firstyr	0.000846796	0.000846796	0.000429319	293	292	0.0495186	0.232785
METSYN.PWY-.superpathway.of.L.homoserine.and.L.methionine.biosynthesis	mode_of_delivery	Vaginal	-0.00150096	0.00150096	0.000763425	293	274	0.0502482	0.232889
P122.PWY-.heterolactic.fermentation	probiotics_firstyr	probiotics_firstyr	0.000625269	0.000625269	0.000317946	293	239	0.0501906	0.232889	P122-PWY	SCFA
PWY-6876..isopropanol.biosynthesis..engineered.	mode_of_delivery	Vaginal	-0.000337765	0.000337765	0.000171646	293	20	0.0500501	0.232889
PWY-7013...S..propane.1.2.diol.degradation	visit_age_mo	visit_age_mo	0.000947725	0.000947725	0.000482068	293	178	0.0502638	0.232889	PWY-7013	SCFA
PWY-7807..glyphosate.degradation.III	probiotics_firstyr	probiotics_firstyr	-0.000363623	0.000363623	0.000184875	293	58	0.0501587	0.232889
CARNMET.PWY-.L.carnitine.degradation.I	symptoms	AP	0.000918279	0.000918279	0.000468409	293	160	0.0509103	0.233117
NONOXIPENT.PWY-.pentose.phosphate.pathway..non.oxidative.branch..I	visit_age_mo	visit_age_mo	-0.000675314	0.000675314	0.000344276	293	292	0.050778	0.233117
PWY-6470..peptidoglycan.biosynthesis.V...beta..lactam.resistance.	mode_of_delivery	Vaginal	0.000819377	0.000819377	0.000417712	293	68	0.0507739	0.233117
PWY-6527..stachyose.degradation	symptoms	AP	0.00140671	0.00140671	0.000716436	293	284	0.0505516	0.233117
PWY-7268..cytosolic.NADPH.production..yeast.	probiotics_firstyr	probiotics_firstyr	-0.000353063	0.000353063	0.000180175	293	37	0.0510119	0.233117
PWY-2942..L.lysine.biosynthesis.III	symptoms	AP	-0.00200315	0.00200315	0.00102469	293	256	0.0515642	0.234998
CENTFERM.PWY-.pyruvate.fermentation.to.butanoate	mode_of_delivery	Vaginal	-0.000652372	0.000652372	0.000335194	293	73	0.0525968	0.237518	CENTFERM-PWY	SCFA
PWY-6608..guanosine.nucleotides.degradation.III	mode_of_delivery	Vaginal	-0.00175209	0.00175209	0.000900584	293	283	0.0526869	0.237518
PWY-6612..superpathway.of.tetrahydrofolate.biosynthesis	probiotics_firstyr	probiotics_firstyr	-0.000679846	0.000679846	0.000349435	293	260	0.0526806	0.237518
PWY-8187..L.arginine.degradation.XIII..reductive.Stickland.reaction.	visit_age_mo	visit_age_mo	-0.000628587	0.000628587	0.000322736	293	290	0.0524244	0.237518
THRESYN.PWY-.superpathway.of.L.threonine.biosynthesis	symptoms	AP	0.00116734	0.00116734	0.000601011	293	293	0.0530767	0.23863
PWY-2941..L.lysine.biosynthesis.II	visit_age_mo	visit_age_mo	-0.000606015	0.000606015	0.000312534	293	290	0.0534732	0.239438
PWY-7237..myo...chiro..and.scyllo.inositol.degradation	mode_of_delivery	Vaginal	-0.00234058	0.00234058	0.00120752	293	164	0.0535595	0.239438
PYRIDNUCSAL.PWY-.NAD.salvage.pathway.I..PNC.VI.cycle.	probiotics_firstyr	probiotics_firstyr	-0.000605044	0.000605044	0.000312314	293	242	0.0536869	0.239438
PWY-LZ.257..superpathway.of.fermentation..Chlamydomonas.reinhardtii.	symptoms	AP	-0.00158802	0.00158802	0.000820274	293	236	0.0538498	0.239524
PWY-801..homocysteine.and.cysteine.interconversion	mode_of_delivery	Vaginal	-0.000821256	0.000821256	0.000425044	293	172	0.0543196	0.240971
PWY-7391..isoprene.biosynthesis.II..engineered.	probiotics_firstyr	probiotics_firstyr	0.000315604	0.000315604	0.000163671	293	101	0.0548021	0.242466
PWY-5656..mannosylglycerate.biosynthesis.I	probiotics_firstyr	probiotics_firstyr	-0.000697597	0.000697597	0.000362208	293	156	0.0550939	0.242793
PWY-6.409..superpathway.of.purine.nucleotide.salvage	probiotics_firstyr	probiotics_firstyr	0.000707445	0.000707445	0.000367654	293	284	0.0553127	0.242793
VALSYN.PWY-.L.valine.biosynthesis	symptoms	AP	0.0013021	0.0013021	0.000676489	293	293	0.0552405	0.242793
GLYCOGENSYNTH.PWY-.glycogen.biosynthesis.I..from.ADP.D.Glucose.	mode_of_delivery	Vaginal	-0.00111089	0.00111089	0.000579917	293	293	0.0564053	0.24565
PWY-6123..inosine.5..phosphate.biosynthesis.I	mode_of_delivery	Vaginal	-0.00103049	0.00103049	0.000537568	293	293	0.0562346	0.24565
SER.GLYSYN.PWY-.superpathway.of.L.serine.and.glycine.biosynthesis.I	symptoms	AP	0.00108521	0.00108521	0.000566283	293	290	0.0563064	0.24565
FOLSYN.PWY-.superpathway.of.tetrahydrofolate.biosynthesis.and.salvage	mode_of_delivery	Vaginal	-0.00133682	0.00133682	0.000699086	293	260	0.0568372	0.246245
PWY-5994..palmitate.biosynthesis..type.I.fatty.acid.synthase.	visit_age_mo	visit_age_mo	0.000258603	0.000258603	0.000135212	293	40	0.0567936	0.246245
PENTOSE.P.PWY-.pentose.phosphate.pathway	probiotics_firstyr	probiotics_firstyr	-0.00058259	0.00058259	0.000305259	293	292	0.0573195	0.247692

## Sheet: Last Pre-symptomatic
feature	metadata	value	coef	absolute coef	stderr	N	N.not.0	pval	qval	Pathway.ID	SCFA-association
PWY-7165..L.ascorbate.biosynthesis.VIII..engineered.pathway.	visit_age_mo	visit_age_mo	0.00135864	0.00135864	0.000204409	130	12	8.32272e-10	1.40155e-06
THREOCAT.PWY-.superpathway.of.L.threonine.metabolism	visit_age_mo	visit_age_mo	0.00166248	0.00166248	0.00027422	130	28	1.46811e-08	1.23615e-05
X3.HYDROXYPHENYLACETATE.DEGRADATION.PWY-.4.hydroxyphenylacetate.degradation	visit_age_mo	visit_age_mo	0.00145938	0.00145938	0.000263419	130	32	1.70717e-07	7.18718e-05	3-HYDROXYPHENYLACETATE-DEGRADATION-PWY	Acetate
PWY-5981..CDP.diacylglycerol.biosynthesis.III	mode_of_delivery	Vaginal	-0.0049921	0.0049921	0.000896397	130	126	1.49492e-07	7.18718e-05
PROTOCATECHUATE.ORTHO.CLEAVAGE.PWY-.protocatechuate.degradation.II..ortho.cleavage.pathway.	visit_age_mo	visit_age_mo	0.00179252	0.00179252	0.000367193	130	42	3.14457e-06	0.00105909
PWY-6182..superpathway.of.salicylate.degradation	visit_age_mo	visit_age_mo	0.00106265	0.00106265	0.000222625	130	20	4.97295e-06	0.00139574
GOLPDLCAT.PWY-.superpathway.of.glycerol.degradation.to.1.3.propanediol	visit_age_mo	visit_age_mo	0.00208277	0.00208277	0.000439908	130	68	5.84902e-06	0.00140711
PWY-7268..cytosolic.NADPH.production..yeast.	visit_age_mo	visit_age_mo	0.00108173	0.00108173	0.000235331	130	17	1.03529e-05	0.00217928
GLUDEG.I.PWY-.GABA.shunt	mode_of_delivery	Vaginal	0.00342033	0.00342033	0.000751627	130	66	1.24984e-05	0.00233859
PWY-7237..myo...chiro..and.scyllo.inositol.degradation	visit_age_mo	visit_age_mo	0.00355297	0.00355297	0.000790607	130	61	1.57258e-05	0.00264822
PWY-7245..superpathway.of.NAD.NADP...NADH.NADPH.interconversion..yeast.	visit_age_mo	visit_age_mo	0.00074249	0.00074249	0.000169729	130	14	2.53804e-05	0.0038855
UNINTEGRATED	mode_of_delivery	Vaginal	0.0569335	0.0569335	0.0133323	130	130	3.82714e-05	0.00537075
PWY-7211..superpathway.of.pyrimidine.deoxyribonucleotides.de.novo.biosynthesis	visit_age_mo	visit_age_mo	0.0019897	0.0019897	0.000468257	130	60	4.15727e-05	0.00538527
P185.PWY-.formaldehyde.assimilation.III..dihydroxyacetone.cycle.	visit_age_mo	visit_age_mo	0.00205433	0.00205433	0.000492428	130	73	5.60935e-05	0.00674725
PWY-6545..pyrimidine.deoxyribonucleotides.de.novo.biosynthesis.III	visit_age_mo	visit_age_mo	0.0017028	0.0017028	0.000414249	130	81	7.09377e-05	0.00787258
PWY-7456...beta...1.4..mannan.degradation	mode_of_delivery	Vaginal	0.00325949	0.00325949	0.000795646	130	45	7.47989e-05	0.00787258
PYRIDNUCSYN.PWY-.NAD.de.novo.biosynthesis.I..from.aspartate.	mode_of_delivery	Vaginal	0.00384578	0.00384578	0.000947941	130	123	8.69405e-05	0.00861222
PWY-8131..5..deoxyadenosine.degradation.II	visit_age_mo	visit_age_mo	0.00182683	0.00182683	0.000452693	130	89	9.42883e-05	0.0088212
ARGININE.SYN4.PWY-.L.ornithine.biosynthesis.II	mode_of_delivery	Vaginal	0.0041177	0.0041177	0.00103265	130	126	0.000112873	0.0100041
PWY-5417..catechol.degradation.III..ortho.cleavage.pathway.	visit_age_mo	visit_age_mo	0.00115107	0.00115107	0.000291529	130	28	0.00013058	0.0104713
PWY-5431..aromatic.compounds.degradation.via..beta..ketoadipate	visit_age_mo	visit_age_mo	0.00115107	0.00115107	0.000291529	130	28	0.00013058	0.0104713
PPGPPMET.PWY-.ppGpp.metabolism	mode_of_delivery	Vaginal	-0.00419282	0.00419282	0.00106553	130	118	0.000137234	0.0105046
COLANSYN.PWY-.colanic.acid.building.blocks.biosynthesis	mode_of_delivery	Vaginal	0.00444676	0.00444676	0.00113612	130	105	0.00014829	0.0108574
PWY-4984..urea.cycle	mode_of_delivery	Vaginal	0.00381733	0.00381733	0.000978363	130	81	0.000155133	0.0108851
PWY-7942..5.oxo.L.proline.metabolism	visit_age_mo	visit_age_mo	0.00168524	0.00168524	0.000433794	130	103	0.000165059	0.0111184
PWY-7013...S..propane.1.2.diol.degradation	visit_age_mo	visit_age_mo	0.00308708	0.00308708	0.000797895	130	81	0.000174933	0.0113303	PWY-7013	SCFA
PWY-7269..mitochondrial.NADPH.production..yeast.	visit_age_mo	visit_age_mo	0.00134057	0.00134057	0.000348518	130	63	0.000189947	0.0118471
PWY-5104..L.isoleucine.biosynthesis.IV	mode_of_delivery	Vaginal	0.00255513	0.00255513	0.000670384	130	37	0.000215742	0.0129754
PWY-6185..4.methylcatechol.degradation..ortho.cleavage.	visit_age_mo	visit_age_mo	0.00120744	0.00120744	0.000318178	130	32	0.000229073	0.0133021
CATECHOL.ORTHO.CLEAVAGE.PWY-.catechol.degradation.to..beta..ketoadipate	visit_age_mo	visit_age_mo	0.000996269	0.000996269	0.000263527	130	28	0.00024123	0.0135411
DTDPRHAMSYN.PWY-.dTDP..beta..L.rhamnose.biosynthesis	mode_of_delivery	Vaginal	0.00482499	0.00482499	0.00128824	130	129	0.000273641	0.0148649
PWY-6922..L.N.delta..acetylornithine.biosynthesis	visit_age_mo	visit_age_mo	0.000959464	0.000959464	0.000259043	130	62	0.000317312	0.0166985
AST.PWY-.L.arginine.degradation.II..AST.pathway.	visit_age_mo	visit_age_mo	0.00158796	0.00158796	0.000432029	130	106	0.000350776	0.0171502
PWY-5030..L.histidine.degradation.III	mode_of_delivery	Vaginal	0.00393509	0.00393509	0.00107152	130	74	0.000354672	0.0171502
PWY-822..fructan.biosynthesis	mode_of_delivery	Vaginal	-0.00293829	0.00293829	0.000800398	130	84	0.000356447	0.0171502
PWY-6823..molybdopterin.biosynthesis	mode_of_delivery	Vaginal	-0.00407961	0.00407961	0.00111751	130	129	0.000383036	0.0179176
PWY-1042..glycolysis.IV	mode_of_delivery	Vaginal	-0.00313439	0.00313439	0.000866774	130	129	0.000432192	0.0196706
PWY-7323..superpathway.of.GDP.mannose.derived.O.antigen.building.blocks.biosynthesis	mode_of_delivery	Vaginal	0.00383918	0.00383918	0.0010682	130	106	0.000466803	0.0206867
PWY-7200..superpathway.of.pyrimidine.deoxyribonucleoside.salvage	visit_age_mo	visit_age_mo	-0.00126003	0.00126003	0.000356697	130	60	0.000577505	0.0249364
GLUCUROCAT.PWY-.superpathway.of..beta..D.glucuronosides.degradation	mode_of_delivery	Vaginal	0.00354678	0.00354678	0.00101066	130	95	0.000625174	0.0260291
PWY-6630..superpathway.of.L.tyrosine.biosynthesis	mode_of_delivery	Vaginal	-0.00350501	0.00350501	0.000999895	130	126	0.000633726	0.0260291
PWY-2941..L.lysine.biosynthesis.II	mode_of_delivery	Vaginal	-0.0035716	0.0035716	0.00104008	130	130	0.000807478	0.032376
P105.PWY-.TCA.cycle.IV..2.oxoglutarate.decarboxylase.	visit_age_mo	visit_age_mo	0.00184717	0.00184717	0.000540694	130	91	0.000856935	0.0335599
PWY-5690..TCA.cycle.II..plants.and.fungi.	visit_age_mo	visit_age_mo	0.000495284	0.000495284	0.000146573	130	16	0.00097041	0.0367092
UDPNAGSYN.PWY-.UDP.N.acetyl.D.glucosamine.biosynthesis.I	mode_of_delivery	Vaginal	-0.00385793	0.00385793	0.0011428	130	130	0.000980947	0.0367092
PWY-.1241..ADP.L.glycero..beta..D.manno.heptose.biosynthesis	mode_of_delivery	Vaginal	-0.00391239	0.00391239	0.00116221	130	122	0.00101246	0.0370647
HEMESYN2.PWY-.heme.b.biosynthesis.II..oxygen.independent.	mode_of_delivery	Vaginal	-0.0039598	0.0039598	0.00118574	130	125	0.00110655	0.0387838
PWY-7209..superpathway.of.pyrimidine.ribonucleosides.degradation	mode_of_delivery	Vaginal	0.00205856	0.00205856	0.000617403	130	62	0.00112599	0.0387838
PWY-.1297..superpathway.of.purine.deoxyribonucleosides.degradation	mode_of_delivery	Vaginal	-0.00307888	0.00307888	0.000923602	130	129	0.00112851	0.0387838
CITRULBIO.PWY-.L.citrulline.biosynthesis	mode_of_delivery	Vaginal	0.0033591	0.0033591	0.00101752	130	125	0.00125484	0.0422631
UNMAPPED	mode_of_delivery	Vaginal	-0.0520651	0.0520651	0.0159202	130	130	0.00138802	0.0441023
PWY-5464..superpathway.of.cytosolic.glycolysis..plants...pyruvate.dehydrogenase.and.TCA.cycle	visit_age_mo	visit_age_mo	0.000433951	0.000433951	0.000132254	130	11	0.00133999	0.0441023
TRPSYN.PWY-.L.tryptophan.biosynthesis	mode_of_delivery	Vaginal	-0.00328637	0.00328637	0.00100373	130	129	0.00137107	0.0441023
LPSSYN.PWY-.superpathway.of.lipopolysaccharide.biosynthesis	mode_of_delivery	Vaginal	0.00152772	0.00152772	0.000469781	130	21	0.00147346	0.04595
PWY-6629..superpathway.of.L.tryptophan.biosynthesis	mode_of_delivery	Vaginal	-0.00257373	0.00257373	0.000795104	130	129	0.0015468	0.0473603
PRPP.PWY-.superpathway.of.histidine..purine..and.pyrimidine.biosynthesis	visit_age_mo	visit_age_mo	0.00163888	0.00163888	0.00050818	130	104	0.00160773	0.0478986
PWY-5005..biotin.biosynthesis.II	mode_of_delivery	Vaginal	-0.00397865	0.00397865	0.00123881	130	89	0.00167816	0.0478986
PWY-702..L.methionine.biosynthesis.II	mode_of_delivery	Vaginal	-0.00365321	0.00365321	0.00113619	130	129	0.00165859	0.0478986
PWY-.166..superpathway.of.pyrimidine.deoxyribonucleotides.de.novo.biosynthesis..E..coli.	visit_age_mo	visit_age_mo	0.00144404	0.00144404	0.000449566	130	111	0.00167591	0.0478986
PWY-7197..pyrimidine.deoxyribonucleotide.phosphorylation	mode_of_delivery	Vaginal	-0.00408419	0.00408419	0.00127726	130	130	0.00175551	0.0482165
PWY-.1296..purine.ribonucleosides.degradation	mode_of_delivery	Vaginal	-0.00360312	0.00360312	0.00112981	130	129	0.00180382	0.0482165
TCA..TCA.cycle.I..prokaryotic.	visit_age_mo	visit_age_mo	0.00195077	0.00195077	0.000609765	130	100	0.0017465	0.0482165
URSIN.PWY-.ureide.biosynthesis	visit_age_mo	visit_age_mo	0.00043584	0.00043584	0.000136622	130	7	0.00179819	0.0482165
PWY-6168..flavin.biosynthesis.III..fungi.	mode_of_delivery	Vaginal	0.00352864	0.00352864	0.00112184	130	70	0.00207299	0.052517
PWY-7208..superpathway.of.pyrimidine.nucleobases.salvage	mode_of_delivery	Vaginal	-0.00410487	0.00410487	0.00130608	130	130	0.00208945	0.052517
PWY-7210..pyrimidine.deoxyribonucleotides.biosynthesis.from.CTP	mode_of_delivery	Vaginal	-0.0035681	0.0035681	0.00113287	130	69	0.00204555	0.052517
REDCITCYC..TCA.cycle.VI..Helicobacter.	visit_age_mo	visit_age_mo	0.00121428	0.00121428	0.000386266	130	82	0.00208455	0.052517
LIPA.CORESYN.PWY-.lipid.A.core.biosynthesis..E..coli.K.12.	mode_of_delivery	Vaginal	0.00120675	0.00120675	0.000385755	130	21	0.00218816	0.0541891
P23.PWY-.reductive.TCA.cycle.I	visit_age_mo	visit_age_mo	-0.000655048	0.000655048	0.000211426	130	51	0.00240481	0.0586913
ALLANTOINDEG.PWY-.superpathway.of.allantoin.degradation.in.yeast	visit_age_mo	visit_age_mo	0.000266593	0.000266593	8.6277e-05	130	13	0.00246781	0.0592101
PWY-6292..superpathway.of.L.cysteine.biosynthesis..mammalian.	visit_age_mo	visit_age_mo	0.00107638	0.00107638	0.000348764	130	97	0.00249639	0.0592101
PWY-4984..urea.cycle	visit_age_mo	visit_age_mo	0.00140266	0.00140266	0.000459051	130	81	0.00274672	0.0636604
PWY-6731..starch.degradation.III	mode_of_delivery	Vaginal	0.00325245	0.00325245	0.00106496	130	97	0.00275963	0.0636604
PWY-6531..mannitol.cycle	visit_age_mo	visit_age_mo	0.00160399	0.00160399	0.000527003	130	97	0.00285033	0.0648642
HEME.BIOSYNTHESIS.II..heme.b.biosynthesis.I..aerobic.	mode_of_delivery	Vaginal	-0.0033504	0.0033504	0.00110971	130	125	0.00307336	0.0680991
P122.PWY-.heterolactic.fermentation	visit_age_mo	visit_age_mo	0.00121484	0.00121484	0.000402137	130	111	0.00305636	0.0680991	P122-PWY	SCFA
ARG.POLYAMINE.SYN..superpathway.of.arginine.and.polyamine.biosynthesis	visit_age_mo	visit_age_mo	0.00168636	0.00168636	0.000559838	130	107	0.00313946	0.0686603
PWY-8011..L.serine.biosynthesis.II	visit_age_mo	visit_age_mo	-0.000271441	0.000271441	9.17614e-05	130	39	0.00370267	0.0791246
TCA.GLYOX.BYPASS..superpathway.of.glyoxylate.bypass.and.TCA	visit_age_mo	visit_age_mo	0.00182327	0.00182327	0.000616535	130	96	0.0037119	0.0791246
PWY-561..superpathway.of.glyoxylate.cycle.and.fatty.acid.degradation	visit_age_mo	visit_age_mo	0.00177045	0.00177045	0.000600199	130	96	0.00379728	0.0799327
GALACT.GLUCUROCAT.PWY-.superpathway.of.hexuronide.and.hexuronate.degradation	mode_of_delivery	Vaginal	0.00254091	0.00254091	0.00086634	130	70	0.00399534	0.0810621
P108.PWY-.pyruvate.fermentation.to.propanoate.I	visit_age_mo	visit_age_mo	0.00115774	0.00115774	0.00039447	130	70	0.00397126	0.0810621	P108-PWY	SCFA
PWY-6969..TCA.cycle.V..2.oxoglutarate.synthase.	visit_age_mo	visit_age_mo	0.00144971	0.00144971	0.000493881	130	120	0.00396635	0.0810621
P108.PWY-.pyruvate.fermentation.to.propanoate.I	symptoms	AP	-0.00281657	0.00281657	0.00096315	130	70	0.00409989	0.0821931	P108-PWY	SCFA
PWY-.41..allantoin.degradation.IV..anaerobic.	mode_of_delivery	Vaginal	0.00112273	0.00112273	0.000384532	130	48	0.004157	0.0823576
PWY-3001..superpathway.of.L.isoleucine.biosynthesis.I	mode_of_delivery	Vaginal	-0.00225551	0.00225551	0.000775337	130	130	0.0042919	0.0827837
PWY-4361..S.methyl.5.thio..alpha..D.ribose.1.phosphate.degradation.I	visit_age_mo	visit_age_mo	0.000187466	0.000187466	6.45007e-05	130	7	0.00432599	0.0827837
PWY-7229..superpathway.of.adenosine.nucleotides.de.novo.biosynthesis.I	mode_of_delivery	Vaginal	-0.00342223	0.00342223	0.00117445	130	130	0.00423014	0.0827837
FOLSYN.PWY-.superpathway.of.tetrahydrofolate.biosynthesis.and.salvage	symptoms	AP	0.00360974	0.00360974	0.00124564	130	115	0.00443755	0.0839644
PWY-6936..seleno.amino.acid.biosynthesis..plants.	mode_of_delivery	Vaginal	-0.00328306	0.00328306	0.00114486	130	130	0.00485518	0.0908459
PWY-7184..pyrimidine.deoxyribonucleotides.de.novo.biosynthesis.I	visit_age_mo	visit_age_mo	0.00133796	0.00133796	0.00046807	130	113	0.00498912	0.0923262
PWY-5154..L.arginine.biosynthesis.III..via.N.acetyl.L.citrulline.	visit_age_mo	visit_age_mo	0.00108553	0.00108553	0.00038165	130	128	0.00520191	0.0931917
PWY-6126..superpathway.of.adenosine.nucleotides.de.novo.biosynthesis.II	mode_of_delivery	Vaginal	-0.00345893	0.00345893	0.00121536	130	130	0.00517564	0.0931917
PWY-6612..superpathway.of.tetrahydrofolate.biosynthesis	symptoms	AP	0.00336017	0.00336017	0.00117883	130	115	0.00510878	0.0931917
PWY-7315..dTDP.N.acetylthomosamine.biosynthesis	visit_age_mo	visit_age_mo	0.00123276	0.00123276	0.000434459	130	108	0.00530768	0.0940857
POLYAMSYN.PWY-.superpathway.of.polyamine.biosynthesis.I	visit_age_mo	visit_age_mo	0.00151087	0.00151087	0.000535786	130	107	0.00558781	0.0980196
COMPLETE.ARO.PWY-.superpathway.of.aromatic.amino.acid.biosynthesis	mode_of_delivery	Vaginal	-0.00198773	0.00198773	0.000711889	130	130	0.00605837	0.104105
THISYNARA.PWY-.superpathway.of.thiamine.diphosphate.biosynthesis.III..eukaryotes.	symptoms	AP	0.00288496	0.00288496	0.00103216	130	127	0.00600795	0.104105
POLYAMINSYN3.PWY-.superpathway.of.polyamine.biosynthesis.II	probiotics_firstyr	probiotics_firstyr	-0.000319062	0.000319062	0.000114681	130	8	0.00623706	0.106093
PWY-5188..tetrapyrrole.biosynthesis.I..from.glutamate.	mode_of_delivery	Vaginal	-0.00320262	0.00320262	0.00115926	130	126	0.00659985	0.111142
GLYOXYLATE.BYPASS..glyoxylate.cycle	visit_age_mo	visit_age_mo	0.00149916	0.00149916	0.000543344	130	105	0.00666677	0.111157
PWY-7185..UTP.and.CTP.dephosphorylation.I	mode_of_delivery	Vaginal	-0.00341144	0.00341144	0.00123931	130	69	0.0067916	0.112128
PWY-6876..isopropanol.biosynthesis..engineered.	probiotics_firstyr	probiotics_firstyr	0.000366597	0.000366597	0.000134791	130	11	0.00746375	0.122029
P161.PWY-.acetylene.degradation..anaerobic.	visit_age_mo	visit_age_mo	0.00138287	0.00138287	0.000509341	130	124	0.00756499	0.122495	P161-PWY	SCFA
VALSYN.PWY-.L.valine.biosynthesis	visit_age_mo	visit_age_mo	-0.00109104	0.00109104	0.000402661	130	130	0.00768286	0.123218
PWY-5837..2.carboxy.1.4.naphthoquinol.biosynthesis	mode_of_delivery	Vaginal	-0.0029203	0.0029203	0.00108834	130	126	0.00827809	0.131512
P125.PWY-.superpathway.of..R.R..butanediol.biosynthesis	mode_of_delivery	Vaginal	-0.00226522	0.00226522	0.000847695	130	92	0.0085397	0.134401
PWY-5667..CDP.diacylglycerol.biosynthesis.I	symptoms	AP	0.00293558	0.00293558	0.00110589	130	130	0.00897549	0.137212
PWY-.1261..anhydromuropeptides.recycling.I	mode_of_delivery	Vaginal	-0.00259234	0.00259234	0.000977585	130	121	0.00904425	0.137212
PWY-.1277..3.phenylpropanoate.and.3..3.hydroxyphenyl.propanoate.degradation	visit_age_mo	visit_age_mo	0.00130055	0.00130055	0.000488733	130	60	0.00881189	0.137212
PWY-.1319..CDP.diacylglycerol.biosynthesis.II	symptoms	AP	0.00293324	0.00293324	0.00110478	130	130	0.00896207	0.137212
P221.PWY-.octane.oxidation	visit_age_mo	visit_age_mo	0.000741963	0.000741963	0.000281241	130	89	0.0093948	0.141258
PWY-7220..adenosine.deoxyribonucleotides.de.novo.biosynthesis.II	mode_of_delivery	Vaginal	-0.00335702	0.00335702	0.00127955	130	130	0.00978422	0.144532
PWY-7222..guanosine.deoxyribonucleotides.de.novo.biosynthesis.II	mode_of_delivery	Vaginal	-0.00335702	0.00335702	0.00127955	130	130	0.00978422	0.144532
PWY-7616..methanol.oxidation.to.carbon.dioxide	visit_age_mo	visit_age_mo	0.000204465	0.000204465	7.80406e-05	130	15	0.00988264	0.144716
PWY-822..fructan.biosynthesis	visit_age_mo	visit_age_mo	-0.000981172	0.000981172	0.000375549	130	84	0.0100863	0.146425
ECASYN.PWY-.enterobacterial.common.antigen.biosynthesis	visit_age_mo	visit_age_mo	0.00111172	0.00111172	0.000427517	130	92	0.0104334	0.148373
PWY-7345..superpathway.of.anaerobic.sucrose.degradation	visit_age_mo	visit_age_mo	0.00117216	0.00117216	0.000450073	130	126	0.0103195	0.148373
PYRIDNUCSAL.PWY-.NAD.salvage.pathway.I..PNC.VI.cycle.	visit_age_mo	visit_age_mo	0.00101163	0.00101163	0.000389546	130	107	0.0105336	0.148373
VALSYN.PWY-.L.valine.biosynthesis	mode_of_delivery	Vaginal	-0.00222748	0.00222748	0.00085818	130	130	0.0105729	0.148373
PWY-5345..superpathway.of.L.methionine.biosynthesis..by.sulfhydrylation.	visit_age_mo	visit_age_mo	0.00108066	0.00108066	0.000417177	130	123	0.0107249	0.149263
PWY-7883..anhydromuropeptides.recycling.II	mode_of_delivery	Vaginal	-0.00241969	0.00241969	0.000937985	130	112	0.0110465	0.152479
GLUCARDEG.PWY-.D.glucarate.degradation.I	visit_age_mo	visit_age_mo	0.00133368	0.00133368	0.000520703	130	108	0.0116161	0.159037
PWY-7357..thiamine.phosphate.formation.from.pyrithiamine.and.oxythiamine..yeast.	mode_of_delivery	Vaginal	-0.00174942	0.00174942	0.000685161	130	130	0.011873	0.161243
ARGDEG.PWY-.superpathway.of.L.arginine..putrescine..and.4.aminobutanoate.degradation	visit_age_mo	visit_age_mo	0.000687162	0.000687162	0.000271572	130	17	0.012638	0.162925
ORNARGDEG.PWY-.superpathway.of.L.arginine.and.L.ornithine.degradation	visit_age_mo	visit_age_mo	0.000687162	0.000687162	0.000271572	130	17	0.012638	0.162925
P42.PWY-.incomplete.reductive.TCA.cycle	mode_of_delivery	Vaginal	-0.0022275	0.0022275	0.000877644	130	107	0.0123757	0.162925
PENTOSE.P.PWY-.pentose.phosphate.pathway	symptoms	AP	0.00248254	0.00248254	0.000981528	130	129	0.0126741	0.162925
PWY-3801..sucrose.degradation.II..sucrose.synthase.	visit_age_mo	visit_age_mo	0.000627835	0.000627835	0.000247845	130	16	0.0125405	0.162925
PWY-5138..fatty.acid..beta..oxidation.IV..unsaturated..even.number.	visit_age_mo	visit_age_mo	0.00126691	0.00126691	0.00049833	130	107	0.0122335	0.162925
PWY-6628..superpathway.of.L.phenylalanine.biosynthesis	mode_of_delivery	Vaginal	-0.00216548	0.00216548	0.000851929	130	129	0.0122486	0.162925
ARO.PWY-.chorismate.biosynthesis.I	mode_of_delivery	Vaginal	-0.00211803	0.00211803	0.000842711	130	130	0.0132307	0.166685
NAD.BIOSYNTHESIS.II..NAD.salvage.pathway.III..to.nicotinamide.riboside.	mode_of_delivery	Vaginal	-0.00202226	0.00202226	0.00080436	130	117	0.0132032	0.166685
POLYAMINSYN3.PWY-.superpathway.of.polyamine.biosynthesis.II	symptoms	AP	0.000572996	0.000572996	0.000228064	130	8	0.0132635	0.166685
PWY-6185..4.methylcatechol.degradation..ortho.cleavage.	symptoms	AP	-0.00194591	0.00194591	0.000776873	130	32	0.0135387	0.168883
PWY-8178..pentose.phosphate.pathway..non.oxidative.branch..II	mode_of_delivery	Vaginal	-0.00257082	0.00257082	0.00102943	130	129	0.0138134	0.169794
PWY-.1221..putrescine.degradation.II	mode_of_delivery	Vaginal	0.000882538	0.000882538	0.000353098	130	17	0.0137361	0.169794
HCAMHPDEG.PWY-.3.phenylpropanoate.and.3..3.hydroxyphenyl.propanoate.degradation.to.2.hydroxypentadienoate	visit_age_mo	visit_age_mo	0.00114706	0.00114706	0.000461405	130	60	0.0142383	0.172498	HCAMHPDEG-PWY	Propiote
PWY-6690..cinnamate.and.3.hydroxycinnamate.degradation.to.2.hydroxypentadienoate	visit_age_mo	visit_age_mo	0.00114706	0.00114706	0.000461405	130	60	0.0142383	0.172498
COBALSYN.PWY-.superpathway.of.adenosylcobalamin.salvage.from.cobinamide.I	visit_age_mo	visit_age_mo	0.00119759	0.00119759	0.000482476	130	117	0.0143849	0.17303
ILEUSYN.PWY-.L.isoleucine.biosynthesis.I..from.threonine.	visit_age_mo	visit_age_mo	-0.00103033	0.00103033	0.000415671	130	130	0.0145187	0.173401
PWY-5103..L.isoleucine.biosynthesis.III	visit_age_mo	visit_age_mo	-0.00100323	0.00100323	0.000406976	130	130	0.0150557	0.176496
PWY-5656..mannosylglycerate.biosynthesis.I	mode_of_delivery	Vaginal	0.00267893	0.00267893	0.00108716	130	70	0.0150923	0.176496
PWY-ZNC.1..assimilatory.sulfate.reduction.IV	visit_age_mo	visit_age_mo	0.000991338	0.000991338	0.0004023	130	123	0.0150918	0.176496
PWY-7446..sulfoquinovose.degradation.I	probiotics_firstyr	probiotics_firstyr	0.00114882	0.00114882	0.000467177	130	48	0.0152976	0.177664
P164.PWY-.purine.nucleobases.degradation.I..anaerobic.	mode_of_delivery	Vaginal	-0.0022181	0.0022181	0.000903646	130	49	0.0154797	0.178546
BRANCHED.CHAIN.AA.SYN.PWY-.superpathway.of.branched.chain.amino.acid.biosynthesis	visit_age_mo	visit_age_mo	-0.000978368	0.000978368	0.000399495	130	130	0.0157112	0.179984
NONMEVIPP.PWY-.methylerythritol.phosphate.pathway.I	probiotics_firstyr	probiotics_firstyr	-0.000968371	0.000968371	0.000399029	130	129	0.0166583	0.187017
PWY-7790..UMP.biosynthesis.II	mode_of_delivery	Vaginal	-0.00211604	0.00211604	0.00087105	130	130	0.01655	0.187017
PWY-.781..aspartate.superpathway	visit_age_mo	visit_age_mo	0.00127268	0.00127268	0.000524386	130	110	0.0166507	0.187017
PWY-6163..chorismate.biosynthesis.from.3.dehydroquinate	mode_of_delivery	Vaginal	-0.00207947	0.00207947	0.0008622	130	130	0.0173269	0.191964
PWY-.1586..peptidoglycan.maturation..meso.diaminopimelate.containing.	mode_of_delivery	Vaginal	-0.00301027	0.00301027	0.00124763	130	130	0.0172825	0.191964
PROTOCATECHUATE.ORTHO.CLEAVAGE.PWY-.protocatechuate.degradation.II..ortho.cleavage.pathway.	symptoms	AP	-0.00214203	0.00214203	0.00089655	130	42	0.0183803	0.201571
PWY-7616..methanol.oxidation.to.carbon.dioxide	mode_of_delivery	Vaginal	0.000397199	0.000397199	0.000166326	130	15	0.0184334	0.201571
PWY-7791..UMP.biosynthesis.III	mode_of_delivery	Vaginal	-0.00206874	0.00206874	0.000869851	130	130	0.0189086	0.205433
PWY-6992..1.5.anhydrofructose.degradation	mode_of_delivery	Vaginal	0.00158262	0.00158262	0.000667035	130	53	0.0191875	0.207126
PWY-7118..chitin.deacetylation	visit_age_mo	visit_age_mo	0.00130058	0.00130058	0.000548812	130	108	0.0193276	0.20731
FAO.PWY-.fatty.acid..beta..oxidation.I..generic.	visit_age_mo	visit_age_mo	0.00143499	0.00143499	0.000608719	130	107	0.0199568	0.212704
PWY-5180..toluene.degradation.I..aerobic...via.o.cresol.	symptoms	AP	-0.00251035	0.00251035	0.0010678	130	36	0.02029	0.213556
PWY-6549..L.glutamine.biosynthesis.III	visit_age_mo	visit_age_mo	0.000750941	0.000750941	0.000319751	130	49	0.0204172	0.213556
PWY-7385..1.3.propanediol.biosynthesis..engineered.	symptoms	AP	0.0016909	0.0016909	0.000719819	130	43	0.0203888	0.213556
PWY-1622..formaldehyde.assimilation.I..serine.pathway.	visit_age_mo	visit_age_mo	-0.000276128	0.000276128	0.000117974	130	24	0.0208375	0.216607
GLYCOCAT.PWY-.glycogen.degradation.I	symptoms	AP	-0.0030767	0.0030767	0.00132095	130	112	0.0214548	0.221656
P4.PWY-.superpathway.of.L.lysine..L.threonine.and.L.methionine.biosynthesis.I	visit_age_mo	visit_age_mo	0.00116532	0.00116532	0.000502774	130	116	0.0220866	0.226792
PWY-6470..peptidoglycan.biosynthesis.V...beta..lactam.resistance.	probiotics_firstyr	probiotics_firstyr	-0.000783948	0.000783948	0.000339224	130	32	0.0224703	0.227489
RUMP.PWY-.formaldehyde.oxidation.I	visit_age_mo	visit_age_mo	-0.00059045	0.00059045	0.000255668	130	62	0.0225598	0.227489
THISYNARA.PWY-.superpathway.of.thiamine.diphosphate.biosynthesis.III..eukaryotes.	probiotics_firstyr	probiotics_firstyr	-0.00119936	0.00119936	0.000519015	130	127	0.0224801	0.227489
PWY-5103..L.isoleucine.biosynthesis.III	mode_of_delivery	Vaginal	-0.00199533	0.00199533	0.000867376	130	130	0.0230815	0.231365
PWY-6609..adenine.and.adenosine.salvage.III	probiotics_firstyr	probiotics_firstyr	-0.00111738	0.00111738	0.000487443	130	130	0.0235583	0.234725
PWY-6.389..phytol.degradation	mode_of_delivery	Vaginal	-0.0020241	0.0020241	0.000883876	130	94	0.0236955	0.234725
PWY-.1337..oleate..beta..oxidation	visit_age_mo	visit_age_mo	0.0010636	0.0010636	0.000465062	130	99	0.0238775	0.235145
PWY-7185..UTP.and.CTP.dephosphorylation.I	visit_age_mo	visit_age_mo	0.00132554	0.00132554	0.000581489	130	69	0.0243288	0.238196
FERMENTATION.PWY-.mixed.acid.fermentation	visit_age_mo	visit_age_mo	0.00129629	0.00129629	0.000570313	130	119	0.024737	0.240793	FERMENTATION-PWY	SCFA
FUC.RHAMCAT.PWY-.superpathway.of.fucose.and.rhamnose.degradation	visit_age_mo	visit_age_mo	0.00117947	0.00117947	0.000520301	130	105	0.0251146	0.241692
PWY-.1298..superpathway.of.pyrimidine.deoxyribonucleosides.degradation	mode_of_delivery	Vaginal	-0.00194045	0.00194045	0.000856004	130	127	0.0251165	0.241692
ARGSYN.PWY-.L.arginine.biosynthesis.I..via.L.ornithine.	mode_of_delivery	Vaginal	-0.00214771	0.00214771	0.000950158	130	129	0.0255284	0.242881
CATECHOL.ORTHO.CLEAVAGE.PWY-.catechol.degradation.to..beta..ketoadipate	probiotics_firstyr	probiotics_firstyr	0.00073195	0.00073195	0.000323547	130	28	0.0254073	0.242881
PWY-6305..superpathway.of.putrescine.biosynthesis	visit_age_mo	visit_age_mo	0.00126415	0.00126415	0.000561249	130	119	0.0260426	0.24638

## Sheet: First symptomatic
feature	metadata	value	coef	absolute coef	stderr	N	N.not.0	pval	qval	Pathway.ID	SCFA-association
PWY-7013...S..propane.1.2.diol.degradation	mode_of_delivery	Vaginal	-0.00680942	0.00680942	0.000967816	252	172	1.94063e-11	3.29907e-08	PWY-7013	SCFA
GOLPDLCAT.PWY-.superpathway.of.glycerol.degradation.to.1.3.propanediol	mode_of_delivery	Vaginal	-0.0032456	0.0032456	0.000579893	252	174	5.78755e-08	2.45971e-05
PWY-7456...beta...1.4..mannan.degradation	mode_of_delivery	Vaginal	0.00314501	0.00314501	0.000555637	252	96	4.18131e-08	2.45971e-05
PWY-.1297..superpathway.of.purine.deoxyribonucleosides.degradation	mode_of_delivery	Vaginal	-0.00343843	0.00343843	0.000608826	252	251	4.46071e-08	2.45971e-05
P161.PWY-.acetylene.degradation..anaerobic.	mode_of_delivery	Vaginal	-0.00385122	0.00385122	0.000746856	252	241	5.15908e-07	0.000108907	P161-PWY	SCFA
PROTOCATECHUATE.ORTHO.CLEAVAGE.PWY-.protocatechuate.degradation.II..ortho.cleavage.pathway.	mode_of_delivery	Vaginal	-0.0026022	0.0026022	0.000499467	252	106	3.98484e-07	0.000108907
PWY-5022..4.aminobutanoate.degradation.V	visit_age_mo	visit_age_mo	0.000966387	0.000966387	0.000188253	252	62	5.76567e-07	0.000108907	PWY-5022	SCFA
PWY-5030..L.histidine.degradation.III	mode_of_delivery	Vaginal	0.00441869	0.00441869	0.000858086	252	132	5.33841e-07	0.000108907
PWY-6318..L.phenylalanine.degradation.IV..mammalian..via.side.chain.	mode_of_delivery	Vaginal	-0.00109717	0.00109717	0.000213513	252	54	5.62444e-07	0.000108907
PWY-7210..pyrimidine.deoxyribonucleotides.biosynthesis.from.CTP	probiotics_firstyr	probiotics_firstyr	0.00230021	0.00230021	0.000450713	252	163	6.65598e-07	0.000113152
PWY-6823..molybdopterin.biosynthesis	mode_of_delivery	Vaginal	-0.00302637	0.00302637	0.000599609	252	249	8.70017e-07	0.000134457
PWY-7185..UTP.and.CTP.dephosphorylation.I	probiotics_firstyr	probiotics_firstyr	0.00288704	0.00288704	0.000594666	252	163	2.13788e-06	0.000302866
PWY-5188..tetrapyrrole.biosynthesis.I..from.glutamate.	mode_of_delivery	Vaginal	-0.00317392	0.00317392	0.000662852	252	249	2.90081e-06	0.000308211
PWY-7234..inosine.5..phosphate.biosynthesis.III	visit_age_mo	visit_age_mo	-0.00130596	0.00130596	0.000272739	252	247	2.90057e-06	0.000308211
PWY-7942..5.oxo.L.proline.metabolism	mode_of_delivery	Vaginal	-0.00297344	0.00297344	0.000615924	252	200	2.42345e-06	0.000308211
PWY-.1477..ethanolamine.utilization	mode_of_delivery	Vaginal	-0.00464454	0.00464454	0.000968247	252	247	2.78952e-06	0.000308211
GLYCOLYSIS.TCA.GLYOX.BYPASS..superpathway.of.glycolysis..pyruvate.dehydrogenase..TCA..and.glyoxylate.bypass	mode_of_delivery	Vaginal	-0.00293219	0.00293219	0.000619451	252	153	3.71879e-06	0.000371879
PWY-6478..GDP.D.glycero..alpha..D.manno.heptose.biosynthesis	visit_age_mo	visit_age_mo	0.000610221	0.000610221	0.000129901	252	27	4.3727e-06	0.000412977
PWY-7211..superpathway.of.pyrimidine.deoxyribonucleotides.de.novo.biosynthesis	mode_of_delivery	Vaginal	-0.00313878	0.00313878	0.000687631	252	161	7.89417e-06	0.000706321
PWY-.1297..superpathway.of.purine.deoxyribonucleosides.degradation	visit_age_mo	visit_age_mo	-0.00129774	0.00129774	0.000285977	252	251	8.87513e-06	0.000754386
P221.PWY-.octane.oxidation	mode_of_delivery	Vaginal	-0.00171314	0.00171314	0.000381673	252	140	1.10069e-05	0.000779656
PWY-6185..4.methylcatechol.degradation..ortho.cleavage.	mode_of_delivery	Vaginal	-0.00196348	0.00196348	0.000435928	252	83	1.02836e-05	0.000779656
PWY-.1298..superpathway.of.pyrimidine.deoxyribonucleosides.degradation	mode_of_delivery	Vaginal	-0.00267187	0.00267187	0.000594091	252	249	1.05889e-05	0.000779656
REDCITCYC..TCA.cycle.VI..Helicobacter.	mode_of_delivery	Vaginal	-0.00234806	0.00234806	0.000522989	252	142	1.09501e-05	0.000779656
THREOCAT.PWY-.superpathway.of.L.threonine.metabolism	mode_of_delivery	Vaginal	-0.00205304	0.00205304	0.000459565	252	79	1.20623e-05	0.00082024
PWY-6.389..phytol.degradation	symptoms	AP	-0.00270308	0.00270308	0.00060674	252	157	1.27188e-05	0.000831612
PWY-LZ.257..superpathway.of.fermentation..Chlamydomonas.reinhardtii.	mode_of_delivery	Vaginal	-0.00317787	0.00317787	0.00071897	252	212	1.47875e-05	0.000931064
PWY-7388..octanoyl..acyl.carrier.protein..biosynthesis..mitochondria..yeast.	mode_of_delivery	Vaginal	-0.00183831	0.00183831	0.000416724	252	60	1.53488e-05	0.00093189
PWY-7858...5Z..dodecenoate.biosynthesis.II	visit_age_mo	visit_age_mo	-0.00142665	0.00142665	0.000325779	252	236	1.76066e-05	0.00103049
PWY-.1277..3.phenylpropanoate.and.3..3.hydroxyphenyl.propanoate.degradation	mode_of_delivery	Vaginal	-0.00267222	0.00267222	0.00061127	252	129	1.81851e-05	0.00103049
HCAMHPDEG.PWY-.3.phenylpropanoate.and.3..3.hydroxyphenyl.propanoate.degradation.to.2.hydroxypentadienoate	mode_of_delivery	Vaginal	-0.00248393	0.00248393	0.000572962	252	129	2.12133e-05	0.00112696	HCAMHPDEG-PWY	Propiote
PWY-6690..cinnamate.and.3.hydroxycinnamate.degradation.to.2.hydroxypentadienoate	mode_of_delivery	Vaginal	-0.00248393	0.00248393	0.000572962	252	129	2.12133e-05	0.00112696
P122.PWY-.heterolactic.fermentation	mode_of_delivery	Vaginal	-0.00251907	0.00251907	0.000586118	252	206	2.4825e-05	0.00127886	P122-PWY	SCFA
PWY-6.409..superpathway.of.purine.nucleotide.salvage	visit_age_mo	visit_age_mo	-0.00122864	0.00122864	0.000287892	252	241	2.81672e-05	0.00140836
ECASYN.PWY-.enterobacterial.common.antigen.biosynthesis	mode_of_delivery	Vaginal	-0.00245316	0.00245316	0.000594262	252	188	5.00612e-05	0.00243154
P562.PWY-.myo.inositol.degradation.I	probiotics_firstyr	probiotics_firstyr	0.000841603	0.000841603	0.00020487	252	97	5.43141e-05	0.00256483
UDPNAGSYN.PWY-.UDP.N.acetyl.D.glucosamine.biosynthesis.I	mode_of_delivery	Vaginal	-0.00297389	0.00297389	0.000726531	252	252	5.7646e-05	0.0026486
PWY-5981..CDP.diacylglycerol.biosynthesis.III	mode_of_delivery	Vaginal	-0.00226018	0.00226018	0.000555255	252	239	6.31827e-05	0.00277492
PWY-6588..pyruvate.fermentation.to.acetone	mode_of_delivery	Vaginal	-0.00173795	0.00173795	0.000427157	252	163	6.366e-05	0.00277492
DTDPRHAMSYN.PWY-.dTDP..beta..L.rhamnose.biosynthesis	mode_of_delivery	Vaginal	0.00388405	0.00388405	0.00096102	252	252	7.09549e-05	0.00301558
FASYN.ELONG.PWY-.fatty.acid.elongation....saturated	visit_age_mo	visit_age_mo	-0.001247	0.001247	0.000310688	252	249	7.93099e-05	0.00321016
PWY-6.430..myristate.biosynthesis..mitochondria.	mode_of_delivery	Vaginal	-0.00149317	0.00149317	0.000371953	252	53	7.90774e-05	0.00321016
PWY-7356..thiamine.diphosphate.salvage.IV..yeast.	mode_of_delivery	Vaginal	-0.00299051	0.00299051	0.00074648	252	218	8.17194e-05	0.00323077
PWY-6282..palmitoleate.biosynthesis.I..from..5Z..dodec.5.enoate.	visit_age_mo	visit_age_mo	-0.00123479	0.00123479	0.000311594	252	249	9.70023e-05	0.00374782
PWY-7664..oleate.biosynthesis.IV..anaerobic.	visit_age_mo	visit_age_mo	-0.00122177	0.00122177	0.000309778	252	249	0.000104436	0.00394538
PWY-7198..pyrimidine.deoxyribonucleotides.de.novo.biosynthesis.IV	probiotics_firstyr	probiotics_firstyr	0.00156601	0.00156601	0.000407112	252	220	0.000152467	0.00563464
PPGPPMET.PWY-.ppGpp.metabolism	mode_of_delivery	Vaginal	-0.00281808	0.00281808	0.000735348	252	214	0.000161102	0.00582708
PWY-6168..flavin.biosynthesis.III..fungi.	visit_age_mo	visit_age_mo	0.00142011	0.00142011	0.000372162	252	149	0.000171588	0.00607706
PWY-5837..2.carboxy.1.4.naphthoquinol.biosynthesis	visit_age_mo	visit_age_mo	-0.00107363	0.00107363	0.000281837	252	245	0.000175857	0.00610116
LACTOSECAT.PWY-.lactose.and.galactose.degradation.I	probiotics_firstyr	probiotics_firstyr	0.00137189	0.00137189	0.000363934	252	219	0.000204584	0.00687221
PWY-.862...5Z..dodecenoate.biosynthesis.I	visit_age_mo	visit_age_mo	-0.00114745	0.00114745	0.000304558	252	250	0.000206166	0.00687221
PWY-7269..mitochondrial.NADPH.production..yeast.	mode_of_delivery	Vaginal	-0.00209084	0.00209084	0.000556462	252	125	0.000214281	0.00697787
PWY-.1298..superpathway.of.pyrimidine.deoxyribonucleosides.degradation	visit_age_mo	visit_age_mo	-0.0010474	0.0010474	0.000279056	252	249	0.000217545	0.00697787
METHGLYUT.PWY-.superpathway.of.methylglyoxal.degradation	mode_of_delivery	Vaginal	-0.00167257	0.00167257	0.000447079	252	216	0.000227846	0.00717292
PWY-5180..toluene.degradation.I..aerobic...via.o.cresol.	mode_of_delivery	Vaginal	-0.00204213	0.00204213	0.000548767	252	74	0.000245433	0.0075861
OANTIGEN.PWY-.O.antigen.building.blocks.biosynthesis..E..coli.	symptoms	AP	0.00229487	0.00229487	0.000620416	252	250	0.000266868	0.00795922
PWY-7165..L.ascorbate.biosynthesis.VIII..engineered.pathway.	mode_of_delivery	Vaginal	-0.00150591	0.00150591	0.000406893	252	39	0.000264804	0.00795922
PWY-5464..superpathway.of.cytosolic.glycolysis..plants...pyruvate.dehydrogenase.and.TCA.cycle	symptoms	AP	-0.000702462	0.000702462	0.000190324	252	31	0.000274987	0.00805996
PWY-6545..pyrimidine.deoxyribonucleotides.de.novo.biosynthesis.III	probiotics_firstyr	probiotics_firstyr	0.00116528	0.00116528	0.000316585	252	188	0.000285534	0.00809013
PWY-ZNC.1..assimilatory.sulfate.reduction.IV	visit_age_mo	visit_age_mo	-0.00106159	0.00106159	0.000288126	252	233	0.00028162	0.00809013
PWY-7211..superpathway.of.pyrimidine.deoxyribonucleotides.de.novo.biosynthesis	probiotics_firstyr	probiotics_firstyr	0.00135572	0.00135572	0.000369073	252	161	0.000293555	0.00818103
ARGSYNBSUB.PWY-.L.arginine.biosynthesis.II..acetyl.cycle.	mode_of_delivery	Vaginal	-0.00235694	0.00235694	0.000648575	252	252	0.000339404	0.00901543
PWY-5981..CDP.diacylglycerol.biosynthesis.III	probiotics_firstyr	probiotics_firstyr	0.00108513	0.00108513	0.000298023	252	239	0.000330679	0.00901543
SO4ASSIM.PWY-.assimilatory.sulfate.reduction.I	visit_age_mo	visit_age_mo	-0.0012158	0.0012158	0.000334512	252	243	0.000338764	0.00901543
PWY-5855..ubiquinol.7.biosynthesis..early.decarboxylation.	visit_age_mo	visit_age_mo	-0.000944628	0.000944628	0.000261033	252	209	0.000358924	0.00938724
PWY-5913..partial.TCA.cycle..obligate.autotrophs.	mode_of_delivery	Vaginal	-0.00249878	0.00249878	0.000692354	252	244	0.000371905	0.00948888
PWY-6.391..fatty.acid..beta..oxidation.VI..mammalian.peroxisome.	mode_of_delivery	Vaginal	-0.00160795	0.00160795	0.000445712	252	109	0.000373974	0.00948888
PWY-.301..L.ascorbate.degradation.I..bacterial..anaerobic.	visit_age_mo	visit_age_mo	-0.00126055	0.00126055	0.000353506	252	237	0.000435394	0.0108848
PWY-.301..L.ascorbate.degradation.I..bacterial..anaerobic.	mode_of_delivery	Vaginal	-0.00266842	0.00266842	0.000752589	252	237	0.000468384	0.0115399
LPSSYN.PWY-.superpathway.of.lipopolysaccharide.biosynthesis	probiotics_firstyr	probiotics_firstyr	-0.000493899	0.000493899	0.000140066	252	31	0.000502424	0.0121351
PWY-4984..urea.cycle	visit_age_mo	visit_age_mo	0.00118821	0.00118821	0.0003372	252	158	0.000506819	0.0121351
PWY-6607..guanosine.nucleotides.degradation.I	visit_age_mo	visit_age_mo	0.000836592	0.000836592	0.000238273	252	147	0.000530401	0.0123518
PWY-7187..pyrimidine.deoxyribonucleotides.de.novo.biosynthesis.II	visit_age_mo	visit_age_mo	-0.00100075	0.00100075	0.000284759	252	227	0.000524148	0.0123518
NAD.BIOSYNTHESIS.II..NAD.salvage.pathway.III..to.nicotinamide.riboside.	visit_age_mo	visit_age_mo	-0.000878255	0.000878255	0.000250588	252	230	0.000542479	0.0124624
ARGININE.SYN4.PWY-.L.ornithine.biosynthesis.II	mode_of_delivery	Vaginal	0.00278917	0.00278917	0.000797512	252	233	0.000557086	0.0126273
NAD.BIOSYNTHESIS.II..NAD.salvage.pathway.III..to.nicotinamide.riboside.	mode_of_delivery	Vaginal	-0.00185669	0.00185669	0.000533484	252	230	0.00059194	0.013225
PWY-ZNC.1..assimilatory.sulfate.reduction.IV	mode_of_delivery	Vaginal	-0.00213206	0.00213206	0.0006134	252	233	0.000601523	0.013225
PYRIDNUCSYN.PWY-.NAD.de.novo.biosynthesis.I..from.aspartate.	visit_age_mo	visit_age_mo	0.000994768	0.000994768	0.000286401	252	249	0.000606796	0.013225
P221.PWY-.octane.oxidation	symptoms	AP	-0.00142955	0.00142955	0.000412451	252	140	0.00062284	0.0134029
HEME.BIOSYNTHESIS.II..heme.b.biosynthesis.I..aerobic.	visit_age_mo	visit_age_mo	-0.000989815	0.000989815	0.000286475	252	244	0.000647191	0.013583
PWY-5138..fatty.acid..beta..oxidation.IV..unsaturated..even.number.	visit_age_mo	visit_age_mo	-0.00110062	0.00110062	0.000318263	252	224	0.000640277	0.013583
CENTFERM.PWY-.pyruvate.fermentation.to.butanoate	mode_of_delivery	Vaginal	-0.00132882	0.00132882	0.000385727	252	89	0.000670874	0.0139084	CENTFERM-PWY	SCFA
FASYN.INITIAL.PWY-.superpathway.of.fatty.acid.biosynthesis.initiation..E..coli.	visit_age_mo	visit_age_mo	0.000887316	0.000887316	0.00025816	252	105	0.000689818	0.0141288
NONOXIPENT.PWY-.pentose.phosphate.pathway..non.oxidative.branch..I	visit_age_mo	visit_age_mo	-0.00112584	0.00112584	0.000328742	252	252	0.000720534	0.014337
PWY-702..L.methionine.biosynthesis.II	mode_of_delivery	Vaginal	-0.00262084	0.00262084	0.000765694	252	252	0.000725282	0.014337
PWY-8131..5..deoxyadenosine.degradation.II	mode_of_delivery	Vaginal	-0.00222793	0.00222793	0.000650079	252	187	0.000714304	0.014337
PWY-7858...5Z..dodecenoate.biosynthesis.II	mode_of_delivery	Vaginal	-0.00235659	0.00235659	0.000693562	252	236	0.000791681	0.0154696
PWY-6590..superpathway.of.Clostridium.acetobutylicum.acidogenic.fermentation	mode_of_delivery	Vaginal	-0.00145106	0.00145106	0.00042835	252	89	0.000820439	0.0157695
PWY-.1337..oleate..beta..oxidation	visit_age_mo	visit_age_mo	-0.00100635	0.00100635	0.000297228	252	201	0.00082558	0.0157695
PWY-801..homocysteine.and.cysteine.interconversion	mode_of_delivery	Vaginal	-0.00133676	0.00133676	0.00039543	252	140	0.000840823	0.0158822
PWY-5659..GDP.mannose.biosynthesis	visit_age_mo	visit_age_mo	-0.000966292	0.000966292	0.000286298	252	251	0.000856721	0.0160047
ARGSYN.PWY-.L.arginine.biosynthesis.I..via.L.ornithine.	mode_of_delivery	Vaginal	-0.00204811	0.00204811	0.000609522	252	252	0.000902234	0.0164924
PWY-6876..isopropanol.biosynthesis..engineered.	mode_of_delivery	Vaginal	-0.000720796	0.000720796	0.000214441	252	29	0.000898826	0.0164924
PWY-6182..superpathway.of.salicylate.degradation	mode_of_delivery	Vaginal	-0.00125171	0.00125171	0.000374011	252	57	0.000945256	0.0166901
PWY-7094..fatty.acid.salvage	visit_age_mo	visit_age_mo	-0.000977979	0.000977979	0.00029241	252	203	0.000952319	0.0166901
PWY-8178..pentose.phosphate.pathway..non.oxidative.branch..II	mode_of_delivery	Vaginal	-0.00218312	0.00218312	0.000651263	252	252	0.000927711	0.0166901
PYRIDNUCSYN.PWY-.NAD.de.novo.biosynthesis.I..from.aspartate.	mode_of_delivery	Vaginal	0.00204041	0.00204041	0.000609728	252	249	0.000946145	0.0166901
HEMESYN2.PWY-.heme.b.biosynthesis.II..oxygen.independent.	visit_age_mo	visit_age_mo	-0.00109522	0.00109522	0.000328804	252	248	0.00099802	0.0169393
PWY-5913..partial.TCA.cycle..obligate.autotrophs.	visit_age_mo	visit_age_mo	-0.00108247	0.00108247	0.000325212	252	244	0.0010064	0.0169393
PWY-7688..dTDP..alpha..D.ravidosamine.and.dTDP.4.acetyl..alpha..D.ravidosamine.biosynthesis	symptoms	AP	0.0013656	0.0013656	0.000409955	252	29	0.000997442	0.0169393
PWY-7883..anhydromuropeptides.recycling.II	mode_of_delivery	Vaginal	-0.00194348	0.00194348	0.000582553	252	224	0.000980256	0.0169393
LIPA.CORESYN.PWY-.lipid.A.core.biosynthesis..E..coli.K.12.	probiotics_firstyr	probiotics_firstyr	-0.000355017	0.000355017	0.000106885	252	36	0.00103092	0.0171821
PWY-.1241..ADP.L.glycero..beta..D.manno.heptose.biosynthesis	mode_of_delivery	Vaginal	-0.00217961	0.00217961	0.000658149	252	244	0.00106595	0.0175934
PWY-7315..dTDP.N.acetylthomosamine.biosynthesis	mode_of_delivery	Vaginal	-0.00202863	0.00202863	0.000613274	252	228	0.00108011	0.0176556
HEMESYN2.PWY-.heme.b.biosynthesis.II..oxygen.independent.	mode_of_delivery	Vaginal	-0.00230754	0.00230754	0.000700002	252	248	0.00112292	0.0181807
PWY-6545..pyrimidine.deoxyribonucleotides.de.novo.biosynthesis.III	mode_of_delivery	Vaginal	-0.00193191	0.00193191	0.00058984	252	188	0.00120665	0.019352
P185.PWY-.formaldehyde.assimilation.III..dihydroxyacetone.cycle.	mode_of_delivery	Vaginal	-0.00232282	0.00232282	0.000710069	252	188	0.00122335	0.0194363
X3.HYDROXYPHENYLACETATE.DEGRADATION.PWY-.4.hydroxyphenylacetate.degradation	symptoms	AP	-0.00136774	0.00136774	0.000419759	252	89	0.00127782	0.0199293	3-HYDROXYPHENYLACETATE-DEGRADATION-PWY	Acetate
PWY-.1479..tRNA.processing	visit_age_mo	visit_age_mo	-0.00107155	0.00107155	0.000328768	252	232	0.00127396	0.0199293
PWY-5505..L.glutamate.and.L.glutamine.biosynthesis	visit_age_mo	visit_age_mo	0.000515111	0.000515111	0.000158764	252	105	0.00133906	0.0206946
FERMENTATION.PWY-.mixed.acid.fermentation	visit_age_mo	visit_age_mo	-0.00116994	0.00116994	0.000363968	252	241	0.00148132	0.0226868	FERMENTATION-PWY	SCFA
AST.PWY-.L.arginine.degradation.II..AST.pathway.	mode_of_delivery	Vaginal	-0.00194527	0.00194527	0.000608243	252	218	0.00156363	0.0228501
NONOXIPENT.PWY-.pentose.phosphate.pathway..non.oxidative.branch..I	mode_of_delivery	Vaginal	-0.00223584	0.00223584	0.000699869	252	252	0.0015821	0.0228501
PWY-6595..superpathway.of.guanosine.nucleotides.degradation..plants.	visit_age_mo	visit_age_mo	0.000697345	0.000697345	0.00021836	252	144	0.00158793	0.0228501
PWY-7616..methanol.oxidation.to.carbon.dioxide	mode_of_delivery	Vaginal	-0.000419122	0.000419122	0.000130785	252	32	0.00153022	0.0228501
PWY-7883..anhydromuropeptides.recycling.II	visit_age_mo	visit_age_mo	-0.000876396	0.000876396	0.000273636	252	224	0.00153991	0.0228501
PWY-.1296..purine.ribonucleosides.degradation	mode_of_delivery	Vaginal	-0.00222764	0.00222764	0.00069802	252	252	0.00159951	0.0228501
PWY-.1479..tRNA.processing	mode_of_delivery	Vaginal	-0.00223477	0.00223477	0.000699924	252	232	0.00159149	0.0228501
URSIN.PWY-.ureide.biosynthesis	mode_of_delivery	Vaginal	-0.000690126	0.000690126	0.000216153	252	28	0.00159206	0.0228501
DENOVOPURINE2.PWY-.superpathway.of.purine.nucleotides.de.novo.biosynthesis.II	visit_age_mo	visit_age_mo	-0.0010752	0.0010752	0.000338172	252	226	0.00166409	0.0235746
PWY-922..mevalonate.pathway.I..eukaryotes.and.bacteria.	visit_age_mo	visit_age_mo	-0.000489464	0.000489464	0.000154345	252	124	0.0017099	0.0240234
PWY-7200..superpathway.of.pyrimidine.deoxyribonucleoside.salvage	visit_age_mo	visit_age_mo	-0.000444604	0.000444604	0.000141218	252	41	0.00184387	0.0255901
PWY-7400..L.arginine.biosynthesis.IV..archaebacteria.	mode_of_delivery	Vaginal	-0.00191783	0.00191783	0.000609399	252	247	0.00185152	0.0255901
PWY-6292..superpathway.of.L.cysteine.biosynthesis..mammalian.	mode_of_delivery	Vaginal	-0.00160599	0.00160599	0.000515584	252	166	0.00205737	0.0282059
PWY-5690..TCA.cycle.II..plants.and.fungi.	symptoms	AP	-0.000941232	0.000941232	0.000302806	252	69	0.00210155	0.0285811
COLANSYN.PWY-.colanic.acid.building.blocks.biosynthesis	mode_of_delivery	Vaginal	0.00220643	0.00220643	0.000712528	252	218	0.00218335	0.0285904
PWY-5189..tetrapyrrole.biosynthesis.II..from.glycine.	visit_age_mo	visit_age_mo	-0.00094775	0.00094775	0.00030626	252	230	0.00219777	0.0285904
PWY-6328..L.lysine.degradation.X	visit_age_mo	visit_age_mo	0.000285407	0.000285407	9.22503e-05	252	25	0.00220314	0.0285904
PWY-6572..chondroitin.sulfate.degradation.I..bacterial.	mode_of_delivery	Vaginal	0.00155698	0.00155698	0.000501745	252	34	0.00213771	0.0285904
PWY-7118..chitin.deacetylation	mode_of_delivery	Vaginal	-0.0021158	0.0021158	0.000681652	252	230	0.00213216	0.0285904
PWY-7323..superpathway.of.GDP.mannose.derived.O.antigen.building.blocks.biosynthesis	mode_of_delivery	Vaginal	0.00201672	0.00201672	0.000650923	252	213	0.00217181	0.0285904
PWY-2942..L.lysine.biosynthesis.III	visit_age_mo	visit_age_mo	0.00127369	0.00127369	0.000412167	252	230	0.0022291	0.0287082
PWY-6.389..phytol.degradation	mode_of_delivery	Vaginal	-0.00172837	0.00172837	0.000561463	252	157	0.00231648	0.0296091
PWY-622..starch.biosynthesis	visit_age_mo	visit_age_mo	0.00145763	0.00145763	0.000476114	252	134	0.00244559	0.0310262
GLYCOL.GLYOXDEG.PWY-.superpathway.of.glycol.metabolism.and.degradation	mode_of_delivery	Vaginal	-0.00127011	0.00127011	0.000415298	252	161	0.00247089	0.0311149
PWY-5138..fatty.acid..beta..oxidation.IV..unsaturated..even.number.	mode_of_delivery	Vaginal	-0.00206937	0.00206937	0.000677561	252	224	0.00250415	0.0313019
PWY-7237..myo...chiro..and.scyllo.inositol.degradation	probiotics_firstyr	probiotics_firstyr	0.00202716	0.00202716	0.000664476	252	168	0.0025315	0.0314128
PWY-8178..pentose.phosphate.pathway..non.oxidative.branch..II	visit_age_mo	visit_age_mo	-0.000931894	0.000931894	0.000305911	252	252	0.00256805	0.0316354
HOMOSER.METSYN.PWY-.L.methionine.biosynthesis.I	visit_age_mo	visit_age_mo	-0.000973176	0.000973176	0.000319808	252	239	0.00259528	0.0316643
PWY-7208..superpathway.of.pyrimidine.nucleobases.salvage	probiotics_firstyr	probiotics_firstyr	0.00107289	0.00107289	0.000352748	252	250	0.00260765	0.0316643
PWY-5100..pyruvate.fermentation.to.acetate.and.lactate.II	mode_of_delivery	Vaginal	-0.00237434	0.00237434	0.000781574	252	250	0.00263804	0.0318062	PWY-5100	SCFA
PWY-7385..1.3.propanediol.biosynthesis..engineered.	visit_age_mo	visit_age_mo	0.000697855	0.000697855	0.000230662	252	102	0.00274497	0.0328623
PWY-5088..L.glutamate.degradation.VIII..to.propanoate.	visit_age_mo	visit_age_mo	0.000127452	0.000127452	4.22891e-05	252	13	0.00284839	0.0331661	PWY-5088	SCFA
PWY-5897..superpathway.of.menaquinol.11.biosynthesis	visit_age_mo	visit_age_mo	-0.000795277	0.000795277	0.000263842	252	244	0.00284485	0.0331661
PWY-5898..superpathway.of.menaquinol.12.biosynthesis	visit_age_mo	visit_age_mo	-0.000795277	0.000795277	0.000263842	252	244	0.00284485	0.0331661
PWY-5899..superpathway.of.menaquinol.13.biosynthesis	visit_age_mo	visit_age_mo	-0.000795277	0.000795277	0.000263842	252	244	0.00284485	0.0331661
PWY-6292..superpathway.of.L.cysteine.biosynthesis..mammalian.	symptoms	AP	-0.00167545	0.00167545	0.000557162	252	166	0.0029097	0.0336496
PWY-7391..isoprene.biosynthesis.II..engineered.	visit_age_mo	visit_age_mo	-0.000379744	0.000379744	0.000126913	252	70	0.00305082	0.0350432
PWY-5497..purine.nucleobases.degradation.II..anaerobic.	visit_age_mo	visit_age_mo	0.000740056	0.000740056	0.000247796	252	169	0.00310529	0.0354295
PWY-5855..ubiquinol.7.biosynthesis..early.decarboxylation.	mode_of_delivery	Vaginal	-0.00165678	0.00165678	0.000555721	252	209	0.00315694	0.0355542
PWY-7391..isoprene.biosynthesis.II..engineered.	mode_of_delivery	Vaginal	-0.000805491	0.000805491	0.000270189	252	70	0.00315805	0.0355542
PWY-5860..superpathway.of.demethylmenaquinol.6.biosynthesis.I	mode_of_delivery	Vaginal	-0.00201798	0.00201798	0.000678088	252	212	0.00321033	0.035905
SULFATE.CYS.PWY-.superpathway.of.sulfate.assimilation.and.cysteine.biosynthesis	visit_age_mo	visit_age_mo	-0.000883289	0.000883289	0.000298084	252	243	0.00334174	0.0371305
FAO.PWY-.fatty.acid..beta..oxidation.I..generic.	visit_age_mo	visit_age_mo	-0.00112809	0.00112809	0.000381159	252	226	0.00337958	0.0372426
GLUCUROCAT.PWY-.superpathway.of..beta..D.glucuronosides.degradation	symptoms	AP	0.00194939	0.00194939	0.000659608	252	211	0.0034249	0.0372426
METSYN.PWY-.superpathway.of.L.homoserine.and.L.methionine.biosynthesis	visit_age_mo	visit_age_mo	-0.00102456	0.00102456	0.000347067	252	239	0.00346051	0.0372426
PWY-5676..acetyl.CoA.fermentation.to.butanoate.II	mode_of_delivery	Vaginal	-0.00169446	0.00169446	0.000573463	252	181	0.00343127	0.0372426	PWY-5676	SCFA
PWY-5918..superpathway.of.heme.b.biosynthesis.from.glutamate	visit_age_mo	visit_age_mo	-0.000865683	0.000865683	0.000293254	252	236	0.00346137	0.0372426
GLUDEG.I.PWY-.GABA.shunt	mode_of_delivery	Vaginal	0.00159638	0.00159638	0.000542269	252	160	0.00355012	0.0379573
PWY-5347..superpathway.of.L.methionine.biosynthesis..transsulfuration.	visit_age_mo	visit_age_mo	-0.00103089	0.00103089	0.000350789	252	239	0.00360707	0.0380871
PWY-5994..palmitate.biosynthesis..type.I.fatty.acid.synthase.	visit_age_mo	visit_age_mo	0.000588455	0.000588455	0.000200172	252	62	0.00359613	0.0380871
GLUTORN.PWY-.L.ornithine.biosynthesis.I	mode_of_delivery	Vaginal	-0.00170272	0.00170272	0.000579797	252	252	0.00362979	0.0380903
MET.SAM.PWY-.superpathway.of.S.adenosyl.L.methionine.biosynthesis	visit_age_mo	visit_age_mo	-0.000978152	0.000978152	0.000334268	252	239	0.00375036	0.0391142
PWY-7340..9.cis..11.trans.octadecadienoyl.CoA.degradation..isomerase.dependent..yeast.	mode_of_delivery	Vaginal	-0.000960765	0.000960765	0.000329316	252	102	0.00385413	0.0397093
PWY-.166..superpathway.of.pyrimidine.deoxyribonucleotides.de.novo.biosynthesis..E..coli.	mode_of_delivery	Vaginal	-0.00179876	0.00179876	0.000616223	252	230	0.00383568	0.0397093
P161.PWY-.acetylene.degradation..anaerobic.	visit_age_mo	visit_age_mo	-0.00101931	0.00101931	0.000350812	252	241	0.00399852	0.0409487	P161-PWY	SCFA
PWY-5918..superpathway.of.heme.b.biosynthesis.from.glutamate	mode_of_delivery	Vaginal	-0.00180818	0.00180818	0.000624318	252	236	0.00411502	0.0416401
PYRIDOXSYN.PWY-.pyridoxal.5..phosphate.biosynthesis.I	mode_of_delivery	Vaginal	0.00183897	0.00183897	0.000634855	252	241	0.00410971	0.0416401
HEME.BIOSYNTHESIS.II.1..heme.b.biosynthesis.V..aerobic.	visit_age_mo	visit_age_mo	-0.000938535	0.000938535	0.000324907	252	237	0.00421276	0.0418813
PWY-6703..preQ0.biosynthesis	mode_of_delivery	Vaginal	0.00169424	0.00169424	0.000586171	252	252	0.00419041	0.0418813
PWY-.1296..purine.ribonucleosides.degradation	visit_age_mo	visit_age_mo	-0.000947309	0.000947309	0.000327873	252	252	0.00420462	0.0418813
PWY-6936..seleno.amino.acid.biosynthesis..plants.	visit_age_mo	visit_age_mo	-0.000748745	0.000748745	0.000260528	252	252	0.0044068	0.0435556
PWY-6215..4.chlorobenzoate.degradation	visit_age_mo	visit_age_mo	0.000103304	0.000103304	3.60994e-05	252	13	0.00457568	0.0449633
PWY-5981..CDP.diacylglycerol.biosynthesis.III	visit_age_mo	visit_age_mo	-0.000745294	0.000745294	0.000260814	252	239	0.00463295	0.0452645
PWY-561..superpathway.of.glyoxylate.cycle.and.fatty.acid.degradation	mode_of_delivery	Vaginal	-0.00222287	0.00222287	0.000779744	252	205	0.00472981	0.0459467
PWY-5837..2.carboxy.1.4.naphthoquinol.biosynthesis	mode_of_delivery	Vaginal	-0.00170832	0.00170832	0.000600013	252	245	0.00478232	0.0461929
PWY-7196..superpathway.of.pyrimidine.ribonucleosides.salvage	mode_of_delivery	Vaginal	-0.000550837	0.000550837	0.000193928	252	18	0.00488098	0.0468794
PWY-8187..L.arginine.degradation.XIII..reductive.Stickland.reaction.	visit_age_mo	visit_age_mo	-0.000882571	0.000882571	0.000311133	252	247	0.00493737	0.0471546
PWY-6168..flavin.biosynthesis.III..fungi.	mode_of_delivery	Vaginal	0.00223045	0.00223045	0.000792308	252	149	0.00526891	0.049487
PWY-6961..L.ascorbate.degradation.II..bacterial..aerobic.	visit_age_mo	visit_age_mo	-0.000995098	0.000995098	0.000353053	252	214	0.00521479	0.049487
PWY-.1221..putrescine.degradation.II	visit_age_mo	visit_age_mo	0.000275	0.000275	9.76487e-05	252	30	0.00525163	0.049487
GLUCARDEG.PWY-.D.glucarate.degradation.I	mode_of_delivery	Vaginal	-0.00182005	0.00182005	0.000647771	252	229	0.00535555	0.0498008
PWY-7184..pyrimidine.deoxyribonucleotides.de.novo.biosynthesis.I	probiotics_firstyr	probiotics_firstyr	0.000989679	0.000989679	0.000352276	252	238	0.00536091	0.0498008
PWY-7197..pyrimidine.deoxyribonucleotide.phosphorylation	probiotics_firstyr	probiotics_firstyr	0.000963219	0.000963219	0.000343393	252	250	0.00543198	0.0501868
LIPASYN.PWY-.phospholipases	mode_of_delivery	Vaginal	-0.00222408	0.00222408	0.000794065	252	84	0.00549961	0.050537
X3.HYDROXYPHENYLACETATE.DEGRADATION.PWY-.4.hydroxyphenylacetate.degradation	mode_of_delivery	Vaginal	-0.00108231	0.00108231	0.000388434	252	89	0.00574454	0.0525038	3-HYDROXYPHENYLACETATE-DEGRADATION-PWY	Acetate
PWY-5723..Rubisco.shunt	visit_age_mo	visit_age_mo	-0.00110461	0.00110461	0.000397958	252	228	0.00592994	0.0539086
PWY-6.409..superpathway.of.purine.nucleotide.salvage	mode_of_delivery	Vaginal	-0.00169985	0.00169985	0.000612903	252	241	0.00596997	0.0539838
PWY-.1337..oleate..beta..oxidation	mode_of_delivery	Vaginal	-0.00175135	0.00175135	0.000632779	252	201	0.00607275	0.0546227
PWY-7383..anaerobic.energy.metabolism..invertebrates..cytosol.	visit_age_mo	visit_age_mo	0.000656004	0.000656004	0.000237413	252	115	0.00615586	0.0550787
PWY-7384..anaerobic.energy.metabolism..invertebrates..mitochondrial.	visit_age_mo	visit_age_mo	0.000139856	0.000139856	5.06775e-05	252	17	0.00621829	0.055346	PWY-7384	SCFA
PWY-5690..TCA.cycle.II..plants.and.fungi.	visit_age_mo	visit_age_mo	0.000361685	0.000361685	0.00013162	252	69	0.00643908	0.0568836
PWY-5972..stearate.biosynthesis.I..animals.	mode_of_delivery	Vaginal	-0.000688592	0.000688592	0.000250674	252	80	0.00645796	0.0568836
PWY-7234..inosine.5..phosphate.biosynthesis.III	mode_of_delivery	Vaginal	-0.00159379	0.00159379	0.000580644	252	247	0.00649799	0.0569412
HEME.BIOSYNTHESIS.II..heme.b.biosynthesis.I..aerobic.	mode_of_delivery	Vaginal	-0.00166975	0.00166975	0.000609885	252	244	0.00663492	0.0572556
PWY-5417..catechol.degradation.III..ortho.cleavage.pathway.	mode_of_delivery	Vaginal	-0.00134799	0.00134799	0.000492148	252	73	0.00661195	0.0572556
PWY-5431..aromatic.compounds.degradation.via..beta..ketoadipate	mode_of_delivery	Vaginal	-0.00134799	0.00134799	0.000492148	252	73	0.00661195	0.0572556
PWY-6478..GDP.D.glycero..alpha..D.manno.heptose.biosynthesis	mode_of_delivery	Vaginal	0.000756288	0.000756288	0.000276551	252	27	0.00669577	0.0574889
PWY-822..fructan.biosynthesis	visit_age_mo	visit_age_mo	-0.000361687	0.000361687	0.000132355	252	122	0.00673551	0.0575396
P185.PWY-.formaldehyde.assimilation.III..dihydroxyacetone.cycle.	probiotics_firstyr	probiotics_firstyr	0.00104022	0.00104022	0.000381116	252	188	0.00680138	0.0578118
FAO.PWY-.fatty.acid..beta..oxidation.I..generic.	mode_of_delivery	Vaginal	-0.002206	0.002206	0.000811462	252	226	0.00702176	0.059388
ARGININE.SYN4.PWY-.L.ornithine.biosynthesis.II	visit_age_mo	visit_age_mo	0.00101637	0.00101637	0.000374606	252	233	0.00713355	0.059507
PWY-2942..L.lysine.biosynthesis.III	mode_of_delivery	Vaginal	0.0023731	0.0023731	0.000877476	252	230	0.00731732	0.059507
PWY-5136..fatty.acid..beta..oxidation.II..plant.peroxisome.	mode_of_delivery	Vaginal	-0.00219861	0.00219861	0.00081219	252	236	0.00726281	0.059507
PWY-5910..superpathway.of.geranylgeranyldiphosphate.biosynthesis.I..via.mevalonate.	visit_age_mo	visit_age_mo	-0.00043304	0.00043304	0.000159933	252	113	0.00724976	0.059507
PWY-5941..glycogen.degradation.II	mode_of_delivery	Vaginal	-0.00217575	0.00217575	0.000804225	252	252	0.00729738	0.059507
PWY-6572..chondroitin.sulfate.degradation.I..bacterial.	visit_age_mo	visit_age_mo	0.000637495	0.000637495	0.000235679	252	34	0.00730734	0.059507
PWY-6630..superpathway.of.L.tyrosine.biosynthesis	mode_of_delivery	Vaginal	-0.00157727	0.00157727	0.000584039	252	247	0.0073997	0.059507
PWY-7187..pyrimidine.deoxyribonucleotides.de.novo.biosynthesis.II	mode_of_delivery	Vaginal	-0.00164544	0.00164544	0.000606233	252	227	0.00711182	0.059507
PWY-.1415..superpathway.of.heme.b.biosynthesis.from.uroporphyrinogen.III	mode_of_delivery	Vaginal	-0.00199638	0.00199638	0.000738181	252	220	0.00731751	0.059507
PWY-.845..superpathway.of.pyridoxal.5..phosphate.biosynthesis.and.salvage	mode_of_delivery	Vaginal	0.00172226	0.00172226	0.00063784	252	241	0.00741001	0.059507
PWY-6.399..gluconeogenesis.III	visit_age_mo	visit_age_mo	0.000684289	0.000684289	0.000253473	252	110	0.00742088	0.059507
PWY-922..mevalonate.pathway.I..eukaryotes.and.bacteria.	mode_of_delivery	Vaginal	-0.000881954	0.000881954	0.00032859	252	124	0.00776552	0.0619783
PWY-6823..molybdopterin.biosynthesis	visit_age_mo	visit_age_mo	-0.000755263	0.000755263	0.000281648	252	249	0.00782135	0.0621322
PWY-7094..fatty.acid.salvage	mode_of_delivery	Vaginal	-0.0016663	0.0016663	0.000622522	252	203	0.00793336	0.0627289
P164.PWY-.purine.nucleobases.degradation.I..anaerobic.	mode_of_delivery	Vaginal	-0.00176309	0.00176309	0.000660559	252	121	0.00811005	0.0638291
P108.PWY-.pyruvate.fermentation.to.propanoate.I	mode_of_delivery	Vaginal	-0.00154266	0.00154266	0.000579045	252	161	0.00822665	0.0644484	P108-PWY	SCFA
PWY-5030..L.histidine.degradation.III	visit_age_mo	visit_age_mo	0.00107189	0.00107189	0.000403059	252	132	0.00834018	0.0647411
PWY-7238..sucrose.biosynthesis.II	mode_of_delivery	Vaginal	-0.00240209	0.00240209	0.000903227	252	252	0.00833867	0.0647411
PWY-6168..flavin.biosynthesis.III..fungi.	probiotics_firstyr	probiotics_firstyr	-0.00112763	0.00112763	0.000425257	252	149	0.0085282	0.0658997
PWY-7208..superpathway.of.pyrimidine.nucleobases.salvage	symptoms	AP	-0.00188073	0.00188073	0.000710215	252	250	0.00861558	0.0662737
UDPNAGSYN.PWY-.UDP.N.acetyl.D.glucosamine.biosynthesis.I	visit_age_mo	visit_age_mo	-0.000902813	0.000902813	0.000341266	252	252	0.00868077	0.0664743
PWY-5028..L.histidine.degradation.II	probiotics_firstyr	probiotics_firstyr	0.000715349	0.000715349	0.00027092	252	93	0.0088072	0.0671401
ORNDEG.PWY-.superpathway.of.ornithine.degradation	visit_age_mo	visit_age_mo	-0.000996501	0.000996501	0.000377856	252	226	0.00888827	0.0674556
PWY-5367..petroselinate.biosynthesis	mode_of_delivery	Vaginal	-0.00137461	0.00137461	0.000526471	252	207	0.0095803	0.0723845
P42.PWY-.incomplete.reductive.TCA.cycle	symptoms	AP	-0.00153768	0.00153768	0.000589748	252	201	0.00967989	0.0728134
PWY-.1261..anhydromuropeptides.recycling.I	visit_age_mo	visit_age_mo	-0.00078676	0.00078676	0.000302195	252	239	0.00978678	0.0732931
CATECHOL.ORTHO.CLEAVAGE.PWY-.catechol.degradation.to..beta..ketoadipate	mode_of_delivery	Vaginal	-0.00113996	0.00113996	0.0004401	252	75	0.0101613	0.0757642
PWY-5747..2.methylcitrate.cycle.II	mode_of_delivery	Vaginal	-0.00103485	0.00103485	0.000400169	252	150	0.0102821	0.07633
LIPASYN.PWY-.phospholipases	probiotics_firstyr	probiotics_firstyr	0.00110027	0.00110027	0.000426199	252	84	0.0104119	0.0766829
PWY-5989..stearate.biosynthesis.II..bacteria.and.plants.	visit_age_mo	visit_age_mo	-0.000779353	0.000779353	0.00030192	252	248	0.0104199	0.0766829
PPGPPMET.PWY-.ppGpp.metabolism	visit_age_mo	visit_age_mo	-0.000889828	0.000889828	0.000345407	252	214	0.0105721	0.0774676
GALACT.GLUCUROCAT.PWY-.superpathway.of.hexuronide.and.hexuronate.degradation	symptoms	AP	0.0015769	0.0015769	0.000613773	252	152	0.0107817	0.0786647
PWY-5910..superpathway.of.geranylgeranyldiphosphate.biosynthesis.I..via.mevalonate.	probiotics_firstyr	probiotics_firstyr	0.000468875	0.000468875	0.000182749	252	113	0.0108888	0.0791064
PWY-922..mevalonate.pathway.I..eukaryotes.and.bacteria.	probiotics_firstyr	probiotics_firstyr	0.000451296	0.000451296	0.000176364	252	124	0.011098	0.0802836
PWY-6807..xyloglucan.degradation.II..exoglucanase.	mode_of_delivery	Vaginal	0.000585557	0.000585557	0.000229169	252	13	0.0112151	0.0807867
P42.PWY-.incomplete.reductive.TCA.cycle	probiotics_firstyr	probiotics_firstyr	0.000747861	0.000747861	0.000292915	252	201	0.011277	0.0808897
TCA.GLYOX.BYPASS..superpathway.of.glyoxylate.bypass.and.TCA	mode_of_delivery	Vaginal	-0.00203519	0.00203519	0.000798726	252	205	0.0114395	0.0817105
PWY-8187..L.arginine.degradation.XIII..reductive.Stickland.reaction.	symptoms	AP	0.00182106	0.00182106	0.000715798	252	247	0.0115659	0.0820478
PWY-.1586..peptidoglycan.maturation..meso.diaminopimelate.containing.	mode_of_delivery	Vaginal	-0.00240242	0.00240242	0.000944507	252	252	0.0115832	0.0820478
AEROBACTINSYN.PWY-.aerobactin.biosynthesis	symptoms	AP	0.001009	0.001009	0.000397068	252	43	0.0116627	0.0822678
P164.PWY-.purine.nucleobases.degradation.I..anaerobic.	symptoms	AP	-0.00180958	0.00180958	0.000713829	252	121	0.0118619	0.0826446
PWY-7118..chitin.deacetylation	visit_age_mo	visit_age_mo	-0.000812477	0.000812477	0.000320185	252	230	0.0117799	0.0826446
PWY-.1415..superpathway.of.heme.b.biosynthesis.from.uroporphyrinogen.III	visit_age_mo	visit_age_mo	-0.000879296	0.000879296	0.000346738	252	220	0.0118329	0.0826446
PWY-5136..fatty.acid..beta..oxidation.II..plant.peroxisome.	visit_age_mo	visit_age_mo	-0.000962976	0.000962976	0.000381501	252	236	0.0122247	0.0846189
PWY-6.409..superpathway.of.purine.nucleotide.salvage	probiotics_firstyr	probiotics_firstyr	0.000830169	0.000830169	0.000328964	252	241	0.0122448	0.0846189
PWY-7220..adenosine.deoxyribonucleotides.de.novo.biosynthesis.II	probiotics_firstyr	probiotics_firstyr	0.000953835	0.000953835	0.000380086	252	252	0.0127302	0.0872637
PWY-7222..guanosine.deoxyribonucleotides.de.novo.biosynthesis.II	probiotics_firstyr	probiotics_firstyr	0.000953835	0.000953835	0.000380086	252	252	0.0127302	0.0872637
ALLANTOINDEG.PWY-.superpathway.of.allantoin.degradation.in.yeast	mode_of_delivery	Vaginal	-0.000483473	0.000483473	0.00019333	252	41	0.0130411	0.0889414
PWY-6125..superpathway.of.guanosine.nucleotides.de.novo.biosynthesis.II	probiotics_firstyr	probiotics_firstyr	0.000965103	0.000965103	0.000386088	252	250	0.0130796	0.0889414
CATECHOL.ORTHO.CLEAVAGE.PWY-.catechol.degradation.to..beta..ketoadipate	symptoms	AP	-0.00118732	0.00118732	0.000475591	252	75	0.0131943	0.089009
PWY-7228..superpathway.of.guanosine.nucleotides.de.novo.biosynthesis.I	probiotics_firstyr	probiotics_firstyr	0.000980916	0.000980916	0.000392871	252	250	0.0131848	0.089009
PWY-5028..L.histidine.degradation.II	mode_of_delivery	Vaginal	-0.0012571	0.0012571	0.000504759	252	93	0.0134144	0.0901366
P4.PWY-.superpathway.of.L.lysine..L.threonine.and.L.methionine.biosynthesis.I	mode_of_delivery	Vaginal	-0.00175727	0.00175727	0.000706662	252	235	0.013554	0.090716
PWY-8011..L.serine.biosynthesis.II	visit_age_mo	visit_age_mo	-9.09294e-05	9.09294e-05	3.6607e-05	252	14	0.0136578	0.0910519
GLYCOL.GLYOXDEG.PWY-.superpathway.of.glycol.metabolism.and.degradation	symptoms	AP	0.00111322	0.00111322	0.000448788	252	161	0.0137872	0.0911992
PWY-6147..6.hydroxymethyl.dihydropterin.diphosphate.biosynthesis.I	mode_of_delivery	Vaginal	0.00175363	0.00175363	0.000706784	252	251	0.0137627	0.0911992
PWY-.166..superpathway.of.pyrimidine.deoxyribonucleotides.de.novo.biosynthesis..E..coli.	visit_age_mo	visit_age_mo	-0.000716552	0.000716552	0.000289452	252	230	0.0139746	0.092081
GLUCONEO.PWY-.gluconeogenesis.I	visit_age_mo	visit_age_mo	-0.000601639	0.000601639	0.000243371	252	249	0.0141068	0.0925931
DARABCATK12.PWY-.D.arabinose.degradation.I	mode_of_delivery	Vaginal	-0.00102212	0.00102212	0.000415041	252	161	0.0144728	0.0946297
HOMOSER.METSYN.PWY-.L.methionine.biosynthesis.I	mode_of_delivery	Vaginal	-0.00167219	0.00167219	0.00068085	252	239	0.0147376	0.0959918
PWY-2941..L.lysine.biosynthesis.II	symptoms	AP	-0.00167621	0.00167621	0.000683487	252	249	0.0148815	0.0962929
PWY-6609..adenine.and.adenosine.salvage.III	symptoms	AP	-0.00153961	0.00153961	0.000627883	252	252	0.0148971	0.0962929
AST.PWY-.L.arginine.degradation.II..AST.pathway.	visit_age_mo	visit_age_mo	-0.000699812	0.000699812	0.000285703	252	218	0.0150034	0.0966127
PWY-5910..superpathway.of.geranylgeranyldiphosphate.biosynthesis.I..via.mevalonate.	mode_of_delivery	Vaginal	-0.000832136	0.000832136	0.000340486	252	113	0.0152273	0.0976843
TCA..TCA.cycle.I..prokaryotic.	mode_of_delivery	Vaginal	-0.00199291	0.00199291	0.000816866	252	207	0.015404	0.0984463
COBALSYN.PWY-.superpathway.of.adenosylcobalamin.salvage.from.cobinamide.I	mode_of_delivery	Vaginal	-0.00153256	0.00153256	0.000629825	252	238	0.0156716	0.0997814
HISDEG.PWY-.L.histidine.degradation.I	mode_of_delivery	Vaginal	0.00212504	0.00212504	0.000875729	252	225	0.0159579	0.100875
PWY-7446..sulfoquinovose.degradation.I	probiotics_firstyr	probiotics_firstyr	0.000605762	0.000605762	0.000249645	252	97	0.0159619	0.100875
PWY-.461..L.lysine.degradation.I	symptoms	AP	0.00107333	0.00107333	0.000443369	252	139	0.0162064	0.10204
PWY-6284..superpathway.of.unsaturated.fatty.acids.biosynthesis..E..coli.	mode_of_delivery	Vaginal	-0.0017276	0.0017276	0.000721058	252	207	0.0173237	0.108673
PWY-5104..L.isoleucine.biosynthesis.IV	mode_of_delivery	Vaginal	0.0010973	0.0010973	0.000458625	252	88	0.0174784	0.10924
METSYN.PWY-.superpathway.of.L.homoserine.and.L.methionine.biosynthesis	mode_of_delivery	Vaginal	-0.00176653	0.00176653	0.000738882	252	239	0.0175609	0.109354
PWY-5850..superpathway.of.menaquinol.6.biosynthesis	mode_of_delivery	Vaginal	-0.00167826	0.00167826	0.000703371	252	212	0.0177854	0.109848
PWY-5896..superpathway.of.menaquinol.10.biosynthesis	mode_of_delivery	Vaginal	-0.00167826	0.00167826	0.000703371	252	212	0.0177854	0.109848
PWY-.1296..purine.ribonucleosides.degradation	probiotics_firstyr	probiotics_firstyr	0.000893538	0.000893538	0.000374649	252	252	0.0178342	0.109848
PWY-5384..sucrose.degradation.IV..sucrose.phosphorylase.	mode_of_delivery	Vaginal	-0.00181784	0.00181784	0.000763655	252	251	0.0180508	0.110781
P41.PWY-.pyruvate.fermentation.to.acetate.and..S..lactate.I	mode_of_delivery	Vaginal	-0.00194536	0.00194536	0.000818185	252	250	0.0181849	0.111203	P41-PWY	SCFA
PWY-6961..L.ascorbate.degradation.II..bacterial..aerobic.	mode_of_delivery	Vaginal	-0.00178574	0.00178574	0.000751625	252	214	0.0182725	0.111292
PWY-6969..TCA.cycle.V..2.oxoglutarate.synthase.	mode_of_delivery	Vaginal	-0.00173205	0.00173205	0.00072939	252	224	0.0183304	0.111292
PWY-2941..L.lysine.biosynthesis.II	probiotics_firstyr	probiotics_firstyr	0.000803528	0.000803528	0.000339473	252	249	0.0187053	0.111969
PWY-5265..peptidoglycan.biosynthesis.II..staphylococci.	probiotics_firstyr	probiotics_firstyr	0.00076739	0.00076739	0.000323886	252	138	0.0185905	0.111969
PWY-5862..superpathway.of.demethylmenaquinol.9.biosynthesis	mode_of_delivery	Vaginal	-0.00153026	0.00153026	0.000646375	252	221	0.0186823	0.111969
PWY-7237..myo...chiro..and.scyllo.inositol.degradation	mode_of_delivery	Vaginal	-0.00293336	0.00293336	0.001238	252	168	0.0185852	0.111969
PWY-.1338..polymyxin.resistance	mode_of_delivery	Vaginal	-0.00140284	0.00140284	0.00059314	252	209	0.0187985	0.112132
PWY-5005..biotin.biosynthesis.II	mode_of_delivery	Vaginal	-0.00136101	0.00136101	0.000577795	252	150	0.0192789	0.114595
ALLANTOINDEG.PWY-.superpathway.of.allantoin.degradation.in.yeast	symptoms	AP	-0.000491439	0.000491439	0.00020892	252	41	0.0194443	0.115175
PWY-841..superpathway.of.purine.nucleotides.de.novo.biosynthesis.I	probiotics_firstyr	probiotics_firstyr	0.000768935	0.000768935	0.000328045	252	250	0.0198719	0.117299
KETOGLUCONMET.PWY-.ketogluconate.metabolism	symptoms	AP	0.00200747	0.00200747	0.000858367	252	193	0.0201487	0.118113
PWY-I9..L.cysteine.biosynthesis.VI..from.L.methionine.	mode_of_delivery	Vaginal	-0.0017051	0.0017051	0.000728676	252	252	0.0200807	0.118113
DARABCATK12.PWY-.D.arabinose.degradation.I	symptoms	AP	0.00104555	0.00104555	0.000448511	252	161	0.0205502	0.120053
GLYOXYLATE.BYPASS..glyoxylate.cycle	visit_age_mo	visit_age_mo	-0.000757394	0.000757394	0.000325377	252	228	0.0207343	0.120714
PWY-5840..superpathway.of.menaquinol.7.biosynthesis	mode_of_delivery	Vaginal	-0.0014097	0.0014097	0.000606506	252	232	0.0209216	0.121196
PWY-.461..L.lysine.degradation.I	mode_of_delivery	Vaginal	-0.00095333	0.00095333	0.000410283	252	139	0.0209598	0.121196
PWY-6126..superpathway.of.adenosine.nucleotides.de.novo.biosynthesis.II	probiotics_firstyr	probiotics_firstyr	0.000816286	0.000816286	0.000352731	252	252	0.0214785	0.123775
MET.SAM.PWY-.superpathway.of.S.adenosyl.L.methionine.biosynthesis	mode_of_delivery	Vaginal	-0.00164548	0.00164548	0.000711633	252	239	0.0215863	0.123778
THISYNARA.PWY-.superpathway.of.thiamine.diphosphate.biosynthesis.III..eukaryotes.	mode_of_delivery	Vaginal	0.00158077	0.00158077	0.00068385	252	241	0.0216247	0.123778
PWY-4984..urea.cycle	mode_of_delivery	Vaginal	0.00165547	0.00165547	0.000717876	252	158	0.021936	0.12472
PWY-5994..palmitate.biosynthesis..type.I.fatty.acid.synthase.	mode_of_delivery	Vaginal	0.000983138	0.000983138	0.000426152	252	62	0.021882	0.12472
PWY-8086...S..lactate.fermentation.to.propanoate..acetate.and.hydrogen	visit_age_mo	visit_age_mo	0.000155116	0.000155116	6.75043e-05	252	25	0.0224056	0.126965	PWY-8086	SCFA
PWY-7873..D.erythronate.degradation.II	symptoms	AP	0.000672277	0.000672277	0.000293397	252	73	0.022785	0.128686
P108.PWY-.pyruvate.fermentation.to.propanoate.I	symptoms	AP	-0.00143241	0.00143241	0.000625741	252	161	0.0229155	0.128994	P108-PWY	SCFA
PWY-7115..C4.photosynthetic.carbon.assimilation.cycle..NAD.ME.type	visit_age_mo	visit_age_mo	-0.000666831	0.000666831	0.000292039	252	243	0.0232591	0.130496
PWY-5417..catechol.degradation.III..ortho.cleavage.pathway.	symptoms	AP	-0.0012125	0.0012125	0.000531835	252	73	0.0234698	0.130815
PWY-5431..aromatic.compounds.degradation.via..beta..ketoadipate	symptoms	AP	-0.0012125	0.0012125	0.000531835	252	73	0.0234698	0.130815
AEROBACTINSYN.PWY-.aerobactin.biosynthesis	probiotics_firstyr	probiotics_firstyr	-0.000448689	0.000448689	0.000197215	252	43	0.023756	0.131616
ORNDEG.PWY-.superpathway.of.ornithine.degradation	mode_of_delivery	Vaginal	-0.00183001	0.00183001	0.000804429	252	226	0.0237683	0.131616
PWY-6284..superpathway.of.unsaturated.fatty.acids.biosynthesis..E..coli.	visit_age_mo	visit_age_mo	-0.000769279	0.000769279	0.000338695	252	207	0.0239895	0.13241
HEME.BIOSYNTHESIS.II.1..heme.b.biosynthesis.V..aerobic.	mode_of_delivery	Vaginal	-0.00156587	0.00156587	0.000691706	252	237	0.0244557	0.134112
THISYNARA.PWY-.superpathway.of.thiamine.diphosphate.biosynthesis.III..eukaryotes.	visit_age_mo	visit_age_mo	0.000727401	0.000727401	0.000321217	252	241	0.0244099	0.134112
DTDPRHAMSYN.PWY-.dTDP..beta..L.rhamnose.biosynthesis	visit_age_mo	visit_age_mo	0.00101961	0.00101961	0.000451409	252	252	0.0247735	0.134984
PWY-5347..superpathway.of.L.methionine.biosynthesis..transsulfuration.	mode_of_delivery	Vaginal	-0.00168725	0.00168725	0.000746807	252	239	0.0247375	0.134984
KDO.NAGLIPASYN.PWY-.superpathway.of..Kdo.2.lipid.A.biosynthesis	symptoms	AP	0.00109358	0.00109358	0.000485962	252	162	0.0253073	0.136579
PWY-5840..superpathway.of.menaquinol.7.biosynthesis	visit_age_mo	visit_age_mo	-0.000641345	0.000641345	0.000284887	252	232	0.0252512	0.136579
PWY-6519..8.amino.7.oxononanoate.biosynthesis.I	visit_age_mo	visit_age_mo	-0.00075283	0.00075283	0.000334216	252	241	0.0251678	0.136579
PWY-6527..stachyose.degradation	symptoms	AP	0.00144072	0.00144072	0.000641527	252	249	0.0256037	0.137741
PWY-7245..superpathway.of.NAD.NADP...NADH.NADPH.interconversion..yeast.	mode_of_delivery	Vaginal	-0.00065869	0.00065869	0.000293494	252	29	0.0256986	0.137816
CARNMET.PWY-.L.carnitine.degradation.I	symptoms	AP	0.000926059	0.000926059	0.000413297	252	149	0.0259374	0.138659
GLYCOLYSIS.TCA.GLYOX.BYPASS..superpathway.of.glycolysis..pyruvate.dehydrogenase..TCA..and.glyoxylate.bypass	visit_age_mo	visit_age_mo	-0.000648102	0.000648102	0.000290968	252	153	0.0268221	0.139442
P461.PWY-.hexitol.fermentation.to.lactate..formate..ethanol.and.acetate	mode_of_delivery	Vaginal	-0.00163655	0.00163655	0.000734495	252	242	0.0267725	0.139442	P461-PWY	SCFA
P461.PWY-.hexitol.fermentation.to.lactate..formate..ethanol.and.acetate	visit_age_mo	visit_age_mo	-0.00077053	0.00077053	0.000345006	252	242	0.0264199	0.139442	P461-PWY	SCFA
PWY-5367..petroselinate.biosynthesis	visit_age_mo	visit_age_mo	-0.000552447	0.000552447	0.000247293	252	207	0.0263802	0.139442
PWY-6435..4.hydroxybenzoate.biosynthesis.III..plants.	probiotics_firstyr	probiotics_firstyr	-0.000280081	0.000280081	0.000125608	252	22	0.0266599	0.139442
PWY-6549..L.glutamine.biosynthesis.III	symptoms	AP	-0.00118053	0.00118053	0.000528444	252	125	0.0263804	0.139442
PWY-702..L.methionine.biosynthesis.II	visit_age_mo	visit_age_mo	-0.000801558	0.000801558	0.000359661	252	252	0.0267378	0.139442
PWY-724..superpathway.of.L.lysine..L.threonine.and.L.methionine.biosynthesis.II	mode_of_delivery	Vaginal	-0.00111935	0.00111935	0.000501635	252	252	0.0265524	0.139442
PWY-7874..L.threonate.degradation	symptoms	AP	0.000717518	0.000717518	0.000321164	252	113	0.0263707	0.139442
PWY-6549..L.glutamine.biosynthesis.III	mode_of_delivery	Vaginal	-0.00108742	0.00108742	0.000489009	252	125	0.0270724	0.140188
PWY-7204..pyridoxal.5..phosphate.salvage.II..plants.	visit_age_mo	visit_age_mo	-0.000669368	0.000669368	0.000301128	252	187	0.0271304	0.140188
PWY-7316..dTDP.N.acetylviosamine.biosynthesis	probiotics_firstyr	probiotics_firstyr	0.000683602	0.000683602	0.000309689	252	32	0.0282072	0.14531
PWY-.1586..peptidoglycan.maturation..meso.diaminopimelate.containing.	visit_age_mo	visit_age_mo	-0.000978039	0.000978039	0.000443653	252	252	0.0284107	0.145916
PWY-6182..superpathway.of.salicylate.degradation	symptoms	AP	-0.000887989	0.000887989	0.000404173	252	57	0.0289458	0.148216
PWY-5415..catechol.degradation.I..meta.cleavage.pathway.	visit_age_mo	visit_age_mo	-0.000248654	0.000248654	0.000113358	252	83	0.0292018	0.149078
P42.PWY-.incomplete.reductive.TCA.cycle	mode_of_delivery	Vaginal	-0.00119431	0.00119431	0.000545739	252	201	0.0295754	0.150521
PWY-6549..L.glutamine.biosynthesis.III	visit_age_mo	visit_age_mo	0.000502407	0.000502407	0.000229697	252	125	0.0296614	0.150521
POLYISOPRENSYN.PWY-.polyisoprenoid.biosynthesis..E..coli.	visit_age_mo	visit_age_mo	-0.000549304	0.000549304	0.000251872	252	245	0.0301355	0.152471
PWY-7115..C4.photosynthetic.carbon.assimilation.cycle..NAD.ME.type	mode_of_delivery	Vaginal	-0.00135385	0.00135385	0.000621732	252	243	0.0303863	0.153284
PWY-5861..superpathway.of.demethylmenaquinol.8.biosynthesis.I	visit_age_mo	visit_age_mo	-0.000615999	0.000615999	0.000283122	252	237	0.0305232	0.153316
PWY-6609..adenine.and.adenosine.salvage.III	probiotics_firstyr	probiotics_firstyr	0.000678055	0.000678055	0.000311856	252	252	0.0306353	0.153316
PWY-6961..L.ascorbate.degradation.II..bacterial..aerobic.	symptoms	AP	0.00176572	0.00176572	0.000812238	252	214	0.0306631	0.153316
ARG.POLYAMINE.SYN..superpathway.of.arginine.and.polyamine.biosynthesis	mode_of_delivery	Vaginal	-0.00164232	0.00164232	0.000757739	252	225	0.0311608	0.154441
ARGDEG.PWY-.superpathway.of.L.arginine..putrescine..and.4.aminobutanoate.degradation	visit_age_mo	visit_age_mo	0.000385992	0.000385992	0.000178038	252	42	0.031111	0.154441
ORNARGDEG.PWY-.superpathway.of.L.arginine.and.L.ornithine.degradation	visit_age_mo	visit_age_mo	0.000385992	0.000385992	0.000178038	252	42	0.031111	0.154441
PWY-8004..Entner.Doudoroff.pathway.I	symptoms	AP	0.00137193	0.00137193	0.000633575	252	242	0.0313168	0.154763
P105.PWY-.TCA.cycle.IV..2.oxoglutarate.decarboxylase.	mode_of_delivery	Vaginal	-0.00156529	0.00156529	0.000723922	252	190	0.0315608	0.155517
PPGPPMET.PWY-.ppGpp.metabolism	symptoms	AP	-0.00171636	0.00171636	0.000794648	252	214	0.0317424	0.15596
PWY-7316..dTDP.N.acetylviosamine.biosynthesis	mode_of_delivery	Vaginal	0.0012438	0.0012438	0.000576991	252	32	0.0320755	0.157142
POLYAMSYN.PWY-.superpathway.of.polyamine.biosynthesis.I	mode_of_delivery	Vaginal	-0.0015635	0.0015635	0.000726194	252	226	0.0322868	0.157723
ECASYN.PWY-.enterobacterial.common.antigen.biosynthesis	visit_age_mo	visit_age_mo	-0.000599057	0.000599057	0.000279136	252	188	0.032839	0.159341
GALACTARDEG.PWY-.D.galactarate.degradation.I	mode_of_delivery	Vaginal	-0.00167595	0.00167595	0.000782462	252	232	0.0331803	0.159341
GLUCARGALACTSUPER.PWY-.superpathway.of.D.glucarate.and.D.galactarate.degradation	mode_of_delivery	Vaginal	-0.00167595	0.00167595	0.000782462	252	232	0.0331803	0.159341
PWY-5104..L.isoleucine.biosynthesis.IV	probiotics_firstyr	probiotics_firstyr	-0.000527556	0.000527556	0.000246158	252	88	0.0330778	0.159341
PWY-7210..pyrimidine.deoxyribonucleotides.biosynthesis.from.CTP	mode_of_delivery	Vaginal	-0.00180097	0.00180097	0.000839737	252	163	0.0329542	0.159341
PWY-.1261..anhydromuropeptides.recycling.I	mode_of_delivery	Vaginal	-0.00138025	0.00138025	0.000643353	252	239	0.0328963	0.159341
PWY-7198..pyrimidine.deoxyribonucleotides.de.novo.biosynthesis.IV	mode_of_delivery	Vaginal	-0.00162352	0.00162352	0.000758502	252	220	0.0332999	0.159464
PWY-7229..superpathway.of.adenosine.nucleotides.de.novo.biosynthesis.I	probiotics_firstyr	probiotics_firstyr	0.000715262	0.000715262	0.000335708	252	252	0.03411	0.162885
ARGDEG.PWY-.superpathway.of.L.arginine..putrescine..and.4.aminobutanoate.degradation	symptoms	AP	-0.000870947	0.000870947	0.000409596	252	42	0.0344656	0.163663
ORNARGDEG.PWY-.superpathway.of.L.arginine.and.L.ornithine.degradation	symptoms	AP	-0.000870947	0.000870947	0.000409596	252	42	0.0344656	0.163663
PWY-5676..acetyl.CoA.fermentation.to.butanoate.II	visit_age_mo	visit_age_mo	0.000570484	0.000570484	0.000269367	252	181	0.035185	0.166267	PWY-5676	SCFA
PWY-.1338..polymyxin.resistance	visit_age_mo	visit_age_mo	-0.000589979	0.000589979	0.000278609	252	209	0.0352096	0.166267
HEXITOLDEGSUPER.PWY-.superpathway.of.hexitol.degradation..bacteria.	probiotics_firstyr	probiotics_firstyr	-0.000978664	0.000978664	0.000463375	252	163	0.0356876	0.168058
FERMENTATION.PWY-.mixed.acid.fermentation	mode_of_delivery	Vaginal	-0.00163087	0.00163087	0.000774864	252	241	0.0363261	0.170592	FERMENTATION-PWY	SCFA
GLUCARDEG.PWY-.D.glucarate.degradation.I	visit_age_mo	visit_age_mo	-0.000639107	0.000639107	0.00030427	252	229	0.0367027	0.171414
PWY-7392..taxadiene.biosynthesis..engineered.	visit_age_mo	visit_age_mo	0.00070594	0.00070594	0.000336074	252	192	0.0366946	0.171414
PWY-7315..dTDP.N.acetylthomosamine.biosynthesis	visit_age_mo	visit_age_mo	-0.000601537	0.000601537	0.000288067	252	228	0.0378056	0.176081
PWY-5188..tetrapyrrole.biosynthesis.I..from.glutamate.	visit_age_mo	visit_age_mo	-0.000648964	0.000648964	0.000311354	252	249	0.0381581	0.177237
PWY-5675..nitrate.reduction.V..assimilatory.	visit_age_mo	visit_age_mo	-0.000700657	0.000700657	0.000336702	252	227	0.0384697	0.178198
PWY-6628..superpathway.of.L.phenylalanine.biosynthesis	mode_of_delivery	Vaginal	-0.00125649	0.00125649	0.000605094	252	248	0.0388797	0.179607
PWY-6305..superpathway.of.putrescine.biosynthesis	mode_of_delivery	Vaginal	-0.00146724	0.00146724	0.000709798	252	239	0.0397643	0.182723
PWY-6590..superpathway.of.Clostridium.acetobutylicum.acidogenic.fermentation	visit_age_mo	visit_age_mo	0.000415904	0.000415904	0.000201204	252	89	0.0397692	0.182723
PWY-5971..palmitate.biosynthesis..type.II.fatty.acid.synthase.	symptoms	AP	0.00210832	0.00210832	0.0010218	252	213	0.0401267	0.183484
PWY-.42..2.methylcitrate.cycle.I	symptoms	AP	0.00121398	0.00121398	0.000588434	252	162	0.0401506	0.183484
THREOCAT.PWY-.superpathway.of.L.threonine.metabolism	symptoms	AP	-0.00102012	0.00102012	0.000496625	252	79	0.0410181	0.186946
GLYOXYLATE.BYPASS..glyoxylate.cycle	mode_of_delivery	Vaginal	-0.00142061	0.00142061	0.000692706	252	228	0.0413405	0.187911
PWY-5973..cis.vaccenate.biosynthesis	symptoms	AP	-0.00126585	0.00126585	0.000619479	252	252	0.0420734	0.190733
PWY-2942..L.lysine.biosynthesis.III	symptoms	AP	-0.00193068	0.00193068	0.000948238	252	230	0.0428107	0.193559
LIPASYN.PWY-.phospholipases	visit_age_mo	visit_age_mo	-0.000757805	0.000757805	0.000372987	252	84	0.0432527	0.195039
PWY-6168..flavin.biosynthesis.III..fungi.	symptoms	AP	0.00173841	0.00173841	0.000856202	252	149	0.0433904	0.195142
PWY-6285..superpathway.of.fatty.acids.biosynthesis..E..coli.	visit_age_mo	visit_age_mo	-0.000764513	0.000764513	0.000378058	252	203	0.0442327	0.198405
PWY-6470..peptidoglycan.biosynthesis.V...beta..lactam.resistance.	symptoms	AP	-0.00100005	0.00100005	0.000495439	252	68	0.0446185	0.199609
P4.PWY-.superpathway.of.L.lysine..L.threonine.and.L.methionine.biosynthesis.I	visit_age_mo	visit_age_mo	-0.00066675	0.00066675	0.000331933	252	235	0.0456582	0.203724
PPGPPMET.PWY-.ppGpp.metabolism	probiotics_firstyr	probiotics_firstyr	0.000790893	0.000790893	0.000394684	252	214	0.0461768	0.205499
PWY-6435..4.hydroxybenzoate.biosynthesis.III..plants.	symptoms	AP	0.00050608	0.00050608	0.000252896	252	22	0.0464716	0.206271
P23.PWY-.reductive.TCA.cycle.I	visit_age_mo	visit_age_mo	-0.000185119	0.000185119	9.28751e-05	252	41	0.0473395	0.209576
GLYCOGENSYNTH.PWY-.glycogen.biosynthesis.I..from.ADP.D.Glucose.	mode_of_delivery	Vaginal	-0.00112549	0.00112549	0.000566143	252	252	0.0479165	0.211127
PANTOSYN.PWY-.superpathway.of.coenzyme.A.biosynthesis.I..bacteria.	visit_age_mo	visit_age_mo	0.000497066	0.000497066	0.000250059	252	252	0.0479382	0.211127
CENTFERM.PWY-.pyruvate.fermentation.to.butanoate	visit_age_mo	visit_age_mo	0.000358313	0.000358313	0.000181183	252	89	0.0490821	0.214991	CENTFERM-PWY	SCFA
PWY-6895..superpathway.of.thiamine.diphosphate.biosynthesis.II	probiotics_firstyr	probiotics_firstyr	-0.00075852	0.00075852	0.000383483	252	220	0.0490425	0.214991
REDCITCYC..TCA.cycle.VI..Helicobacter.	symptoms	AP	-0.00111713	0.00111713	0.000565165	252	142	0.049195	0.214991
HEXITOLDEGSUPER.PWY-.superpathway.of.hexitol.degradation..bacteria.	symptoms	AP	0.00183944	0.00183944	0.000932948	252	163	0.049766	0.216929
PWY-5415..catechol.degradation.I..meta.cleavage.pathway.	mode_of_delivery	Vaginal	-0.000475133	0.000475133	0.000241331	252	83	0.0500944	0.217802
PWY-5838..superpathway.of.menaquinol.8.biosynthesis.I	visit_age_mo	visit_age_mo	-0.000568353	0.000568353	0.000288899	252	237	0.050267	0.217995
PWY-7268..cytosolic.NADPH.production..yeast.	symptoms	AP	-0.000878277	0.000878277	0.000447524	252	34	0.0508238	0.219849
PWY-6.389..phytol.degradation	probiotics_firstyr	probiotics_firstyr	0.000590457	0.000590457	0.000301355	252	157	0.0511972	0.220902
DENOVOPURINE2.PWY-.superpathway.of.purine.nucleotides.de.novo.biosynthesis.II	mode_of_delivery	Vaginal	-0.00140714	0.00140714	0.000719946	252	226	0.0517692	0.222804
PENTOSE.P.PWY-.pentose.phosphate.pathway	visit_age_mo	visit_age_mo	-0.000450725	0.000450725	0.000230984	252	252	0.0521485	0.223266
PWY-5723..Rubisco.shunt	mode_of_delivery	Vaginal	-0.00165303	0.00165303	0.000847226	252	228	0.0521747	0.223266
PWY-5972..stearate.biosynthesis.I..animals.	visit_age_mo	visit_age_mo	0.000229641	0.000229641	0.000117746	252	80	0.0522705	0.223266
METHGLYUT.PWY-.superpathway.of.methylglyoxal.degradation	probiotics_firstyr	probiotics_firstyr	0.00046746	0.00046746	0.000239961	252	216	0.05254	0.223855
METH.ACETATE.PWY-.methanogenesis.from.acetate	visit_age_mo	visit_age_mo	0.000414347	0.000414347	0.000213442	252	55	0.0533641	0.226232	METH-ACETATE-PWY	Acetate
PWY-7117..C4.photosynthetic.carbon.assimilation.cycle..PEPCK.type	mode_of_delivery	Vaginal	-0.00141859	0.00141859	0.000730525	252	246	0.0532897	0.226232
PWY-5971..palmitate.biosynthesis..type.II.fatty.acid.synthase.	visit_age_mo	visit_age_mo	-0.000861678	0.000861678	0.000444144	252	213	0.0535073	0.226275
PWY-6121..5.aminoimidazole.ribonucleotide.biosynthesis.I	mode_of_delivery	Vaginal	-0.000921795	0.000921795	0.00047598	252	252	0.0539317	0.227503
PWY-5656..mannosylglycerate.biosynthesis.I	mode_of_delivery	Vaginal	0.00121504	0.00121504	0.000629536	252	151	0.0547449	0.230362
FUCCAT.PWY-.fucose.degradation	mode_of_delivery	Vaginal	-0.00134077	0.00134077	0.000695462	252	231	0.0550163	0.230933
PWY-6859..all.trans.farnesol.biosynthesis	mode_of_delivery	Vaginal	-0.000933127	0.000933127	0.000485466	252	237	0.05574	0.233394
PWY-.1477..ethanolamine.utilization	visit_age_mo	visit_age_mo	-0.000869682	0.000869682	0.000454804	252	247	0.0570058	0.238108
PROTOCATECHUATE.ORTHO.CLEAVAGE.PWY-.protocatechuate.degradation.II..ortho.cleavage.pathway.	symptoms	AP	-0.00102789	0.00102789	0.000539745	252	106	0.0580206	0.241752
PWY-2941..L.lysine.biosynthesis.II	mode_of_delivery	Vaginal	0.00120337	0.00120337	0.000632482	252	249	0.0582542	0.242132
PWY-6906..chitin.derivatives.degradation	probiotics_firstyr	probiotics_firstyr	-0.000558901	0.000558901	0.000293958	252	51	0.0584273	0.242259
GALACTITOLCAT.PWY-.galactitol.degradation	symptoms	AP	0.00158915	0.00158915	0.000836593	252	168	0.0586571	0.242621
PWY-6285..superpathway.of.fatty.acids.biosynthesis..E..coli.	mode_of_delivery	Vaginal	-0.00152749	0.00152749	0.000804861	252	203	0.0588836	0.242966
SO4ASSIM.PWY-.assimilatory.sulfate.reduction.I	mode_of_delivery	Vaginal	-0.00134936	0.00134936	0.000712154	252	243	0.059292	0.244059
GOLPDLCAT.PWY-.superpathway.of.glycerol.degradation.to.1.3.propanediol	probiotics_firstyr	probiotics_firstyr	0.000588698	0.000588698	0.000311247	252	174	0.0597386	0.24505
PWY-7409..phospholipid.remodeling..phosphatidylethanolamine..yeast.	symptoms	AP	0.000952899	0.000952899	0.000503965	252	117	0.0598209	0.24505
DENITRIFICATION.PWY-.nitrate.reduction.I..denitrification.	probiotics_firstyr	probiotics_firstyr	0.000189107	0.000189107	0.000100091	252	34	0.0600148	0.245253
ALLANTOINDEG.PWY-.superpathway.of.allantoin.degradation.in.yeast	probiotics_firstyr	probiotics_firstyr	0.000195747	0.000195747	0.000103766	252	41	0.0604116	0.245693
PWY-6823..molybdopterin.biosynthesis	symptoms	AP	-0.00122266	0.00122266	0.000647963	252	249	0.0603431	0.245693
PWY-5265..peptidoglycan.biosynthesis.II..staphylococci.	mode_of_delivery	Vaginal	-0.00113451	0.00113451	0.000603442	252	138	0.0612766	0.24759
PWY-5860..superpathway.of.demethylmenaquinol.6.biosynthesis.I	visit_age_mo	visit_age_mo	-0.000598731	0.000598731	0.000318511	252	212	0.061315	0.24759
PWY-7723..bacterial.bioluminescence	mode_of_delivery	Vaginal	-0.000295956	0.000295956	0.000157273	252	31	0.0610383	0.24759

## Sheet: First resolved
feature	metadata	value	coef	absolute coef	stderr	N	N.not.0	pval	qval	Pathway.ID	SCFA-association
PWY-5855..ubiquinol.7.biosynthesis..early.decarboxylation.	visit_age_mo	visit_age_mo	-0.00113911	0.00113911	0.000178437	230	170	9.75566e-10	8.46792e-07
PWY-7094..fatty.acid.salvage	visit_age_mo	visit_age_mo	-0.00136393	0.00136393	0.000212687	230	156	8.3052e-10	8.46792e-07
PWY-.1337..oleate..beta..oxidation	visit_age_mo	visit_age_mo	-0.00134943	0.00134943	0.000217185	230	154	2.48435e-09	1.43761e-06
PWY-7456...beta...1.4..mannan.degradation	visit_age_mo	visit_age_mo	0.00160682	0.00160682	0.000267231	230	118	7.2969e-09	3.16686e-06
PWY-.301..L.ascorbate.degradation.I..bacterial..anaerobic.	visit_age_mo	visit_age_mo	-0.00165196	0.00165196	0.000283173	230	217	1.8726e-08	6.50166e-06
PWY-5138..fatty.acid..beta..oxidation.IV..unsaturated..even.number.	visit_age_mo	visit_age_mo	-0.00136292	0.00136292	0.000237635	230	192	3.11631e-08	9.01653e-06
PWY-7858...5Z..dodecenoate.biosynthesis.II	visit_age_mo	visit_age_mo	-0.00150628	0.00150628	0.000265101	230	195	4.09903e-08	1.01656e-05
NAD.BIOSYNTHESIS.II..NAD.salvage.pathway.III..to.nicotinamide.riboside.	visit_age_mo	visit_age_mo	-0.000960152	0.000960152	0.000172574	230	193	7.46962e-08	1.62091e-05
PWY-5505..L.glutamate.and.L.glutamine.biosynthesis	visit_age_mo	visit_age_mo	0.00100685	0.00100685	0.000184046	230	154	1.19051e-07	2.29635e-05
PWY-7315..dTDP.N.acetylthomosamine.biosynthesis	visit_age_mo	visit_age_mo	-0.00127401	0.00127401	0.000233951	230	194	1.34814e-07	2.34036e-05
PWY-4041...gamma..glutamyl.cycle	visit_age_mo	visit_age_mo	-0.00161439	0.00161439	0.000311698	230	229	4.93897e-07	7.79459e-05
PWY-7187..pyrimidine.deoxyribonucleotides.de.novo.biosynthesis.II	visit_age_mo	visit_age_mo	-0.00114947	0.00114947	0.000227727	230	187	9.22804e-07	0.000133499
DENOVOPURINE2.PWY-.superpathway.of.purine.nucleotides.de.novo.biosynthesis.II	visit_age_mo	visit_age_mo	-0.00141183	0.00141183	0.000284588	230	191	1.38289e-06	0.000152172
FAO.PWY-.fatty.acid..beta..oxidation.I..generic.	visit_age_mo	visit_age_mo	-0.00161154	0.00161154	0.000324124	230	198	1.31372e-06	0.000152172
PWY-.1061..superpathway.of.L.alanine.biosynthesis	visit_age_mo	visit_age_mo	-0.00178382	0.00178382	0.000357975	230	228	1.24772e-06	0.000152172
PWY-.1338..polymyxin.resistance	visit_age_mo	visit_age_mo	-0.00107914	0.00107914	0.000217659	230	177	1.4025e-06	0.000152172
P4.PWY-.superpathway.of.L.lysine..L.threonine.and.L.methionine.biosynthesis.I	visit_age_mo	visit_age_mo	-0.00158462	0.00158462	0.000324761	230	208	2.01477e-06	0.000205743
PWY-6185..4.methylcatechol.degradation..ortho.cleavage.	visit_age_mo	visit_age_mo	-0.000611273	0.000611273	0.000126707	230	55	2.58994e-06	0.000249785
PRPP.PWY-.superpathway.of.histidine..purine..and.pyrimidine.biosynthesis	visit_age_mo	visit_age_mo	-0.00140368	0.00140368	0.000291711	230	187	2.74026e-06	0.000250373
AST.PWY-.L.arginine.degradation.II..AST.pathway.	visit_age_mo	visit_age_mo	-0.00113966	0.00113966	0.000237451	230	184	2.89748e-06	0.000251501
ECASYN.PWY-.enterobacterial.common.antigen.biosynthesis	visit_age_mo	visit_age_mo	-0.000892791	0.000892791	0.000187853	230	148	3.58166e-06	0.000296084
PWY-5347..superpathway.of.L.methionine.biosynthesis..transsulfuration.	visit_age_mo	visit_age_mo	-0.00162584	0.00162584	0.000342975	230	213	3.78316e-06	0.000298526
METSYN.PWY-.superpathway.of.L.homoserine.and.L.methionine.biosynthesis	visit_age_mo	visit_age_mo	-0.0016009	0.0016009	0.000338597	230	213	3.99875e-06	0.000301818
HOMOSER.METSYN.PWY-.L.methionine.biosynthesis.I	visit_age_mo	visit_age_mo	-0.00142206	0.00142206	0.000302149	230	213	4.40311e-06	0.000318492
ECASYN.PWY-.enterobacterial.common.antigen.biosynthesis	mode_of_delivery	Vaginal	-0.00189244	0.00189244	0.000403442	230	148	4.72322e-06	0.000324523
PWY-6292..superpathway.of.L.cysteine.biosynthesis..mammalian.	visit_age_mo	visit_age_mo	0.00116376	0.00116376	0.000248541	230	163	4.90292e-06	0.000324523
PWY-7115..C4.photosynthetic.carbon.assimilation.cycle..NAD.ME.type	visit_age_mo	visit_age_mo	-0.0011006	0.0011006	0.000235381	230	223	5.04731e-06	0.000324523
MET.SAM.PWY-.superpathway.of.S.adenosyl.L.methionine.biosynthesis	visit_age_mo	visit_age_mo	-0.00153758	0.00153758	0.000329881	230	213	5.38956e-06	0.000334152
P161.PWY-.acetylene.degradation..anaerobic.	mode_of_delivery	Vaginal	-0.00303825	0.00303825	0.00065598	230	222	6.13763e-06	0.000367411	P161-PWY	SCFA
PWY-5913..partial.TCA.cycle..obligate.autotrophs.	visit_age_mo	visit_age_mo	-0.00155573	0.00155573	0.000336469	230	213	6.3558e-06	0.000367789
PROTOCATECHUATE.ORTHO.CLEAVAGE.PWY-.protocatechuate.degradation.II..ortho.cleavage.pathway.	visit_age_mo	visit_age_mo	-0.000766365	0.000766365	0.000166916	230	70	7.32664e-06	0.00039747
PWY-.301..L.ascorbate.degradation.I..bacterial..anaerobic.	mode_of_delivery	Vaginal	-0.00279292	0.00279292	0.000608154	230	217	7.29028e-06	0.00039747
GLYCOLYSIS.TCA.GLYOX.BYPASS..superpathway.of.glycolysis..pyruvate.dehydrogenase..TCA..and.glyoxylate.bypass	mode_of_delivery	Vaginal	-0.00232768	0.00232768	0.000512507	230	111	9.0955e-06	0.000451137
PWY-5723..Rubisco.shunt	visit_age_mo	visit_age_mo	-0.00165104	0.00165104	0.000363099	230	207	8.8873e-06	0.000451137
RIBOSYN2.PWY-.flavin.biosynthesis.I..bacteria.and.plants.	visit_age_mo	visit_age_mo	0.00107382	0.00107382	0.000236222	230	227	8.93691e-06	0.000451137
PWY-6470..peptidoglycan.biosynthesis.V...beta..lactam.resistance.	visit_age_mo	visit_age_mo	0.00102352	0.00102352	0.000229743	230	117	1.32203e-05	0.00062028
PWY-.781..aspartate.superpathway	visit_age_mo	visit_age_mo	-0.00141676	0.00141676	0.000317771	230	207	1.303e-05	0.00062028
PWY-.1415..superpathway.of.heme.b.biosynthesis.from.uroporphyrinogen.III	visit_age_mo	visit_age_mo	-0.00116478	0.00116478	0.000263501	230	206	1.53268e-05	0.000700195
GLYCOLYSIS.TCA.GLYOX.BYPASS..superpathway.of.glycolysis..pyruvate.dehydrogenase..TCA..and.glyoxylate.bypass	visit_age_mo	visit_age_mo	-0.00103988	0.00103988	0.000238637	230	111	1.99975e-05	0.000890146
DAPLYSINESYN.PWY-.L.lysine.biosynthesis.I	visit_age_mo	visit_age_mo	-0.00146655	0.00146655	0.000339155	230	228	2.30119e-05	0.000998715
PWY-7269..mitochondrial.NADPH.production..yeast.	visit_age_mo	visit_age_mo	-0.000729502	0.000729502	0.000168965	230	102	2.36638e-05	0.00100196
PWY-6700..queuosine.biosynthesis.I..de.novo.	visit_age_mo	visit_age_mo	0.00109475	0.00109475	0.000256218	230	229	2.8512e-05	0.00109993
PWY-7118..chitin.deacetylation	visit_age_mo	visit_age_mo	-0.00124099	0.00124099	0.000290136	230	203	2.79775e-05	0.00109993
PWY-7942..5.oxo.L.proline.metabolism	mode_of_delivery	Vaginal	-0.00221002	0.00221002	0.000516241	230	174	2.75512e-05	0.00109993
REDCITCYC..TCA.cycle.VI..Helicobacter.	mode_of_delivery	Vaginal	-0.00186694	0.00186694	0.000435432	230	123	2.68089e-05	0.00109993
P105.PWY-.TCA.cycle.IV..2.oxoglutarate.decarboxylase.	visit_age_mo	visit_age_mo	-0.00126947	0.00126947	0.000298155	230	174	3.03357e-05	0.00112048
PWY-7883..anhydromuropeptides.recycling.II	visit_age_mo	visit_age_mo	-0.000891219	0.000891219	0.000209089	230	189	2.97573e-05	0.00112048
HEME.BIOSYNTHESIS.II.1..heme.b.biosynthesis.V..aerobic.	visit_age_mo	visit_age_mo	-0.00117151	0.00117151	0.000275954	230	213	3.19365e-05	0.00115504
PWY-.1297..superpathway.of.purine.deoxyribonucleosides.degradation	mode_of_delivery	Vaginal	-0.00259183	0.00259183	0.00061134	230	225	3.26993e-05	0.00115849
ORNDEG.PWY-.superpathway.of.ornithine.degradation	visit_age_mo	visit_age_mo	-0.0014875	0.0014875	0.000352977	230	198	3.63029e-05	0.00125504
PWY-2942..L.lysine.biosynthesis.III	visit_age_mo	visit_age_mo	0.0013611	0.0013611	0.000323528	230	226	3.73804e-05	0.00125504
TCA.GLYOX.BYPASS..superpathway.of.glyoxylate.bypass.and.TCA	visit_age_mo	visit_age_mo	-0.00142091	0.00142091	0.000337857	230	180	3.75933e-05	0.00125504
FERMENTATION.PWY-.mixed.acid.fermentation	visit_age_mo	visit_age_mo	-0.00145765	0.00145765	0.000347317	230	212	3.89663e-05	0.00127633	FERMENTATION-PWY	SCFA
HCAMHPDEG.PWY-.3.phenylpropanoate.and.3..3.hydroxyphenyl.propanoate.degradation.to.2.hydroxypentadienoate	mode_of_delivery	Vaginal	-0.00194588	0.00194588	0.000466028	230	135	4.2534e-05	0.00134253	HCAMHPDEG-PWY	Propiote
PWY-6690..cinnamate.and.3.hydroxycinnamate.degradation.to.2.hydroxypentadienoate	mode_of_delivery	Vaginal	-0.00194588	0.00194588	0.000466028	230	135	4.2534e-05	0.00134253
PWY-.1277..3.phenylpropanoate.and.3..3.hydroxyphenyl.propanoate.degradation	mode_of_delivery	Vaginal	-0.00216383	0.00216383	0.00051937	230	126	4.41536e-05	0.00136876
GLYCOLYSIS.TCA.GLYOX.BYPASS..superpathway.of.glycolysis..pyruvate.dehydrogenase..TCA..and.glyoxylate.bypass	probiotics_firstyr	probiotics_firstyr	-0.00132108	0.00132108	0.000318395	230	111	4.73264e-05	0.00144008
PWY-ZNC.1..assimilatory.sulfate.reduction.IV	mode_of_delivery	Vaginal	-0.00227794	0.00227794	0.000549547	230	203	4.81134e-05	0.00144008
METHGLYUT.PWY-.superpathway.of.methylglyoxal.degradation	visit_age_mo	visit_age_mo	-0.000738388	0.000738388	0.000178926	230	183	5.18219e-05	0.00152479
SO4ASSIM.PWY-.assimilatory.sulfate.reduction.I	visit_age_mo	visit_age_mo	-0.00128264	0.00128264	0.000312859	230	213	5.77833e-05	0.00164446
TCA..TCA.cycle.I..prokaryotic.	visit_age_mo	visit_age_mo	-0.0013966	0.0013966	0.000340388	230	184	5.70395e-05	0.00164446
GLYOXYLATE.BYPASS..glyoxylate.cycle	visit_age_mo	visit_age_mo	-0.00117601	0.00117601	0.000287373	230	208	5.95386e-05	0.00166708
PWY-561..superpathway.of.glyoxylate.cycle.and.fatty.acid.degradation	visit_age_mo	visit_age_mo	-0.00133071	0.00133071	0.000328676	230	183	7.08697e-05	0.00195285
PWY-.1337..oleate..beta..oxidation	mode_of_delivery	Vaginal	-0.00188035	0.00188035	0.000466435	230	154	7.59355e-05	0.00205975
NAD.BIOSYNTHESIS.II..NAD.salvage.pathway.III..to.nicotinamide.riboside.	mode_of_delivery	Vaginal	-0.00148946	0.00148946	0.000370628	230	193	7.98197e-05	0.00209371
PWY-5384..sucrose.degradation.IV..sucrose.phosphorylase.	visit_age_mo	visit_age_mo	-0.00139735	0.00139735	0.000347671	230	229	7.96791e-05	0.00209371
PWY-5676..acetyl.CoA.fermentation.to.butanoate.II	visit_age_mo	visit_age_mo	0.00105293	0.00105293	0.000262207	230	203	8.08057e-05	0.00209371	PWY-5676	SCFA
PWY-6590..superpathway.of.Clostridium.acetobutylicum.acidogenic.fermentation	visit_age_mo	visit_age_mo	0.000801579	0.000801579	0.000200379	230	160	8.58501e-05	0.0021917
THISYNARA.PWY-.superpathway.of.thiamine.diphosphate.biosynthesis.III..eukaryotes.	visit_age_mo	visit_age_mo	0.00117129	0.00117129	0.000293512	230	226	8.92014e-05	0.00224426
PWY-5138..fatty.acid..beta..oxidation.IV..unsaturated..even.number.	mode_of_delivery	Vaginal	-0.0020327	0.0020327	0.000510356	230	192	9.19392e-05	0.00228009
NONOXIPENT.PWY-.pentose.phosphate.pathway..non.oxidative.branch..I	mode_of_delivery	Vaginal	-0.00275999	0.00275999	0.000698555	230	229	0.000104183	0.00244407
P221.PWY-.octane.oxidation	mode_of_delivery	Vaginal	-0.00118297	0.00118297	0.000299088	230	95	0.000102462	0.00244407
PWY-5855..ubiquinol.7.biosynthesis..early.decarboxylation.	mode_of_delivery	Vaginal	-0.00151813	0.00151813	0.000383219	230	170	9.99816e-05	0.00244407
PWY-5855..ubiquinol.7.biosynthesis..early.decarboxylation.	probiotics_firstyr	probiotics_firstyr	-0.000940724	0.000940724	0.000238075	230	170	0.000104028	0.00244407
CENTFERM.PWY-.pyruvate.fermentation.to.butanoate	visit_age_mo	visit_age_mo	0.000707705	0.000707705	0.000179677	230	160	0.000109279	0.00252944	CENTFERM-PWY	SCFA
PWY-6876..isopropanol.biosynthesis..engineered.	visit_age_mo	visit_age_mo	0.000426747	0.000426747	0.000108972	230	79	0.00011934	0.00265607
PWY-7094..fatty.acid.salvage	mode_of_delivery	Vaginal	-0.00178908	0.00178908	0.000456775	230	156	0.000119041	0.00265607
PWY-7953..UDP.N.acetylmuramoyl.pentapeptide.biosynthesis.III..meso.diaminopimelate.containing.	visit_age_mo	visit_age_mo	0.000747153	0.000747153	0.000190724	230	229	0.00011872	0.00265607
PWY-.1338..polymyxin.resistance	mode_of_delivery	Vaginal	-0.0018249	0.0018249	0.000467455	230	177	0.000125111	0.00274928
P161.PWY-.acetylene.degradation..anaerobic.	visit_age_mo	visit_age_mo	-0.00118449	0.00118449	0.000305442	230	222	0.000138293	0.00296392	P161-PWY	SCFA
PWY-702..L.methionine.biosynthesis.II	visit_age_mo	visit_age_mo	-0.00142181	0.00142181	0.000366631	230	230	0.000138252	0.00296392
GLUCARDEG.PWY-.D.glucarate.degradation.I	visit_age_mo	visit_age_mo	-0.00104322	0.00104322	0.000269747	230	212	0.000144028	0.00304918
P221.PWY-.octane.oxidation	visit_age_mo	visit_age_mo	-0.000537067	0.000537067	0.000139263	230	95	0.000150192	0.00310396
UDPNAGSYN.PWY-.UDP.N.acetyl.D.glucosamine.biosynthesis.I	visit_age_mo	visit_age_mo	-0.00130399	0.00130399	0.000337864	230	230	0.00014846	0.00310396
FASYN.ELONG.PWY-.fatty.acid.elongation....saturated	visit_age_mo	visit_age_mo	-0.00102112	0.00102112	0.000267031	230	226	0.000170054	0.00344503
PWY-6961..L.ascorbate.degradation.II..bacterial..aerobic.	visit_age_mo	visit_age_mo	-0.00113762	0.00113762	0.000297568	230	196	0.000170664	0.00344503
PWY-7117..C4.photosynthetic.carbon.assimilation.cycle..PEPCK.type	visit_age_mo	visit_age_mo	-0.00116791	0.00116791	0.000305901	230	228	0.000174013	0.00347226
PWY-6282..palmitoleate.biosynthesis.I..from..5Z..dodec.5.enoate.	visit_age_mo	visit_age_mo	-0.00101544	0.00101544	0.000266807	230	226	0.000182169	0.00355331
PWY-821..superpathway.of.sulfur.amino.acid.biosynthesis..Saccharomyces.cerevisiae.	mode_of_delivery	Vaginal	-0.00227017	0.00227017	0.000596041	230	185	0.000180197	0.00355331
PWY-7269..mitochondrial.NADPH.production..yeast.	mode_of_delivery	Vaginal	-0.00137431	0.00137431	0.000362877	230	102	0.000195473	0.00377045
PWY-ZNC.1..assimilatory.sulfate.reduction.IV	visit_age_mo	visit_age_mo	-0.000968104	0.000968104	0.000255884	230	203	0.000198378	0.00378444
PWY-8190..L.glutamate.degradation.XI..reductive.Stickland.reaction.	mode_of_delivery	Vaginal	-0.000535504	0.000535504	0.000141716	230	35	0.000201891	0.0038096	PWY-8190	SCFA
PWY-5417..catechol.degradation.III..ortho.cleavage.pathway.	visit_age_mo	visit_age_mo	-0.000500348	0.000500348	0.000133701	230	54	0.000231539	0.00427608
PWY-5431..aromatic.compounds.degradation.via..beta..ketoadipate	visit_age_mo	visit_age_mo	-0.000500348	0.000500348	0.000133701	230	54	0.000231539	0.00427608
PWY-7664..oleate.biosynthesis.IV..anaerobic.	visit_age_mo	visit_age_mo	-0.000985828	0.000985828	0.000264209	230	226	0.000241303	0.0044095
FAO.PWY-.fatty.acid..beta..oxidation.I..generic.	mode_of_delivery	Vaginal	-0.00258756	0.00258756	0.000696102	230	198	0.000254277	0.00451801
PWY-6803..phosphatidylcholine.acyl.editing	visit_age_mo	visit_age_mo	-0.00105334	0.00105334	0.000283242	230	212	0.000252725	0.00451801
PWY-6876..isopropanol.biosynthesis..engineered.	symptoms	AP	0.00107952	0.00107952	0.00029069	230	79	0.000257652	0.00451801
PWY-8187..L.arginine.degradation.XIII..reductive.Stickland.reaction.	probiotics_firstyr	probiotics_firstyr	-0.00146062	0.00146062	0.000393163	230	224	0.000256339	0.00451801
CATECHOL.ORTHO.CLEAVAGE.PWY-.catechol.degradation.to..beta..ketoadipate	visit_age_mo	visit_age_mo	-0.000438926	0.000438926	0.00011915	230	55	0.000287849	0.00482788
PWY-6936..seleno.amino.acid.biosynthesis..plants.	mode_of_delivery	Vaginal	-0.00204777	0.00204777	0.000556046	230	229	0.000289003	0.00482788
PWY-7013...S..propane.1.2.diol.degradation	mode_of_delivery	Vaginal	-0.00289032	0.00289032	0.000784588	230	184	0.000287783	0.00482788	PWY-7013	SCFA
PWY-8178..pentose.phosphate.pathway..non.oxidative.branch..II	mode_of_delivery	Vaginal	-0.00243006	0.00243006	0.000659079	230	229	0.000284406	0.00482788
TRNA.CHARGING.PWY-.tRNA.charging	visit_age_mo	visit_age_mo	0.000643513	0.000643513	0.000174748	230	229	0.000289228	0.00482788
PWY-.1479..tRNA.processing	mode_of_delivery	Vaginal	-0.00238667	0.00238667	0.000649079	230	213	0.00029518	0.0048803
X3.HYDROXYPHENYLACETATE.DEGRADATION.PWY-.4.hydroxyphenylacetate.degradation	mode_of_delivery	Vaginal	-0.00119934	0.00119934	0.000326601	230	76	0.000300469	0.0049209	3-HYDROXYPHENYLACETATE-DEGRADATION-PWY	Acetate
PWY-7790..UMP.biosynthesis.II	visit_age_mo	visit_age_mo	0.000882197	0.000882197	0.000241724	230	229	0.000326538	0.00529785
PWY-7791..UMP.biosynthesis.III	visit_age_mo	visit_age_mo	0.000879712	0.000879712	0.000241289	230	229	0.000331036	0.0053211
PANTOSYN.PWY-.superpathway.of.coenzyme.A.biosynthesis.I..bacteria.	visit_age_mo	visit_age_mo	0.000919437	0.000919437	0.000253092	230	228	0.000347261	0.00533491
PWY-5022..4.aminobutanoate.degradation.V	visit_age_mo	visit_age_mo	0.000787708	0.000787708	0.000216423	230	137	0.000338654	0.00533491	PWY-5022	SCFA
PWY-.166..superpathway.of.pyrimidine.deoxyribonucleotides.de.novo.biosynthesis..E..coli.	visit_age_mo	visit_age_mo	-0.000963319	0.000963319	0.000264912	230	197	0.000342774	0.00533491
PWY-.862...5Z..dodecenoate.biosynthesis.I	visit_age_mo	visit_age_mo	-0.000934902	0.000934902	0.000257096	230	227	0.000342747	0.00533491
PWY-6.389..phytol.degradation	mode_of_delivery	Vaginal	-0.00159774	0.00159774	0.000439766	230	127	0.000346836	0.00533491
SULFATE.CYS.PWY-.superpathway.of.sulfate.assimilation.and.cysteine.biosynthesis	visit_age_mo	visit_age_mo	-0.00111411	0.00111411	0.000306899	230	213	0.000350571	0.00533852
FERMENTATION.PWY-.mixed.acid.fermentation	mode_of_delivery	Vaginal	-0.00269616	0.00269616	0.000745912	230	212	0.000371205	0.00560358	FERMENTATION-PWY	SCFA
PWY-.1297..superpathway.of.purine.deoxyribonucleosides.degradation	visit_age_mo	visit_age_mo	-0.00102405	0.00102405	0.000284656	230	225	0.000394988	0.00591119
PWY-7315..dTDP.N.acetylthomosamine.biosynthesis	mode_of_delivery	Vaginal	-0.00180605	0.00180605	0.000502442	230	194	0.00039928	0.00592435
FUC.RHAMCAT.PWY-.superpathway.of.fucose.and.rhamnose.degradation	visit_age_mo	visit_age_mo	-0.000945447	0.000945447	0.000264193	230	213	0.000422976	0.00618291
PWY-5030..L.histidine.degradation.III	mode_of_delivery	Vaginal	0.00346403	0.00346403	0.000968753	230	144	0.00042739	0.00618291
PWY-5136..fatty.acid..beta..oxidation.II..plant.peroxisome.	visit_age_mo	visit_age_mo	-0.00114273	0.00114273	0.000319439	230	225	0.000424989	0.00618291
PWY-6182..superpathway.of.salicylate.degradation	visit_age_mo	visit_age_mo	-0.0004091	0.0004091	0.000115473	230	40	0.000481232	0.00690428
PWY-5861..superpathway.of.demethylmenaquinol.8.biosynthesis.I	visit_age_mo	visit_age_mo	-0.000986743	0.000986743	0.000278793	230	203	0.000487301	0.00693405
POLYAMSYN.PWY-.superpathway.of.polyamine.biosynthesis.I	visit_age_mo	visit_age_mo	-0.00100202	0.00100202	0.000284698	230	214	0.000522994	0.00738145
PWY-6124..inosine.5..phosphate.biosynthesis.II	visit_age_mo	visit_age_mo	0.000759377	0.000759377	0.000216346	230	229	0.000541171	0.00757639
METHGLYUT.PWY-.superpathway.of.methylglyoxal.degradation	mode_of_delivery	Vaginal	-0.00134643	0.00134643	0.00038427	230	183	0.000553152	0.00768218
PPGPPMET.PWY-.ppGpp.metabolism	mode_of_delivery	Vaginal	-0.00180126	0.00180126	0.000515615	230	174	0.000574074	0.00784718
PWY-7858...5Z..dodecenoate.biosynthesis.II	mode_of_delivery	Vaginal	-0.00199021	0.00199021	0.000569342	230	195	0.00056957	0.00784718
PWY-7118..chitin.deacetylation	mode_of_delivery	Vaginal	-0.00217334	0.00217334	0.000623108	230	203	0.000585419	0.00793975
PWY-.1477..ethanolamine.utilization	mode_of_delivery	Vaginal	-0.00306756	0.00306756	0.000880132	230	228	0.000590745	0.00794988
AST.PWY-.L.arginine.degradation.II..AST.pathway.	mode_of_delivery	Vaginal	-0.00177408	0.00177408	0.000509959	230	184	0.000604446	0.00805183
PWY-.1298..superpathway.of.pyrimidine.deoxyribonucleosides.degradation	mode_of_delivery	Vaginal	-0.00196742	0.00196742	0.000565772	230	228	0.000607598	0.00805183
PWY-5837..2.carboxy.1.4.naphthoquinol.biosynthesis	visit_age_mo	visit_age_mo	-0.000824075	0.000824075	0.000238545	230	213	0.000658556	0.00862455
PWY-5981..CDP.diacylglycerol.biosynthesis.III	mode_of_delivery	Vaginal	-0.00176064	0.00176064	0.000509794	230	206	0.000660752	0.00862455
PWY-6961..L.ascorbate.degradation.II..bacterial..aerobic.	mode_of_delivery	Vaginal	-0.00219358	0.00219358	0.00063907	230	196	0.000711747	0.00922084
PWY-7942..5.oxo.L.proline.metabolism	visit_age_mo	visit_age_mo	-0.000824255	0.000824255	0.000240376	230	174	0.000720371	0.00926343
PWY-6.389..phytol.degradation	visit_age_mo	visit_age_mo	-0.000698847	0.000698847	0.000204767	230	127	0.000762128	0.00972834
HEXITOLDEGSUPER.PWY-.superpathway.of.hexitol.degradation..bacteria.	probiotics_firstyr	probiotics_firstyr	-0.00157947	0.00157947	0.000467364	230	179	0.000855762	0.0107079
PWY-5860..superpathway.of.demethylmenaquinol.6.biosynthesis.I	visit_age_mo	visit_age_mo	-0.000995952	0.000995952	0.000294748	230	175	0.000857375	0.0107079
PWY-.1477..ethanolamine.utilization	visit_age_mo	visit_age_mo	-0.00138492	0.00138492	0.000409813	230	228	0.00085616	0.0107079
PWY-5675..nitrate.reduction.V..assimilatory.	mode_of_delivery	Vaginal	-0.00236294	0.00236294	0.000704498	230	190	0.000934369	0.011504
PWY-7111..pyruvate.fermentation.to.isobutanol..engineered.	visit_age_mo	visit_age_mo	-0.00105004	0.00105004	0.000312919	230	230	0.000929427	0.011504
PWY-5838..superpathway.of.menaquinol.8.biosynthesis.I	visit_age_mo	visit_age_mo	-0.000978547	0.000978547	0.000292641	230	203	0.000967771	0.0117486
PWY-7187..pyrimidine.deoxyribonucleotides.de.novo.biosynthesis.II	mode_of_delivery	Vaginal	-0.00163638	0.00163638	0.000489075	230	187	0.000961089	0.0117486
PWY-7400..L.arginine.biosynthesis.IV..archaebacteria.	mode_of_delivery	Vaginal	-0.00198904	0.00198904	0.000597456	230	227	0.00101764	0.0122683
PWY-7977..L.methionine.biosynthesis.IV	visit_age_mo	visit_age_mo	0.00102858	0.00102858	0.00030972	230	226	0.00104653	0.0125295
PWY-3001..superpathway.of.L.isoleucine.biosynthesis.I	visit_age_mo	visit_age_mo	-0.000807992	0.000807992	0.000243999	230	230	0.0010811	0.0128547
PWY-6.399..gluconeogenesis.III	symptoms	AP	0.00237642	0.00237642	0.000718155	230	153	0.00108998	0.0128721
PWY-FS.7..phosphatidylglycerol.biosynthesis.I..plastidic.	mode_of_delivery	Vaginal	-0.00190009	0.00190009	0.000574993	230	228	0.00110687	0.0128993
PWY-FS.8..phosphatidylglycerol.biosynthesis.II..non.plastidic.	mode_of_delivery	Vaginal	-0.00190005	0.00190005	0.000574993	230	228	0.00110714	0.0128993
PWY-6897..thiamine.diphosphate.salvage.II	visit_age_mo	visit_age_mo	0.000657767	0.000657767	0.000199282	230	229	0.00112145	0.0129789
PWY-7204..pyridoxal.5..phosphate.salvage.II..plants.	mode_of_delivery	Vaginal	-0.00171528	0.00171528	0.000520742	230	176	0.00114754	0.0130475
PWY-.1298..superpathway.of.pyrimidine.deoxyribonucleosides.degradation	visit_age_mo	visit_age_mo	-0.000867853	0.000867853	0.000263438	230	228	0.00114593	0.0130475
PWY-.1337..oleate..beta..oxidation	probiotics_firstyr	probiotics_firstyr	-0.000954309	0.000954309	0.000289773	230	154	0.00114993	0.0130475
PWY-6731..starch.degradation.III	visit_age_mo	visit_age_mo	0.00105198	0.00105198	0.000320148	230	213	0.00117908	0.0132914
PWY-7094..fatty.acid.salvage	probiotics_firstyr	probiotics_firstyr	-0.000929389	0.000929389	0.000283772	230	156	0.00122287	0.0136961
PWY-.166..superpathway.of.pyrimidine.deoxyribonucleotides.de.novo.biosynthesis..E..coli.	mode_of_delivery	Vaginal	-0.00186103	0.00186103	0.000568936	230	197	0.00123972	0.0137959
PANTO.PWY-.phosphopantothenate.biosynthesis.I	visit_age_mo	visit_age_mo	0.000887386	0.000887386	0.000271654	230	229	0.00125858	0.0139165
PWY-5723..Rubisco.shunt	mode_of_delivery	Vaginal	-0.00254338	0.00254338	0.000779807	230	207	0.00128017	0.0139772
PWY-.461..L.lysine.degradation.I	visit_age_mo	visit_age_mo	-0.000568472	0.000568472	0.000174205	230	129	0.00127289	0.0139772
ARG.POLYAMINE.SYN..superpathway.of.arginine.and.polyamine.biosynthesis	mode_of_delivery	Vaginal	-0.00213672	0.00213672	0.000658437	230	214	0.00135275	0.0142326
PWY-5850..superpathway.of.menaquinol.6.biosynthesis	visit_age_mo	visit_age_mo	-0.00102676	0.00102676	0.000316113	230	175	0.00133943	0.0142326
PWY-5896..superpathway.of.menaquinol.10.biosynthesis	visit_age_mo	visit_age_mo	-0.00102676	0.00102676	0.000316113	230	175	0.00133943	0.0142326
PWY-5918..superpathway.of.heme.b.biosynthesis.from.glutamate	visit_age_mo	visit_age_mo	-0.000909487	0.000909487	0.000280015	230	206	0.00133985	0.0142326
PWY-6876..isopropanol.biosynthesis..engineered.	probiotics_firstyr	probiotics_firstyr	-0.000471857	0.000471857	0.000145393	230	79	0.00135162	0.0142326
PWY-.1296..purine.ribonucleosides.degradation	mode_of_delivery	Vaginal	-0.00217351	0.00217351	0.000669644	230	228	0.00134984	0.0142326
PWY-5897..superpathway.of.menaquinol.11.biosynthesis	visit_age_mo	visit_age_mo	-0.000889909	0.000889909	0.000275175	230	213	0.00140426	0.0145106
PWY-5898..superpathway.of.menaquinol.12.biosynthesis	visit_age_mo	visit_age_mo	-0.000889909	0.000889909	0.000275175	230	213	0.00140426	0.0145106
PWY-5899..superpathway.of.menaquinol.13.biosynthesis	visit_age_mo	visit_age_mo	-0.000889909	0.000889909	0.000275175	230	213	0.00140426	0.0145106
TCA.GLYOX.BYPASS..superpathway.of.glyoxylate.bypass.and.TCA	mode_of_delivery	Vaginal	-0.00234263	0.00234263	0.000725596	230	180	0.00142992	0.0146884
FUCCAT.PWY-.fucose.degradation	visit_age_mo	visit_age_mo	-0.000843474	0.000843474	0.000262461	230	219	0.00150249	0.0153418
PWY-.1479..tRNA.processing	visit_age_mo	visit_age_mo	-0.000970748	0.000970748	0.000302229	230	213	0.00151121	0.0153418
PWY-7199..pyrimidine.deoxyribonucleosides.salvage	visit_age_mo	visit_age_mo	0.000839564	0.000839564	0.000261636	230	229	0.0015267	0.015409
TCA..TCA.cycle.I..prokaryotic.	mode_of_delivery	Vaginal	-0.00234441	0.00234441	0.000731032	230	184	0.00153645	0.0154178
PWY-5188..tetrapyrrole.biosynthesis.I..from.glutamate.	mode_of_delivery	Vaginal	-0.00196958	0.00196958	0.000614966	230	227	0.00155821	0.0154574
PWY-7316..dTDP.N.acetylviosamine.biosynthesis	visit_age_mo	visit_age_mo	0.000888651	0.000888651	0.000277356	230	48	0.0015517	0.0154574
POLYAMSYN.PWY-.superpathway.of.polyamine.biosynthesis.I	mode_of_delivery	Vaginal	-0.0019485	0.0019485	0.000611428	230	214	0.00164274	0.0162034
GALACTITOLCAT.PWY-.galactitol.degradation	probiotics_firstyr	probiotics_firstyr	-0.00131723	0.00131723	0.00041374	230	182	0.00165966	0.0162778
CARNMET.PWY-.L.carnitine.degradation.I	visit_age_mo	visit_age_mo	-0.000459322	0.000459322	0.000144452	230	139	0.00168142	0.0163985
P441.PWY-.superpathway.of.N.acetylneuraminate.degradation	mode_of_delivery	Vaginal	-0.00185757	0.00185757	0.000585355	230	224	0.00171704	0.0166524
PWY-6185..4.methylcatechol.degradation..ortho.cleavage.	mode_of_delivery	Vaginal	-0.000861572	0.000861572	0.00027212	230	55	0.00175857	0.0169605
GLCMANNANAUT.PWY-.superpathway.of.N.acetylglucosamine..N.acetylmannosamine.and.N.acetylneuraminate.degradation	probiotics_firstyr	probiotics_firstyr	-0.000971302	0.000971302	0.000307939	230	228	0.00182889	0.0175412
PWY-6823..molybdopterin.biosynthesis	mode_of_delivery	Vaginal	-0.00187833	0.00187833	0.000596622	230	226	0.00186482	0.0177053
PWY-822..fructan.biosynthesis	symptoms	AP	-0.000620137	0.000620137	0.000196993	230	67	0.0018664	0.0177053
KDO.NAGLIPASYN.PWY-.superpathway.of..Kdo.2.lipid.A.biosynthesis	visit_age_mo	visit_age_mo	-0.00058807	0.00058807	0.000187292	230	142	0.00191683	0.0180848
P108.PWY-.pyruvate.fermentation.to.propanoate.I	mode_of_delivery	Vaginal	-0.00133351	0.00133351	0.000425082	230	163	0.00193448	0.0181528	P108-PWY	SCFA
ARG.POLYAMINE.SYN..superpathway.of.arginine.and.polyamine.biosynthesis	visit_age_mo	visit_age_mo	-0.000956449	0.000956449	0.000306586	230	214	0.00204724	0.0191076
PWY-5130..2.oxobutanoate.degradation.I	probiotics_firstyr	probiotics_firstyr	-0.000824566	0.000824566	0.000265796	230	191	0.00216635	0.0201112
PHOSLIPSYN.PWY-.superpathway.of.phospholipid.biosynthesis.I..bacteria.	mode_of_delivery	Vaginal	-0.00178531	0.00178531	0.000576357	230	228	0.00219935	0.0202015
PWY-LZ.257..superpathway.of.fermentation..Chlamydomonas.reinhardtii.	mode_of_delivery	Vaginal	-0.00190807	0.00190807	0.00061595	230	210	0.002198	0.0202015
LIPASYN.PWY-.phospholipases	mode_of_delivery	Vaginal	-0.00186871	0.00186871	0.000604257	230	63	0.00223524	0.020423
PWY-5028..L.histidine.degradation.II	visit_age_mo	visit_age_mo	-0.000496807	0.000496807	0.000160835	230	84	0.0022617	0.0205566
PWY-561..superpathway.of.glyoxylate.cycle.and.fatty.acid.degradation	mode_of_delivery	Vaginal	-0.00217192	0.00217192	0.000705878	230	183	0.00235095	0.0212565
P441.PWY-.superpathway.of.N.acetylneuraminate.degradation	visit_age_mo	visit_age_mo	-0.000834893	0.000834893	0.000272557	230	224	0.00245693	0.0220996
PWY-5920..superpathway.of.heme.b.biosynthesis.from.glycine	mode_of_delivery	Vaginal	-0.00160453	0.00160453	0.000524472	230	185	0.00248757	0.0222599
PROTOCATECHUATE.ORTHO.CLEAVAGE.PWY-.protocatechuate.degradation.II..ortho.cleavage.pathway.	mode_of_delivery	Vaginal	-0.00109238	0.00109238	0.000358476	230	70	0.00258504	0.0230135
SULFATE.CYS.PWY-.superpathway.of.sulfate.assimilation.and.cysteine.biosynthesis	mode_of_delivery	Vaginal	-0.00200489	0.00200489	0.000659108	230	213	0.00263068	0.0233004
PWY-5138..fatty.acid..beta..oxidation.IV..unsaturated..even.number.	probiotics_firstyr	probiotics_firstyr	-0.000963086	0.000963086	0.000317059	230	192	0.0026666	0.0234986
PWY-7204..pyridoxal.5..phosphate.salvage.II..plants.	probiotics_firstyr	probiotics_firstyr	-0.000981715	0.000981715	0.000323511	230	176	0.00269217	0.0236041
PWY-.1415..superpathway.of.heme.b.biosynthesis.from.uroporphyrinogen.III	mode_of_delivery	Vaginal	-0.00171489	0.00171489	0.000565905	230	206	0.00272847	0.0238022
GALACTARDEG.PWY-.D.galactarate.degradation.I	visit_age_mo	visit_age_mo	-0.000977023	0.000977023	0.000322945	230	221	0.00277218	0.0239428
GLUCARGALACTSUPER.PWY-.superpathway.of.D.glucarate.and.D.galactarate.degradation	visit_age_mo	visit_age_mo	-0.000977023	0.000977023	0.000322945	230	221	0.00277218	0.0239428
PWY-5675..nitrate.reduction.V..assimilatory.	visit_age_mo	visit_age_mo	-0.000987372	0.000987372	0.000328033	230	190	0.00291067	0.0248912
PWY-6.429..fatty.acid.biosynthesis.initiation..mitochondria.	visit_age_mo	visit_age_mo	0.000790396	0.000790396	0.000262549	230	229	0.00290606	0.0248912
METH.ACETATE.PWY-.methanogenesis.from.acetate	visit_age_mo	visit_age_mo	0.000815492	0.000815492	0.000271592	230	121	0.00297891	0.0253474	METH-ACETATE-PWY	Acetate
PWY-6588..pyruvate.fermentation.to.acetone	symptoms	AP	0.00139897	0.00139897	0.000466148	230	170	0.00299321	0.0253474
CALVIN.PWY-.Calvin.Benson.Bassham.cycle	mode_of_delivery	Vaginal	-0.00163124	0.00163124	0.000544577	230	228	0.00304746	0.0256815
PWY-2221..Entner.Doudoroff.pathway.III..semi.phosphorylative.	mode_of_delivery	Vaginal	-0.000337191	0.000337191	0.00011271	230	12	0.00308366	0.02579
PWY-5913..partial.TCA.cycle..obligate.autotrophs.	mode_of_delivery	Vaginal	-0.00216136	0.00216136	0.000722616	230	213	0.00309004	0.02579
PWY-I9..L.cysteine.biosynthesis.VI..from.L.methionine.	visit_age_mo	visit_age_mo	-0.00106708	0.00106708	0.000356955	230	229	0.00310576	0.0257971
PWY-7383..anaerobic.energy.metabolism..invertebrates..cytosol.	symptoms	AP	0.00213697	0.00213697	0.000715255	230	156	0.0031225	0.0258127
PWY-5345..superpathway.of.L.methionine.biosynthesis..by.sulfhydrylation.	mode_of_delivery	Vaginal	-0.00189056	0.00189056	0.000634141	230	212	0.00318608	0.0260973
PWY-7245..superpathway.of.NAD.NADP...NADH.NADPH.interconversion..yeast.	mode_of_delivery	Vaginal	-0.000651717	0.000651717	0.00021861	230	28	0.00318718	0.0260973
PWY-7723..bacterial.bioluminescence	mode_of_delivery	Vaginal	-0.000553987	0.000553987	0.000185921	230	41	0.00320203	0.0260973
GLUCARDEG.PWY-.D.glucarate.degradation.I	mode_of_delivery	Vaginal	-0.00171899	0.00171899	0.000579319	230	212	0.00332931	0.0270078
PWY-7805...aminomethyl.phosphonate.degradation	probiotics_firstyr	probiotics_firstyr	-0.000547881	0.000547881	0.000185131	230	56	0.00341176	0.0275479
CITRULBIO.PWY-.L.citrulline.biosynthesis	probiotics_firstyr	probiotics_firstyr	-0.00133808	0.00133808	0.000452925	230	219	0.00346674	0.0278623
MET.SAM.PWY-.superpathway.of.S.adenosyl.L.methionine.biosynthesis	mode_of_delivery	Vaginal	-0.0020786	0.0020786	0.000708467	230	213	0.0036933	0.0295464
PWY-841..superpathway.of.purine.nucleotides.de.novo.biosynthesis.I	visit_age_mo	visit_age_mo	0.000703377	0.000703377	0.00024026	230	228	0.00376713	0.0298618
PWY-.1241..ADP.L.glycero..beta..D.manno.heptose.biosynthesis	probiotics_firstyr	probiotics_firstyr	-0.000869448	0.000869448	0.000296927	230	219	0.00376019	0.0298618
CATECHOL.ORTHO.CLEAVAGE.PWY-.catechol.degradation.to..beta..ketoadipate	mode_of_delivery	Vaginal	-0.000748529	0.000748529	0.000255892	230	55	0.00379498	0.0299459
GLUCUROCAT.PWY-.superpathway.of..beta..D.glucuronosides.degradation	visit_age_mo	visit_age_mo	0.000711684	0.000711684	0.000243533	230	215	0.00382851	0.0300738
PPGPPMET.PWY-.ppGpp.metabolism	visit_age_mo	visit_age_mo	-0.000700931	0.000700931	0.000240084	230	174	0.00386195	0.0301998
PWY-6803..phosphatidylcholine.acyl.editing	mode_of_delivery	Vaginal	-0.00177022	0.00177022	0.000608304	230	212	0.00397593	0.0309517
ILEUSYN.PWY-.L.isoleucine.biosynthesis.I..from.threonine.	visit_age_mo	visit_age_mo	-0.000637773	0.000637773	0.000219736	230	230	0.00407059	0.0314069
PWY-7204..pyridoxal.5..phosphate.salvage.II..plants.	visit_age_mo	visit_age_mo	-0.000703981	0.000703981	0.000242471	230	176	0.00405928	0.0314069
ORNDEG.PWY-.superpathway.of.ornithine.degradation	mode_of_delivery	Vaginal	-0.00219434	0.00219434	0.000758068	230	198	0.00416938	0.0320059
P461.PWY-.hexitol.fermentation.to.lactate..formate..ethanol.and.acetate	visit_age_mo	visit_age_mo	-0.000941939	0.000941939	0.000325545	230	225	0.0041851	0.0320059	P461-PWY	SCFA
GLYOXYLATE.BYPASS..glyoxylate.cycle	mode_of_delivery	Vaginal	-0.00178343	0.00178343	0.000617174	230	208	0.00423354	0.0322343
PWY-7409..phospholipid.remodeling..phosphatidylethanolamine..yeast.	probiotics_firstyr	probiotics_firstyr	-0.000697112	0.000697112	0.000242009	230	126	0.00435386	0.0330056
PWY-6969..TCA.cycle.V..2.oxoglutarate.synthase.	mode_of_delivery	Vaginal	-0.00200605	0.00200605	0.000697826	230	196	0.00443168	0.0334496
HOMOSER.METSYN.PWY-.L.methionine.biosynthesis.I	mode_of_delivery	Vaginal	-0.00186277	0.00186277	0.000648909	230	213	0.00448734	0.0336715
P122.PWY-.heterolactic.fermentation	visit_age_mo	visit_age_mo	-0.000698325	0.000698325	0.000243343	230	172	0.00449987	0.0336715	P122-PWY	SCFA
PWY-7873..D.erythronate.degradation.II	probiotics_firstyr	probiotics_firstyr	-0.000430175	0.000430175	0.000150148	230	73	0.00456493	0.0338663
PWY-6.409..superpathway.of.purine.nucleotide.salvage	mode_of_delivery	Vaginal	-0.00178333	0.00178333	0.000622341	230	215	0.0045577	0.0338663
METSYN.PWY-.superpathway.of.L.homoserine.and.L.methionine.biosynthesis	mode_of_delivery	Vaginal	-0.00208013	0.00208013	0.000727186	230	213	0.00462766	0.0341856
PWY-7234..inosine.5..phosphate.biosynthesis.III	mode_of_delivery	Vaginal	-0.00170187	0.00170187	0.000596795	230	225	0.00475352	0.0349666
UNMAPPED	visit_age_mo	visit_age_mo	0.0158669	0.0158669	0.00557997	230	230	0.0048723	0.0355391
AEROBACTINSYN.PWY-.aerobactin.biosynthesis	probiotics_firstyr	probiotics_firstyr	-0.000581036	0.000581036	0.000204277	230	56	0.00486037	0.0355391
PWY-5913..partial.TCA.cycle..obligate.autotrophs.	probiotics_firstyr	probiotics_firstyr	-0.00127471	0.00127471	0.000448925	230	213	0.0049325	0.0357662
PWY-7807..glyphosate.degradation.III	probiotics_firstyr	probiotics_firstyr	-0.000595259	0.000595259	0.000209696	230	74	0.00494463	0.0357662
HEMESYN2.PWY-.heme.b.biosynthesis.II..oxygen.independent.	visit_age_mo	visit_age_mo	-0.000755494	0.000755494	0.000266586	230	224	0.00501549	0.0361281
PWY-5840..superpathway.of.menaquinol.7.biosynthesis	visit_age_mo	visit_age_mo	-0.000792666	0.000792666	0.000280181	230	202	0.00508927	0.0365081
PWY-6123..inosine.5..phosphate.biosynthesis.I	visit_age_mo	visit_age_mo	0.000594874	0.000594874	0.000210497	230	229	0.00513674	0.0366971
PWY-7340..9.cis..11.trans.octadecadienoyl.CoA.degradation..isomerase.dependent..yeast.	mode_of_delivery	Vaginal	-0.000870427	0.000870427	0.000308333	230	127	0.00518381	0.0368815
SO4ASSIM.PWY-.assimilatory.sulfate.reduction.I	mode_of_delivery	Vaginal	-0.00189472	0.00189472	0.000671909	230	213	0.00523257	0.0370765
PWY-6906..chitin.derivatives.degradation	mode_of_delivery	Vaginal	0.00182065	0.00182065	0.00064868	230	66	0.00544402	0.038418
PWY-.1533..methylphosphonate.degradation.I	probiotics_firstyr	probiotics_firstyr	-0.000477948	0.000477948	0.000170513	230	74	0.00550495	0.0386907
THREOCAT.PWY-.superpathway.of.L.threonine.metabolism	mode_of_delivery	Vaginal	-0.00123418	0.00123418	0.000440975	230	87	0.00557522	0.0390265
HEMESYN2.PWY-.heme.b.biosynthesis.II..oxygen.independent.	mode_of_delivery	Vaginal	-0.00160007	0.00160007	0.000572531	230	224	0.00564255	0.0393393
X1CMET2.PWY-.folate.transformations.III..E..coli.	visit_age_mo	visit_age_mo	0.000715274	0.000715274	0.000256423	230	226	0.0057327	0.0396493
PWY-7211..superpathway.of.pyrimidine.deoxyribonucleotides.de.novo.biosynthesis	mode_of_delivery	Vaginal	-0.00175554	0.00175554	0.000629116	230	178	0.00571467	0.0396493
PWY-6703..preQ0.biosynthesis	visit_age_mo	visit_age_mo	0.000779785	0.000779785	0.000279727	230	229	0.00576299	0.0397006
FOLSYN.PWY-.superpathway.of.tetrahydrofolate.biosynthesis.and.salvage	probiotics_firstyr	probiotics_firstyr	-0.000969477	0.000969477	0.000348605	230	202	0.00587819	0.0403341
PWY-6612..superpathway.of.tetrahydrofolate.biosynthesis	probiotics_firstyr	probiotics_firstyr	-0.000873303	0.000873303	0.000315381	230	202	0.0060911	0.0415213
PWY-7196..superpathway.of.pyrimidine.ribonucleosides.salvage	visit_age_mo	visit_age_mo	0.000422922	0.000422922	0.000152824	230	64	0.00612124	0.0415213
PWY-.1338..polymyxin.resistance	probiotics_firstyr	probiotics_firstyr	-0.000803637	0.000803637	0.000290406	230	177	0.00612296	0.0415213
HEME.BIOSYNTHESIS.II..heme.b.biosynthesis.I..aerobic.	visit_age_mo	visit_age_mo	-0.000710222	0.000710222	0.000257059	230	220	0.00620343	0.0417409
P122.PWY-.heterolactic.fermentation	mode_of_delivery	Vaginal	-0.00144434	0.00144434	0.000522614	230	172	0.00618875	0.0417409	P122-PWY	SCFA
DTDPRHAMSYN.PWY-.dTDP..beta..L.rhamnose.biosynthesis	probiotics_firstyr	probiotics_firstyr	0.00140243	0.00140243	0.000508079	230	229	0.00625171	0.0417422
POLYAMINSYN3.PWY-.superpathway.of.polyamine.biosynthesis.II	mode_of_delivery	Vaginal	-0.000682558	0.000682558	0.000247257	230	36	0.00624682	0.0417422
PWY-6807..xyloglucan.degradation.II..exoglucanase.	visit_age_mo	visit_age_mo	0.00051306	0.00051306	0.00018616	230	22	0.00633054	0.0421066
PWY-5154..L.arginine.biosynthesis.III..via.N.acetyl.L.citrulline.	mode_of_delivery	Vaginal	-0.00142367	0.00142367	0.000517879	230	229	0.00646226	0.0428187
PWY-5136..fatty.acid..beta..oxidation.II..plant.peroxisome.	mode_of_delivery	Vaginal	-0.0018815	0.0018815	0.000686041	230	225	0.00658709	0.0431517
PWY-6182..superpathway.of.salicylate.degradation	mode_of_delivery	Vaginal	-0.000680349	0.000680349	0.000247994	230	40	0.00657058	0.0431517
PWY-7165..L.ascorbate.biosynthesis.VIII..engineered.pathway.	visit_age_mo	visit_age_mo	-0.000398113	0.000398113	0.000145143	230	34	0.00658029	0.0431517
P105.PWY-.TCA.cycle.IV..2.oxoglutarate.decarboxylase.	mode_of_delivery	Vaginal	-0.00175368	0.00175368	0.00064033	230	174	0.00666204	0.0432516
PWY-5103..L.isoleucine.biosynthesis.III	visit_age_mo	visit_age_mo	-0.000627987	0.000627987	0.000229282	230	230	0.00665778	0.0432516
THRESYN.PWY-.superpathway.of.L.threonine.biosynthesis	visit_age_mo	visit_age_mo	-0.00057553	0.00057553	0.000210205	230	230	0.00667709	0.0432516
FASYN.ELONG.PWY-.fatty.acid.elongation....saturated	probiotics_firstyr	probiotics_firstyr	-0.000969726	0.000969726	0.000356279	230	226	0.00700064	0.045021
PWY-5417..catechol.degradation.III..ortho.cleavage.pathway.	mode_of_delivery	Vaginal	-0.000781166	0.000781166	0.000287142	230	54	0.00702805	0.045021
PWY-5431..aromatic.compounds.degradation.via..beta..ketoadipate	mode_of_delivery	Vaginal	-0.000781166	0.000781166	0.000287142	230	54	0.00702805	0.045021
PWY-5747..2.methylcitrate.cycle.II	visit_age_mo	visit_age_mo	-0.000458827	0.000458827	0.00016898	230	140	0.00713578	0.0455431
PWY-6562..norspermidine.biosynthesis	mode_of_delivery	Vaginal	-0.000618851	0.000618851	0.000228206	230	34	0.00720849	0.0458245
PWY-7883..anhydromuropeptides.recycling.II	mode_of_delivery	Vaginal	-0.00121722	0.00121722	0.000449047	230	189	0.00723267	0.0458245
PWY-5347..superpathway.of.L.methionine.biosynthesis..transsulfuration.	mode_of_delivery	Vaginal	-0.00198967	0.00198967	0.000736588	230	213	0.00743495	0.0469348
GLYCOLYSIS.E.D..superpathway.of.glycolysis.and.the.Entner.Doudoroff.pathway	probiotics_firstyr	probiotics_firstyr	-0.000943103	0.000943103	0.000350039	230	224	0.00758599	0.0472017
PWY-5189..tetrapyrrole.biosynthesis.II..from.glycine.	mode_of_delivery	Vaginal	-0.00162403	0.00162403	0.000602161	230	196	0.0075263	0.0472017
PWY-5345..superpathway.of.L.methionine.biosynthesis..by.sulfhydrylation.	visit_age_mo	visit_age_mo	-0.000795772	0.000795772	0.000295273	230	212	0.0075694	0.0472017
PWY-5862..superpathway.of.demethylmenaquinol.9.biosynthesis	visit_age_mo	visit_age_mo	-0.00075365	0.00075365	0.000279659	230	192	0.00757268	0.0472017
PWY-5920..superpathway.of.heme.b.biosynthesis.from.glycine	probiotics_firstyr	probiotics_firstyr	-0.000877368	0.000877368	0.000325828	230	185	0.00762024	0.0472455
PWY-5918..superpathway.of.heme.b.biosynthesis.from.glutamate	mode_of_delivery	Vaginal	-0.00161787	0.00161787	0.000601372	230	206	0.00767436	0.0474117
PRPP.PWY-.superpathway.of.histidine..purine..and.pyrimidine.biosynthesis	mode_of_delivery	Vaginal	-0.00168084	0.00168084	0.00062649	230	187	0.00783944	0.0482598
PWY-7664..oleate.biosynthesis.IV..anaerobic.	probiotics_firstyr	probiotics_firstyr	-0.000945259	0.000945259	0.000352514	230	226	0.00787292	0.0482946
CARNMET.PWY-.L.carnitine.degradation.I	probiotics_firstyr	probiotics_firstyr	-0.000515629	0.000515629	0.000192731	230	139	0.00801295	0.0486381
FAO.PWY-.fatty.acid..beta..oxidation.I..generic.	probiotics_firstyr	probiotics_firstyr	-0.00115766	0.00115766	0.000432454	230	198	0.00797664	0.0486381
PWY-7268..cytosolic.NADPH.production..yeast.	visit_age_mo	visit_age_mo	-0.000348068	0.000348068	0.000130091	230	29	0.00800858	0.0486381
PWY-5154..L.arginine.biosynthesis.III..via.N.acetyl.L.citrulline.	probiotics_firstyr	probiotics_firstyr	-0.00086013	0.00086013	0.000321733	230	229	0.00805826	0.0487426
PWY-6282..palmitoleate.biosynthesis.I..from..5Z..dodec.5.enoate.	probiotics_firstyr	probiotics_firstyr	-0.000950138	0.000950138	0.00035598	230	226	0.00816003	0.0490167
PWY-.461..L.lysine.degradation.I	probiotics_firstyr	probiotics_firstyr	-0.000620553	0.000620553	0.000232428	230	129	0.0081415	0.0490167
PWY-5971..palmitate.biosynthesis..type.II.fatty.acid.synthase.	probiotics_firstyr	probiotics_firstyr	-0.00145609	0.00145609	0.000546028	230	195	0.00821649	0.0491856
DARABCATK12.PWY-.D.arabinose.degradation.I	visit_age_mo	visit_age_mo	-0.000411106	0.000411106	0.000154283	230	141	0.00826579	0.0493107
GALACTITOLCAT.PWY-.galactitol.degradation	visit_age_mo	visit_age_mo	-0.000825476	0.000825476	0.000310098	230	182	0.00832869	0.0495158
PWY-6992..1.5.anhydrofructose.degradation	visit_age_mo	visit_age_mo	0.000557258	0.000557258	0.000210143	230	87	0.00857599	0.050812
PWY-6609..adenine.and.adenosine.salvage.III	visit_age_mo	visit_age_mo	0.000707129	0.000707129	0.000267247	230	229	0.00872049	0.0514924
PWY-5860..superpathway.of.demethylmenaquinol.6.biosynthesis.I	mode_of_delivery	Vaginal	-0.00166966	0.00166966	0.000633014	230	175	0.00893121	0.0525579
PWY-1042..glycolysis.IV	visit_age_mo	visit_age_mo	0.000639725	0.000639725	0.000242978	230	229	0.009054	0.0527567
PWY-5189..tetrapyrrole.biosynthesis.II..from.glycine.	probiotics_firstyr	probiotics_firstyr	-0.000984899	0.000984899	0.000374093	230	196	0.00905616	0.0527567
PWY-.862...5Z..dodecenoate.biosynthesis.I	probiotics_firstyr	probiotics_firstyr	-0.000903222	0.000903222	0.000343023	230	227	0.00904692	0.0527567
COLANSYN.PWY-.colanic.acid.building.blocks.biosynthesis	probiotics_firstyr	probiotics_firstyr	-0.000901667	0.000901667	0.000342735	230	220	0.00910725	0.0528769
PWY-6519..8.amino.7.oxononanoate.biosynthesis.I	probiotics_firstyr	probiotics_firstyr	-0.000964338	0.000964338	0.000366965	230	224	0.00918346	0.0531416
PWY-.42..2.methylcitrate.cycle.I	visit_age_mo	visit_age_mo	-0.000587706	0.000587706	0.000223744	230	161	0.0092145	0.0531441
DENOVOPURINE2.PWY-.superpathway.of.purine.nucleotides.de.novo.biosynthesis.II	mode_of_delivery	Vaginal	-0.00160331	0.00160331	0.000611194	230	191	0.00930519	0.0532997
PRPP.PWY-.superpathway.of.histidine..purine..and.pyrimidine.biosynthesis	probiotics_firstyr	probiotics_firstyr	-0.00102029	0.00102029	0.000389207	230	187	0.00935302	0.0532997
PWY-6284..superpathway.of.unsaturated.fatty.acids.biosynthesis..E..coli.	probiotics_firstyr	probiotics_firstyr	-0.00108123	0.00108123	0.000412425	230	183	0.00934796	0.0532997
PWY-6588..pyruvate.fermentation.to.acetone	probiotics_firstyr	probiotics_firstyr	-0.000611097	0.000611097	0.000233152	230	170	0.00936429	0.0532997
PWY-6961..L.ascorbate.degradation.II..bacterial..aerobic.	probiotics_firstyr	probiotics_firstyr	-0.00103933	0.00103933	0.000397022	230	196	0.00945044	0.0536142
PWY-6519..8.amino.7.oxononanoate.biosynthesis.I	visit_age_mo	visit_age_mo	-0.000719034	0.000719034	0.000275041	230	224	0.00954537	0.0538167
RUMP.PWY-.formaldehyde.oxidation.I	visit_age_mo	visit_age_mo	0.000464484	0.000464484	0.000177678	230	115	0.00954812	0.0538167
PWY-6285..superpathway.of.fatty.acids.biosynthesis..E..coli.	probiotics_firstyr	probiotics_firstyr	-0.00125668	0.00125668	0.000483154	230	176	0.00991186	0.0556861
HEME.BIOSYNTHESIS.II.1..heme.b.biosynthesis.V..aerobic.	mode_of_delivery	Vaginal	-0.00153895	0.00153895	0.00059265	230	213	0.0100319	0.05603
HEXITOLDEGSUPER.PWY-.superpathway.of.hexitol.degradation..bacteria.	symptoms	AP	0.00242623	0.00242623	0.000934415	230	179	0.0100376	0.05603
PWY-5659..GDP.mannose.biosynthesis	probiotics_firstyr	probiotics_firstyr	-0.000824472	0.000824472	0.000318545	230	228	0.0102749	0.0571704
PWY-7039..phosphatidate.metabolism..as.a.signaling.molecule	mode_of_delivery	Vaginal	-0.00057153	0.00057153	0.000221202	230	35	0.010406	0.0577152
GALACTARDEG.PWY-.D.galactarate.degradation.I	mode_of_delivery	Vaginal	-0.00178494	0.00178494	0.000693571	230	221	0.0107082	0.0584573
GLUCARGALACTSUPER.PWY-.superpathway.of.D.glucarate.and.D.galactarate.degradation	mode_of_delivery	Vaginal	-0.00178494	0.00178494	0.000693571	230	221	0.0107082	0.0584573
P4.PWY-.superpathway.of.L.lysine..L.threonine.and.L.methionine.biosynthesis.I	probiotics_firstyr	probiotics_firstyr	-0.00111517	0.00111517	0.000433304	230	208	0.0107057	0.0584573
PWY-7185..UTP.and.CTP.dephosphorylation.I	probiotics_firstyr	probiotics_firstyr	0.00170648	0.00170648	0.000662793	230	154	0.0106743	0.0584573
PWY-.1586..peptidoglycan.maturation..meso.diaminopimelate.containing.	probiotics_firstyr	probiotics_firstyr	-0.00118002	0.00118002	0.000458332	230	229	0.0106768	0.0584573
PWY-7340..9.cis..11.trans.octadecadienoyl.CoA.degradation..isomerase.dependent..yeast.	probiotics_firstyr	probiotics_firstyr	-0.000492484	0.000492484	0.000191552	230	127	0.0107845	0.0586896
METHGLYUT.PWY-.superpathway.of.methylglyoxal.degradation	probiotics_firstyr	probiotics_firstyr	-0.000612941	0.000612941	0.000238728	230	183	0.0108904	0.0590805
PWY-.781..aspartate.superpathway	probiotics_firstyr	probiotics_firstyr	-0.0010853	0.0010853	0.000423977	230	207	0.0111285	0.0601841
PWY-7688..dTDP..alpha..D.ravidosamine.and.dTDP.4.acetyl..alpha..D.ravidosamine.biosynthesis	visit_age_mo	visit_age_mo	0.000370979	0.000370979	0.000145004	230	29	0.0111717	0.0602299
HEME.BIOSYNTHESIS.II..heme.b.biosynthesis.I..aerobic.	mode_of_delivery	Vaginal	-0.00141043	0.00141043	0.000552071	230	220	0.0112853	0.0604909
PWY-5971..palmitate.biosynthesis..type.II.fatty.acid.synthase.	symptoms	AP	0.00278889	0.00278889	0.00109169	230	195	0.0112898	0.0604909
PWY-5677..succinate.fermentation.to.butanoate	symptoms	AP	0.000778575	0.000778575	0.000305214	230	81	0.011408	0.0609362	PWY-5677	SCFA
GALACTITOLCAT.PWY-.galactitol.degradation	symptoms	AP	0.00210758	0.00210758	0.000827205	230	182	0.0115061	0.0612718
DARABCATK12.PWY-.D.arabinose.degradation.I	probiotics_firstyr	probiotics_firstyr	-0.000524066	0.000524066	0.000205849	230	141	0.0115689	0.0613635
PWY-5981..CDP.diacylglycerol.biosynthesis.III	visit_age_mo	visit_age_mo	-0.000604094	0.000604094	0.000237374	230	206	0.0116005	0.0613635
PWY-7245..superpathway.of.NAD.NADP...NADH.NADPH.interconversion..yeast.	visit_age_mo	visit_age_mo	-0.000258957	0.000258957	0.000101791	230	28	0.0116294	0.0613635
PWY-6549..L.glutamine.biosynthesis.III	mode_of_delivery	Vaginal	-0.00122517	0.00122517	0.000483682	230	167	0.0119897	0.0630732
PWY-7783..plasmalogen.degradation	mode_of_delivery	Vaginal	-0.000251325	0.000251325	9.93542e-05	230	15	0.0121043	0.0634833
KETOGLUCONMET.PWY-.ketogluconate.metabolism	visit_age_mo	visit_age_mo	-0.000773995	0.000773995	0.000306359	230	194	0.0122103	0.063655
PWY-5028..L.histidine.degradation.II	mode_of_delivery	Vaginal	-0.000872695	0.000872695	0.000345416	230	84	0.012208	0.063655
PWY-4984..urea.cycle	visit_age_mo	visit_age_mo	0.000942781	0.000942781	0.000373883	230	179	0.0123748	0.0643196
PWY-5838..superpathway.of.menaquinol.8.biosynthesis.I	probiotics_firstyr	probiotics_firstyr	-0.000983866	0.000983866	0.000390449	230	203	0.012435	0.0644395
PWY-6284..superpathway.of.unsaturated.fatty.acids.biosynthesis..E..coli.	visit_age_mo	visit_age_mo	-0.000778525	0.000778525	0.000309113	230	183	0.0124782	0.0644706
PWY-5415..catechol.degradation.I..meta.cleavage.pathway.	visit_age_mo	visit_age_mo	-0.000141792	0.000141792	5.63797e-05	230	33	0.0126038	0.0649264
PWY-6527..stachyose.degradation	mode_of_delivery	Vaginal	-0.00158116	0.00158116	0.000629644	230	230	0.0127347	0.0652135
PWY-.1586..peptidoglycan.maturation..meso.diaminopimelate.containing.	mode_of_delivery	Vaginal	-0.00185281	0.00185281	0.000737758	230	229	0.0127273	0.0652135
PWY-5845..superpathway.of.menaquinol.9.biosynthesis	visit_age_mo	visit_age_mo	-0.000747606	0.000747606	0.000298196	230	192	0.0128793	0.0657603
PWY-5121..superpathway.of.geranylgeranyl.diphosphate.biosynthesis.II..via.MEP.	visit_age_mo	visit_age_mo	0.000739048	0.000739048	0.000295092	230	219	0.0129728	0.06585
PWY-6.391..fatty.acid..beta..oxidation.VI..mammalian.peroxisome.	symptoms	AP	0.00133622	0.00133622	0.000533485	230	149	0.0129643	0.06585
PWY-5972..stearate.biosynthesis.I..animals.	mode_of_delivery	Vaginal	-0.000660074	0.000660074	0.000263719	230	122	0.0130271	0.0659333
GLYCOL.GLYOXDEG.PWY-.superpathway.of.glycol.metabolism.and.degradation	visit_age_mo	visit_age_mo	-0.000401109	0.000401109	0.000160609	230	137	0.0132259	0.0667449
PWY-5850..superpathway.of.menaquinol.6.biosynthesis	probiotics_firstyr	probiotics_firstyr	-0.00105217	0.00105217	0.000421766	230	175	0.0133264	0.0668629
PWY-5896..superpathway.of.menaquinol.10.biosynthesis	probiotics_firstyr	probiotics_firstyr	-0.00105217	0.00105217	0.000421766	230	175	0.0133264	0.0668629
PWY-7242..D.fructuronate.degradation	mode_of_delivery	Vaginal	-0.00122168	0.00122168	0.000490006	230	222	0.0133803	0.0669399
GLUCOSE1PMETAB.PWY-.glucose.and.glucose.1.phosphate.degradation	visit_age_mo	visit_age_mo	-0.001072	0.001072	0.000430769	230	212	0.0135506	0.0675972
PWY-5367..petroselinate.biosynthesis	visit_age_mo	visit_age_mo	-0.000516293	0.000516293	0.000207658	230	183	0.0136362	0.0678292
GLUCARDEG.PWY-.D.glucarate.degradation.I	probiotics_firstyr	probiotics_firstyr	-0.000894299	0.000894299	0.000359902	230	212	0.0136896	0.0679006
PWY-5656..mannosylglycerate.biosynthesis.I	probiotics_firstyr	probiotics_firstyr	-0.000847895	0.000847895	0.000341889	230	163	0.0138706	0.068407
PWY-.41..allantoin.degradation.IV..anaerobic.	mode_of_delivery	Vaginal	-0.000654232	0.000654232	0.000263782	230	97	0.0138642	0.068407
PWY-5747..2.methylcitrate.cycle.II	mode_of_delivery	Vaginal	-0.000897166	0.000897166	0.000362908	230	140	0.0141711	0.0696915
PWY-5189..tetrapyrrole.biosynthesis.II..from.glycine.	visit_age_mo	visit_age_mo	-0.000691989	0.000691989	0.000280383	230	196	0.0143318	0.0699149
PWY-5941..glycogen.degradation.II	visit_age_mo	visit_age_mo	-0.00084761	0.00084761	0.000343458	230	230	0.0143374	0.0699149
PWY-6285..superpathway.of.fatty.acids.biosynthesis..E..coli.	visit_age_mo	visit_age_mo	-0.000894046	0.000894046	0.000362124	230	176	0.0142976	0.0699149
PWY-.781..aspartate.superpathway	mode_of_delivery	Vaginal	-0.00168245	0.00168245	0.000682458	230	207	0.0144389	0.0702125
POLYISOPRENSYN.PWY-.polyisoprenoid.biosynthesis..E..coli.	probiotics_firstyr	probiotics_firstyr	-0.000812084	0.000812084	0.000329569	230	224	0.0144858	0.0702439
PWY-5723..Rubisco.shunt	probiotics_firstyr	probiotics_firstyr	-0.00119163	0.00119163	0.000484455	230	207	0.0146579	0.0708088
PWY-6305..superpathway.of.putrescine.biosynthesis	probiotics_firstyr	probiotics_firstyr	-0.000935775	0.000935775	0.000380539	230	222	0.0146839	0.0708088
P4.PWY-.superpathway.of.L.lysine..L.threonine.and.L.methionine.biosynthesis.I	mode_of_delivery	Vaginal	-0.0017133	0.0017133	0.000697471	230	208	0.0147887	0.0711169
GLYCOL.GLYOXDEG.PWY-.superpathway.of.glycol.metabolism.and.degradation	probiotics_firstyr	probiotics_firstyr	-0.000525948	0.000525948	0.000214288	230	137	0.0148712	0.0713161
PWY-7229..superpathway.of.adenosine.nucleotides.de.novo.biosynthesis.I	visit_age_mo	visit_age_mo	0.000657584	0.000657584	0.000268112	230	229	0.0149417	0.0714569
PWY-5415..catechol.degradation.I..meta.cleavage.pathway.	mode_of_delivery	Vaginal	-0.00029608	0.00029608	0.000121083	230	33	0.0152431	0.0726981
TCA..TCA.cycle.I..prokaryotic.	probiotics_firstyr	probiotics_firstyr	-0.00110908	0.00110908	0.000454154	230	184	0.0153744	0.073123
PWY-5972..stearate.biosynthesis.I..animals.	symptoms	AP	0.000799457	0.000799457	0.000327562	230	122	0.0154346	0.0732088
PWY-5860..superpathway.of.demethylmenaquinol.6.biosynthesis.I	probiotics_firstyr	probiotics_firstyr	-0.000956806	0.000956806	0.00039326	230	175	0.0157544	0.0745062
PWY-6922..L.N.delta..acetylornithine.biosynthesis	mode_of_delivery	Vaginal	-0.000667484	0.000667484	0.00027445	230	86	0.0157939	0.0745062
FUC.RHAMCAT.PWY-.superpathway.of.fucose.and.rhamnose.degradation	probiotics_firstyr	probiotics_firstyr	-0.000856731	0.000856731	0.000352492	230	213	0.0158612	0.0745256
KDO.NAGLIPASYN.PWY-.superpathway.of..Kdo.2.lipid.A.biosynthesis	probiotics_firstyr	probiotics_firstyr	-0.000607221	0.000607221	0.000249889	230	142	0.0158839	0.0745256
PWY-5367..petroselinate.biosynthesis	mode_of_delivery	Vaginal	-0.00108187	0.00108187	0.000445974	230	183	0.0160604	0.0751505
PWY-5850..superpathway.of.menaquinol.6.biosynthesis	mode_of_delivery	Vaginal	-0.00163766	0.00163766	0.000678898	230	175	0.016657	0.0774256
PWY-5896..superpathway.of.menaquinol.10.biosynthesis	mode_of_delivery	Vaginal	-0.00163766	0.00163766	0.000678898	230	175	0.016657	0.0774256
PWY-7384..anaerobic.energy.metabolism..invertebrates..mitochondrial.	mode_of_delivery	Vaginal	-0.000412884	0.000412884	0.0001712	230	31	0.0166804	0.0774256	PWY-7384	SCFA
PWY-6969..TCA.cycle.V..2.oxoglutarate.synthase.	visit_age_mo	visit_age_mo	-0.000783267	0.000783267	0.000324926	230	196	0.0167298	0.0774476
PWY-6.409..superpathway.of.purine.nucleotide.salvage	visit_age_mo	visit_age_mo	-0.000697937	0.000697937	0.000289779	230	215	0.016823	0.077672
PWY-6318..L.phenylalanine.degradation.IV..mammalian..via.side.chain.	probiotics_firstyr	probiotics_firstyr	-0.000328198	0.000328198	0.000136527	230	69	0.0170308	0.078423
PENTOSE.P.PWY-.pentose.phosphate.pathway	mode_of_delivery	Vaginal	-0.00117802	0.00117802	0.000491152	230	229	0.0172793	0.0788294
PWY-5695..inosine.5..phosphate.degradation	visit_age_mo	visit_age_mo	0.000581563	0.000581563	0.000242578	230	229	0.0173277	0.0788294
PWY-6284..superpathway.of.unsaturated.fatty.acids.biosynthesis..E..coli.	mode_of_delivery	Vaginal	-0.00159362	0.00159362	0.000663863	230	183	0.0171854	0.0788294
PWY-7013...S..propane.1.2.diol.degradation	visit_age_mo	visit_age_mo	-0.000875693	0.000875693	0.000365325	230	184	0.0173461	0.0788294	PWY-7013	SCFA
PYRIDNUCSYN.PWY-.NAD.de.novo.biosynthesis.I..from.aspartate.	mode_of_delivery	Vaginal	0.00115952	0.00115952	0.000483212	230	230	0.0172269	0.0788294
P461.PWY-.hexitol.fermentation.to.lactate..formate..ethanol.and.acetate	mode_of_delivery	Vaginal	-0.00167347	0.00167347	0.000699154	230	225	0.0175063	0.0793496	P461-PWY	SCFA
UNINTEGRATED	visit_age_mo	visit_age_mo	-0.0112852	0.0112852	0.00472114	230	230	0.0176561	0.0798201
PWY-5972..stearate.biosynthesis.I..animals.	probiotics_firstyr	probiotics_firstyr	-0.000390749	0.000390749	0.000163835	230	122	0.0179082	0.0805403
TCA.GLYOX.BYPASS..superpathway.of.glyoxylate.bypass.and.TCA	probiotics_firstyr	probiotics_firstyr	-0.00107531	0.00107531	0.000450776	230	180	0.0178868	0.0805403
GALACTARDEG.PWY-.D.galactarate.degradation.I	probiotics_firstyr	probiotics_firstyr	-0.00102375	0.00102375	0.000430881	230	221	0.0183427	0.0818117
GLUCARGALACTSUPER.PWY-.superpathway.of.D.glucarate.and.D.galactarate.degradation	probiotics_firstyr	probiotics_firstyr	-0.00102375	0.00102375	0.000430881	230	221	0.0183427	0.0818117
PWY-5861..superpathway.of.demethylmenaquinol.8.biosynthesis.I	probiotics_firstyr	probiotics_firstyr	-0.000883955	0.000883955	0.000371973	230	203	0.0183209	0.0818117
PWY-.1241..ADP.L.glycero..beta..D.manno.heptose.biosynthesis	mode_of_delivery	Vaginal	-0.00113522	0.00113522	0.000477951	230	219	0.0183794	0.0818117
PWY-7663..gondoate.biosynthesis..anaerobic.	probiotics_firstyr	probiotics_firstyr	-0.0007654	0.0007654	0.000322797	230	229	0.0185763	0.082477
DENOVOPURINE2.PWY-.superpathway.of.purine.nucleotides.de.novo.biosynthesis.II	probiotics_firstyr	probiotics_firstyr	-0.000899179	0.000899179	0.000379705	230	191	0.0187264	0.0829313
BIOTIN.BIOSYNTHESIS.PWY-.biotin.biosynthesis.I	probiotics_firstyr	probiotics_firstyr	-0.00083769	0.00083769	0.000354285	230	224	0.0189071	0.0835185
FUCCAT.PWY-.fucose.degradation	mode_of_delivery	Vaginal	-0.00133202	0.00133202	0.000563673	230	219	0.0189744	0.0836029
PWY-5130..2.oxobutanoate.degradation.I	visit_age_mo	visit_age_mo	0.000469998	0.000469998	0.000199214	230	191	0.0191672	0.0842386
PWY-.1477..ethanolamine.utilization	probiotics_firstyr	probiotics_firstyr	-0.00128766	0.00128766	0.000546782	230	228	0.019384	0.0849761
GOLPDLCAT.PWY-.superpathway.of.glycerol.degradation.to.1.3.propanediol	mode_of_delivery	Vaginal	-0.001114	0.001114	0.000473669	230	197	0.0195437	0.0850321
PWY-7184..pyrimidine.deoxyribonucleotides.de.novo.biosynthesis.I	visit_age_mo	visit_age_mo	-0.000708471	0.000708471	0.000300996	230	208	0.0194465	0.0850321
PWY-7761..NAD.salvage.pathway.II..PNC.IV.cycle.	mode_of_delivery	Vaginal	-0.00111725	0.00111725	0.000474962	230	225	0.0195204	0.0850321
COBALSYN.PWY-.superpathway.of.adenosylcobalamin.salvage.from.cobinamide.I	visit_age_mo	visit_age_mo	0.000648072	0.000648072	0.000275977	230	222	0.0197271	0.0856158
NAD.BIOSYNTHESIS.II..NAD.salvage.pathway.III..to.nicotinamide.riboside.	probiotics_firstyr	probiotics_firstyr	-0.000540217	0.000540217	0.000230253	230	193	0.0198354	0.0858709
PWY-6.391..fatty.acid..beta..oxidation.VI..mammalian.peroxisome.	visit_age_mo	visit_age_mo	0.000467719	0.000467719	0.00019999	230	149	0.0202272	0.0873492
P164.PWY-.purine.nucleobases.degradation.I..anaerobic.	visit_age_mo	visit_age_mo	0.000638855	0.000638855	0.00027437	230	143	0.0207758	0.089449
PWY-561..superpathway.of.glyoxylate.cycle.and.fatty.acid.degradation	probiotics_firstyr	probiotics_firstyr	-0.00102076	0.00102076	0.000438527	230	183	0.0208165	0.089449
PWY-7323..superpathway.of.GDP.mannose.derived.O.antigen.building.blocks.biosynthesis	probiotics_firstyr	probiotics_firstyr	-0.000847145	0.000847145	0.00036437	230	208	0.0209649	0.0898645
P42.PWY-.incomplete.reductive.TCA.cycle	mode_of_delivery	Vaginal	-0.00106395	0.00106395	0.000457996	230	191	0.0210688	0.0900871
PWY-6.399..gluconeogenesis.III	visit_age_mo	visit_age_mo	0.00062508	0.00062508	0.000269218	230	153	0.0211361	0.0901529
GLYOXYLATE.BYPASS..glyoxylate.cycle	probiotics_firstyr	probiotics_firstyr	-0.000885636	0.000885636	0.000383419	230	208	0.0218035	0.0927718
PWY-5180..toluene.degradation.I..aerobic...via.o.cresol.	mode_of_delivery	Vaginal	-0.000813485	0.000813485	0.000353096	230	29	0.0221428	0.0934688
PWY-6147..6.hydroxymethyl.dihydropterin.diphosphate.biosynthesis.I	mode_of_delivery	Vaginal	0.00153217	0.00153217	0.000665244	230	229	0.0221827	0.0934688
PWY-7208..superpathway.of.pyrimidine.nucleobases.salvage	visit_age_mo	visit_age_mo	0.000528947	0.000528947	0.00022953	230	229	0.0221078	0.0934688
PWY-8004..Entner.Doudoroff.pathway.I	mode_of_delivery	Vaginal	-0.00121201	0.00121201	0.000526233	230	227	0.0221822	0.0934688
POLYAMSYN.PWY-.superpathway.of.polyamine.biosynthesis.I	probiotics_firstyr	probiotics_firstyr	-0.000872342	0.000872342	0.00037985	230	214	0.0225648	0.0943915
PWY-6305..superpathway.of.putrescine.biosynthesis	visit_age_mo	visit_age_mo	-0.000655431	0.000655431	0.000285214	230	222	0.0224783	0.0943915
PWY-.1479..tRNA.processing	probiotics_firstyr	probiotics_firstyr	-0.000926072	0.000926072	0.00040324	230	213	0.0225629	0.0943915
PWY-6305..superpathway.of.putrescine.biosynthesis	mode_of_delivery	Vaginal	-0.00140542	0.00140542	0.000612537	230	222	0.0226886	0.0946813
PWY-7340..9.cis..11.trans.octadecadienoyl.CoA.degradation..isomerase.dependent..yeast.	symptoms	AP	0.000878306	0.000878306	0.000382976	230	127	0.0227499	0.0947095
REDCITCYC..TCA.cycle.VI..Helicobacter.	visit_age_mo	visit_age_mo	-0.000463687	0.000463687	0.000202749	230	123	0.0231254	0.0960425
PWY-6285..superpathway.of.fatty.acids.biosynthesis..E..coli.	mode_of_delivery	Vaginal	-0.00177744	0.00177744	0.000777712	230	176	0.0232165	0.0961445
UBISYN.PWY-.superpathway.of.ubiquinol.8.biosynthesis..early.decarboxylation.	visit_age_mo	visit_age_mo	-0.000342688	0.000342688	0.00014999	230	75	0.0232608	0.0961445
PWY-7858...5Z..dodecenoate.biosynthesis.II	probiotics_firstyr	probiotics_firstyr	-0.000807298	0.000807298	0.000353704	230	195	0.0233995	0.0964881
GALACT.GLUCUROCAT.PWY-.superpathway.of.hexuronide.and.hexuronate.degradation	visit_age_mo	visit_age_mo	0.000540641	0.000540641	0.000237255	230	188	0.0236212	0.0971716
ARG.POLYAMINE.SYN..superpathway.of.arginine.and.polyamine.biosynthesis	probiotics_firstyr	probiotics_firstyr	-0.00093062	0.00093062	0.000409054	230	214	0.0238446	0.0978588
PWY-6901..superpathway.of.glucose.and.xylose.degradation	probiotics_firstyr	probiotics_firstyr	-0.000620625	0.000620625	0.000272967	230	228	0.0239316	0.0979843
PWY-6708..ubiquinol.8.biosynthesis..early.decarboxylation.	visit_age_mo	visit_age_mo	-0.000327112	0.000327112	0.00014401	230	75	0.0240655	0.0983006
PWY-8173..anteiso.branched.chain.fatty.acid.biosynthesis	probiotics_firstyr	probiotics_firstyr	-0.000235549	0.000235549	0.00010394	230	14	0.0243903	0.0989288
PWY-8174..odd.iso.branched.chain.fatty.acid.biosynthesis	probiotics_firstyr	probiotics_firstyr	-0.000235549	0.000235549	0.00010394	230	14	0.0243903	0.0989288
PWY-8175..even.iso.branched.chain.fatty.acid.biosynthesis	probiotics_firstyr	probiotics_firstyr	-0.000235549	0.000235549	0.00010394	230	14	0.0243903	0.0989288
METSYN.PWY-.superpathway.of.L.homoserine.and.L.methionine.biosynthesis	probiotics_firstyr	probiotics_firstyr	-0.00102247	0.00102247	0.000451764	230	213	0.0245727	0.0992035
PWY-5136..fatty.acid..beta..oxidation.II..plant.peroxisome.	probiotics_firstyr	probiotics_firstyr	-0.000964228	0.000964228	0.000426203	230	225	0.0246294	0.0992035
PWY-5918..superpathway.of.heme.b.biosynthesis.from.glutamate	probiotics_firstyr	probiotics_firstyr	-0.000845445	0.000845445	0.000373603	230	206	0.0245928	0.0992035
PWY-7385..1.3.propanediol.biosynthesis..engineered.	mode_of_delivery	Vaginal	-0.00120401	0.00120401	0.000533146	230	149	0.0248847	0.0999995
PWY-7409..phospholipid.remodeling..phosphatidylethanolamine..yeast.	visit_age_mo	visit_age_mo	-0.000409334	0.000409334	0.000181386	230	126	0.0249872	0.10018
PWY-7242..D.fructuronate.degradation	visit_age_mo	visit_age_mo	0.000513235	0.000513235	0.00022816	230	222	0.0254517	0.101807
PWY-6703..preQ0.biosynthesis	mode_of_delivery	Vaginal	0.00134927	0.00134927	0.000600754	230	229	0.025678	0.102241
PWY-7807..glyphosate.degradation.III	mode_of_delivery	Vaginal	-0.000758144	0.000758144	0.000337539	230	74	0.0256696	0.102241
AEROBACTINSYN.PWY-.aerobactin.biosynthesis	symptoms	AP	0.000914208	0.000914208	0.000408418	230	56	0.0261732	0.102798
PWY-5100..pyruvate.fermentation.to.acetate.and.lactate.II	visit_age_mo	visit_age_mo	-0.000776243	0.000776243	0.000346546	230	230	0.0260721	0.102798	PWY-5100	SCFA
PWY-6435..4.hydroxybenzoate.biosynthesis.III..plants.	probiotics_firstyr	probiotics_firstyr	-0.000403438	0.000403438	0.000179919	230	56	0.0259151	0.102798
PWY-6608..guanosine.nucleotides.degradation.III	mode_of_delivery	Vaginal	-0.0016791	0.0016791	0.000749326	230	227	0.0260145	0.102798
PWY-.42..2.methylcitrate.cycle.I	mode_of_delivery	Vaginal	-0.00107599	0.00107599	0.000480522	230	161	0.0261211	0.102798
PWY-.42..2.methylcitrate.cycle.I	probiotics_firstyr	probiotics_firstyr	-0.00066893	0.00066893	0.000298525	230	161	0.0260166	0.102798
PWY-1861..formaldehyde.assimilation.II..assimilatory.RuMP.Cycle.	probiotics_firstyr	probiotics_firstyr	-0.000999687	0.000999687	0.000447013	230	189	0.0263087	0.103097
PWY-5347..superpathway.of.L.methionine.biosynthesis..transsulfuration.	probiotics_firstyr	probiotics_firstyr	-0.00102131	0.00102131	0.000457605	230	213	0.0266104	0.103873
PWY-6902..chitin.degradation.II..Vibrio.	visit_age_mo	visit_age_mo	-0.000849338	0.000849338	0.000380593	230	219	0.0266265	0.103873
COA.PWY-.coenzyme.A.biosynthesis.I..prokaryotic.	visit_age_mo	visit_age_mo	0.000492987	0.000492987	0.000221496	230	230	0.0270255	0.105193
PWY-6531..mannitol.cycle	visit_age_mo	visit_age_mo	-0.00060174	0.00060174	0.000270649	230	207	0.0271881	0.10559
PWY-5845..superpathway.of.menaquinol.9.biosynthesis	probiotics_firstyr	probiotics_firstyr	-0.000881711	0.000881711	0.00039786	230	192	0.0276836	0.107274
PWY-7383..anaerobic.energy.metabolism..invertebrates..cytosol.	visit_age_mo	visit_age_mo	0.000593606	0.000593606	0.000268131	230	156	0.0278418	0.107647
HSERMETANA.PWY-.L.methionine.biosynthesis.III	visit_age_mo	visit_age_mo	0.000636075	0.000636075	0.000287728	230	228	0.028065	0.108268
PWY-5989..stearate.biosynthesis.II..bacteria.and.plants.	probiotics_firstyr	probiotics_firstyr	-0.000809856	0.000809856	0.0003665	230	225	0.0281336	0.108292
PWY-.1533..methylphosphonate.degradation.I	mode_of_delivery	Vaginal	-0.000606217	0.000606217	0.000274468	230	74	0.0282047	0.108326
PWY-6126..superpathway.of.adenosine.nucleotides.de.novo.biosynthesis.II	visit_age_mo	visit_age_mo	0.000617292	0.000617292	0.000279808	230	229	0.0283868	0.108785
PWY-7389..superpathway.of.anaerobic.energy.metabolism..invertebrates.	mode_of_delivery	Vaginal	-0.000329094	0.000329094	0.000149299	230	21	0.0285188	0.10905	PWY-7389	Succite
HOMOSER.METSYN.PWY-.L.methionine.biosynthesis.I	probiotics_firstyr	probiotics_firstyr	-0.000888051	0.000888051	0.000403135	230	213	0.0286191	0.109193
KETOGLUCONMET.PWY-.ketogluconate.metabolism	probiotics_firstyr	probiotics_firstyr	-0.000899891	0.000899891	0.000408751	230	194	0.0287121	0.109307
MET.SAM.PWY-.superpathway.of.S.adenosyl.L.methionine.biosynthesis	probiotics_firstyr	probiotics_firstyr	-0.000968555	0.000968555	0.000440135	230	213	0.0287823	0.109334
PWY-7873..D.erythronate.degradation.II	mode_of_delivery	Vaginal	-0.000531643	0.000531643	0.000241687	230	73	0.028845	0.109334
ARGSYNBSUB.PWY-.L.arginine.biosynthesis.II..acetyl.cycle.	mode_of_delivery	Vaginal	-0.00140946	0.00140946	0.00064143	230	230	0.0290138	0.109734
PWY-7118..chitin.deacetylation	probiotics_firstyr	probiotics_firstyr	-0.000846754	0.000846754	0.000387106	230	203	0.0297438	0.11225
PWY-5747..2.methylcitrate.cycle.II	probiotics_firstyr	probiotics_firstyr	-0.000491238	0.000491238	0.000225456	230	140	0.0303805	0.114405
PWY-5367..petroselinate.biosynthesis	probiotics_firstyr	probiotics_firstyr	-0.000602543	0.000602543	0.000277062	230	183	0.0306906	0.115322
PWY-7316..dTDP.N.acetylviosamine.biosynthesis	probiotics_firstyr	probiotics_firstyr	0.000803139	0.000803139	0.000370054	230	48	0.031029	0.116342
PWY-.1261..anhydromuropeptides.recycling.I	visit_age_mo	visit_age_mo	-0.000583032	0.000583032	0.000269231	230	223	0.0313977	0.117471
GLUCONEO.PWY-.gluconeogenesis.I	mode_of_delivery	Vaginal	-0.000960959	0.000960959	0.000444194	230	229	0.0315658	0.117615
P562.PWY-.myo.inositol.degradation.I	probiotics_firstyr	probiotics_firstyr	0.000473769	0.000473769	0.000219003	230	96	0.0315719	0.117615
PWY-5692..allantoin.degradation.to.glyoxylate.II	mode_of_delivery	Vaginal	-0.00038281	0.00038281	0.000177369	230	49	0.0319658	0.118321
PWY-7392..taxadiene.biosynthesis..engineered.	mode_of_delivery	Vaginal	0.00150348	0.00150348	0.000696388	230	190	0.0319105	0.118321
URDEGR.PWY-.superpathway.of.allantoin.degradation.in.plants	mode_of_delivery	Vaginal	-0.00038281	0.00038281	0.000177369	230	49	0.0319658	0.118321
PWY-.1319..CDP.diacylglycerol.biosynthesis.II	visit_age_mo	visit_age_mo	0.000596116	0.000596116	0.000276791	230	229	0.0323292	0.119412
PWY-5667..CDP.diacylglycerol.biosynthesis.I	visit_age_mo	visit_age_mo	0.000595374	0.000595374	0.000276868	230	229	0.0325908	0.120122
FERMENTATION.PWY-.mixed.acid.fermentation	probiotics_firstyr	probiotics_firstyr	-0.000992248	0.000992248	0.000463398	230	212	0.0333295	0.122103	FERMENTATION-PWY	SCFA
HISDEG.PWY-.L.histidine.degradation.I	mode_of_delivery	Vaginal	0.00192453	0.00192453	0.000898706	230	213	0.0333131	0.122103
PWY-5862..superpathway.of.demethylmenaquinol.9.biosynthesis	probiotics_firstyr	probiotics_firstyr	-0.000798797	0.000798797	0.000373128	230	192	0.0333646	0.122103
PWY-5897..superpathway.of.menaquinol.11.biosynthesis	probiotics_firstyr	probiotics_firstyr	-0.000785156	0.000785156	0.000367145	230	213	0.0335502	0.122103
PWY-5898..superpathway.of.menaquinol.12.biosynthesis	probiotics_firstyr	probiotics_firstyr	-0.000785156	0.000785156	0.000367145	230	213	0.0335502	0.122103
PWY-5899..superpathway.of.menaquinol.13.biosynthesis	probiotics_firstyr	probiotics_firstyr	-0.000785156	0.000785156	0.000367145	230	213	0.0335502	0.122103
PWY-621..sucrose.degradation.III..sucrose.invertase.	symptoms	AP	-0.00179368	0.00179368	0.00084554	230	228	0.0349871	0.127066
PWY-8131..5..deoxyadenosine.degradation.II	mode_of_delivery	Vaginal	-0.00108892	0.00108892	0.000513597	230	198	0.0350865	0.127161
AST.PWY-.L.arginine.degradation.II..AST.pathway.	probiotics_firstyr	probiotics_firstyr	-0.000670913	0.000670913	0.000316812	230	184	0.0352979	0.127661
PWY-4984..urea.cycle	mode_of_delivery	Vaginal	0.00169709	0.00169709	0.000802967	230	179	0.0356579	0.128695
PWY-5705..allantoin.degradation.to.glyoxylate.III	probiotics_firstyr	probiotics_firstyr	-0.000484639	0.000484639	0.000230379	230	141	0.0365186	0.131528
PWY-5265..peptidoglycan.biosynthesis.II..staphylococci.	probiotics_firstyr	probiotics_firstyr	-0.000731385	0.000731385	0.000348047	230	117	0.0367185	0.131974
PWY-6.391..fatty.acid..beta..oxidation.VI..mammalian.peroxisome.	probiotics_firstyr	probiotics_firstyr	-0.000560167	0.000560167	0.000266832	230	149	0.0369027	0.132362
BRANCHED.CHAIN.AA.SYN.PWY-.superpathway.of.branched.chain.amino.acid.biosynthesis	visit_age_mo	visit_age_mo	-0.000469119	0.000469119	0.000223735	230	230	0.037132	0.132506
GLCMANNANAUT.PWY-.superpathway.of.N.acetylglucosamine..N.acetylmannosamine.and.N.acetylneuraminate.degradation	symptoms	AP	0.00129064	0.00129064	0.000615671	230	228	0.037172	0.132506
PWY-6803..phosphatidylcholine.acyl.editing	probiotics_firstyr	probiotics_firstyr	-0.000792684	0.000792684	0.000377909	230	212	0.0370608	0.132506
PWY-5189..tetrapyrrole.biosynthesis.II..from.glycine.	symptoms	AP	0.00156278	0.00156278	0.000747936	230	196	0.0377909	0.134437
PWY-7228..superpathway.of.guanosine.nucleotides.de.novo.biosynthesis.I	visit_age_mo	visit_age_mo	0.000618944	0.000618944	0.00029636	230	228	0.0378787	0.134473
PWY-6969..TCA.cycle.V..2.oxoglutarate.synthase.	probiotics_firstyr	probiotics_firstyr	-0.000900672	0.000900672	0.000433524	230	196	0.0388849	0.137483
PWY-7268..cytosolic.NADPH.production..yeast.	mode_of_delivery	Vaginal	-0.000580645	0.000580645	0.000279389	230	29	0.0388191	0.137483
PWY-5188..tetrapyrrole.biosynthesis.I..from.glutamate.	probiotics_firstyr	probiotics_firstyr	-0.000791471	0.000791471	0.000382048	230	227	0.0394378	0.139154
PWY-6628..superpathway.of.L.phenylalanine.biosynthesis	visit_age_mo	visit_age_mo	-0.000655914	0.000655914	0.000316991	230	228	0.0396708	0.139693
LACTOSECAT.PWY-.lactose.and.galactose.degradation.I	visit_age_mo	visit_age_mo	-0.000501733	0.000501733	0.000242847	230	201	0.0399691	0.139892
P41.PWY-.pyruvate.fermentation.to.acetate.and..S..lactate.I	visit_age_mo	visit_age_mo	-0.000729109	0.000729109	0.000352704	230	230	0.0398598	0.139892	P41-PWY	SCFA
PWY-7874..L.threonate.degradation	mode_of_delivery	Vaginal	-0.00055043	0.00055043	0.00026633	230	115	0.0399049	0.139892
PWY-5989..stearate.biosynthesis.II..bacteria.and.plants.	visit_age_mo	visit_age_mo	-0.000566183	0.000566183	0.000274691	230	225	0.0404372	0.141245
P441.PWY-.superpathway.of.N.acetylneuraminate.degradation	probiotics_firstyr	probiotics_firstyr	-0.000749049	0.000749049	0.000363652	230	224	0.040569	0.141421
COA.PWY-1..superpathway.of.coenzyme.A.biosynthesis.III..mammals.	visit_age_mo	visit_age_mo	0.000437393	0.000437393	0.000212715	230	230	0.040913	0.142139
PWY-7187..pyrimidine.deoxyribonucleotides.de.novo.biosynthesis.II	probiotics_firstyr	probiotics_firstyr	-0.000624685	0.000624685	0.000303838	230	187	0.0409385	0.142139
PWY-7204..pyridoxal.5..phosphate.salvage.II..plants.	symptoms	AP	0.00132798	0.00132798	0.000646806	230	176	0.041216	0.142536
PWY-6.399..gluconeogenesis.III	probiotics_firstyr	probiotics_firstyr	-0.000737477	0.000737477	0.000359197	230	153	0.0412172	0.142536
PWY-5030..L.histidine.degradation.III	visit_age_mo	visit_age_mo	0.000924319	0.000924319	0.000451077	230	144	0.0416089	0.143605
PWY-621..sucrose.degradation.III..sucrose.invertase.	visit_age_mo	visit_age_mo	-0.000649212	0.000649212	0.000316972	230	228	0.0417045	0.143649
ARGSYN.PWY-.L.arginine.biosynthesis.I..via.L.ornithine.	mode_of_delivery	Vaginal	-0.00124839	0.00124839	0.000616191	230	230	0.0439477	0.150521
HCAMHPDEG.PWY-.3.phenylpropanoate.and.3..3.hydroxyphenyl.propanoate.degradation.to.2.hydroxypentadienoate	visit_age_mo	visit_age_mo	-0.000438876	0.000438876	0.000216995	230	135	0.0443065	0.150521	HCAMHPDEG-PWY	Propiote
NONOXIPENT.PWY-.pentose.phosphate.pathway..non.oxidative.branch..I	visit_age_mo	visit_age_mo	-0.000658301	0.000658301	0.000325266	230	229	0.044164	0.150521
PWY-5677..succinate.fermentation.to.butanoate	probiotics_firstyr	probiotics_firstyr	-0.000309379	0.000309379	0.000152658	230	81	0.0438821	0.150521	PWY-5677	SCFA
PWY-6125..superpathway.of.guanosine.nucleotides.de.novo.biosynthesis.II	visit_age_mo	visit_age_mo	0.00059575	0.00059575	0.000294323	230	228	0.0441382	0.150521
PWY-6690..cinnamate.and.3.hydroxycinnamate.degradation.to.2.hydroxypentadienoate	visit_age_mo	visit_age_mo	-0.000438876	0.000438876	0.000216995	230	135	0.0443065	0.150521
VALSYN.PWY-.L.valine.biosynthesis	visit_age_mo	visit_age_mo	-0.0004221	0.0004221	0.000208584	230	230	0.0441892	0.150521
PWY-6385..peptidoglycan.biosynthesis.III..mycobacteria.	visit_age_mo	visit_age_mo	0.000378805	0.000378805	0.000188115	230	229	0.0452337	0.15337
PWY-6293..superpathway.of.L.cysteine.biosynthesis..fungi.	visit_age_mo	visit_age_mo	0.000346181	0.000346181	0.000172054	230	134	0.0454066	0.153657
PWY-6507..4.deoxy.L.threo.hex.4.enopyranuronate.degradation	mode_of_delivery	Vaginal	-0.000988745	0.000988745	0.000491961	230	224	0.045646	0.154166
P562.PWY-.myo.inositol.degradation.I	mode_of_delivery	Vaginal	-0.000706819	0.000706819	0.00035252	230	96	0.046156	0.154984
PWY-6572..chondroitin.sulfate.degradation.I..bacterial.	mode_of_delivery	Vaginal	0.00125138	0.00125138	0.000623695	230	60	0.0460115	0.154984
PWY-8004..Entner.Doudoroff.pathway.I	probiotics_firstyr	probiotics_firstyr	-0.000655641	0.000655641	0.000326922	230	227	0.0461078	0.154984
DTDPRHAMSYN.PWY-.dTDP..beta..L.rhamnose.biosynthesis	symptoms	AP	-0.00202857	0.00202857	0.00101582	230	229	0.047032	0.157621
ALLANTOINDEG.PWY-.superpathway.of.allantoin.degradation.in.yeast	mode_of_delivery	Vaginal	-0.000365807	0.000365807	0.000183326	230	35	0.0472064	0.1579
PWY-5345..superpathway.of.L.methionine.biosynthesis..by.sulfhydrylation.	probiotics_firstyr	probiotics_firstyr	-0.00078343	0.00078343	0.000393961	230	212	0.0479571	0.159796
SULFATE.CYS.PWY-.superpathway.of.sulfate.assimilation.and.cysteine.biosynthesis	probiotics_firstyr	probiotics_firstyr	-0.000814356	0.000814356	0.000409471	230	213	0.0479349	0.159796
BIOTIN.BIOSYNTHESIS.PWY-.biotin.biosynthesis.I	visit_age_mo	visit_age_mo	-0.000527252	0.000527252	0.000265536	230	224	0.0482906	0.160599
HEXITOLDEGSUPER.PWY-.superpathway.of.hexitol.degradation..bacteria.	visit_age_mo	visit_age_mo	-0.000695123	0.000695123	0.000350289	230	179	0.0484231	0.160732
PWY-6284..superpathway.of.unsaturated.fatty.acids.biosynthesis..E..coli.	symptoms	AP	0.0016341	0.0016341	0.000824575	230	183	0.048725	0.161234
PWY-7185..UTP.and.CTP.dephosphorylation.I	visit_age_mo	visit_age_mo	-0.00098391	0.00098391	0.000496763	230	154	0.0488494	0.161234
PWY-7805...aminomethyl.phosphonate.degradation	mode_of_delivery	Vaginal	-0.000590216	0.000590216	0.000297997	230	56	0.0488531	0.161234
PWY-.1298..superpathway.of.pyrimidine.deoxyribonucleosides.degradation	probiotics_firstyr	probiotics_firstyr	-0.0006927	0.0006927	0.000351486	230	228	0.0499752	0.164624
PWY-7942..5.oxo.L.proline.metabolism	probiotics_firstyr	probiotics_firstyr	-0.000630354	0.000630354	0.000320715	230	174	0.0505907	0.166336
PWY-5180..toluene.degradation.I..aerobic...via.o.cresol.	visit_age_mo	visit_age_mo	-0.000322805	0.000322805	0.000164411	230	29	0.0508312	0.166811
PWY-5862..superpathway.of.demethylmenaquinol.9.biosynthesis	mode_of_delivery	Vaginal	-0.00117794	0.00117794	0.000600608	230	192	0.0510832	0.167006
PWY-6285..superpathway.of.fatty.acids.biosynthesis..E..coli.	symptoms	AP	0.00189459	0.00189459	0.000965986	230	176	0.0510769	0.167006
PWY-5973..cis.vaccenate.biosynthesis	visit_age_mo	visit_age_mo	0.000488654	0.000488654	0.000249949	230	229	0.0518195	0.169095
PWY-6901..superpathway.of.glucose.and.xylose.degradation	mode_of_delivery	Vaginal	-0.000858277	0.000858277	0.000439383	230	228	0.0520153	0.169416
GLYCOGENSYNTH.PWY-.glycogen.biosynthesis.I..from.ADP.D.Glucose.	mode_of_delivery	Vaginal	-0.00108385	0.00108385	0.000555456	230	230	0.052265	0.16991
PWY-7851..coenzyme.A.biosynthesis.II..eukaryotic.	visit_age_mo	visit_age_mo	0.000425295	0.000425295	0.000218155	230	230	0.0524776	0.170283
PWY-5971..palmitate.biosynthesis..type.II.fatty.acid.synthase.	mode_of_delivery	Vaginal	-0.00171016	0.00171016	0.000878918	230	195	0.05293	0.17143
PWY-7761..NAD.salvage.pathway.II..PNC.IV.cycle.	visit_age_mo	visit_age_mo	-0.000430031	0.000430031	0.000221155	230	225	0.0530839	0.171608
GLYCOLYSIS.E.D..superpathway.of.glycolysis.and.the.Entner.Doudoroff.pathway	visit_age_mo	visit_age_mo	-0.000509292	0.000509292	0.000262354	230	224	0.0534781	0.171922
PWY-7616..methanol.oxidation.to.carbon.dioxide	mode_of_delivery	Vaginal	-0.000267184	0.000267184	0.000137589	230	39	0.0533979	0.171922
PWY-7883..anhydromuropeptides.recycling.II	probiotics_firstyr	probiotics_firstyr	-0.000541597	0.000541597	0.000278971	230	189	0.0534573	0.171922
PWY-7237..myo...chiro..and.scyllo.inositol.degradation	symptoms	AP	0.00313174	0.00313174	0.00161446	230	172	0.053653	0.172166
PWY-5837..2.carboxy.1.4.naphthoquinol.biosynthesis	probiotics_firstyr	probiotics_firstyr	-0.000616434	0.000616434	0.000318273	230	213	0.0540206	0.173025
UNINTEGRATED	symptoms	AP	-0.0243784	0.0243784	0.0125939	230	230	0.0541531	0.17313
PWY-6895..superpathway.of.thiamine.diphosphate.biosynthesis.II	mode_of_delivery	Vaginal	-0.00128522	0.00128522	0.000666892	230	212	0.055216	0.176204
P125.PWY-.superpathway.of..R.R..butanediol.biosynthesis	visit_age_mo	visit_age_mo	0.000241184	0.000241184	0.000125208	230	107	0.0553318	0.176249
PWY-8131..5..deoxyadenosine.degradation.II	probiotics_firstyr	probiotics_firstyr	-0.000614317	0.000614317	0.000319072	230	198	0.0554495	0.176301
HEME.BIOSYNTHESIS.II.1..heme.b.biosynthesis.V..aerobic.	probiotics_firstyr	probiotics_firstyr	-0.000706538	0.000706538	0.000368184	230	213	0.056252	0.178491
PWY-8086...S..lactate.fermentation.to.propanoate..acetate.and.hydrogen	mode_of_delivery	Vaginal	-0.000424146	0.000424146	0.00022111	230	41	0.056344	0.178491	PWY-8086	SCFA
PENTOSE.P.PWY-.pentose.phosphate.pathway	visit_age_mo	visit_age_mo	-0.000436751	0.000436751	0.000228694	230	229	0.0574353	0.181287
PWY-7210..pyrimidine.deoxyribonucleotides.biosynthesis.from.CTP	probiotics_firstyr	probiotics_firstyr	0.000924755	0.000924755	0.000484042	230	154	0.0573422	0.181287
HEXITOLDEGSUPER.PWY-.superpathway.of.hexitol.degradation..bacteria.	mode_of_delivery	Vaginal	-0.00143508	0.00143508	0.000752295	230	179	0.0577151	0.18151
PWY-7323..superpathway.of.GDP.mannose.derived.O.antigen.building.blocks.biosynthesis	symptoms	AP	0.00138998	0.00138998	0.000728496	230	208	0.0576621	0.18151
PWY-7115..C4.photosynthetic.carbon.assimilation.cycle..NAD.ME.type	probiotics_firstyr	probiotics_firstyr	-0.000596116	0.000596116	0.000314051	230	223	0.058956	0.185077
PWY-5705..allantoin.degradation.to.glyoxylate.III	visit_age_mo	visit_age_mo	-0.000326474	0.000326474	0.000172669	230	141	0.0599429	0.187835
PWY-5676..acetyl.CoA.fermentation.to.butanoate.II	symptoms	AP	0.00132142	0.00132142	0.000699451	230	203	0.0601474	0.188137	PWY-5676	SCFA
PWY-5497..purine.nucleobases.degradation.II..anaerobic.	visit_age_mo	visit_age_mo	0.000415112	0.000415112	0.000219883	230	197	0.0603288	0.188365
PWY-7184..pyrimidine.deoxyribonucleotides.de.novo.biosynthesis.I	mode_of_delivery	Vaginal	-0.00121836	0.00121836	0.000646433	230	208	0.0607531	0.189349
PWY-5837..2.carboxy.1.4.naphthoquinol.biosynthesis	mode_of_delivery	Vaginal	-0.000964766	0.000964766	0.00051231	230	213	0.0609677	0.189677
X3.HYDROXYPHENYLACETATE.DEGRADATION.PWY-.4.hydroxyphenylacetate.degradation	visit_age_mo	visit_age_mo	-0.000285867	0.000285867	0.000152074	230	76	0.0614297	0.190398	3-HYDROXYPHENYLACETATE-DEGRADATION-PWY	Acetate
PWY-7315..dTDP.N.acetylthomosamine.biosynthesis	probiotics_firstyr	probiotics_firstyr	-0.000586536	0.000586536	0.000312142	230	194	0.0615283	0.190398
PWY-.1221..putrescine.degradation.II	mode_of_delivery	Vaginal	-0.000399201	0.000399201	0.000212387	230	54	0.0614555	0.190398
PWY-5973..cis.vaccenate.biosynthesis	probiotics_firstyr	probiotics_firstyr	-0.00062543	0.00062543	0.000333487	230	229	0.0620297	0.191608
PWY-6215..4.chlorobenzoate.degradation	probiotics_firstyr	probiotics_firstyr	-0.000116468	0.000116468	6.21812e-05	230	24	0.0623584	0.19194
PWY-7874..L.threonate.degradation	visit_age_mo	visit_age_mo	-0.000232346	0.000232346	0.00012401	230	115	0.0622813	0.19194
PWY-7409..phospholipid.remodeling..phosphatidylethanolamine..yeast.	symptoms	AP	0.000904257	0.000904257	0.000483857	230	126	0.0629429	0.193055
REDCITCYC..TCA.cycle.VI..Helicobacter.	probiotics_firstyr	probiotics_firstyr	-0.000505671	0.000505671	0.000270512	230	123	0.0628791	0.193055
PWY-5154..L.arginine.biosynthesis.III..via.N.acetyl.L.citrulline.	symptoms	AP	0.00119904	0.00119904	0.000643251	230	229	0.0636197	0.194786
PWY-6629..superpathway.of.L.tryptophan.biosynthesis	visit_age_mo	visit_age_mo	0.000346168	0.000346168	0.00018598	230	229	0.0640024	0.195269
PWY-.1415..superpathway.of.heme.b.biosynthesis.from.uroporphyrinogen.III	probiotics_firstyr	probiotics_firstyr	-0.0006546	0.0006546	0.000351569	230	206	0.0639153	0.195269
PWY-6606..guanosine.nucleotides.degradation.II	mode_of_delivery	Vaginal	-0.00117874	0.00117874	0.000633824	230	223	0.0642286	0.195273
PWY-7874..L.threonate.degradation	probiotics_firstyr	probiotics_firstyr	-0.000307824	0.000307824	0.000165457	230	115	0.064128	0.195273
PWY-.301..L.ascorbate.degradation.I..bacterial..anaerobic.	probiotics_firstyr	probiotics_firstyr	-0.000702162	0.000702162	0.000377816	230	217	0.0644076	0.195475
ARGININE.SYN4.PWY-.L.ornithine.biosynthesis.II	visit_age_mo	visit_age_mo	0.000685162	0.000685162	0.000369027	230	223	0.0646653	0.195914
P461.PWY-.hexitol.fermentation.to.lactate..formate..ethanol.and.acetate	probiotics_firstyr	probiotics_firstyr	-0.00080286	0.00080286	0.00043435	230	225	0.0658541	0.198822	P461-PWY	SCFA
PWY-5659..GDP.mannose.biosynthesis	visit_age_mo	visit_age_mo	0.000441342	0.000441342	0.000238749	230	228	0.0658334	0.198822
P42.PWY-.incomplete.reductive.TCA.cycle	probiotics_firstyr	probiotics_firstyr	-0.000525147	0.000525147	0.00028453	230	191	0.0662546	0.199684
FOLSYN.PWY-.superpathway.of.tetrahydrofolate.biosynthesis.and.salvage	mode_of_delivery	Vaginal	-0.00103329	0.00103329	0.000561135	230	202	0.0668746	0.200653
PWY-6531..mannitol.cycle	mode_of_delivery	Vaginal	-0.00107026	0.00107026	0.000581256	230	207	0.0668961	0.200653
PWY-6.391..fatty.acid..beta..oxidation.VI..mammalian.peroxisome.	mode_of_delivery	Vaginal	-0.000790767	0.000790767	0.000429507	230	149	0.066923	0.200653
PWY-5677..succinate.fermentation.to.butanoate	mode_of_delivery	Vaginal	-0.000451558	0.000451558	0.000245727	230	81	0.0674343	0.201838	PWY-5677	SCFA
PWY-6549..L.glutamine.biosynthesis.III	visit_age_mo	visit_age_mo	0.000413493	0.000413493	0.000225215	230	167	0.0676786	0.20222
PWY-5855..ubiquinol.7.biosynthesis..early.decarboxylation.	symptoms	AP	0.000872737	0.000872737	0.000475991	230	170	0.0680468	0.202971
P562.PWY-.myo.inositol.degradation.I	visit_age_mo	visit_age_mo	-0.000300542	0.000300542	0.000164143	230	96	0.0684262	0.203056
PWY-6961..L.ascorbate.degradation.II..bacterial..aerobic.	symptoms	AP	0.00145384	0.00145384	0.00079378	230	196	0.068342	0.203056
PWY-.166..superpathway.of.pyrimidine.deoxyribonucleotides.de.novo.biosynthesis..E..coli.	probiotics_firstyr	probiotics_firstyr	-0.000647654	0.000647654	0.000353451	230	197	0.0682181	0.203056
GLUCUROCAT.PWY-.superpathway.of..beta..D.glucuronosides.degradation	mode_of_delivery	Vaginal	-0.000954386	0.000954386	0.000523021	230	215	0.069364	0.205138
PWY-5705..allantoin.degradation.to.glyoxylate.III	mode_of_delivery	Vaginal	-0.000676964	0.000676964	0.000370831	230	141	0.0692465	0.205138
PWY-5180..toluene.degradation.I..aerobic...via.o.cresol.	probiotics_firstyr	probiotics_firstyr	-0.000400056	0.000400056	0.000219361	230	29	0.0695185	0.205245
PWY-O.4107..NAD.salvage.pathway.V..PNC.V.cycle.	visit_age_mo	visit_age_mo	-0.000553368	0.000553368	0.000304663	230	214	0.0706512	0.208235
KDO.NAGLIPASYN.PWY-.superpathway.of..Kdo.2.lipid.A.biosynthesis	mode_of_delivery	Vaginal	-0.000729754	0.000729754	0.000402235	230	142	0.0709716	0.208472
PWY-5656..mannosylglycerate.biosynthesis.I	symptoms	AP	0.00124043	0.00124043	0.00068355	230	163	0.070904	0.208472
HISDEG.PWY-.L.histidine.degradation.I	visit_age_mo	visit_age_mo	0.000758322	0.000758322	0.000418462	230	213	0.0712936	0.209064
PWY-2942..L.lysine.biosynthesis.III	mode_of_delivery	Vaginal	0.00125782	0.00125782	0.000694822	230	226	0.071587	0.20957
GLYCOLYSIS.TCA.GLYOX.BYPASS..superpathway.of.glycolysis..pyruvate.dehydrogenase..TCA..and.glyoxylate.bypass	symptoms	AP	0.0011516	0.0011516	0.000636578	230	111	0.0717792	0.209779
ARGDEG.PWY-.superpathway.of.L.arginine..putrescine..and.4.aminobutanoate.degradation	symptoms	AP	-0.000748451	0.000748451	0.000414465	230	57	0.0722823	0.209836
HEME.BIOSYNTHESIS.II..heme.b.biosynthesis.I..aerobic.	probiotics_firstyr	probiotics_firstyr	-0.000620024	0.000620024	0.000342974	230	220	0.0719751	0.209836
NONMEVIPP.PWY-.methylerythritol.phosphate.pathway.I	mode_of_delivery	Vaginal	0.000781179	0.000781179	0.000432427	230	230	0.0721766	0.209836
ORNARGDEG.PWY-.superpathway.of.L.arginine.and.L.ornithine.degradation	symptoms	AP	-0.000748451	0.000748451	0.000414465	230	57	0.0722823	0.209836
COLANSYN.PWY-.colanic.acid.building.blocks.biosynthesis	symptoms	AP	0.0012366	0.0012366	0.000685242	230	220	0.072471	0.210033
PWY-.461..L.lysine.degradation.I	symptoms	AP	0.000834837	0.000834837	0.000464701	230	129	0.073756	0.213401
PWY-6215..4.chlorobenzoate.degradation	mode_of_delivery	Vaginal	-0.000179633	0.000179633	0.00010009	230	24	0.0740427	0.213874
PWY-702..L.methionine.biosynthesis.II	mode_of_delivery	Vaginal	-0.00140829	0.00140829	0.000787392	230	230	0.0750317	0.216371
PWY-7456...beta...1.4..mannan.degradation	mode_of_delivery	Vaginal	0.00102526	0.00102526	0.000573917	230	118	0.0753773	0.217007
CARNMET.PWY-.L.carnitine.degradation.I	mode_of_delivery	Vaginal	-0.000552408	0.000552408	0.000310231	230	139	0.0763211	0.218525
DENITRIFICATION.PWY-.nitrate.reduction.I..denitrification.	symptoms	AP	-0.000313636	0.000313636	0.000176389	230	28	0.0767386	0.218525
LACTOSECAT.PWY-.lactose.and.galactose.degradation.I	mode_of_delivery	Vaginal	-0.00092605	0.00092605	0.000521548	230	201	0.077154	0.218525
ORNDEG.PWY-.superpathway.of.ornithine.degradation	probiotics_firstyr	probiotics_firstyr	-0.000836086	0.000836086	0.00047095	230	198	0.0771971	0.218525
P105.PWY-.TCA.cycle.IV..2.oxoglutarate.decarboxylase.	probiotics_firstyr	probiotics_firstyr	-0.000708343	0.000708343	0.000397805	230	174	0.0763224	0.218525
P108.PWY-.pyruvate.fermentation.to.propanoate.I	symptoms	AP	0.000937552	0.000937552	0.000527988	230	163	0.0771326	0.218525	P108-PWY	SCFA
PWY-5265..peptidoglycan.biosynthesis.II..staphylococci.	mode_of_delivery	Vaginal	-0.000994718	0.000994718	0.000560236	230	117	0.0771612	0.218525
PWY-6612..superpathway.of.tetrahydrofolate.biosynthesis	mode_of_delivery	Vaginal	-0.000902213	0.000902213	0.000507655	230	202	0.0768835	0.218525
PWY-6992..1.5.anhydrofructose.degradation	probiotics_firstyr	probiotics_firstyr	0.000497604	0.000497604	0.000280378	230	87	0.0772895	0.218525
PWY-7238..sucrose.biosynthesis.II	visit_age_mo	visit_age_mo	-0.000643129	0.000643129	0.000361683	230	230	0.0767282	0.218525
SER.GLYSYN.PWY-.superpathway.of.L.serine.and.glycine.biosynthesis.I	visit_age_mo	visit_age_mo	-0.000358705	0.000358705	0.000201864	230	230	0.0769252	0.218525
PWY-7234..inosine.5..phosphate.biosynthesis.III	visit_age_mo	visit_age_mo	-0.00049295	0.00049295	0.000277884	230	225	0.0774254	0.218554
GLUCONEO.PWY-.gluconeogenesis.I	probiotics_firstyr	probiotics_firstyr	-0.000487068	0.000487068	0.000275955	230	229	0.0789165	0.222401
POLYAMINSYN3.PWY-.superpathway.of.polyamine.biosynthesis.II	visit_age_mo	visit_age_mo	0.000202688	0.000202688	0.000115129	230	36	0.0796771	0.224017
PWY-5367..petroselinate.biosynthesis	symptoms	AP	0.000974992	0.000974992	0.000553938	230	183	0.079748	0.224017
PWY-5659..GDP.mannose.biosynthesis	symptoms	AP	0.00111903	0.00111903	0.000636877	230	228	0.0802685	0.224769
PWY-7873..D.erythronate.degradation.II	visit_age_mo	visit_age_mo	-0.000197728	0.000197728	0.000112536	230	73	0.0802746	0.224769
SALVADEHYPOX.PWY-.adenosine.nucleotides.degradation.II	probiotics_firstyr	probiotics_firstyr	-0.000994449	0.000994449	0.000567438	230	214	0.0810456	0.226562
PWY-7357..thiamine.phosphate.formation.from.pyrithiamine.and.oxythiamine..yeast.	visit_age_mo	visit_age_mo	0.000404124	0.000404124	0.000230959	230	229	0.081522	0.2275
PWY-.1277..3.phenylpropanoate.and.3..3.hydroxyphenyl.propanoate.degradation	visit_age_mo	visit_age_mo	-0.000422981	0.000422981	0.000241832	230	126	0.0816432	0.2275
HEMESYN2.PWY-.heme.b.biosynthesis.II..oxygen.independent.	probiotics_firstyr	probiotics_firstyr	-0.00062181	0.00062181	0.000355685	230	224	0.0817928	0.227552
PWY-5840..superpathway.of.menaquinol.7.biosynthesis	mode_of_delivery	Vaginal	-0.00104898	0.00104898	0.000601729	230	202	0.0826515	0.229573
DTDPRHAMSYN.PWY-.dTDP..beta..L.rhamnose.biosynthesis	visit_age_mo	visit_age_mo	0.00066134	0.00066134	0.000380805	230	229	0.0838109	0.231413
GALACTITOLCAT.PWY-.galactitol.degradation	mode_of_delivery	Vaginal	-0.00115596	0.00115596	0.00066598	230	182	0.0839806	0.231413
P41.PWY-.pyruvate.fermentation.to.acetate.and..S..lactate.I	mode_of_delivery	Vaginal	-0.00131686	0.00131686	0.000757483	230	230	0.0834958	0.231413	P41-PWY	SCFA
PWY-7805...aminomethyl.phosphonate.degradation	visit_age_mo	visit_age_mo	-0.000240871	0.000240871	0.000138755	230	56	0.0839437	0.231413
PYRIDNUCSYN.PWY-.NAD.de.novo.biosynthesis.I..from.aspartate.	symptoms	AP	-0.00104199	0.00104199	0.000600191	230	230	0.0839153	0.231413
PWY-7400..L.arginine.biosynthesis.IV..archaebacteria.	probiotics_firstyr	probiotics_firstyr	-0.000642976	0.000642976	0.00037117	230	227	0.084591	0.232726
LIPA.CORESYN.PWY-.lipid.A.core.biosynthesis..E..coli.K.12.	symptoms	AP	-0.000534528	0.000534528	0.000308845	230	48	0.0848711	0.233127
PWY-8187..L.arginine.degradation.XIII..reductive.Stickland.reaction.	symptoms	AP	0.00135925	0.00135925	0.000786064	230	224	0.0851477	0.233517
GALACTUROCAT.PWY-.D.galacturonate.degradation.I	mode_of_delivery	Vaginal	-0.000820307	0.000820307	0.000474614	230	223	0.0852942	0.23355
PWY-7165..L.ascorbate.biosynthesis.VIII..engineered.pathway.	mode_of_delivery	Vaginal	-0.000538389	0.000538389	0.000311715	230	34	0.085507	0.233764
PWY-6182..superpathway.of.salicylate.degradation	symptoms	AP	-0.00053146	0.00053146	0.00030803	230	40	0.0858373	0.234298
PWY-6545..pyrimidine.deoxyribonucleotides.de.novo.biosynthesis.III	mode_of_delivery	Vaginal	-0.00094083	0.00094083	0.000546036	230	194	0.0862592	0.23508
KETOGLUCONMET.PWY-.ketogluconate.metabolism	symptoms	AP	0.00140334	0.00140334	0.000817229	230	194	0.0873204	0.237599
PWY-5100..pyruvate.fermentation.to.acetate.and.lactate.II	mode_of_delivery	Vaginal	-0.00127436	0.00127436	0.000744256	230	230	0.0882272	0.239316	PWY-5100	SCFA
SO4ASSIM.PWY-.assimilatory.sulfate.reduction.I	probiotics_firstyr	probiotics_firstyr	-0.000714875	0.000714875	0.000417424	230	213	0.0881659	0.239316
PWY-5675..nitrate.reduction.V..assimilatory.	probiotics_firstyr	probiotics_firstyr	-0.000748704	0.000748704	0.00043767	230	190	0.0885222	0.239742
AEROBACTINSYN.PWY-.aerobactin.biosynthesis	visit_age_mo	visit_age_mo	-0.000261726	0.000261726	0.000153106	230	56	0.088747	0.23995
PWY-2221..Entner.Doudoroff.pathway.III..semi.phosphorylative.	symptoms	AP	0.000239217	0.000239217	0.000139995	230	12	0.0888754	0.23995
PHOSLIPSYN.PWY-.superpathway.of.phospholipid.biosynthesis.I..bacteria.	probiotics_firstyr	probiotics_firstyr	-0.000610829	0.000610829	0.000358062	230	228	0.0894006	0.240993
PWY-5840..superpathway.of.menaquinol.7.biosynthesis	probiotics_firstyr	probiotics_firstyr	-0.000637374	0.000637374	0.000373824	230	202	0.0895727	0.241083
PWY-5188..tetrapyrrole.biosynthesis.I..from.glutamate.	symptoms	AP	0.00129994	0.00129994	0.000763841	230	227	0.0901663	0.242304
PWY-621..sucrose.degradation.III..sucrose.invertase.	probiotics_firstyr	probiotics_firstyr	0.000717409	0.000717409	0.000422911	230	228	0.0912008	0.244706
PWY-6630..superpathway.of.L.tyrosine.biosynthesis	mode_of_delivery	Vaginal	-0.00106281	0.00106281	0.000627629	230	224	0.0917683	0.24547
PWY-6906..chitin.derivatives.degradation	visit_age_mo	visit_age_mo	0.000511684	0.000511684	0.000302043	230	66	0.0916344	0.24547
UNMAPPED	symptoms	AP	0.025187	0.025187	0.0148849	230	230	0.0920074	0.245731
PWY-5028..L.histidine.degradation.II	symptoms	AP	0.000725079	0.000725079	0.000429037	230	84	0.0924096	0.246048
PWY-5676..acetyl.CoA.fermentation.to.butanoate.II	mode_of_delivery	Vaginal	-0.000951998	0.000951998	0.000563126	230	203	0.0923055	0.246048	PWY-5676	SCFA
PWY-7783..plasmalogen.degradation	visit_age_mo	visit_age_mo	-7.7952e-05	7.7952e-05	4.6262e-05	230	15	0.093373	0.248232
GLUTORN.PWY-.L.ornithine.biosynthesis.I	mode_of_delivery	Vaginal	-0.000991474	0.000991474	0.000589529	230	230	0.0939936	0.249119
P185.PWY-.formaldehyde.assimilation.III..dihydroxyacetone.cycle.	mode_of_delivery	Vaginal	-0.000969512	0.000969512	0.000576273	230	182	0.0938817	0.249119
P125.PWY-.superpathway.of..R.R..butanediol.biosynthesis	symptoms	AP	-0.000560996	0.000560996	0.000334	230	107	0.0944175	0.249861
