# Supplementary material for: Strain-Level microbial signatures and inferred functional alterations in infants with Food Protein-Induced Allergic Proctocolitis
Source: Research Square preprint supplement (doi:10.21203/rs.3.rs-7112201/v1), 2025-08-27
Supplement: Supplementary file 8 [file 9d64257322cb5b5fcf1a7232.xlsx]

## Sheet: significant_results_spc_0-2
feature	metadata	value	coef	stderr	N	N.not.0	pval	qval
g__Staphylococcus.s__Staphylococcus_epidermidis	visit_age_mo	visit_age_mo	-0.035212	0.00533412	293	162	1.95681e-10	2.42645e-08
g__Staphylococcus.s__Staphylococcus_hominis	visit_age_mo	visit_age_mo	-0.0124623	0.00321818	293	91	0.000133377	0.00721429
g__Streptococcus.s__Streptococcus_salivarius	visit_age_mo	visit_age_mo	-0.0440443	0.0115814	293	250	0.000174539	0.00721429
g__Eggerthella.s__Eggerthella_lenta	visit_age_mo	visit_age_mo	0.00764054	0.00221026	293	67	0.000628934	0.0111411
g__Bacteroides.s__Bacteroides_uniformis	mode_of_delivery	Vaginal	0.082222	0.0229568	293	73	0.000400753	0.0111411
g__Parabacteroides.s__Parabacteroides_distasonis	mode_of_delivery	Vaginal	0.0837124	0.024067	293	64	0.00058257	0.0111411
g__Veillonella.s__Veillonella_parvula	mode_of_delivery	Vaginal	-0.134452	0.0380586	293	135	0.000478802	0.0111411
g__Rothia.s__Rothia_mucilaginosa	probiotics_firstyr	probiotics_firstyr	0.0100887	0.00304292	293	150	0.00103212	0.013204
g__Streptococcus.s__Streptococcus_salivarius	mode_of_delivery	Vaginal	-0.0853717	0.0255271	293	250	0.000933996	0.013204
g__Clostridium.s__Clostridium_perfringens	mode_of_delivery	Vaginal	-0.0634755	0.0191978	293	92	0.00106484	0.013204
g__Bacteroides.s__Bacteroides_fragilis	mode_of_delivery	Vaginal	0.0950058	0.0308066	293	58	0.00224099	0.0213756
g__Bacteroides.s__Bacteroides_thetaiotaomicron	mode_of_delivery	Vaginal	0.0786906	0.0253422	293	60	0.00209141	0.0213756
g__Streptococcus.s__Streptococcus_parasanguinis	mode_of_delivery	Vaginal	-0.0247161	0.00791133	293	118	0.00196506	0.0213756
g__Escherichia.s__Escherichia_coli	probiotics_firstyr	probiotics_firstyr	-0.085863	0.0292603	293	185	0.00361028	0.0299091
g__Klebsiella.s__Klebsiella_pneumoniae	visit_age_mo	visit_age_mo	0.0278612	0.00949671	293	60	0.00361803	0.0299091
g__Lacticaseibacillus.s__Lacticaseibacillus_rhamnosus	visit_age_mo	visit_age_mo	0.0305286	0.0105789	293	80	0.00419958	0.0325467
g__Enterococcus.s__Enterococcus_faecalis	visit_age_mo	visit_age_mo	-0.0223681	0.00787452	293	175	0.00482453	0.0350447
g__Escherichia.s__Escherichia_coli	state	AP	0.168206	0.0595813	293	185	0.00508714	0.0350447
g__Phocaeicola.s__Phocaeicola_dorei	mode_of_delivery	Vaginal	0.0620736	0.0224161	293	50	0.00598513	0.0390609
g__Streptococcus.s__Streptococcus_parasanguinis	visit_age_mo	visit_age_mo	-0.00985327	0.00358931	293	118	0.00642812	0.0398544
g__Clostridium.s__Clostridium_paraputrificum	probiotics_firstyr	probiotics_firstyr	0.0296518	0.0109263	293	46	0.00705256	0.0416437
g__Erysipelatoclostridium.s__Erysipelatoclostridium_ramosum	probiotics_firstyr	probiotics_firstyr	-0.020119	0.00749612	293	55	0.00769759	0.0433864
g__Klebsiella.s__Klebsiella_pneumoniae	mode_of_delivery	Vaginal	-0.0542124	0.0209321	293	60	0.010088	0.0543874
g__Bifidobacterium.s__Bifidobacterium_longum	visit_age_mo	visit_age_mo	0.0471989	0.0185726	293	116	0.0115682	0.0573781
g__Enterococcus.s__Enterococcus_faecalis	mode_of_delivery	Vaginal	-0.044185	0.0173565	293	175	0.0114261	0.0573781
g__Phocaeicola.s__Phocaeicola_dorei	probiotics_firstyr	probiotics_firstyr	-0.0302023	0.0120129	293	50	0.012477	0.0586188
g__Clostridium.s__Clostridium_paraputrificum	state	AP	-0.0554612	0.0222487	293	46	0.0132365	0.0586188
g__Veillonella.s__Veillonella_atypica	mode_of_delivery	Vaginal	-0.040846	0.0163407	293	82	0.012988	0.0586188
g__Phocaeicola.s__Phocaeicola_vulgatus	mode_of_delivery	Vaginal	0.0817769	0.0331222	293	75	0.0141316	0.0604246
g__Bifidobacterium.s__Bifidobacterium_bifidum	state	AP	0.066625	0.0290017	293	45	0.0223199	0.0922556
g__Lacticaseibacillus.s__Lacticaseibacillus_rhamnosus	probiotics_firstyr	probiotics_firstyr	0.0282456	0.0124959	293	80	0.0245434	0.0981735
g__Streptococcus.s__Streptococcus_parasanguinis	state	AP	-0.0179498	0.00863312	293	118	0.0384859	0.146987
g__Erysipelatoclostridium.s__Erysipelatoclostridium_ramosum	visit_age_mo	visit_age_mo	0.0131518	0.00634617	293	55	0.0391176	0.146987
g__Enterococcus.s__Enterococcus_faecalis	probiotics_firstyr	probiotics_firstyr	0.019045	0.00930142	293	175	0.0415124	0.151398
g__Clostridium.s__Clostridium_perfringens	visit_age_mo	visit_age_mo	0.0175355	0.0087099	293	92	0.0450152	0.159483
g__Bifidobacterium.s__Bifidobacterium_bifidum	visit_age_mo	visit_age_mo	0.0224617	0.0120577	293	45	0.0635022	0.201973
g__Staphylococcus.s__Staphylococcus_epidermidis	mode_of_delivery	Vaginal	-0.0221172	0.0117571	293	162	0.0609568	0.201973
g__Enterococcus.s__Enterococcus_faecalis	state	AP	-0.0352794	0.01894	293	175	0.0635239	0.201973
g__Mediterraneibacter.s__Ruminococcus_gnavus	visit_age_mo	visit_age_mo	0.0165184	0.00875488	293	65	0.0601982	0.201973
g__Bacteroides.s__Bacteroides_fragilis	visit_age_mo	visit_age_mo	-0.0254575	0.0139767	293	58	0.0695793	0.210435
g__Bacteroides.s__Bacteroides_thetaiotaomicron	state	AP	-0.0504271	0.0276542	293	60	0.069266	0.210435
g__Streptococcus.s__Streptococcus_parasanguinis	probiotics_firstyr	probiotics_firstyr	0.00764574	0.00423971	293	118	0.0723761	0.213682
g__Bifidobacterium.s__Bifidobacterium_bifidum	mode_of_delivery	Vaginal	0.0475586	0.0265769	293	45	0.0745902	0.215097
g__Phocaeicola.s__Phocaeicola_vulgatus	visit_age_mo	visit_age_mo	0.0265195	0.0150273	293	75	0.0786648	0.221692
g__Klebsiella.s__Klebsiella_michiganensis	state	AP	-0.0525832	0.0300127	293	49	0.080833	0.22274
g__Parabacteroides.s__Parabacteroides_distasonis	probiotics_firstyr	probiotics_firstyr	-0.0217929	0.0128976	293	64	0.0921701	0.239092
g__Staphylococcus.s__Staphylococcus_epidermidis	state	AP	-0.0218441	0.0128298	293	162	0.0897198	0.239092
g__Streptococcus.s__Streptococcus_mitis	visit_age_mo	visit_age_mo	-0.00505275	0.00301162	293	152	0.0944801	0.239092
g__Mediterraneibacter.s__Ruminococcus_gnavus	mode_of_delivery	Vaginal	0.0324924	0.019297	293	65	0.0933019	0.239092
g__Streptococcus.s__Streptococcus_thermophilus	mode_of_delivery	Vaginal	-0.00770477	0.00463753	293	71	0.0977219	0.24235
g__Lacticaseibacillus.s__Lacticaseibacillus_rhamnosus	state	AP	0.0409579	0.0254448	293	80	0.108564	0.263959

## Sheet: Pre-symptomatic - species level
feature	metadata	value	coef	stderr	N	N.not.0	pval	qval
g__Klebsiella.s__Klebsiella_pneumoniae	visit_age_mo	visit_age_mo	0.098604	0.01955	92	19	2.46917e-06	0.000296301
g__Clostridium.s__Clostridium_perfringens	mode_of_delivery	Vaginal	-0.102147	0.0321479	92	22	0.00205748	0.123449
g__Veillonella.s__Veillonella_parvula	mode_of_delivery	Vaginal	-0.176458	0.0595817	92	40	0.00394464	0.157786
g__Klebsiella.s__Klebsiella_michiganensis	probiotics_firstyr	probiotics_firstyr	0.0899174	0.0316272	92	16	0.00556767	0.16703
g__Klebsiella.s__Klebsiella_michiganensis	symptoms	Pre-	-0.165184	0.0629654	92	16	0.010279	0.246696
g__Staphylococcus.s__Staphylococcus_epidermidis	visit_age_mo	visit_age_mo	-0.0357036	0.0142059	92	63	0.0138034	0.269557
g__Veillonella.s__Veillonella_atypica	mode_of_delivery	Vaginal	-0.0751532	0.0305057	92	33	0.0157242	0.269557

## Sheet: Symptomatic - species level
feature	metadata	value	coef	stderr	N	N.not.0	pval	qval
g__Cutibacterium.s__Cutibacterium_avidum	symptoms	Symptomatic	-0.0386357	0.0135124	132	27	0.00496484	0.204188
g__Cutibacterium.s__Cutibacterium_avidum	probiotics_firstyr	probiotics_firstyr	0.0176883	0.00668857	132	27	0.00921192	0.204188
g__Eggerthella.s__Eggerthella_lenta	visit_age_mo	visit_age_mo	0.0082841	0.00284293	132	39	0.00421897	0.204188
g__Bacteroides.s__Bacteroides_uniformis	mode_of_delivery	Vaginal	0.0915618	0.0354572	132	36	0.0109479	0.204188
g__Parabacteroides.s__Parabacteroides_distasonis	mode_of_delivery	Vaginal	0.0706632	0.0251192	132	28	0.00568723	0.204188
g__Staphylococcus.s__Staphylococcus_epidermidis	visit_age_mo	visit_age_mo	-0.0129401	0.0050103	132	46	0.0109363	0.204188
g__Staphylococcus.s__Staphylococcus_epidermidis	probiotics_firstyr	probiotics_firstyr	0.0139816	0.00553478	132	46	0.0127617	0.204188
g__Enterococcus.s__Enterococcus_faecalis	visit_age_mo	visit_age_mo	-0.0224768	0.00876412	132	85	0.0114918	0.204188
g__Escherichia.s__Escherichia_coli	probiotics_firstyr	probiotics_firstyr	-0.103928	0.0397496	132	88	0.0100146	0.204188
g__Klebsiella.s__Klebsiella_pneumoniae	mode_of_delivery	Vaginal	-0.0942056	0.0380507	132	37	0.014611	0.210399
g__Bacteroides.s__Bacteroides_thetaiotaomicron	mode_of_delivery	Vaginal	0.0594682	0.0245172	132	27	0.0166901	0.218488
g__Streptococcus.s__Streptococcus_salivarius	visit_age_mo	visit_age_mo	-0.0207715	0.00908692	132	110	0.0239187	0.268809
g__Erysipelatoclostridium.s__Clostridium_innocuum	probiotics_firstyr	probiotics_firstyr	0.0200247	0.00878229	132	32	0.0242674	0.268809
g__Bifidobacterium.s__Bifidobacterium_breve	visit_age_mo	visit_age_mo	0.0609031	0.0282839	132	54	0.0331863	0.290611
g__Phocaeicola.s__Phocaeicola_dorei	mode_of_delivery	Vaginal	0.0724929	0.0340214	132	21	0.0350327	0.290611
g__Phocaeicola.s__Phocaeicola_dorei	probiotics_firstyr	probiotics_firstyr	-0.036267	0.0177881	132	21	0.0435422	0.290611
g__Enterococcus.s__Enterococcus_faecalis	probiotics_firstyr	probiotics_firstyr	0.0205725	0.00968155	132	85	0.0355311	0.290611
g__Streptococcus.s__Streptococcus_salivarius	probiotics_firstyr	probiotics_firstyr	0.0211677	0.0100381	132	110	0.0369322	0.290611
g__Mediterraneibacter.s__Ruminococcus_gnavus	visit_age_mo	visit_age_mo	0.02013	0.00934343	132	33	0.0330917	0.290611
g__Erysipelatoclostridium.s__Clostridium_innocuum	symptoms	Symptomatic	-0.0371253	0.0177421	132	32	0.038385	0.290611
g__Veillonella.s__Veillonella_atypica	mode_of_delivery	Vaginal	-0.0454419	0.0221114	132	40	0.0419158	0.290611
g__Veillonella.s__Veillonella_dispar	symptoms	Symptomatic	-0.0336469	0.0165711	132	40	0.0443989	0.290611

## Sheet: Resolved - species level
feature	metadata	value	coef	stderr	N	N.not.0	pval	qval
g__Faecalibacterium.s__Faecalibacterium_prausnitzii	visit_age_mo	visit_age_mo	0.0345511	0.00687761	142	17	1.5532e-06	0.000316853
g__Enterococcus.s__Enterococcus_faecalis	visit_age_mo	visit_age_mo	-0.0158461	0.00393981	142	71	9.48948e-05	0.00967927
g__Lacticaseibacillus.s__Lacticaseibacillus_rhamnosus	probiotics_firstyr	probiotics_firstyr	0.0388504	0.0121517	142	80	0.00172396	0.117229
g__Parabacteroides.s__Parabacteroides_distasonis	mode_of_delivery	Vaginal	0.0886749	0.0318217	142	32	0.00608231	0.124079
g__Enterococcus.s__Enterococcus_faecalis	mode_of_delivery	Vaginal	-0.0244838	0.00824056	142	71	0.00350525	0.124079
g__Enterocloster.s__Enterocloster_bolteae	visit_age_mo	visit_age_mo	0.0131904	0.00428668	142	36	0.00252503	0.124079
g__Klebsiella.s__Klebsiella_michiganensis	mode_of_delivery	Vaginal	-0.0464318	0.0164208	142	35	0.00539307	0.124079
g__Klebsiella.s__Klebsiella_michiganensis	visit_age_mo	visit_age_mo	-0.0219335	0.00785075	142	35	0.00595595	0.124079
g__Klebsiella.s__Klebsiella_pneumoniae	mode_of_delivery	Vaginal	-0.0728356	0.0254736	142	55	0.00491104	0.124079
g__Haemophilus.s__Haemophilus_parainfluenzae	mode_of_delivery	Vaginal	-0.0376806	0.0128159	142	80	0.00385185	0.124079
g__Tyzzerella.s__Tyzzerella_nexilis	visit_age_mo	visit_age_mo	0.0216705	0.00811183	142	44	0.00846761	0.157036
g__Clostridium.s__Clostridium_paraputrificum	visit_age_mo	visit_age_mo	-0.0210266	0.00820284	142	55	0.0114464	0.194589
g__Anaerostipes.s__Anaerostipes_caccae	visit_age_mo	visit_age_mo	0.0125813	0.00498093	142	40	0.0126788	0.198959
g__Mediterraneibacter.s__Ruminococcus_torques	symptoms	Resolved	-0.0281024	0.0112561	142	23	0.0137233	0.199969
g__Streptococcus.s__Streptococcus_thermophilus	visit_age_mo	visit_age_mo	0.0137015	0.00559146	142	52	0.0155293	0.204222
g__Tyzzerella.s__Tyzzerella_nexilis	symptoms	Resolved	0.0503729	0.0206551	142	44	0.0160174	0.204222
g__Bifidobacterium.s__Bifidobacterium_dentium	symptoms	Resolved	0.0765111	0.0320574	142	27	0.018367	0.211998
g__Bacteroides.s__Bacteroides_fragilis	visit_age_mo	visit_age_mo	0.0426024	0.0179279	142	32	0.0188701	0.211998
g__Clostridium.s__Clostridium_sp_C5_48	visit_age_mo	visit_age_mo	0.022071	0.00935673	142	35	0.0197449	0.211998
g__Lacticaseibacillus.s__Lacticaseibacillus_rhamnosus	mode_of_delivery	Vaginal	-0.0458325	0.0199543	142	80	0.0231422	0.232878
g__Mediterraneibacter.s__Ruminococcus_torques	probiotics_firstyr	probiotics_firstyr	0.0128547	0.00563075	142	23	0.0239727	0.232878
g__Bifidobacterium.s__Bifidobacterium_dentium	probiotics_firstyr	probiotics_firstyr	-0.0359621	0.0160363	142	27	0.0265331	0.244664
g__Streptococcus.s__Streptococcus_salivarius	visit_age_mo	visit_age_mo	-0.0176309	0.00791716	142	79	0.0275846	0.244664
g__Bifidobacterium.s__Bifidobacterium_bifidum	visit_age_mo	visit_age_mo	0.0328973	0.016165	142	46	0.0437694	0.292485
g__Bacteroides.s__Bacteroides_ovatus	symptoms	Resolved	-0.0569328	0.0276423	142	24	0.0413275	0.292485
g__Phocaeicola.s__Phocaeicola_vulgatus	mode_of_delivery	Vaginal	0.0912512	0.0446761	142	50	0.0430195	0.292485
g__Anaerostipes.s__Anaerostipes_caccae	symptoms	Resolved	0.0258434	0.0126829	142	40	0.043509	0.292485
g__Anaerostipes.s__Anaerostipes_caccae	probiotics_firstyr	probiotics_firstyr	-0.0132234	0.00634446	142	40	0.0389954	0.292485
g__Sellimonas.s__Sellimonas_intestinalis	visit_age_mo	visit_age_mo	0.0071776	0.00353836	142	27	0.0444463	0.292485
g__Intestinibacter.s__Intestinibacter_bartlettii	visit_age_mo	visit_age_mo	0.00618636	0.00294028	142	61	0.0372054	0.292485
g__Klebsiella.s__Klebsiella_michiganensis	symptoms	Resolved	0.0411214	0.0199903	142	35	0.0415764	0.292485
