# Supplementary material for: Strain-Level microbial signatures and inferred functional alterations in infants with Food Protein-Induced Allergic Proctocolitis
Source: Research Square preprint supplement (doi:10.21203/rs.3.rs-7112201/v1), 2025-08-27
Supplement: Supplementary file 9 [file c5e62692da7622bd39eada53.xlsx]

## Sheet: mash_statistics_table_20_specie
species	n_ap_samples	n_noap_samples	n_related	n_unrelated	raw_p_value_AP_vs_NoAP	adjusted_p_value_AP_vs_NoAP	raw_p_value_related_vs_unrelated	adjusted_p_value_related_vs_unrelated
Escherichia_coli	172	77	249	28192	0.0270177	0.0540355	1.48391e-88	2.96781e-88
Ruminococcus_B_gnavus	54	32	86	7789	0.00785981	0.0157196	4.11027e-24	8.22054e-24
Veillonella_parvula_A	38	33	71	7555	0.168271	0.336542	9.08662e-29	1.81732e-28
Lacticaseibacillus_rhamnosus	66	14	80	5380	0.0323425	0.0646849	1.29343e-05	2.58687e-05
Bacteroides_uniformis	121	23	144	4227	0.22083	0.44166	1.82862e-92	3.65723e-92
Parabacteroides_distasonis	89	40	129	3787	0.088494	0.176988	4.68941e-77	9.37881e-77
Phocaeicola_vulgatus	63	30	93	3562	0.798882	1	2.99907e-51	5.99813e-51
Bifidobacterium_breve	32	17	49	3272	0.0405484	0.0810968	8.08648e-23	1.6173e-22
Bifidobacterium_bifidum	54	14	68	2782	0.313112	0.626223	5.48046e-40	1.09609e-39
Enterococcus_faecalis	17	17	34	2111	0.0818946	0.163789	1.54774e-12	3.09547e-12
Clostridium_AQ_innocuum	30	10	40	1913	0.241367	0.482733	1.73656e-09	3.47311e-09
Bifidobacterium_longum	13	10	23	1747	0.0544784	0.108957	2.54054e-14	5.08108e-14
Bacteroides_thetaiotaomicron	59	20	79	1406	0.363992	0.727985	2.04728e-49	4.09455e-49
Enterocloster_sp900538485	7	9	16	1310	0.750824	1	6.75153e-08	1.35031e-07
Blautia_A_wexlerae	13	3	16	1209	0.500525	1	1.03634e-10	2.07268e-10
Phocaeicola_dorei	75	16	91	1134	0.531582	1	1.03249e-53	2.06497e-53
Bacteroides_fragilis	24	20	44	1037	0.786259	1	1.13481e-28	2.26961e-28
Erysipelatoclostridium_ramosum	10	8	18	972	0.0408885	0.081777	8.16902e-09	1.6338e-08
Veillonella_A_sp000431435	38	2	40	950	0.975242	1	2.72552e-18	5.45103e-18
Faecalimonas_phoceensis	8	2	10	936	1	1	0.048388	0.0967761
