# Supplementary material for: Strain-Level microbial signatures and inferred functional alterations in infants with Food Protein-Induced Allergic Proctocolitis
Source: Research Square preprint supplement (doi:10.21203/rs.3.rs-7112201/v1), 2025-08-27
Supplement: Supplementary file 10 [file d2f593b87162d81bdfb13496.xlsx]

## Sheet: Related vs unrelated 
Transition	P_Value
0 to 0.5	7.3667e-06
0.5 to 1	3.91026e-14
1 to 2	6.22882e-25
2 to 4	3.58607e-23
4 to 6	1.49475e-22
6 to 9	2.19111e-22
9 to 12	3.51792e-23

## Sheet: AP related
Transition	P_Value
0 to 0.5	0.935927
0.5 to 1	0.0223947
1 to 2	0.72536
2 to 4	0.0453801
4 to 6	0.269336
6 to 9	0.0514011
9 to 12	0.323277
