# Supplementary material for: Strain-Level microbial signatures and inferred functional alterations in infants with Food Protein-Induced Allergic Proctocolitis
Source: Research Square preprint supplement (doi:10.21203/rs.3.rs-7112201/v1), 2025-08-27
Supplement: Supplementary file 11 [file fcd071669ecf409f54eeacb3.xlsx]

## Sheet: species
Condition	True_AP_to_Pred_AP_Raw	True_AP_to_Pred_AP_Percent	True_AP_to_Pred_Control_Raw	True_AP_to_Pred_Control_Percent	True_Control_to_Pred_AP_Raw	True_Control_to_Pred_AP_Percent	True_Control_to_Pred_Control_Raw	True_Control_to_Pred_Control_Percent
Age > 6	145	72.9	19	33.3	54	27.1	38	66.7
Age ≤ 4	172	72.9	42	27.3	64	27.1	112	72.7
All samples	343	71.8	91	34.7	135	28.2	171	65.3

## Sheet: genus
Condition	True_AP_to_Pred_AP_Raw	True_AP_to_Pred_AP_Percent	True_AP_to_Pred_Control_Raw	True_AP_to_Pred_Control_Percent	True_Control_to_Pred_AP_Raw	True_Control_to_Pred_AP_Percent	True_Control_to_Pred_Control_Raw	True_Control_to_Pred_Control_Percent
Age > 6	145	72.9	19	33.3	54	27.1	38	66.7
Age ≤ 4	172	72.9	42	27.3	64	27.1	112	72.7
All samples	343	71.8	91	34.7	135	28.2	171	65.3
